# Supplementary material for: Medication eluting devices for the field of OBGYN (MEDOBGYN): 3D printed biodegradable hormone eluting constructs, a proof of concept study
Source: PLoS One. 2017 Aug 10;12(8):e0182929. doi: 10.1371/journal.pone.0182929 (PMC5552136; doi:10.1371/journal.pone.0182929)
Supplement: S1 File — (XLSX) [file pone.0182929.s003.xlsx]

## Sheet: XRDs
2θ	PCL control	Progestrone	E1	E2	E3		PCL-Progestrone	PCL-E1	PCL-E2	PCl-E3
10	203	323	355	339	242		76	73	103	139
10.02	200	369	322	349	233		114	85	89	203
10.04	239	316	340	286	242		115	72	114	139
10.06	245	342	322	361	226		95	77	79	157
10.08	240	357	342	352	215		115	80	102	144
10.1	237	354	327	326	259		94	88	80	141
10.12	244	320	372	344	245		98	81	98	145
10.14	238	334	339	346	244		99	83	93	152
10.16	248	370	358	324	259		106	67	94	138
10.18	248	313	316	302	242		115	79	81	159
10.2	225	382	326	304	284		93	75	89	137
10.22	252	392	358	324	245		117	82	103	157
10.24	251	372	349	322	255		83	80	109	145
10.26	214	351	323	319	220		88	82	90	131
10.28	250	376	318	307	245		116	67	102	145
10.3	253	341	349	330	259		93	78	98	141
10.32	249	388	336	323	235		84	67	82	139
10.34	237	369	357	334	226		89	74	75	152
10.36	249	356	328	297	226		91	65	86	115
10.38	231	394	383	306	211		83	95	89	138
10.4	252	394	352	327	213		111	82	93	133
10.42	283	384	338	345	230		101	86	68	146
10.44	245	403	314	362	255		100	88	89	138
10.46	246	372	330	336	239		90	83	97	146
10.48	257	431	342	329	248		92	83	105	124
10.5	242	415	382	340	222		91	71	87	154
10.52	255	444	336	353	236		96	56	83	159
10.54	253	470	289	348	244		103	71	79	133
10.56	242	453	347	329	266		95	65	98	131
10.58	283	437	323	320	236		97	66	97	134
10.6	277	455	354	334	239		96	80	89	146
10.62	294	504	315	325	235		98	69	84	125
10.64	253	520	355	369	226		86	78	95	119
10.66	255	563	360	345	249		78	86	95	137
10.68	276	577	333	348	234		99	69	90	137
10.7	233	665	342	319	254		89	74	82	142
10.72	255	656	373	312	256		99	58	80	131
10.74	276	733	318	304	240		86	72	88	141
10.76	251	609	350	333	242		96	61	100	123
10.78	277	558	364	331	229		76	59	92	125
10.8	251	484	334	332	277		90	70	89	139
10.82	252	447	312	325	232		89	70	102	130
10.84	275	403	322	352	216		104	83	84	102
10.86	276	406	322	316	274		95	70	103	145
10.88	263	348	360	319	261		101	83	96	139
10.9	290	337	315	333	231		119	73	78	155
10.92	259	358	330	353	270		84	61	77	124
10.94	251	345	310	331	239		95	68	100	162
10.96	273	373	331	316	275		90	81	84	135
10.98	270	409	303	327	239		85	77	90	152
11	288	342	322	332	254		100	68	92	124
11.02	292	360	346	328	232		88	58	70	114
11.04	249	348	329	322	261		94	69	97	126
11.06	273	353	393	344	249		97	79	85	131
11.08	239	361	302	328	246		75	71	90	152
11.1	278	341	307	304	218		93	66	87	127
11.12	270	360	312	317	240		100	68	70	140
11.14	248	349	367	307	265		103	93	100	124
11.16	271	346	347	348	221		72	83	87	147
11.18	263	353	359	337	224		95	63	97	113
11.2	277	354	361	327	269		94	71	92	134
11.22	231	383	346	333	253		89	45	96	147
11.24	266	359	336	330	225		90	60	84	128
11.26	260	354	343	347	267		107	80	78	130
11.28	278	363	332	357	223		79	68	84	131
11.3	262	361	338	352	239		94	61	79	155
11.32	236	349	329	339	258		99	88	97	146
11.34	251	355	342	359	264		92	79	77	136
11.36	243	345	312	339	249		96	102	80	123
11.38	270	364	339	341	219		107	68	85	130
11.4	253	373	350	353	235		87	66	102	118
11.42	258	319	341	340	258		79	74	74	137
11.44	272	357	349	333	238		94	68	86	130
11.46	266	354	368	355	260		76	66	85	173
11.48	279	361	340	369	233		96	67	83	107
11.5	246	357	324	377	260		83	71	88	145
11.52	251	359	311	396	224		83	81	84	126
11.54	260	324	352	353	233		91	86	77	155
11.56	262	362	331	349	246		114	74	91	129
11.58	260	334	353	343	260		82	81	90	142
11.6	286	335	347	347	223		101	70	94	148
11.62	279	377	385	331	272		88	67	101	138
11.64	268	368	312	339	241		83	70	85	146
11.66	258	367	312	348	235		96	79	113	135
11.68	247	359	352	362	234		107	65	89	132
11.7	280	332	329	399	207		96	79	82	139
11.72	266	359	339	405	219		95	63	90	120
11.74	260	361	361	378	235		74	75	82	130
11.76	240	351	319	445	234		115	73	85	122
11.78	258	394	365	407	259		96	69	94	138
11.8	270	355	347	430	268		94	69	81	129
11.82	258	378	346	407	257		81	79	88	163
11.84	301	337	355	407	226		90	74	78	163
11.86	266	311	340	369	251		87	85	75	138
11.88	289	375	342	397	260		95	69	93	148
11.9	295	364	323	352	247		88	74	105	124
11.92	251	341	338	366	234		91	89	88	146
11.94	266	379	338	353	223		85	77	97	155
11.96	322	384	348	336	253		93	75	106	150
11.98	286	362	318	388	252		89	67	101	176
12	269	371	341	352	225		99	88	101	141
12.02	238	324	366	371	245		92	97	88	152
12.04	300	375	346	326	232		102	88	101	151
12.06	285	381	352	344	240		83	81	115	142
12.08	288	372	376	331	231		84	68	95	155
12.1	286	357	332	310	259		83	75	85	162
12.12	299	374	358	332	273		93	90	95	154
12.14	275	389	359	335	235		90	71	92	178
12.16	276	368	350	359	241		93	85	91	143
12.18	312	377	379	339	259		95	78	92	159
12.2	280	357	342	359	252		108	80	99	153
12.22	286	386	375	367	250		105	78	108	160
12.24	272	356	383	356	252		70	56	98	175
12.26	270	393	346	334	250		98	64	98	140
12.28	280	361	357	330	278		82	74	91	148
12.3	287	402	350	330	256		97	92	82	170
12.32	279	369	424	336	261		79	77	96	157
12.34	265	396	361	313	258		104	84	83	156
12.36	272	365	383	360	254		76	61	87	190
12.38	281	357	379	341	250		100	82	97	162
12.4	307	394	331	344	278		83	60	95	156
12.42	290	407	367	362	242		88	67	98	186
12.44	302	386	364	358	258		101	56	79	163
12.46	305	374	362	343	256		88	65	82	173
12.48	303	443	334	382	247		94	71	82	149
12.5	265	454	366	346	262		99	59	86	171
12.52	300	412	377	321	285		101	61	76	157
12.54	281	444	374	358	250		87	77	90	152
12.56	277	423	349	335	251		87	68	92	138
12.58	311	471	409	346	264		83	93	89	141
12.6	312	478	371	375	279		92	75	94	163
12.62	316	485	349	378	246		92	69	95	142
12.64	321	502	374	370	271		97	80	86	143
12.66	298	500	377	327	261		84	59	103	151
12.68	338	545	360	375	268		83	64	73	140
12.7	308	568	374	375	298		79	68	93	141
12.72	301	584	381	383	270		87	63	71	128
12.74	294	684	332	369	267		99	87	105	138
12.76	303	696	341	406	277		90	60	98	124
12.78	310	759	368	358	292		92	84	87	123
12.8	291	888	321	359	270		97	72	89	135
12.82	289	951	392	394	294		81	74	74	149
12.84	312	1066	362	373	245		102	53	94	146
12.86	308	998	397	420	291		77	71	62	140
12.88	320	1013	358	395	302		91	84	71	142
12.9	328	844	369	381	284		90	76	84	111
12.92	281	714	379	344	277		97	66	93	149
12.94	325	650	348	390	288		95	74	76	160
12.96	341	511	373	396	286		102	61	88	136
12.98	296	457	367	396	284		87	66	89	154
13	326	432	411	423	303		85	83	89	171
13.02	320	418	375	442	343		79	67	70	121
13.04	303	436	395	428	321		87	76	90	143
13.06	370	449	394	417	348		91	64	78	123
13.08	343	430	419	476	382		87	69	115	137
13.1	336	415	381	494	412		98	70	93	156
13.12	327	405	386	492	391		97	79	100	161
13.14	325	454	370	507	426		91	88	93	148
13.16	359	406	392	580	416		82	65	97	158
13.18	281	414	342	593	465		91	78	98	138
13.2	320	425	391	591	431		96	66	82	142
13.22	339	389	403	648	371		122	66	90	118
13.24	300	406	381	730	313		101	79	89	122
13.26	316	389	372	770	285		88	81	99	161
13.28	338	390	339	886	291		88	73	87	119
13.3	326	382	347	980	282		100	70	96	131
13.32	311	426	355	1084	270		87	65	81	165
13.34	265	442	419	1337	275		85	81	88	139
13.36	324	399	392	1442	283		91	71	90	127
13.38	304	355	377	1576	282		92	77	90	143
13.4	296	421	370	1439	288		104	74	97	144
13.42	319	400	374	1185	290		82	81	82	140
13.44	311	386	391	889	298		95	88	74	162
13.46	309	422	417	698	271		108	94	84	152
13.48	315	395	398	609	279		91	61	105	157
13.5	325	390	354	501	278		83	71	108	139
13.52	327	402	431	463	298		95	74	94	145
13.54	305	403	374	460	309		96	80	91	162
13.56	351	408	414	478	240		83	68	94	165
13.58	312	389	420	436	278		97	59	106	128
13.6	352	431	368	411	278		86	71	81	144
13.62	353	390	401	413	307		99	69	97	173
13.64	357	414	390	409	295		100	63	101	134
13.66	344	422	409	431	302		94	64	91	140
13.68	342	397	412	416	262		87	77	93	156
13.7	333	412	436	398	255		104	76	65	134
13.72	340	415	398	376	277		91	70	97	162
13.74	337	407	391	400	280		99	65	76	143
13.76	354	425	373	400	260		82	79	116	157
13.78	337	408	385	380	281		81	80	78	164
13.8	364	397	386	427	275		106	56	95	157
13.82	339	393	399	417	269		107	72	91	149
13.84	362	415	413	433	276		87	79	88	162
13.86	339	451	419	418	285		88	80	87	158
13.88	343	409	450	368	243		96	82	108	176
13.9	347	417	457	382	270		88	84	105	161
13.92	363	439	417	403	301		96	72	74	132
13.94	338	439	411	424	255		71	70	85	174
13.96	371	404	420	417	281		99	78	103	162
13.98	346	423	433	390	237		107	68	103	164
14	370	452	433	437	296		100	93	105	151
14.02	304	470	455	412	309		94	99	90	163
14.04	375	441	431	433	331		110	84	83	149
14.06	422	448	429	397	293		89	78	85	174
14.08	353	471	418	398	299		96	74	99	170
14.1	368	416	435	363	308		83	72	80	175
14.12	391	439	430	397	277		88	87	116	159
14.14	375	477	461	378	311		109	78	87	164
14.16	393	451	459	429	297		105	92	117	186
14.18	313	488	492	412	319		84	97	116	164
14.2	343	461	550	404	288		91	92	88	166
14.22	368	480	466	449	310		93	87	107	165
14.24	379	503	510	367	301		95	117	101	182
14.26	356	445	495	401	298		93	108	112	157
14.28	374	422	528	442	280		104	113	117	179
14.3	374	446	549	445	299		103	92	117	167
14.32	373	441	569	439	332		87	71	97	167
14.34	369	478	667	420	329		76	109	108	151
14.36	384	466	709	391	325		99	87	118	177
14.38	354	472	839	429	318		88	106	88	183
14.4	391	495	893	418	310		82	99	136	188
14.42	364	480	942	462	315		92	98	113	185
14.44	390	483	848	433	311		82	90	102	173
14.46	362	449	807	425	302		127	82	113	188
14.48	424	487	646	446	314		106	100	104	181
14.5	396	502	554	452	303		92	78	102	212
14.52	414	535	503	442	337		96	99	121	181
14.54	387	526	467	467	307		96	103	120	184
14.56	390	558	440	449	309		94	100	114	200
14.58	400	535	451	464	332		119	97	98	198
14.6	415	579	481	479	294		113	110	116	217
14.62	388	636	494	428	333		117	113	127	238
14.64	373	607	463	497	353		109	101	129	180
14.66	343	661	514	492	358		120	97	111	183
14.68	381	660	513	481	319		118	107	122	215
14.7	386	658	506	479	366		117	101	130	214
14.72	392	638	486	499	418		115	107	138	209
14.74	424	653	509	483	404		108	124	130	233
14.76	392	577	504	477	416		115	104	138	214
14.78	382	504	520	475	371		122	106	117	221
14.8	400	563	542	491	381		118	94	121	204
14.82	409	517	551	449	367		117	89	122	229
14.84	435	493	605	474	337		136	82	140	225
14.86	428	515	620	431	355		115	84	122	240
14.88	445	508	668	494	344		116	95	95	239
14.9	394	472	775	441	319		126	102	119	232
14.92	396	488	833	471	291		138	88	139	214
14.94	440	461	745	480	337		102	98	112	230
14.96	441	496	762	480	295		115	106	116	241
14.98	395	491	721	464	334		106	90	129	212
15	417	506	700	471	324		112	93	123	216
15.02	419	533	652	471	352		114	93	125	246
15.04	417	505	766	497	367		97	96	105	232
15.06	421	539	772	479	374		114	80	134	233
15.08	412	554	837	480	342		109	80	88	220
15.1	423	502	1006	495	369		107	89	109	236
15.12	409	535	1070	484	324		117	110	113	246
15.14	418	556	1224	462	339		106	90	114	196
15.16	430	563	1513	483	383		113	81	116	242
15.18	470	544	1823	504	357		120	85	134	240
15.2	455	524	1868	496	365		122	81	123	225
15.22	426	577	1887	487	365		109	82	110	222
15.24	437	527	1442	534	366		124	91	112	192
15.26	447	552	1115	504	357		103	89	93	220
15.28	480	534	779	527	346		118	87	106	202
15.3	425	547	594	521	375		96	83	106	207
15.32	468	563	558	517	370		100	88	98	229
15.34	479	603	566	518	379		110	88	121	207
15.36	529	621	516	533	411		118	70	92	221
15.38	513	666	571	570	351		104	90	114	214
15.4	462	667	580	566	389		119	88	104	213
15.42	470	614	562	602	389		96	71	119	189
15.44	459	728	554	622	363		102	88	108	200
15.46	496	741	529	617	371		100	81	98	205
15.48	493	737	580	645	387		109	87	88	204
15.5	514	752	547	636	376		108	81	104	188
15.52	500	666	537	679	364		107	77	108	216
15.54	498	645	478	682	387		111	88	95	191
15.56	548	632	537	751	375		121	90	90	196
15.58	518	576	504	776	342		109	103	105	205
15.6	528	619	556	792	368		105	92	122	189
15.62	586	580	563	867	368		83	85	81	174
15.64	552	610	540	952	372		117	93	113	209
15.66	531	600	514	983	375		97	90	112	177
15.68	501	622	536	996	350		116	84	94	206
15.7	525	551	517	950	378		93	72	106	209
15.72	556	588	553	895	345		119	77	123	209
15.74	548	596	550	814	383		114	81	111	216
15.76	527	550	493	747	357		99	94	104	186
15.78	484	575	567	743	363		117	94	139	196
15.8	545	562	541	753	391		101	80	108	190
15.82	522	551	534	753	388		100	100	114	190
15.84	556	589	511	821	365		116	84	125	174
15.86	536	636	564	872	409		108	86	115	196
15.88	529	587	535	933	361		109	100	121	190
15.9	530	545	556	1026	435		110	101	97	189
15.92	530	582	535	1109	436		90	62	117	211
15.94	540	591	586	1329	411		116	71	108	196
15.96	530	632	585	1349	397		100	91	90	238
15.98	508	597	533	1308	377		97	103	108	219
16	540	558	546	1158	418		97	80	115	225
16.02	530	590	548	960	412		98	97	110	201
16.04	530	589	578	784	419		125	106	124	219
16.06	556	573	556	759	409		103	85	99	194
16.08	553	602	543	710	381		123	90	124	214
16.1	519	602	544	591	405		97	93	95	196
16.12	598	600	604	597	379		103	83	125	223
16.14	536	611	595	570	392		111	85	107	207
16.16	562	589	575	625	406		101	78	97	208
16.18	571	605	585	614	404		132	88	119	212
16.2	514	653	607	580	409		90	99	111	217
16.22	539	623	565	624	390		116	89	115	200
16.24	575	623	585	608	406		122	114	132	210
16.26	510	620	579	544	380		110	104	108	233
16.28	526	613	594	572	406		109	94	118	212
16.3	517	598	560	582	418		112	106	128	221
16.32	505	623	587	583	438		106	102	128	224
16.34	540	616	586	589	414		104	93	141	212
16.36	567	648	571	604	448		98	90	103	243
16.38	562	657	579	552	412		88	105	118	233
16.4	552	613	567	595	411		91	113	111	197
16.42	536	604	585	611	440		117	102	117	231
16.44	562	623	589	619	401		91	111	140	211
16.46	524	691	596	557	406		86	88	124	216
16.48	567	650	599	554	418		106	111	124	236
16.5	484	666	596	529	425		111	89	145	236
16.52	539	700	622	586	428		111	109	126	204
16.54	582	667	575	620	423		127	102	121	227
16.56	594	650	568	561	413		126	116	115	207
16.58	559	728	631	593	423		112	100	133	222
16.6	525	647	610	603	433		132	103	142	240
16.62	556	689	586	608	446		132	106	100	238
16.64	548	677	600	587	452		114	88	115	242
16.66	586	676	609	588	447		125	113	137	241
16.68	552	706	572	602	441		132	102	149	224
16.7	592	672	600	584	439		126	108	125	240
16.72	543	669	631	596	437		111	109	112	244
16.74	562	672	657	643	380		119	99	132	232
16.76	543	713	629	620	456		108	93	132	243
16.78	587	718	616	598	470		132	108	145	229
16.8	578	783	583	610	456		122	101	150	247
16.82	586	766	630	624	443		95	114	137	218
16.84	601	831	644	590	468		125	108	132	244
16.86	591	833	600	599	393		123	102	135	255
16.88	575	867	637	677	426		137	107	137	239
16.9	568	936	611	612	441		125	105	138	276
16.92	578	988	642	638	484		124	110	131	244
16.94	621	1051	687	585	472		149	116	149	263
16.96	633	1134	659	572	458		134	121	137	243
16.98	618	1259	686	618	416		122	108	125	253
17	601	1347	659	567	436		126	123	138	249
17.02	616	1422	626	611	421		125	112	151	269
17.04	604	1384	654	667	399		119	96	132	293
17.06	623	1400	672	628	442		125	117	142	250
17.08	588	1255	674	624	431		125	104	114	249
17.1	628	1164	623	604	460		131	97	142	255
17.12	592	1166	674	640	447		146	111	158	248
17.14	636	1135	666	615	434		131	110	133	235
17.16	617	1158	747	642	445		138	117	144	254
17.18	643	1200	751	618	476		141	104	130	252
17.2	596	1165	759	629	473		134	109	127	260
17.22	554	1050	770	633	478		115	107	137	247
17.24	599	978	795	628	461		128	111	167	274
17.26	608	857	848	618	469		133	105	159	265
17.28	628	866	883	592	464		147	121	130	273
17.3	632	826	1010	654	485		147	140	145	283
17.32	635	737	1175	620	470		119	118	149	258
17.34	649	676	1338	634	469		133	112	139	296
17.36	641	707	1285	609	470		121	116	152	272
17.38	629	747	1125	649	481		131	115	173	268
17.4	648	719	1007	628	431		129	129	156	293
17.42	619	686	841	668	498		143	128	147	273
17.44	659	726	752	616	440		127	110	160	321
17.46	647	692	723	632	431		147	133	152	304
17.48	594	715	745	632	442		146	129	150	266
17.5	611	709	689	648	461		135	129	140	274
17.52	641	659	720	631	449		144	105	168	304
17.54	665	699	683	659	482		133	134	144	264
17.56	681	674	695	632	431		154	134	164	277
17.58	652	682	759	683	474		140	137	163	285
17.6	622	642	762	692	440		150	128	164	305
17.62	652	676	738	650	465		147	110	156	309
17.64	620	736	737	672	485		159	128	195	287
17.66	629	731	744	658	463		154	121	160	302
17.68	649	661	775	689	474		161	123	138	303
17.7	708	667	740	722	479		135	132	159	294
17.72	674	758	790	714	464		130	138	157	313
17.74	652	705	772	687	455		152	118	144	310
17.76	641	722	740	683	472		145	115	164	326
17.78	676	718	679	726	470		156	139	178	349
17.8	622	704	674	733	483		141	142	148	319
17.82	689	683	690	798	464		138	148	171	320
17.84	674	690	713	846	495		158	107	145	324
17.86	665	751	689	800	467		146	115	160	324
17.88	673	685	714	807	483		150	128	142	322
17.9	633	716	702	754	486		135	138	171	348
17.92	693	700	663	756	479		144	128	155	313
17.94	674	699	624	696	453		153	150	170	325
17.96	704	729	676	665	439		161	100	162	345
17.98	697	706	713	730	472		173	113	177	335
18	717	672	655	687	496		171	131	176	372
18.02	695	699	728	719	504		183	134	181	347
18.04	676	722	690	672	486		142	131	167	342
18.06	708	692	704	711	526		137	126	165	354
18.08	663	683	721	646	487		175	137	171	365
18.1	728	709	633	697	508		169	115	171	316
18.12	722	770	722	739	517		167	136	151	354
18.14	750	715	715	737	471		174	137	160	356
18.16	718	761	727	723	487		172	110	176	331
18.18	723	755	792	749	495		143	124	169	351
18.2	705	777	743	804	501		150	109	178	325
18.22	730	802	878	789	486		158	133	164	331
18.24	711	752	916	865	474		171	144	155	328
18.26	682	822	929	853	448		147	124	160	373
18.28	727	786	975	891	506		146	130	173	337
18.3	712	847	1079	953	478		157	134	151	330
18.32	689	846	1168	991	437		197	133	178	383
18.34	746	818	1250	1118	501		155	137	160	343
18.36	699	829	1268	1317	496		174	134	182	342
18.38	689	835	1127	1614	467		158	132	194	379
18.4	715	782	1076	1667	471		170	140	176	361
18.42	735	790	940	1900	436		149	137	175	355
18.44	769	724	861	2017	472		163	168	182	367
18.46	739	787	753	1881	519		176	118	209	364
18.48	782	698	759	1649	484		169	148	193	376
18.5	725	756	712	1423	526		161	145	179	362
18.52	747	684	675	1215	538		141	126	171	353
18.54	773	763	673	969	508		155	124	157	358
18.56	762	698	689	860	503		192	151	161	354
18.58	695	697	718	783	501		166	147	184	368
18.6	738	727	688	776	490		158	134	181	364
18.62	790	719	679	787	519		173	151	165	370
18.64	734	707	666	693	475		168	138	214	330
18.66	731	723	653	720	464		175	142	183	381
18.68	749	700	734	701	472		171	140	207	364
18.7	770	726	683	695	471		190	155	177	373
18.72	758	734	678	715	515		146	141	187	349
18.74	792	700	631	658	468		161	155	193	382
18.76	723	728	661	740	464		198	131	169	360
18.78	766	725	651	665	481		179	127	184	404
18.8	744	726	671	622	477		161	164	208	334
18.82	795	724	622	665	464		170	156	187	394
18.84	757	674	662	655	497		165	116	193	379
18.86	755	740	683	693	510		189	146	188	392
18.88	768	725	694	698	507		169	136	178	377
18.9	728	704	674	672	480		173	153	188	347
18.92	774	722	645	643	483		181	154	189	360
18.94	764	728	676	670	461		170	134	196	374
18.96	741	733	667	670	449		192	145	186	393
18.98	806	712	677	685	505		169	136	188	413
19	759	740	690	628	510		223	157	185	384
19.02	751	743	683	680	516		172	142	214	358
19.04	795	769	644	690	495		185	120	187	382
19.06	773	725	657	675	497		203	138	153	374
19.08	755	746	643	701	488		161	150	196	426
19.1	799	750	661	750	472		165	151	176	402
19.12	789	821	647	728	505		187	157	189	408
19.14	811	829	744	764	511		177	142	184	394
19.16	836	794	623	697	499		174	147	168	338
19.18	826	733	625	778	498		185	155	193	378
19.2	855	725	705	785	465		172	136	177	398
19.22	782	698	637	856	485		211	168	180	424
19.24	796	728	689	909	494		166	155	214	424
19.26	803	687	716	908	505		189	154	189	409
19.28	824	727	679	902	487		177	156	184	403
19.3	798	713	639	839	486		161	169	202	367
19.32	810	712	740	780	478		186	158	185	400
19.34	873	714	698	753	493		198	169	233	404
19.36	848	662	685	690	528		177	129	192	443
19.38	809	732	684	731	478		171	151	192	419
19.4	801	716	694	594	460		191	139	206	389
19.42	850	723	680	637	517		211	119	189	446
19.44	773	770	664	668	501		178	161	198	450
19.46	762	737	672	698	506		181	166	186	438
19.48	827	725	656	617	428		157	158	192	422
19.5	836	713	647	638	484		186	164	225	417
19.52	817	683	658	683	507		204	144	204	461
19.54	823	711	701	634	503		188	146	224	434
19.56	860	732	708	641	481		156	144	194	465
19.58	838	691	634	668	494		196	170	199	401
19.6	832	706	644	645	492		181	149	208	460
19.62	843	677	693	689	472		196	147	229	411
19.64	810	787	688	666	490		188	154	175	434
19.66	779	742	655	670	490		175	131	180	469
19.68	851	704	638	734	501		177	166	216	429
19.7	846	757	715	670	449		178	180	223	445
19.72	824	756	689	664	483		193	123	209	460
19.74	899	737	727	678	474		190	155	214	478
19.76	860	749	663	661	498		201	159	183	477
19.78	784	738	702	671	467		197	162	224	485
19.8	896	734	684	620	482		201	170	209	475
19.82	821	706	689	666	462		211	189	197	467
19.84	815	706	733	690	496		186	180	195	523
19.86	848	719	789	635	514		196	145	219	469
19.88	826	726	702	629	504		194	180	229	480
19.9	831	696	727	660	555		193	183	232	507
19.92	844	688	769	706	479		178	182	198	478
19.94	866	724	788	667	508		199	192	215	457
19.96	848	667	749	652	537		216	204	201	465
19.98	822	716	826	657	458		199	216	227	461
20	892	729	796	647	532		212	227	222	503
20.02	859	675	897	629	517		212	225	245	488
20.04	828	757	954	667	472		230	210	237	523
20.06	864	699	980	700	490		229	256	287	516
20.08	870	704	1092	669	505		233	283	276	477
20.1	862	750	1330	658	461		261	293	312	455
20.12	831	701	1634	629	481		244	290	330	555
20.14	900	698	1729	705	526		259	322	325	547
20.16	840	742	1987	614	556		234	308	333	553
20.18	899	650	2029	698	540		291	348	363	538
20.2	943	707	1723	671	536		283	346	412	604
20.22	858	655	1421	702	578		286	380	451	635
20.24	901	720	1206	655	594		331	405	482	613
20.26	866	671	1009	676	591		310	456	474	703
20.28	879	617	882	706	613		348	480	552	713
20.3	817	683	844	703	615		390	515	599	747
20.32	845	681	897	649	611		440	569	629	827
20.34	852	642	833	718	616		413	602	715	814
20.36	822	740	878	679	553		484	678	745	953
20.38	935	691	905	705	579		511	777	820	989
20.4	900	696	985	691	617		660	824	879	1069
20.42	858	686	1034	695	579		636	922	992	1143
20.44	811	652	991	784	629		711	973	1067	1275
20.46	916	656	1003	712	635		780	996	1146	1359
20.48	891	761	886	783	684		878	1083	1269	1464
20.5	886	715	828	796	721		933	1069	1345	1688
20.52	893	697	794	800	735		1054	1056	1303	1785
20.54	864	716	711	858	904		1080	953	1365	1996
20.56	864	708	724	917	963		1113	902	1316	2084
20.58	875	740	697	905	821		1175	827	1267	2202
20.6	928	693	709	958	795		1197	814	1135	2361
20.62	926	739	658	1037	636		1174	663	1049	2522
20.64	976	703	680	1063	596		1179	572	999	2497
20.66	955	684	660	1050	538		1184	519	947	2667
20.68	881	714	688	956	545		1125	450	775	2668
20.7	902	699	651	881	483		1036	415	770	2686
20.72	898	679	680	811	496		928	365	640	2671
20.74	927	700	678	710	490		909	320	537	2557
20.76	950	701	647	644	553		757	279	487	2305
20.78	1017	628	641	702	515		726	254	445	2217
20.8	972	681	628	716	503		674	251	363	2081
20.82	987	653	657	659	498		588	236	385	1836
20.84	1042	704	701	618	473		503	224	335	1674
20.86	995	700	691	633	486		448	203	277	1499
20.88	966	721	644	630	487		460	236	299	1331
20.9	1033	739	656	675	468		406	247	302	1303
20.92	1068	724	665	597	449		377	225	295	1139
20.94	1064	720	646	587	490		337	228	281	955
20.96	1104	744	689	640	487		305	205	287	917
20.98	1076	747	675	618	452		285	230	288	834
21	1135	810	672	666	481		310	245	339	752
21.02	1185	728	645	635	448		295	237	304	699
21.04	1292	721	699	632	504		324	266	297	705
21.06	1355	748	646	651	478		325	251	303	702
21.08	1304	716	654	638	453		326	278	329	707
21.1	1418	717	665	653	510		313	269	344	678
21.12	1519	732	673	640	444		310	254	353	684
21.14	1580	645	683	619	491		325	246	328	681
21.16	1598	691	676	599	440		369	223	362	677
21.18	1683	699	711	682	495		298	223	357	703
21.2	1820	681	686	609	498		320	229	351	711
21.22	2018	700	715	618	503		317	221	319	715
21.24	2160	703	722	572	465		312	197	334	751
21.26	2323	745	672	663	453		323	225	331	711
21.28	2491	733	672	671	529		315	206	277	694
21.3	2688	677	663	634	513		310	217	270	702
21.32	2893	710	685	600	535		320	190	284	737
21.34	3088	705	644	609	509		301	166	249	721
21.36	3315	738	634	625	493		302	153	231	693
21.38	3429	693	693	617	523		259	142	207	714
21.4	3519	779	654	707	519		266	147	200	678
21.42	3499	709	615	600	518		232	133	178	645
21.44	3638	682	629	603	457		225	122	185	586
21.46	3569	739	655	651	496		263	128	158	607
21.48	3461	744	667	651	429		201	101	169	534
21.5	3540	719	620	636	441		208	125	187	559
21.52	3307	829	637	640	489		193	126	170	530
21.54	3159	746	638	606	461		197	122	189	464
21.56	3025	707	617	636	451		163	104	164	463
21.58	2775	700	624	628	461		176	108	140	426
21.6	2730	660	670	611	453		152	107	153	447
21.62	2475	646	586	638	457		174	103	145	382
21.64	2215	666	575	627	443		167	134	119	372
21.66	2172	642	626	664	489		157	107	113	350
21.68	1985	681	591	629	478		162	82	146	380
21.7	1913	664	633	679	460		150	124	143	304
21.72	1769	670	649	601	472		146	104	135	333
21.74	1586	709	595	639	486		138	117	143	311
21.76	1603	693	609	616	495		157	101	135	343
21.78	1434	676	662	591	428		137	114	147	338
21.8	1331	654	621	666	496		137	102	134	321
21.82	1385	648	639	645	460		140	106	140	326
21.84	1269	640	616	650	423		146	102	125	317
21.86	1263	628	629	648	449		127	92	119	265
21.88	1206	621	673	610	427		131	117	132	315
21.9	1189	679	633	684	429		153	86	131	308
21.92	1213	667	659	642	454		129	90	146	320
21.94	1169	657	581	729	473		136	131	132	285
21.96	1188	631	639	751	437		126	94	133	286
21.98	1213	635	624	692	471		135	102	122	305
22	1182	671	646	759	471		132	96	120	292
22.02	1145	672	582	708	440		151	100	130	268
22.04	1249	637	649	735	450		156	96	115	280
22.06	1152	636	571	702	465		107	92	128	258
22.08	1157	652	650	745	483		131	97	118	288
22.1	1207	681	644	645	451		138	93	127	273
22.12	1102	679	602	609	436		143	115	109	298
22.14	1145	678	628	635	454		144	102	140	278
22.16	1113	685	628	597	417		125	131	131	263
22.18	1056	665	625	646	463		140	85	126	313
22.2	1062	631	619	674	421		139	100	142	267
22.22	1085	676	598	653	428		124	102	131	274
22.24	995	677	589	600	437		128	118	144	257
22.26	1005	725	628	623	465		139	109	137	266
22.28	1065	736	580	620	426		144	124	126	304
22.3	932	710	613	603	400		113	124	129	285
22.32	946	805	598	632	437		143	102	138	291
22.34	896	738	568	574	412		158	126	181	276
22.36	924	732	582	622	432		178	133	152	305
22.38	834	719	646	640	403		162	141	152	293
22.4	877	766	557	588	441		156	143	157	288
22.42	856	703	634	569	435		153	130	180	359
22.44	886	646	599	591	445		146	161	193	301
22.46	826	681	650	613	380		144	179	193	321
22.48	777	677	623	622	434		152	176	221	322
22.5	841	677	606	589	420		143	169	234	315
22.52	753	659	605	553	438		178	204	220	314
22.54	727	751	594	617	424		168	206	239	355
22.56	730	704	614	631	392		156	212	227	363
22.58	746	716	559	693	413		162	233	249	374
22.6	773	701	607	677	418		188	219	289	412
22.62	766	754	605	653	452		192	231	276	447
22.64	752	735	597	656	448		227	270	297	468
22.66	753	734	569	701	425		231	288	306	428
22.68	743	704	543	708	417		246	323	350	518
22.7	717	770	558	772	411		274	340	365	539
22.72	701	689	598	767	399		304	329	430	512
22.74	670	705	620	789	449		295	373	382	604
22.76	736	673	620	854	426		260	387	446	640
22.78	642	647	583	978	424		337	360	442	663
22.8	699	659	650	1067	427		370	364	514	766
22.82	699	617	680	1204	397		382	351	458	771
22.84	689	627	630	1160	432		406	386	509	825
22.86	707	638	671	1142	385		435	399	489	923
22.88	732	639	633	1037	422		456	321	454	867
22.9	700	612	664	924	407		410	325	421	963
22.92	688	608	634	812	396		397	264	411	991
22.94	693	618	625	700	379		453	255	410	951
22.96	697	635	631	638	387		453	248	381	962
22.98	664	648	592	652	421		446	218	356	991
23	657	595	613	648	390		407	215	319	1024
23.02	691	589	581	609	394		403	174	289	1020
23.04	694	602	631	597	414		377	203	261	945
23.06	661	557	635	566	431		369	161	255	902
23.08	663	597	593	585	414		318	158	222	877
23.1	767	605	642	543	418		337	137	239	804
23.12	731	618	647	575	411		310	139	184	767
23.14	686	575	684	563	434		286	129	176	693
23.16	715	575	747	588	401		280	126	160	679
23.18	699	618	772	569	398		241	103	198	641
23.2	686	570	812	618	396		226	123	154	582
23.22	703	588	815	550	422		202	119	162	563
23.24	693	642	719	576	411		208	134	154	506
23.26	724	588	677	561	418		204	113	182	501
23.28	676	576	690	594	376		230	118	167	483
23.3	737	611	594	535	382		195	117	135	430
23.32	708	549	587	538	438		178	145	160	419
23.34	750	577	580	585	373		187	118	120	392
23.36	740	591	563	567	394		183	114	164	373
23.38	791	572	572	528	384		174	115	160	377
23.4	792	560	599	545	403		161	92	127	345
23.42	850	549	558	510	411		171	106	156	345
23.44	804	586	528	533	401		155	117	152	344
23.46	875	614	513	528	394		148	110	135	352
23.48	843	568	515	581	383		146	79	145	332
23.5	866	652	572	535	403		149	98	126	346
23.52	955	597	554	554	404		146	100	130	313
23.54	934	590	505	551	388		159	81	115	332
23.56	978	535	575	543	394		144	86	126	313
23.58	1066	578	511	546	395		121	92	135	265
23.6	1084	540	525	540	400		131	88	115	307
23.62	1221	579	538	544	384		131	86	118	295
23.64	1235	560	529	557	369		115	97	114	264
23.66	1304	539	547	597	347		117	80	123	284
23.68	1279	517	532	588	427		138	77	91	244
23.7	1401	566	521	568	406		124	72	116	224
23.72	1367	536	539	532	396		119	64	90	243
23.74	1442	569	496	536	354		111	65	101	257
23.76	1472	575	509	537	363		111	67	92	232
23.78	1529	553	531	540	353		91	63	90	214
23.8	1493	561	494	530	354		99	82	86	221
23.82	1494	588	524	527	376		96	58	100	192
23.84	1418	558	541	533	370		101	58	89	247
23.86	1515	575	491	556	408		108	65	89	217
23.88	1428	563	526	562	375		94	57	77	174
23.9	1388	585	504	574	369		97	49	80	199
23.92	1381	552	500	581	395		99	60	103	164
23.94	1309	568	526	655	367		101	51	69	177
23.96	1306	530	474	696	374		94	61	75	178
23.98	1228	564	506	721	380		77	62	75	172
24	1169	564	560	788	367		77	75	79	162
24.02	1147	552	488	765	356		81	84	81	179
24.04	1123	575	537	740	355		85	81	72	178
24.06	1048	586	571	686	361		86	65	77	163
24.08	969	545	528	705	352		82	56	86	145
24.1	963	539	543	634	374		84	46	62	192
24.12	953	562	586	596	355		74	50	70	152
24.14	877	556	585	564	361		84	59	63	158
24.16	825	507	592	572	362		91	52	80	203
24.18	881	493	557	548	322		85	58	74	176
24.2	829	475	578	580	386		89	58	72	176
24.22	849	503	521	557	312		80	63	73	162
24.24	804	547	539	550	359		79	69	67	168
24.26	736	528	486	524	367		80	55	66	152
24.28	798	535	495	530	346		82	53	73	168
24.3	757	514	538	553	333		69	51	60	167
24.32	709	464	482	573	344		82	62	68	160
24.34	721	507	545	521	360		85	44	74	159
24.36	679	548	475	497	370		79	62	74	149
24.38	653	532	524	497	385		83	53	69	161
24.4	737	527	515	517	355		76	60	76	157
24.42	689	528	538	486	356		86	71	73	133
24.44	667	484	488	484	385		88	61	61	154
24.46	636	507	547	524	382		79	53	64	120
24.48	692	530	539	459	326		80	57	75	131
24.5	661	475	543	475	330		71	48	72	125
24.52	679	523	495	528	345		67	52	71	130
24.54	636	530	556	465	308		80	56	69	165
24.56	571	482	513	469	353		61	59	65	165
24.58	657	496	542	506	358		72	61	66	135
24.6	570	492	501	480	368		72	47	65	141
24.62	595	523	498	482	341		80	58	86	144
24.64	596	471	501	485	339		77	58	69	140
24.66	563	494	490	489	355		83	64	48	140
24.68	565	537	516	491	368		84	51	64	128
24.7	569	485	489	486	330		93	56	68	135
24.72	505	478	464	472	339		87	51	69	121
24.74	528	516	469	465	341		69	51	58	149
24.76	600	510	482	466	341		79	54	68	135
24.78	523	468	468	461	337		68	66	69	134
24.8	529	508	515	476	378		78	69	65	144
24.82	525	485	475	492	326		64	53	77	142
24.84	515	495	440	472	330		83	52	53	155
24.86	524	492	467	430	320		68	45	63	152
24.88	497	509	480	475	362		49	46	63	132
24.9	446	480	469	514	358		62	70	62	134
24.92	530	504	468	475	346		80	58	60	131
24.94	500	486	478	448	333		78	49	55	142
24.96	548	478	453	439	356		80	41	66	148
24.98	475	462	488	472	345		74	57	48	123
25	470	489	468	476	319		75	41	61	131
25.02	485	467	510	405	328		67	50	63	137
25.04	480	511	458	484	298		82	36	61	120
25.06	499	488	454	485	323		71	57	57	146
25.08	473	470	475	477	357		78	52	57	131
25.1	451	507	488	437	379		72	50	65	138
25.12	473	486	497	478	307		80	45	62	134
25.14	462	499	479	436	305		67	55	60	128
25.16	460	510	469	440	311		76	50	60	124
25.18	496	456	482	483	320		69	53	46	118
25.2	521	472	462	462	303		74	58	55	117
25.22	503	470	469	445	355		61	34	72	133
25.24	474	473	459	447	298		84	46	69	128
25.26	450	477	444	433	332		62	51	61	128
25.28	449	496	453	422	314		51	54	63	116
25.3	453	491	456	419	343		65	53	60	149
25.32	446	469	462	459	324		76	47	48	134
25.34	435	510	454	478	294		76	48	59	140
25.36	454	469	465	419	344		76	57	57	138
25.38	453	491	446	413	327		64	52	59	119
25.4	451	480	457	453	275		73	46	74	134
25.42	452	455	495	438	330		68	45	69	123
25.44	424	488	482	462	308		76	46	48	143
25.46	457	464	483	446	300		64	44	43	127
25.48	428	504	527	426	306		50	37	54	131
25.5	463	507	483	423	300		68	47	59	110
25.52	427	512	510	423	292		58	38	65	120
25.54	426	485	564	417	321		66	40	64	129
25.56	443	459	517	411	303		60	38	59	133
25.58	448	492	577	426	351		61	41	60	115
25.6	425	513	575	398	279		59	59	55	121
25.62	458	498	589	410	335		64	41	64	110
25.64	421	473	616	425	330		62	46	49	111
25.66	430	473	561	450	328		60	51	54	132
25.68	405	493	543	417	340		64	40	46	110
25.7	439	499	516	415	307		73	51	61	123
25.72	424	520	487	427	298		60	51	53	119
25.74	449	520	498	420	309		88	42	62	116
25.76	425	489	414	453	304		57	38	56	115
25.78	416	519	458	426	315		68	42	70	121
25.8	426	506	459	416	292		63	43	63	112
25.82	432	537	418	438	291		60	58	62	114
25.84	463	486	436	403	287		70	57	65	122
25.86	440	509	462	434	294		61	45	77	103
25.88	423	501	466	443	307		72	45	60	132
25.9	414	504	416	422	324		68	47	43	95
25.92	455	498	447	384	305		60	47	40	122
25.94	415	515	458	422	326		57	45	52	118
25.96	440	472	467	442	311		56	33	55	138
25.98	424	469	387	421	324		66	51	46	107
26	429	493	389	419	296		64	38	48	119
26.02	395	472	395	445	326		74	54	66	112
26.04	414	469	426	434	301		60	41	47	112
26.06	407	439	413	454	327		54	53	51	106
26.08	404	472	420	410	284		68	47	53	113
26.1	409	432	403	429	275		64	37	53	117
26.12	422	454	407	420	314		63	43	56	110
26.14	404	434	417	463	290		59	45	52	99
26.16	425	433	390	439	291		58	57	57	111
26.18	389	444	396	411	333		53	48	59	130
26.2	407	424	423	408	313		60	53	60	109
26.22	420	486	429	438	311		65	45	58	118
26.24	394	475	418	435	272		40	41	56	102
26.26	410	430	428	431	324		53	51	50	118
26.28	397	444	435	414	284		49	34	66	101
26.3	417	452	460	407	314		54	33	55	103
26.32	421	444	414	438	299		60	38	59	99
26.34	392	462	449	425	299		62	46	52	110
26.36	450	486	438	425	298		63	41	64	101
26.38	384	455	442	411	270		62	42	56	116
26.4	395	501	446	461	296		66	38	63	106
26.42	413	440	446	434	272		58	26	62	105
26.44	393	472	434	409	303		63	31	50	106
26.46	419	446	409	437	314		56	42	52	98
26.48	387	462	443	474	330		43	42	56	100
26.5	386	406	455	423	276		51	32	58	116
26.52	400	503	405	433	333		61	34	43	115
26.54	412	476	400	445	302		51	46	55	131
26.56	402	485	407	424	300		47	33	43	114
26.58	377	489	418	450	285		54	38	67	109
26.6	398	485	382	476	289		44	36	49	119
26.62	399	519	409	499	293		44	53	61	103
26.64	373	521	411	518	300		58	37	55	105
26.66	403	488	407	535	294		60	48	57	107
26.68	335	487	408	611	261		42	37	53	105
26.7	337	501	410	642	274		58	37	62	94
26.72	359	488	377	701	267		55	39	54	104
26.74	397	504	404	833	294		56	38	57	129
26.76	384	495	385	842	257		60	53	52	108
26.78	398	490	437	886	270		54	52	58	105
26.8	384	493	396	802	243		51	40	54	111
26.82	399	496	434	740	288		53	60	61	102
26.84	349	467	419	728	264		48	38	53	121
26.86	399	477	405	674	252		36	37	50	114
26.88	397	465	381	615	266		56	35	47	102
26.9	381	503	417	575	284		50	54	52	95
26.92	353	459	350	497	269		51	28	42	111
26.94	377	462	394	437	288		62	44	38	95
26.96	382	472	423	425	259		62	49	41	95
26.98	393	452	405	452	272		40	42	48	117
27	358	435	400	474	300		54	50	52	85
27.02	399	458	351	460	281		44	33	59	100
27.04	393	413	363	452	247		54	30	41	101
27.06	384	449	421	393	257		51	54	61	103
27.08	352	385	390	380	262		53	42	52	105
27.1	350	418	394	399	265		53	41	57	112
27.12	389	427	383	430	267		49	28	55	91
27.14	394	426	435	379	247		51	49	51	108
27.16	366	425	390	386	272		66	50	57	119
27.18	361	420	379	361	273		54	41	51	105
27.2	352	452	370	396	273		63	44	41	113
27.22	392	404	398	372	263		46	33	44	100
27.24	368	398	428	375	268		57	41	53	103
27.26	357	390	393	381	248		46	42	53	113
27.28	403	423	373	388	280		51	33	56	107
27.3	348	386	362	369	266		67	47	45	97
27.32	308	415	387	366	261		50	43	51	105
27.34	371	421	382	384	237		41	41	50	100
27.36	395	409	382	401	259		56	38	47	115
27.38	340	391	350	367	282		63	36	63	97
27.4	355	392	345	369	291		53	44	50	107
27.42	351	380	340	372	264		59	35	55	98
27.44	343	395	392	347	246		50	46	73	113
27.46	354	406	383	381	263		65	50	56	105
27.48	342	374	373	403	271		62	55	43	114
27.5	366	410	355	414	256		59	45	56	104
27.52	366	445	373	414	243		60	40	43	87
27.54	336	415	385	329	239		47	37	44	102
27.56	361	399	359	387	263		54	55	57	116
27.58	371	391	365	372	249		55	42	69	86
27.6	343	405	350	435	250		64	48	52	108
27.62	337	388	378	364	267		48	41	54	101
27.64	335	361	353	367	271		43	36	53	96
27.66	336	370	406	407	259		45	40	57	106
27.68	348	381	390	403	251		61	39	40	108
27.7	334	387	380	387	262		57	33	48	84
27.72	356	385	359	392	264		57	44	53	104
27.74	362	396	385	436	252		47	42	49	110
27.76	314	400	357	413	257		53	49	27	127
27.78	378	350	368	456	236		63	35	46	112
27.8	355	396	393	388	266		49	39	57	99
27.82	316	378	337	423	275		51	51	55	123
27.84	340	372	398	432	266		59	42	54	102
27.86	378	396	371	398	269		57	42	64	105
27.88	349	405	381	378	259		58	29	43	109
27.9	338	374	367	399	233		50	47	43	99
27.92	341	389	338	422	248		51	35	50	100
27.94	358	373	367	361	245		53	34	45	89
27.96	342	406	403	368	247		60	34	53	95
27.98	357	388	393	374	263		62	30	40	101
28	356	374	327	366	250		50	42	46	91
28.02	328	371	380	332	255		55	35	56	85
28.04	338	346	410	370	225		37	33	40	98
28.06	377	367	353	381	247		57	39	51	90
28.08	371	363	383	398	243		53	30	42	84
28.1	375	392	347	375	274		41	33	53	105
28.12	366	347	428	349	221		57	44	54	96
28.14	369	406	360	382	243		42	45	45	99
28.16	353	401	391	345	244		50	41	32	98
28.18	361	385	412	335	240		57	45	62	94
28.2	387	368	432	333	228		60	36	46	103
28.22	322	402	424	336	249		48	37	52	95
28.24	360	385	409	361	273		41	31	38	96
28.26	339	397	411	361	254		51	44	37	88
28.28	339	400	398	365	261		43	37	52	107
28.3	353	379	393	395	253		43	29	55	114
28.32	317	395	373	335	240		44	33	46	94
28.34	360	346	374	358	276		42	43	36	105
28.36	346	370	377	353	246		53	35	46	102
28.38	330	381	360	324	245		56	42	45	85
28.4	361	379	337	345	236		53	33	48	110
28.42	361	346	341	347	210		60	34	37	114
28.44	360	374	360	365	224		62	32	40	92
28.46	341	355	366	366	271		39	37	46	100
28.48	341	377	354	372	247		49	39	59	92
28.5	318	356	384	338	237		54	37	51	105
28.52	363	353	358	341	261		53	47	38	87
28.54	356	383	406	350	250		58	36	49	90
28.56	346	387	427	342	242		59	35	42	118
28.58	321	372	394	384	254		45	49	53	99
28.6	312	340	387	340	249		43	41	41	97
28.62	359	344	381	349	211		53	39	60	99
28.64	329	393	438	344	238		48	47	49	109
28.66	344	351	418	352	238		54	38	60	100
28.68	356	332	391	361	239		51	53	46	97
28.7	294	358	392	376	234		47	33	70	102
28.72	337	362	407	363	229		65	38	48	95
28.74	345	355	418	381	252		57	39	70	100
28.76	319	373	419	381	223		49	48	62	102
28.78	373	347	397	352	254		46	52	50	101
28.8	322	357	362	332	237		72	49	70	107
28.82	304	354	382	364	243		73	47	65	103
28.84	339	340	351	378	230		51	58	62	116
28.86	313	332	360	346	249		60	52	65	132
28.88	324	328	338	366	220		62	58	79	111
28.9	336	358	337	336	242		66	57	78	133
28.92	319	356	382	344	249		77	62	78	131
28.94	310	362	397	319	236		74	52	71	138
28.96	349	354	411	378	193		70	60	65	114
28.98	322	331	371	357	251		74	46	70	138
29	343	318	405	327	244		73	56	59	147
29.02	317	333	424	348	251		64	37	64	140
29.04	338	366	396	338	240		66	49	65	156
29.06	355	347	383	301	227		80	37	60	148
29.08	307	385	393	337	200		63	49	53	151
29.1	338	368	392	327	252		73	44	66	142
29.12	359	321	356	340	234		61	42	69	156
29.14	300	342	322	330	217		74	56	69	134
29.16	344	327	365	315	224		67	39	51	142
29.18	323	317	338	303	249		74	46	58	144
29.2	347	354	366	302	258		56	47	65	159
29.22	315	348	346	345	226		68	51	65	113
29.24	342	355	354	314	189		77	54	55	137
29.26	323	343	353	341	253		56	41	63	160
29.28	314	386	354	381	238		55	38	63	139
29.3	344	347	353	344	250		70	54	55	145
29.32	336	379	346	356	230		74	43	56	147
29.34	328	330	342	364	243		51	38	53	126
29.36	304	369	386	370	206		58	43	55	119
29.38	306	339	428	339	200		76	28	58	140
29.4	316	342	393	344	200		51	44	63	132
29.42	323	349	414	330	213		69	42	68	104
29.44	330	364	360	333	242		76	52	58	113
29.46	319	376	369	323	217		47	54	58	132
29.48	346	348	404	343	249		52	49	52	136
29.5	318	376	350	324	231		69	43	69	144
29.52	341	346	371	374	225		60	45	47	116
29.54	331	348	322	336	229		76	34	51	112
29.56	337	353	335	348	236		72	34	42	125
29.58	349	362	344	314	210		60	34	64	113
29.6	318	356	382	331	229		52	46	50	138
29.62	338	331	343	344	208		62	35	48	121
29.64	339	360	336	327	234		53	42	52	109
29.66	319	366	323	355	231		61	50	55	118
29.68	329	364	331	327	225		70	29	45	121
29.7	357	314	319	321	232		53	37	49	113
29.72	351	374	333	363	219		53	33	58	108
29.74	357	329	298	335	229		41	51	37	92
29.76	381	397	362	319	229		59	32	46	98
29.78	303	368	315	364	257		50	41	44	110
29.8	361	381	321	301	209		49	38	56	105
29.82	378	337	371	307	228		54	40	42	96
29.84	333	347	353	307	208		42	34	48	104
29.86	403	352	321	364	225		34	40	46	95
29.88	382	315	294	294	225		47	38	47	86
29.9	364	353	328	331	244		60	31	33	99
29.92	390	354	334	322	232		45	33	45	69
29.94	396	312	320	283	244		43	39	39	102
29.96	373	345	348	324	233		32	36	47	89
29.98	407	326	291	303	255		45	34	42	92
30	362	303	334	309	224		45	25	56	92
30.02	376	325	299	342	229		47	35	42	88
30.04	378	352	339	302	227		44	38	50	90
30.06	363	314	310	294	229		58	43	36	98
30.08	358	336	314	297	210		41	26	35	84
30.1	341	324	314	315	245		46	34	44	80
30.12	323	335	336	303	220		51	35	38	91
30.14	355	329	327	304	215		33	40	41	77
30.16	370	363	327	338	227		46	39	44	82
30.18	337	319	333	299	220		33	31	32	79
30.2	316	324	327	329	199		50	39	47	84
30.22	348	337	317	308	236		38	27	27	72
30.24	367	300	331	316	231		40	39	43	78
30.26	347	347	321	304	215		44	32	40	81
30.28	354	358	312	350	207		53	32	33	91
30.3	330	334	271	322	185		42	37	35	92
30.32	358	317	357	330	198		38	29	47	94
30.34	305	356	341	315	211		50	14	45	95
30.36	302	340	357	312	204		47	34	32	84
30.38	335	333	365	289	210		45	33	35	80
30.4	320	316	352	330	191		37	33	44	64
30.42	324	312	366	312	240		40	32	38	83
30.44	338	331	322	313	205		50	28	33	104
30.46	310	321	337	314	217		46	28	46	84
30.48	330	358	354	302	233		29	27	39	94
30.5	312	323	332	283	218		57	31	45	85
30.52	314	292	336	302	211		33	30	44	88
30.54	334	351	333	330	211		46	25	36	105
30.56	338	301	365	360	232		40	38	42	98
30.58	345	348	336	301	222		35	39	43	101
30.6	317	314	414	328	214		49	32	48	91
30.62	298	317	372	317	230		54	35	50	100
30.64	304	321	354	344	218		30	25	34	77
30.66	293	311	351	312	226		45	33	42	82
30.68	284	353	388	347	211		43	27	37	71
30.7	296	311	357	326	218		51	36	37	95
30.72	289	334	379	341	214		37	34	43	75
30.74	277	327	333	352	214		53	31	42	93
30.76	298	331	355	315	198		41	39	36	96
30.78	310	341	330	273	196		36	33	44	77
30.8	264	327	324	278	216		53	32	29	75
30.82	308	343	297	324	209		50	36	43	72
30.84	251	325	307	302	197		47	22	38	70
30.86	311	333	311	318	199		38	36	33	88
30.88	274	348	299	294	201		47	35	46	88
30.9	282	353	328	301	187		58	24	42	88
30.92	311	342	312	320	209		39	31	41	90
30.94	299	317	299	288	196		37	36	39	91
30.96	280	336	278	308	203		50	34	24	94
30.98	284	341	308	311	214		38	41	49	87
31	291	322	277	287	227		42	35	37	98
31.02	263	341	284	281	221		43	35	32	106
31.04	292	336	291	287	236		45	30	42	74
31.06	295	314	285	293	220		33	39	44	84
31.08	269	348	289	299	210		40	36	45	77
31.1	275	305	267	301	213		42	41	41	93
31.12	282	330	321	311	226		43	26	39	91
31.14	281	307	282	305	205		49	33	42	87
31.16	277	308	308	266	223		39	34	43	87
31.18	301	312	299	307	204		51	32	40	62
31.2	299	317	318	306	191		42	40	38	87
31.22	246	312	298	264	217		43	27	28	83
31.24	288	316	318	294	230		30	23	54	80
31.26	260	319	288	300	227		57	36	31	75
31.28	286	305	311	300	217		56	38	31	87
31.3	265	312	320	302	229		39	26	26	81
31.32	267	314	328	331	187		37	24	41	65
31.34	282	315	347	280	232		49	35	36	100
31.36	290	307	334	282	210		37	33	41	84
31.38	270	311	299	279	214		44	32	37	89
31.4	295	320	311	281	187		57	22	40	74
31.42	260	357	285	301	190		32	36	28	91
31.44	254	314	306	296	209		34	29	34	87
31.46	257	284	291	305	206		52	31	43	77
31.48	249	303	299	281	188		36	20	40	70
31.5	288	304	281	299	210		51	35	37	75
31.52	256	285	299	315	187		35	29	34	61
31.54	273	338	300	310	205		30	43	31	75
31.56	271	339	306	304	192		44	40	32	87
31.58	301	311	335	301	198		52	32	38	86
31.6	240	273	274	276	201		47	35	38	69
31.62	302	310	292	314	225		45	30	36	71
31.64	269	293	292	326	210		33	20	34	75
31.66	290	330	259	307	226		43	30	30	77
31.68	265	308	295	316	240		34	37	45	78
31.7	301	301	292	306	214		47	32	39	91
31.72	279	307	272	317	229		45	26	34	57
31.74	257	305	276	311	211		41	43	32	75
31.76	280	288	276	286	195		36	17	37	62
31.78	264	334	313	311	198		47	19	41	70
31.8	259	298	292	284	225		39	23	39	64
31.82	258	323	318	301	199		43	28	34	88
31.84	258	307	289	309	213		27	32	33	82
31.86	270	310	281	328	167		47	40	38	67
31.88	249	308	293	319	199		40	36	41	82
31.9	251	322	274	312	197		48	34	44	74
31.92	273	340	309	306	200		43	28	47	86
31.94	263	322	324	274	221		48	35	36	62
31.96	271	345	319	310	194		44	34	34	76
31.98	285	310	307	317	195		40	36	44	65
32	290	327	282	302	199		35	30	24	77
32.02	263	301	309	302	206		52	28	42	68
32.04	235	307	293	283	173		43	33	38	63
32.06	254	330	290	320	180		35	29	34	60
32.08	273	338	292	290	182		32	37	36	76
32.1	248	296	278	305	186		39	26	39	74
32.12	258	333	279	332	178		45	27	30	69
32.14	259	306	290	317	196		39	25	38	75
32.16	282	289	282	310	200		43	25	33	64
32.18	245	321	328	289	182		41	39	31	69
32.2	235	303	264	309	180		43	32	33	80
32.22	260	317	299	349	173		40	30	29	68
32.24	254	325	279	322	167		57	37	30	74
32.26	262	309	276	300	188		39	29	37	75
32.28	249	306	310	286	179		41	27	34	77
32.3	267	303	287	307	170		26	33	44	77
32.32	262	324	284	315	192		37	17	41	75
32.34	251	307	265	264	209		39	23	35	66
32.36	247	320	287	289	202		41	38	38	95
32.38	251	312	293	269	205		42	38	30	66
32.4	250	354	300	267	187		41	33	31	88
32.42	273	309	296	269	200		36	34	36	78
32.44	230	338	257	300	210		46	30	24	87
32.46	258	308	296	260	185		39	32	40	90
32.48	261	327	333	275	178		39	26	37	58
32.5	280	306	332	254	187		32	31	47	84
32.52	247	334	314	274	184		54	26	31	87
32.54	274	316	322	278	199		39	29	29	71
32.56	282	310	335	255	184		40	35	30	80
32.58	276	315	325	281	197		27	34	45	69
32.6	238	324	297	268	180		38	36	34	88
32.62	236	312	290	239	200		44	38	38	72
32.64	248	308	317	312	188		50	33	33	79
32.66	280	299	273	248	186		42	32	30	77
32.68	245	304	301	279	183		46	30	37	77
32.7	244	331	258	290	174		41	31	45	89
32.72	236	297	283	261	186		40	32	36	66
32.74	251	307	294	258	167		46	30	29	85
32.76	246	272	303	260	199		34	37	33	90
32.78	260	265	265	267	178		47	21	37	85
32.8	249	311	277	236	206		37	34	46	80
32.82	241	294	252	257	204		40	31	39	72
32.84	245	294	265	261	188		44	34	44	78
32.86	229	303	281	306	212		41	32	37	84
32.88	268	294	296	250	203		29	34	34	74
32.9	254	280	269	304	185		39	30	32	69
32.92	237	277	282	272	186		41	28	29	87
32.94	248	273	278	272	189		50	28	48	80
32.96	248	255	262	289	179		43	30	35	85
32.98	250	288	278	256	178		58	33	48	79
33	246	305	291	290	186		41	37	32	86
33.02	238	271	279	283	174		46	28	40	79
33.04	261	269	291	288	174		43	35	39	79
33.06	256	284	294	264	179		42	21	33	73
33.08	254	288	272	267	162		40	34	37	74
33.1	251	297	267	268	200		39	32	39	87
33.12	242	279	298	277	173		47	28	34	75
33.14	236	307	274	289	190		39	31	42	68
33.16	223	278	273	254	188		40	31	25	92
33.18	244	297	273	251	176		34	39	36	77
33.2	255	274	291	244	193		34	34	44	70
33.22	222	266	270	251	170		47	15	40	76
33.24	263	281	272	270	179		31	33	25	78
33.26	238	340	254	245	157		44	28	32	77
33.28	247	276	269	230	172		47	34	45	82
33.3	267	291	252	236	215		32	18	42	72
33.32	221	297	271	237	193		43	26	40	80
33.34	226	299	288	254	181		36	21	33	62
33.36	252	281	259	253	158		30	28	38	79
33.38	242	315	281	251	190		59	27	35	78
33.4	256	286	248	271	161		42	22	32	77
33.42	266	266	274	247	174		32	22	29	60
33.44	233	293	254	271	199		43	35	36	65
33.46	230	244	277	284	167		26	24	29	81
33.48	229	282	283	241	188		29	32	34	65
33.5	241	284	268	295	195		33	31	29	77
33.52	255	259	301	252	203		45	26	27	74
33.54	239	294	257	284	189		51	25	42	92
33.56	217	283	291	272	170		41	29	47	78
33.58	233	290	241	267	176		39	26	31	64
33.6	221	269	266	264	180		39	23	31	77
33.62	252	271	264	282	178		40	27	37	81
33.64	238	264	256	281	183		37	26	31	81
33.66	252	268	260	280	188		41	27	33	78
33.68	244	258	284	270	211		40	18	37	83
33.7	228	269	227	271	183		25	29	29	72
33.72	254	284	261	268	172		32	30	35	73
33.74	230	281	270	264	185		47	28	33	67
33.76	230	305	273	244	202		45	37	35	91
33.78	246	264	264	270	178		35	28	31	80
33.8	251	276	277	300	183		40	24	45	72
33.82	218	265	264	262	154		45	35	29	77
33.84	242	273	254	269	182		42	31	35	62
33.86	274	275	249	274	177		47	32	40	96
33.88	220	280	269	258	188		38	25	45	87
33.9	236	266	280	253	182		44	30	42	62
33.92	240	253	273	285	189		31	38	28	77
33.94	253	303	238	239	186		37	32	37	66
33.96	223	286	253	274	182		37	35	40	77
33.98	205	256	253	299	178		38	27	23	78
34	229	250	277	275	194		38	30	40	83
34.02	230	256	274	282	152		34	18	40	75
34.04	218	272	253	241	176		46	24	35	61
34.06	248	295	258	250	191		43	29	32	72
34.08	285	271	260	254	187		44	31	27	73
34.1	245	260	265	279	170		32	34	19	65
34.12	238	273	286	247	181		39	24	34	71
34.14	246	261	268	251	176		28	35	44	66
34.16	220	293	269	288	171		32	30	35	64
34.18	252	255	258	259	173		35	32	37	69
34.2	246	290	247	233	182		38	29	28	63
34.22	226	248	257	267	186		26	38	40	65
34.24	245	253	236	275	165		40	25	34	75
34.26	253	272	262	260	177		45	31	33	80
34.28	248	274	257	240	166		33	34	30	72
34.3	223	252	280	237	169		44	36	39	72
34.32	203	294	248	267	164		36	33	30	58
34.34	245	257	265	266	209		32	30	36	78
34.36	220	275	242	262	184		27	34	35	65
34.38	249	277	252	242	174		36	27	39	59
34.4	235	274	244	246	173		39	32	36	61
34.42	212	258	281	251	168		40	27	29	65
34.44	250	263	255	289	161		38	29	34	77
34.46	239	281	269	252	177		48	23	38	70
34.48	208	254	251	237	194		24	42	40	75
34.5	239	235	245	265	157		49	33	40	66
34.52	262	290	248	246	176		38	25	36	79
34.54	210	267	270	233	157		38	33	38	77
34.56	210	272	257	270	181		38	26	32	71
34.58	241	266	267	256	199		43	23	34	71
34.6	234	247	299	251	184		35	32	25	78
34.62	229	260	246	216	166		40	27	40	75
34.64	236	223	277	216	181		46	27	37	69
34.66	209	269	274	264	168		33	31	34	68
34.68	221	244	277	257	174		45	27	32	74
34.7	211	274	231	249	154		36	23	39	73
34.72	229	246	260	257	198		53	25	50	69
34.74	199	269	252	243	163		40	33	40	72
34.76	263	252	261	269	179		40	33	37	71
34.78	236	258	252	251	171		32	33	37	77
34.8	248	253	261	248	194		28	27	35	80
34.82	246	267	269	238	168		40	37	38	67
34.84	240	269	304	231	196		55	30	36	48
34.86	206	232	242	258	157		36	28	35	71
34.88	209	257	273	241	183		54	32	41	77
34.9	242	231	260	258	178		44	24	32	72
34.92	248	248	279	242	181		39	34	34	72
34.94	241	263	323	260	160		45	39	42	82
34.96	217	238	294	250	176		38	27	63	80
34.98	196	227	283	219	184		43	33	39	91
35	206	236	290	253	166		41	36	35	86
35.02	240	245	328	230	167		41	28	34	78
35.04	232	240	343	249	148		48	30	32	87
35.06	243	254	312	252	188		46	38	46	101
35.08	225	242	345	268	156		50	44	42	84
35.1	219	281	282	264	165		51	36	52	69
35.12	218	252	284	266	179		55	42	38	87
35.14	220	284	321	229	183		52	34	49	90
35.16	250	242	314	241	151		48	46	48	77
35.18	237	222	274	228	145		44	32	40	93
35.2	267	254	286	246	166		53	44	43	97
35.22	233	235	257	258	160		36	47	47	95
35.24	201	260	245	262	178		51	46	56	108
35.26	239	227	240	230	178		61	40	44	104
35.28	222	252	223	238	160		57	41	46	106
35.3	209	251	222	239	188		49	43	33	80
35.32	247	233	237	254	163		49	38	64	113
35.34	232	242	235	255	163		43	44	52	97
35.36	241	234	264	266	157		50	47	43	93
35.38	204	255	235	263	156		58	42	42	94
35.4	212	244	227	264	139		40	43	47	85
35.42	196	232	257	256	173		53	44	32	111
35.44	230	261	264	250	147		54	32	48	83
35.46	215	261	244	258	162		53	39	43	121
35.48	207	264	226	225	147		59	41	45	111
35.5	223	226	247	251	179		55	43	53	94
35.52	241	246	223	244	165		65	45	48	108
35.54	233	265	241	276	160		37	35	45	105
35.56	199	238	236	240	164		45	31	52	104
35.58	200	232	234	247	144		53	34	45	108
35.6	217	215	248	255	155		68	36	42	88
35.62	238	228	255	253	167		63	42	52	102
35.64	237	250	229	233	154		61	52	47	123
35.66	227	241	250	239	159		47	38	37	99
35.68	229	249	260	238	157		53	32	44	120
35.7	224	225	239	241	135		51	43	42	103
35.72	211	260	270	267	163		61	26	53	91
35.74	239	264	260	250	161		51	33	48	77
35.76	213	234	237	235	180		53	39	45	98
35.78	212	259	272	263	169		48	36	38	86
35.8	212	233	257	224	159		49	31	43	90
35.82	212	234	242	257	176		43	32	50	93
35.84	242	240	237	235	154		48	30	41	79
35.86	225	244	255	242	168		38	28	33	103
35.88	250	266	252	275	138		40	40	42	113
35.9	249	258	256	250	162		44	33	39	91
35.92	251	231	254	203	154		49	30	32	110
35.94	247	264	268	240	173		40	35	47	102
35.96	243	242	263	232	135		51	33	33	102
35.98	233	283	295	267	157		39	43	34	90
36	248	254	271	259	142		35	28	34	91
36.02	258	210	262	259	165		46	32	37	95
36.04	230	221	231	289	172		21	31	56	82
36.06	247	218	260	260	160		42	32	42	80
36.08	274	213	262	295	159		40	38	35	88
36.1	244	236	243	290	159		35	40	43	82
36.12	267	240	256	281	155		37	33	29	92
36.14	248	235	234	287	148		37	31	31	87
36.16	214	242	244	290	157		46	33	47	103
36.18	231	235	257	261	177		35	26	37	79
36.2	241	233	220	270	141		40	26	35	79
36.22	260	243	211	253	154		41	22	41	89
36.24	242	234	229	234	151		42	35	32	93
36.26	256	243	235	269	153		42	34	38	89
36.28	263	228	250	251	152		42	26	38	95
36.3	255	266	226	269	146		47	41	38	85
36.32	245	236	247	276	148		39	24	35	84
36.34	259	241	225	241	151		44	26	33	89
36.36	245	253	225	244	175		43	22	31	81
36.38	261	243	237	267	154		31	32	30	109
36.4	215	222	233	262	146		47	23	40	80
36.42	239	219	232	283	160		34	24	46	72
36.44	277	219	229	238	184		35	30	45	85
36.46	243	216	213	256	149		48	33	32	77
36.48	238	224	234	265	139		38	23	36	69
36.5	249	227	241	293	157		37	38	38	71
36.52	245	233	230	280	151		53	31	38	107
36.54	266	232	220	273	168		42	36	30	94
36.56	240	237	234	276	151		36	34	32	63
36.58	232	247	220	248	145		39	29	44	74
36.6	253	230	248	281	157		40	39	29	79
36.62	250	196	239	253	165		40	36	34	79
36.64	217	254	220	234	159		45	33	36	90
36.66	233	213	217	241	141		32	30	48	93
36.68	237	227	263	206	137		35	19	37	84
36.7	214	230	239	227	156		48	30	33	84
36.72	214	234	227	236	171		50	35	48	65
36.74	221	228	211	252	144		34	35	33	70
36.76	228	239	248	215	160		49	30	37	54
36.78	230	237	225	247	150		49	35	38	72
36.8	259	234	277	225	172		56	24	35	85
36.82	200	258	228	210	163		44	37	39	91
36.84	255	243	252	236	146		31	29	27	76
36.86	234	247	216	220	142		48	33	46	69
36.88	231	233	250	229	155		47	26	32	67
36.9	231	220	234	235	153		39	25	40	80
36.92	215	239	230	243	159		34	29	42	96
36.94	235	232	251	228	152		35	24	29	101
36.96	216	219	249	213	131		35	37	42	75
36.98	226	247	238	226	128		38	40	39	77
37	226	199	257	235	123		42	37	36	78
37.02	230	215	269	215	170		59	35	36	86
37.04	214	260	249	239	154		42	40	34	78
37.06	230	221	258	199	143		57	42	52	75
37.08	243	214	264	213	155		44	28	41	77
37.1	220	251	229	227	146		43	36	30	87
37.12	218	220	269	231	158		43	35	42	80
37.14	203	244	224	203	137		51	38	50	100
37.16	237	233	230	236	145		49	37	52	92
37.18	198	226	240	218	140		42	32	48	103
37.2	207	234	256	206	169		50	37	46	64
37.22	246	212	267	223	147		50	45	23	94
37.24	212	256	249	210	150		41	38	36	99
37.26	215	225	243	206	140		37	45	46	88
37.28	223	274	254	234	150		36	38	40	97
37.3	244	219	232	217	121		48	53	44	95
37.32	246	207	242	209	146		43	30	41	68
37.34	210	224	220	213	137		45	42	52	90
37.36	211	210	202	212	133		50	42	43	112
37.38	192	225	267	243	143		43	37	50	88
37.4	219	210	227	204	156		49	36	49	93
37.42	238	225	224	199	170		44	37	55	98
37.44	229	213	235	232	150		42	33	45	83
37.46	213	218	241	208	150		57	41	50	113
37.48	223	247	238	210	132		40	45	51	108
37.5	216	242	238	233	161		45	40	52	82
37.52	203	229	229	202	141		46	40	56	101
37.54	196	249	211	219	142		52	46	52	105
37.56	224	197	248	227	147		48	43	43	122
37.58	196	215	209	208	129		46	41	49	128
37.6	199	231	213	220	136		57	50	52	119
37.62	205	213	246	221	137		57	32	58	102
37.64	202	228	216	202	130		45	36	51	116
37.66	194	239	248	234	157		53	39	29	110
37.68	205	219	222	250	142		43	42	38	104
37.7	204	212	210	225	142		62	47	44	107
37.72	214	231	228	228	137		47	42	36	114
37.74	187	220	209	243	155		46	36	40	109
37.76	204	229	214	242	139		61	32	46	91
37.78	204	183	239	210	143		50	42	54	101
37.8	251	231	208	230	154		44	41	42	109
37.82	215	208	226	240	136		49	31	55	114
37.84	230	209	219	237	137		64	30	50	119
37.86	206	217	205	242	156		51	43	43	106
37.88	204	249	217	216	132		43	45	33	118
37.9	202	226	197	247	139		48	45	60	117
37.92	219	203	233	222	158		50	33	56	108
37.94	210	216	235	233	140		61	38	47	109
37.96	222	214	255	222	133		47	28	55	84
37.98	188	217	230	230	135		44	30	45	80
38	225	226	251	214	151		47	45	54	91
38.02	208	215	261	188	169		40	39	42	93
38.04	207	237	243	193	165		53	41	44	101
38.06	208	215	258	226	149		41	32	41	90
38.08	210	209	285	217	120		35	36	41	103
38.1	222	241	271	201	137		40	41	50	90
38.12	218	241	251	213	133		43	42	37	77
38.14	192	225	221	199	147		54	33	40	96
38.16	220	204	249	209	133		42	34	39	90
38.18	227	223	218	224	160		50	36	40	94
38.2	223	211	242	222	134		51	35	42	98
38.22	211	236	232	235	158		46	48	42	82
38.24	221	225	248	204	151		45	37	43	92
38.26	220	202	215	240	169		41	40	31	100
38.28	226	234	239	213	154		34	34	35	95
38.3	213	228	200	225	131		40	39	35	89
38.32	231	215	232	230	146		48	31	42	101
38.34	244	250	246	194	153		40	31	45	107
38.36	257	218	211	203	147		42	38	49	101
38.38	231	207	212	215	152		30	30	40	109
38.4	241	237	212	240	147		43	38	40	95
38.42	208	233	261	217	158		35	27	39	95
38.44	221	235	230	204	139		36	42	40	92
38.46	241	211	215	243	143		52	21	38	86
38.48	251	209	219	195	116		44	41	37	90
38.5	261	218	198	213	143		39	43	34	95
38.52	226	221	207	206	137		45	29	33	107
38.54	209	237	217	213	143		45	37	43	88
38.56	257	223	195	253	142		39	40	40	103
38.58	222	242	238	188	147		39	44	36	96
38.6	218	244	208	224	158		39	35	54	99
38.62	241	206	208	223	154		38	46	42	93
38.64	260	212	232	207	136		41	37	45	98
38.66	218	220	243	203	138		37	30	49	91
38.68	256	210	236	206	159		33	40	47	83
38.7	238	199	224	207	144		47	41	40	96
38.72	238	222	225	197	122		39	39	49	107
38.74	248	201	214	223	118		48	31	39	96
38.76	230	223	231	236	131		49	45	33	87
38.78	229	217	236	221	132		34	26	36	78
38.8	210	235	221	229	121		43	28	47	101
38.82	206	232	220	197	167		37	36	35	106
38.84	233	217	213	200	143		37	40	46	89
38.86	214	220	233	233	131		39	44	38	85
38.88	259	254	215	227	130		52	34	36	94
38.9	234	243	222	230	126		49	29	55	87
38.92	211	222	215	242	145		40	42	43	91
38.94	257	218	222	238	149		43	35	37	75
38.96	246	244	198	234	138		44	40	45	89
38.98	224	252	219	234	140		49	34	45	86
39	227	210	206	262	138		37	41	36	85
39.02	231	231	198	246	154		45	41	42	101
39.04	220	199	235	225	122		45	42	57	102
39.06	238	223	219	249	125		43	25	46	82
39.08	210	200	242	233	172		43	40	43	94
39.1	226	224	240	228	154		49	35	43	95
39.12	228	231	218	242	151		41	44	41	106
39.14	227	221	198	223	113		47	51	54	113
39.16	226	200	222	220	155		39	46	31	101
39.18	242	222	219	202	160		50	35	39	104
39.2	215	241	223	226	127		58	46	43	109
39.22	215	238	225	220	128		44	48	55	115
39.24	208	212	211	219	156		47	57	41	94
39.26	216	219	189	224	132		52	46	64	92
39.28	230	212	206	191	152		53	62	52	111
39.3	251	209	215	204	136		48	48	53	104
39.32	226	234	227	219	146		55	45	50	111
39.34	227	215	223	230	146		54	54	56	107
39.36	229	231	244	188	152		60	50	69	113
39.38	238	234	220	204	154		57	62	70	105
39.4	223	219	227	196	151		66	51	60	105
39.42	217	195	204	224	118		64	58	72	129
39.44	208	222	235	234	138		57	48	59	114
39.46	214	197	205	200	152		62	64	68	130
39.48	209	193	224	206	148		56	53	58	133
39.5	215	203	220	217	139		55	62	75	105
39.52	210	231	201	208	152		49	46	68	143
39.54	211	214	237	198	120		65	47	68	132
39.56	226	218	223	217	134		54	54	60	139
39.58	196	205	214	214	127		79	51	62	129
39.6	203	199	198	206	140		67	53	40	139
39.62	215	213	225	214	129		65	47	56	129
39.64	223	242	218	187	143		63	53	72	131
39.66	189	220	236	216	142		60	55	63	136
39.68	242	241	203	216	142		68	46	88	114
39.7	206	219	209	229	148		84	34	54	144
39.72	242	231	196	224	142		65	55	56	133
39.74	241	204	215	231	133		71	55	50	144
39.76	233	223	200	208	123		66	48	47	121
39.78	223	225	226	222	150		56	43	50	143
39.8	206	215	218	219	164		60	53	62	120
39.82	234	245	200	229	155		63	51	49	142
39.84	193	235	218	231	142		48	41	65	133
39.86	225	255	219	234	133		66	48	51	111
39.88	198	229	223	213	143		48	40	55	105
39.9	236	230	185	226	118		52	40	57	129
39.92	234	215	237	235	146		61	40	52	131
39.94	206	239	205	246	155		52	55	44	116
39.96	226	232	189	223	128		55	59	43	110
39.98	220	261	230	201	160		53	34	62	100
40	221	216	216	247	140		50	49	53	120
40.02	251	216	173	215	133		68	51	51	121
40.04	233	220	236	224	142		54	48	57	120
40.06	231	227	199	214	149		76	54	48	120
40.08	245	195	218	210	143		68	41	56	100
40.1	217	227	234	208	139		49	42	38	126
40.12	241	222	233	217	142		50	47	46	114
40.14	217	217	201	236	141		56	61	52	120
40.16	222	219	237	214	123		54	51	47	122
40.18	245	212	192	225	149		43	49	49	127
40.2	236	205	224	192	142		67	40	54	120
40.22	224	230	208	218	158		36	48	50	108
40.24	230	187	231	218	123		50	44	52	99
40.26	232	214	229	224	160		63	50	50	98
40.28	218	191	248	226	140		64	53	61	102
40.3	250	216	244	214	98		47	50	51	115
40.32	242	213	237	202	142		58	47	65	115
40.34	240	193	220	209	135		65	48	59	110
40.36	251	229	231	208	144		48	48	53	111
40.38	253	194	222	192	157		39	40	50	114
40.4	258	203	235	202	127		57	47	47	139
40.42	228	204	221	215	154		62	41	54	129
40.44	228	222	233	215	139		56	50	53	108
40.46	255	205	212	221	137		60	47	50	109
40.48	253	212	222	201	151		63	40	54	117
40.5	277	200	207	210	138		52	43	59	107
40.52	260	196	245	233	135		58	48	49	125
40.54	267	219	190	237	130		57	44	46	129
40.56	270	206	221	190	142		59	59	53	135
40.58	253	210	219	198	131		58	46	47	109
40.6	287	220	209	228	131		50	45	38	116
40.62	284	220	219	218	153		53	41	52	113
40.64	265	230	231	241	152		53	47	54	99
40.66	268	220	195	245	151		61	35	47	106
40.68	269	230	208	206	123		54	45	40	123
40.7	263	186	214	195	150		47	47	46	112
40.72	228	206	198	198	118		54	38	42	106
40.74	268	216	212	212	126		53	43	64	120
40.76	273	215	240	220	133		53	38	51	110
40.78	255	206	203	229	149		47	38	55	116
40.8	266	209	221	246	122		55	50	53	136
40.82	245	205	202	221	125		47	56	37	101
40.84	256	205	232	234	138		42	37	56	121
40.86	286	201	210	217	130		42	46	56	115
40.88	260	200	220	231	125		42	48	54	114
40.9	268	196	198	226	136		43	51	47	117
40.92	249	218	232	239	129		48	44	42	114
40.94	239	193	225	225	150		56	36	42	106
40.96	249	215	222	221	133		49	35	53	111
40.98	248	198	214	230	139		52	43	44	108
41	245	205	210	189	132		45	44	41	86
41.02	265	228	220	221	130		45	46	52	109
41.04	235	200	215	238	139		48	31	48	113
41.06	231	193	187	205	135		59	55	48	95
41.08	280	195	236	220	127		47	40	39	86
41.1	278	215	228	213	133		42	53	43	93
41.12	242	217	197	214	128		45	38	42	111
41.14	249	218	203	205	139		39	45	44	84
41.16	257	212	212	200	129		45	44	45	108
41.18	255	220	197	200	118		54	42	38	107
41.2	272	213	206	219	114		50	39	43	112
41.22	270	217	227	185	137		37	39	46	108
41.24	238	210	228	222	140		50	35	59	113
41.26	230	199	197	208	117		34	41	34	111
41.28	254	227	189	216	147		49	35	41	80
41.3	229	213	195	224	144		50	39	39	95
41.32	249	240	209	191	145		33	36	42	92
41.34	244	227	213	195	152		43	43	42	85
41.36	260	206	218	195	133		48	44	44	95
41.38	250	209	200	226	139		46	28	39	95
41.4	256	231	224	207	134		47	40	37	99
41.42	218	195	216	202	130		35	34	35	88
41.44	265	162	204	196	129		41	31	41	81
41.46	241	210	199	228	120		45	45	46	85
41.48	217	198	238	184	140		49	41	57	99
41.5	246	198	215	200	129		35	30	31	95
41.52	247	210	231	199	137		39	48	50	97
41.54	221	221	233	203	118		48	33	45	101
41.56	278	176	255	236	145		40	46	30	101
41.58	253	219	217	211	142		49	38	38	105
41.6	234	207	242	208	121		35	33	42	96
41.62	249	212	220	225	125		31	46	40	100
41.64	211	201	206	210	136		46	41	49	96
41.66	243	197	217	215	152		53	48	44	96
41.68	230	226	211	236	152		51	38	37	86
41.7	238	202	222	216	128		43	47	47	94
41.72	268	220	181	233	131		43	39	42	82
41.74	261	199	219	210	124		37	46	45	86
41.76	233	199	201	213	129		51	53	37	92
41.78	224	230	220	224	149		44	57	60	101
41.8	234	197	222	214	139		42	42	48	90
41.82	231	199	209	206	154		55	39	45	77
41.84	238	176	234	221	123		41	39	30	107
41.86	262	203	216	199	151		45	35	40	95
41.88	233	191	205	219	138		57	32	42	95
41.9	251	218	217	203	143		42	44	46	94
41.92	219	211	206	217	155		30	48	38	97
41.94	217	203	202	216	126		36	33	41	105
41.96	255	209	205	234	153		35	46	41	94
41.98	221	222	200	198	164		49	36	47	82
42	239	207	198	206	110		39	33	56	95
42.02	207	233	187	220	130		46	41	42	83
42.04	223	204	233	235	129		42	44	62	89
42.06	211	212	202	229	142		42	33	48	91
42.08	202	200	209	217	121		43	34	43	92
42.1	211	209	210	191	133		58	43	54	101
42.12	248	216	215	220	146		58	54	54	98
42.14	216	201	194	224	122		51	49	36	100
42.16	237	218	189	222	130		46	34	50	91
42.18	226	212	196	200	130		42	44	51	84
42.2	244	182	202	217	113		53	29	45	81
42.22	217	208	195	197	123		40	44	42	96
42.24	250	195	208	222	138		48	43	42	91
42.26	200	201	201	229	135		47	41	48	90
42.28	228	202	195	215	130		44	37	33	99
42.3	211	220	187	237	134		49	42	53	107
42.32	232	196	223	222	141		58	43	51	105
42.34	235	209	181	208	123		43	37	53	92
42.36	217	194	210	237	141		57	44	43	106
42.38	218	190	206	227	124		47	41	63	94
42.4	249	202	193	218	138		47	48	40	105
42.42	207	239	207	221	116		44	46	46	102
42.44	228	223	211	214	138		50	41	48	91
42.46	230	196	200	226	123		43	44	51	94
42.48	215	195	206	229	139		42	38	43	113
42.5	220	220	191	222	130		47	50	47	111
42.52	255	203	231	219	120		52	44	47	94
42.54	194	198	224	206	113		41	46	47	125
42.56	230	217	249	228	133		59	49	62	91
42.58	194	210	225	219	129		40	39	51	93
42.6	208	208	236	243	134		52	39	52	105
42.62	221	197	241	245	115		47	53	54	93
42.64	216	212	238	231	137		45	60	47	85
42.66	232	210	226	227	124		44	47	63	103
42.68	238	204	204	246	137		50	44	61	116
42.7	209	190	202	236	143		57	54	64	96
42.72	199	201	211	224	139		55	53	47	124
42.74	237	208	217	233	138		59	42	56	127
42.76	229	192	237	222	126		35	49	62	115
42.78	195	222	217	189	135		61	44	54	119
42.8	218	208	209	219	127		53	47	49	103
42.82	211	200	223	189	144		58	46	59	127
42.84	208	210	174	220	149		56	37	57	135
42.86	214	204	219	193	134		61	38	49	120
42.88	232	188	185	219	120		54	45	60	110
42.9	230	183	203	203	135		52	41	47	111
42.92	241	204	185	193	132		60	37	44	126
42.94	195	192	208	205	126		42	32	51	118
42.96	200	205	196	209	131		57	51	55	108
42.98	220	194	216	204	121		34	51	43	121
43	240	205	202	217	143		60	43	43	113
43.02	245	192	193	177	127		45	42	44	123
43.04	202	202	185	189	112		60	49	48	116
43.06	237	228	182	212	129		59	48	49	115
43.08	211	199	224	188	127		48	48	62	113
43.1	231	203	210	183	138		39	42	47	97
43.12	236	222	195	191	134		54	45	45	116
43.14	204	220	204	201	130		34	49	54	128
43.16	203	207	240	204	115		62	39	47	105
43.18	256	206	215	189	125		53	47	39	101
43.2	222	180	194	181	135		47	34	41	106
43.22	220	177	187	194	134		46	46	60	105
43.24	243	216	253	193	124		49	47	46	119
43.26	229	186	201	211	127		39	37	41	109
43.28	235	199	181	221	143		31	42	64	107
43.3	234	186	206	224	127		51	39	38	95
43.32	229	197	192	244	116		35	48	35	113
43.34	224	193	208	200	118		40	53	44	110
43.36	228	195	204	194	111		45	34	39	104
43.38	224	174	195	202	147		67	25	43	111
43.4	234	194	190	209	118		49	42	48	96
43.42	213	216	204	217	136		52	43	54	94
43.44	250	189	191	203	136		32	36	41	98
43.46	236	210	176	220	126		53	38	36	98
43.48	236	204	193	211	136		34	38	29	125
43.5	222	196	220	185	129		42	32	47	106
43.52	216	188	182	225	131		45	33	52	127
43.54	217	194	222	185	114		52	44	49	81
43.56	259	187	189	190	126		49	37	47	104
43.58	242	198	216	185	141		47	25	45	100
43.6	226	171	209	215	125		52	32	48	109
43.62	206	210	228	195	139		40	41	38	89
43.64	227	208	170	220	129		38	36	35	112
43.66	252	189	195	180	129		58	36	37	82
43.68	258	186	206	195	123		41	43	44	90
43.7	206	198	208	206	134		33	30	33	90
43.72	212	195	196	214	124		41	46	46	85
43.74	230	203	185	198	133		52	32	51	97
43.76	238	182	207	185	147		44	46	48	88
43.78	243	192	209	209	129		43	31	32	91
43.8	247	221	207	224	124		32	36	32	90
43.82	227	199	224	195	132		45	51	49	80
43.84	231	187	211	207	116		29	34	43	86
43.86	256	193	209	225	127		32	33	38	93
43.88	246	171	214	222	128		33	28	44	100
43.9	225	191	176	225	128		40	31	35	89
43.92	224	186	211	194	125		40	46	39	97
43.94	241	205	223	203	146		30	33	39	75
43.96	219	205	206	210	141		52	23	45	92
43.98	189	200	216	199	108		31	41	36	91
44	280	195	215	188	108		29	40	18	92
44.02	238	196	196	189	135		40	32	35	75
44.04	249	209	173	205	131		30	34	45	103
44.06	244	209	218	194	113		37	44	46	90
44.08	223	204	208	182	123		42	29	24	86
44.1	224	197	203	183	141		48	29	37	80
44.12	224	193	188	205	132		39	37	49	81
44.14	211	209	176	209	136		41	23	41	72
44.16	242	189	211	199	134		36	47	37	74
44.18	203	213	197	200	133		41	23	34	96
44.2	233	194	194	207	123		40	25	30	90
44.22	217	222	196	202	112		37	35	37	102
44.24	216	153	203	202	151		41	33	32	76
44.26	228	200	192	209	137		25	32	35	65
44.28	192	204	211	226	126		23	27	40	88
44.3	201	209	199	189	120		39	28	49	75
44.32	223	208	225	189	138		24	41	29	78
44.34	229	227	182	182	128		40	30	45	68
44.36	203	238	163	200	129		39	30	35	70
44.38	212	203	199	185	134		36	37	40	93
44.4	228	187	200	182	108		30	21	47	74
44.42	228	187	211	194	125		35	29	29	81
44.44	207	205	186	196	109		36	29	40	73
44.46	211	221	191	213	111		36	38	32	75
44.48	217	207	204	183	121		36	28	32	82
44.5	216	218	175	193	110		34	27	36	96
44.52	213	230	196	187	135		27	31	46	82
44.54	206	203	183	202	128		41	36	43	85
44.56	214	205	219	197	137		27	27	24	83
44.58	235	209	206	200	139		35	22	38	70
44.6	205	190	208	175	126		29	31	26	67
44.62	216	189	190	174	101		45	42	47	79
44.64	200	209	182	189	137		38	28	41	76
44.66	192	194	174	210	110		22	22	28	71
44.68	195	200	181	185	147		32	33	34	79
44.7	234	195	196	192	162		34	34	32	69
44.72	225	207	181	192	128		39	27	37	64
44.74	219	196	197	196	134		40	35	37	88
44.76	205	185	223	191	124		24	40	34	72
44.78	195	175	202	200	110		40	30	36	77
44.8	193	185	197	167	133		30	29	26	81
44.82	206	186	180	198	121		32	35	44	77
44.84	196	182	194	191	119		40	32	34	72
44.86	208	203	200	197	134		34	38	33	75
44.88	242	213	204	195	114		45	35	33	64
44.9	213	187	190	201	129		32	35	33	91
44.92	187	180	186	177	122		34	31	34	57
44.94	206	200	209	210	112		34	33	35	60
44.96	230	179	201	196	111		29	29	45	76
44.98	194	190	194	190	109		28	37	49	78
45	190	195	184	186	142		33	31	39	69
45.02	180	186	184	195	135		36	26	31	88
45.04	190	201	205	225	110		31	38	33	65
45.06	225	211	197	189	139		23	27	36	75
45.08	210	183	181	218	128		37	24	40	63
45.1	189	196	190	177	109		41	33	38	65
45.12	186	200	196	179	113		23	32	33	82
45.14	182	169	224	174	108		41	19	47	72
45.16	194	176	213	198	126		42	27	36	63
45.18	201	200	196	183	121		33	35	29	62
45.2	210	179	211	219	120		30	40	31	64
45.22	177	194	199	188	117		42	33	44	84
45.24	194	167	208	201	122		31	25	36	78
45.26	187	177	246	198	115		25	35	47	57
45.28	165	176	281	186	129		34	27	28	78
45.3	214	211	264	205	129		24	30	44	70
45.32	184	187	253	165	113		37	30	33	65
45.34	209	189	242	203	119		40	26	34	79
45.36	194	183	176	202	133		25	40	35	74
45.38	188	189	247	212	130		33	28	34	72
45.4	178	175	211	179	129		40	27	45	74
45.42	197	193	241	195	117		34	32	33	76
45.44	211	161	207	194	126		39	37	37	65
45.46	183	169	216	212	116		25	27	41	57
45.48	219	189	208	192	102		46	46	36	73
45.5	184	182	195	183	112		41	29	37	64
45.52	178	202	179	173	113		33	35	21	72
45.54	190	202	176	190	101		37	36	36	62
45.56	185	171	170	191	128		21	32	29	82
45.58	167	181	187	175	127		38	31	48	79
45.6	175	182	169	173	115		37	33	35	66
45.62	183	183	192	178	132		36	32	45	81
45.64	184	182	207	191	138		34	31	36	63
45.66	195	200	189	195	116		28	28	39	60
45.68	185	183	201	173	111		31	31	39	80
45.7	177	171	170	197	111		40	37	41	71
45.72	195	170	197	169	124		26	30	36	58
45.74	180	186	206	168	114		42	36	38	84
45.76	185	174	197	176	118		29	41	37	72
45.78	194	202	177	198	129		36	44	44	70
45.8	169	158	153	196	126		33	21	36	72
45.82	201	180	179	192	99		32	28	30	83
45.84	189	167	166	200	112		34	34	43	82
45.86	204	178	170	192	130		36	35	36	78
45.88	205	180	184	156	106		37	21	38	69
45.9	192	175	178	217	127		26	30	34	64
45.92	182	225	178	181	114		38	30	35	77
45.94	190	175	187	197	117		29	29	38	61
45.96	199	216	156	185	115		26	24	37	96
45.98	180	181	166	197	131		28	36	32	72
46	181	206	184	200	117		44	37	23	68
46.02	199	187	184	197	104		35	27	38	72
46.04	186	183	188	178	122		32	27	37	89
46.06	179	165	152	193	125		36	42	36	85
46.08	166	191	166	174	114		30	34	39	80
46.1	191	163	160	195	112		36	38	35	69
46.12	206	175	191	165	127		26	30	34	69
46.14	199	195	178	168	105		39	36	27	66
46.16	168	195	165	198	105		33	43	29	75
46.18	177	201	184	209	104		33	26	29	72
46.2	185	198	169	161	108		40	24	29	70
46.22	186	189	187	183	112		29	30	33	52
46.24	191	197	195	142	96		39	34	28	79
46.26	185	152	183	167	106		28	36	40	71
46.28	162	178	183	191	131		39	37	35	79
46.3	188	181	189	181	110		34	26	34	65
46.32	171	191	169	205	105		38	35	33	75
46.34	188	182	185	186	100		32	33	37	65
46.36	200	180	192	169	119		40	32	33	71
46.38	178	184	179	177	118		35	26	41	63
46.4	183	177	192	179	106		33	29	29	81
46.42	201	181	189	184	118		34	27	35	78
46.44	148	174	191		135		41	29	30	63
46.46	165	206	196		118		31	26	39	77
46.48	175	166	191		119		32	28	39	66
46.5	196	181	176		103		44	30	38	72
46.52	178	176	164		108		37	31	34	71
46.54	218	186	196		112		33	26	32	84
46.56	183	196	179		118		30	31	30	73
46.58	197	204	208		111		27	31	38	71
46.6	164	182	172		100		35	40	36	84
46.62	212	179	171		122		26	34	29	88
46.64	170	181	174		103		36	47	42	51
46.66	182	170	183		91		36	29	36	81
46.68	169	171	191		106		31	36	34	62
46.7	163	181	165		121		29	34	31	80
46.72	201	170	192		119		32	33	33	81
46.74	195	177	190		113		26	39	38	78
46.76	188	181	239		100		28	40	27	76
46.78	190	177	179		123		38	44	37	70
46.8	154	149	187		115		42	32	36	58
46.82	166	171	167		124		32	35	33	71
46.84	197	169	193		91		39	35	40	73
46.86	186	156	174		100		37	27	30	70
46.88	173	159	183		109		35	28	34	86
46.9	190	156	183		108		36	42	41	70
46.92	169	193	162		105		33	32	39	74
46.94	179	160	209		109		29	24	37	66
46.96	179	168	154		128		39	34	35	85
46.98	153	189	154		113		34	37	27	78
47	185	183	187		107		43	33	41	83
47.02	149	185	167		121		35	23	43	86
47.04	175	135	180		109		37	34	32	69
47.06	185	170	168		112		34	40	38	72
47.08	197	169	213		114		42	33	29	96
47.1	160	186	157		129		30	31	26	60
47.12	188	164	197		108		40	28	38	85
47.14	179	182	166		105		27	38	46	79
47.16	159	175	159		109		37	34	41	87
47.18	168	194	202		110		35	48	35	71
47.2	184	162	179		112		30	38	41	82
47.22	170	170	180		116		38	34	39	102
47.24	187	167	177		106		29	46	47	77
47.26	196	164	180		93		62	29	45	85
47.28	184	167	183		118		38	34	36	93
47.3	165	154	187		119		32	29	33	59
47.32	167	146	207		107		36	43	40	82
47.34	162	161	209		121		37	35	35	75
47.36	160	177	216		101		28	38	38	93
47.38	148	174	200		106		31	35	33	83
47.4	167	182	176		103		27	32	35	72
47.42	163	181	174		94		39	35	43	84
47.44	171	169	200		117		38	46	42	80
47.46	185	162	187		122		34	40	32	77
47.48	182	157	186		103		42	39	37	70
47.5	161	191	187		104		34	36	37	89
47.52	172	183	172		130		29	36	44	70
47.54	177	156	171		124		39	32	31	78
47.56	185	144	184		99		35	34	44	97
47.58	189	189	187		114		44	38	31	74
47.6	164	171	168		110		44	32	35	73
47.62	183	144	166		103		31	58	42	97
47.64	174	188	171		101		27	30	48	70
47.66	194	170	178		111		27	35	48	94
47.68	162	184	170		110		38	42	40	90
47.7	181	161	189		108		30	36	38	88
47.72	171	139	158		115		40	47	42	60
47.74	166	143	166		106		39	30	42	80
47.76	150	167	160		99		32	36	41	73
47.78	174	168	178		109		35	33	42	100
47.8	174	140	167		104		44	31	40	93
47.82	149	179	166		106		30	33	41	84
47.84	169	169	166		87		35	50	52	103
47.86	182	164	182		91		39	36	36	76
47.88	170	161	130		123		38	22	38	76
47.9	173	144	181		94		32	34	31	88
47.92	169	173	181		87		36	22	36	87
47.94	194	180	162		106		47	37	35	73
47.96	180	174	153		93		36	37	35	73
47.98	182	169	169		105		40	32	36	85
48	172	163	146		120		39	45	31	72
48.02	190	154	154		123		28	33	34	82
48.04	176	168	151		108		24	32	24	74
48.06	169	159	156		105		50	31	40	90
48.08	154	192	151		104		28	32	40	84
48.1	198	175	168		95		37	33	29	86
48.12	167	181	163		102		29	36	41	82
48.14	171	156	151		116		27	36	34	71
48.16	177	135	162		104		35	32	39	61
48.18	178	165	165		120		35	32	28	71
48.2	175	187	149		97		42	34	35	66
48.22	163	154	166		95		34	24	31	60
48.24	167	165	148		86		35	22	28	85
48.26	159	133	159		119		35	26	44	71
48.28	189	191	147		111		21	28	28	62
48.3	171	141	169		98		31	32	39	61
48.32	157	162	166		100		28	35	29	66
48.34	179	136	158		97		30	26	27	68
48.36	168	164	182		115		34	26	24	62
48.38	171	156	178		107		29	31	37	66
48.4	164	179	157		100		25	34	32	80
48.42	173	169	171		85		31	23	29	76
48.44	164	156	163		99		40	33	42	59
48.46	161	165	154		95		29	23	34	61
48.48	183	152	144		103		27	27	37	80
48.5	177	167	161		96		29	28	29	65
48.52	178	197	177		124		39	23	25	61
48.54	178	158	190		112		34	36	25	59
48.56	170	163	188		109		36	28	39	65
48.58	137	155	184		92		27	34	33	58
48.6	167	149	161		109		35	26	33	72
48.62	202	153	195		115		31	25	30	74
48.64	151	175	164		104		27	30	24	58
48.66	159	184	137		111		27	33	32	65
48.68	187	167	170		83		35	28	45	69
48.7	191	170	157		105		21	32	24	66
48.72	176	136	159		115		29	22	30	64
48.74	155	150	164		94		38	26	41	63
48.76	194	172	157		94		22	18	39	68
48.78	178	143	150		113		30	23	40	66
48.8	161	170	180		98		25	27	35	61
48.82	173	153	156		93		30	28	34	70
48.84	156	154	165		122		31	37	31	68
48.86	157	155	169		118		27	18	26	61
48.88	156	155	154		102		14	29	35	69
48.9	177	166	167		103		37	32	36	75
48.92	173	156	159		108		31	31	40	67
48.94	167	153	159		95		36	26	30	61
48.96	158	139	147		112		31	34	34	63
48.98	158	185	137		109		38	29	30	56
49	165	164	141		94		29	20	28	69
49.02	151	148	139		97		33	38	18	59
49.04	175	155	166		121		25	24	28	64
49.06	165	162	159		103		47	28	41	82
49.08	159	139	159		110		27	31	35	67
49.1	180	137	187		113		27	19	23	73
49.12	163	151	162		105		28	16	41	67
49.14	169	159	147		109		29	30	22	53
49.16	172	191	161		90		29	30	33	65
49.18	152	164	166		98		21	32	39	54
49.2	163	144	163		115		30	29	35	69
49.22	172	154	146		112		26	39	33	68
49.24	157	143	178		86		47	27	29	77
49.26	168	134	153		105		37	24	34	73
49.28	151	175	164		84		33	23	22	56
49.3	152	162	162		110		25	25	39	63
49.32	151	187	156		97		27	22	42	70
49.34	171	144	165		99		26	31	35	70
49.36	167	151	165		106		40	30	28	77
49.38	175	166	139		101		32	23	34	77
49.4	148	156	172		82		29	24	30	69
49.42	157	150	146		115		32	24	33	56
49.44	157	127	154		116		31	27	25	81
49.46	136	156	151		98		27	28	22	81
49.48	170	160	166		82		30	26	33	65
49.5	160	160	143		91		25	23	26	65
49.52	179	155	143		95		35	33	30	76
49.54	144	153	165		95		30	21	27	65
49.56	166	136	162		80		37	28	27	65
49.58	179	144	165		94		21	25	24	68
49.6	167	133	145		93		33	27	21	71
49.62	183	178	157		96		20	35	26	60
49.64	148	144	150		109		35	25	36	53
49.66	152	154	150		94		28	33	30	56
49.68	160	153	154		97		40	30	24	58
49.7	156	151	131		71		31	29	30	75
49.72	169	164	147		85		24	24	26	67
49.74	154	126	160		95		27	31	17	71
49.76	153	140	150		100		28	17	29	71
49.78	170	140	136		102		35	20	32	68
49.8	191	167	158		93		33	20	33	70
49.82	146	145	154		108		28	23	33	50
49.84	148	157	149		92		25	17	30	67
49.86	172	159	152		98		32	24	24	64
49.88	136	176	138		102		34	28	25	69
49.9	165	173	146		94		28	26	17	68
49.92	168	152	142		77		34	22	23	65
49.94	154	151	163		97		30	18	32	65
49.96	161	139	136		95		27	23	34	56
[truncated: 1,501 more rows]

## Sheet: TGA
Temperature (°C)	Weight (mg) PCL		Temperature (°C)	Weight (mg) Prog		Temperature (°C)	Weight (mg) E1		Temperature (°C)	Weight (mg) E2		Temperature (°C)	Weight (mg) E3		temp	wt PCL-Progestrone		temp	wt PCL-E1		temp	wt PCL-E2		temp	wt PCL-E3
23.7678	13.027		25.5673	4.73968		25.3532	6.70648		24.39	5.8493		26.1315	10.0683		25.0567	19.3247		24.6632	12.1872		24.1846	22.4658		25.0967	5.17792
23.7681	13.0268		25.567	4.73946		25.3547	6.70439		24.3909	5.85198		26.1305	10.0692		25.0574	19.334		24.6636	12.1874		24.1839	22.4681		25.0969	5.18038
23.7695	13.0272		25.5687	4.73871		25.3573	6.70094		24.3907	5.85356		26.1289	10.0676		25.0591	19.3343		24.6662	12.1858		24.1845	22.4664		25.0968	5.18185
23.7719	13.0274		25.5742	4.74051		25.3626	6.70557		24.3935	5.84984		26.1337	10.0693		25.0592	19.3249		24.6737	12.1868		24.1851	22.4651		25.0987	5.17743
23.7793	13.0269		25.5853	4.73915		25.372	6.70509		24.4004	5.8509		26.1431	10.0688		25.0624	19.332		24.6866	12.188		24.1853	22.4676		25.1001	5.18018
23.7924	13.0273		25.6031	4.7387		25.3896	6.70102		24.4147	5.8525		26.1605	10.0666		25.0658	19.3348		24.7083	12.1866		24.1889	22.4667		25.1054	5.1822
23.813	13.0274		25.629	4.74152		25.4124	6.70545		24.4366	5.85054		26.1871	10.0696		25.0725	19.326		24.737	12.1873		24.1956	22.465		25.1124	5.17742
23.84	13.0273		25.6644	4.7398		25.4468	6.70619		24.4661	5.85228		26.2209	10.0699		25.0824	19.3303		24.7775	12.1886		24.2039	22.4675		25.1228	5.18
23.8788	13.028		25.7114	4.73899		25.4935	6.70119		24.5058	5.85377		26.2689	10.0681		25.0967	19.335		24.8286	12.1871		24.2165	22.4672		25.1364	5.18181
23.9285	13.0285		25.7705	4.7429		25.5482	6.705		24.5564	5.85167		26.3285	10.0704		25.1145	19.3281		24.8917	12.1879		24.2335	22.4654		25.1564	5.17801
23.9908	13.0285		25.8414	4.74029		25.6182	6.70715		24.6208	5.85258		26.3999	10.0701		25.1385	19.3292		24.9684	12.1899		24.2576	22.4674		25.1811	5.18078
24.0658	13.029		25.9248	4.7392		25.6986	6.70226		24.6977	5.85438		26.4849	10.0689		25.1671	19.3347		25.0564	12.1884		24.2863	22.4679		25.2108	5.18256
24.1522	13.0293		26.0193	4.74348		25.7921	6.70453		24.7867	5.85326		26.5806	10.0721		25.2016	19.3302		25.156	12.1886		24.3203	22.4661		25.2476	5.17862
24.2493	13.0291		26.1246	4.74113		25.8951	6.70796		24.8852	5.85361		26.6883	10.071		25.2416	19.3286		25.2651	12.1904		24.3597	22.4678		25.2875	5.1807
24.3554	13.0296		26.2367	4.73987		26.005	6.70251		24.9943	5.85411		26.8018	10.0686		25.2859	19.3344		25.381	12.1888		24.404	22.4683		25.3353	5.18189
24.4686	13.0294		26.3555	4.74288		26.1233	6.70426		25.1102	5.85363		26.923	10.0713		25.3349	19.331		25.5039	12.1891		24.4539	22.4661		25.3853	5.17921
24.5869	13.0291		26.4809	4.73878		26.2478	6.70553		25.2324	5.85422		27.0509	10.0704		25.3897	19.328		25.6329	12.1894		24.5084	22.4671		25.44	5.18076
24.7134	13.0295		26.61	4.73916		26.3754	6.70213		25.3618	5.85383		27.1832	10.07		25.4465	19.3302		25.7669	12.1882		24.5652	22.4672		25.4995	5.17976
24.8422	13.0294		26.7455	4.74045		26.5101	6.70276		25.496	5.85362		27.3218	10.0708		25.5084	19.3283		25.9041	12.1885		24.6267	22.4661		25.562	5.17896
24.9767	13.0296		26.8838	4.73778		26.6485	6.7033		25.6337	5.85287		27.4625	10.0693		25.5724	19.3273		26.0459	12.189		24.6922	22.4664		25.6282	5.17937
25.1152	13.0298		27.028	4.73888		26.7908	6.70193		25.775	5.85236		27.6077	10.069		25.6403	19.3285		26.191	12.1886		24.7597	22.4666		25.6966	5.17878
25.2579	13.0294		27.1751	4.74059		26.9378	6.70253		25.9207	5.852		27.7568	10.0697		25.7106	19.33		26.3406	12.189		24.8317	22.466		25.7699	5.18006
25.4058	13.0296		27.3288	4.73883		27.0906	6.70306		26.0709	5.85172		27.9107	10.0688		25.7856	19.3255		26.4953	12.1894		24.9063	22.4669		25.846	5.18048
25.559	13.0298		27.4885	4.73936		27.2493	6.70392		26.2263	5.85205		28.07	10.0701		25.8646	19.3262		26.6549	12.1895		24.9845	22.4675		25.9265	5.17989
25.7199	13.0297		27.6535	4.74002		27.4123	6.70315		26.3868	5.85285		28.2355	10.07		25.9474	19.3267		26.8214	12.1897		25.0684	22.4662		26.0115	5.17961
25.8857	13.0297		27.8266	4.74		27.5839	6.70344		26.5551	5.85411		28.408	10.0697		26.0349	19.3265		26.9958	12.1897		25.156	22.4673		26.1013	5.1804
26.0575	13.03		28.0036	4.74035		27.7603	6.70305		26.7297	5.85357		28.5891	10.0694		26.1276	19.3268		27.1772	12.1897		25.2481	22.4676		26.1961	5.17916
26.237	13.0303		28.1901	4.74097		27.9447	6.70266		26.9133	5.85347		28.7773	10.0707		26.2242	19.3275		27.3686	12.1899		25.3456	22.4666		26.2956	5.17969
26.4251	13.0304		28.3841	4.74113		28.1365	6.70285		27.1049	5.85307		28.9764	10.0696		26.3296	19.324		27.5683	12.19		25.4504	22.467		26.4018	5.18063
26.6194	13.0302		28.5852	4.74183		28.3354	6.70277		27.3075	5.85265		29.1844	10.0702		26.4398	19.3256		27.7788	12.19		25.5605	22.4673		26.5129	5.17958
26.8214	13.0304		28.7932	4.74217		28.5419	6.70202		27.519	5.85328		29.4027	10.0701		26.5556	19.3286		27.9981	12.1899		25.6767	22.4674		26.6315	5.17977
27.0305	13.0305		29.0086	4.74239		28.7556	6.70208		27.7404	5.85331		29.6314	10.0709		26.6775	19.3255		28.2305	12.1899		25.8	22.4677		26.756	5.17945
27.2485	13.0305		29.2317	4.74251		28.9761	6.70221		27.9727	5.85322		29.8699	10.0712		26.8065	19.3258		28.47	12.1902		25.9293	22.4678		26.8877	5.17895
27.4727	13.0307		29.4618	4.74244		29.2041	6.70228		28.2152	5.8537		30.1177	10.0707		26.9427	19.3268		28.721	12.1905		26.0665	22.4678		27.026	5.17916
27.7039	13.0308		29.6972	4.74244		29.4374	6.70264		28.4682	5.85403		30.3778	10.0706		27.0855	19.327		28.9813	12.1906		26.2085	22.4677		27.1708	5.17955
27.9415	13.0309		29.9411	4.7424		29.6791	6.70265		28.7314	5.85396		30.6473	10.0705		27.2363	19.3279		29.2519	12.1907		26.3613	22.4678		27.3251	5.17962
28.1865	13.031		30.1919	4.74225		29.9264	6.70248		29.0025	5.85404		30.924	10.0705		27.3928	19.3286		29.5299	12.1907		26.5177	22.4677		27.4844	5.17991
28.4389	13.0311		30.4474	4.74227		30.1813	6.70254		29.283	5.85406		31.2083	10.0707		27.5569	19.3284		29.8138	12.1906		26.6822	22.4679		27.6506	5.1801
28.6968	13.0311		30.7106	4.74231		30.4408	6.7027		29.5699	5.8541		31.4992	10.0709		27.7256	19.3289		30.1057	12.1907		26.8538	22.4681		27.8222	5.18015
28.9619	13.0312		30.9761	4.7422		30.7068	6.70264		29.8643	5.85432		31.7972	10.0709		27.9026	19.3296		30.402	12.1907		27.0316	22.4683		28.0015	5.18035
29.2296	13.0312		31.2491	4.74218		30.9773	6.70259		30.1621	5.85448		32.0991	10.071		28.0844	19.3298		30.7049	12.1906		27.2142	22.4685		28.187	5.18042
29.5044	13.0313		31.5259	4.7422		31.2521	6.70271		30.4663	5.85465		32.4048	10.071		28.2708	19.33		31.0079	12.1907		27.4037	22.4686		28.3762	5.18047
29.7839	13.0313		31.8051	4.74211		31.5312	6.70278		30.7724	5.85479		32.7138	10.0709		28.4625	19.3304		31.3161	12.1908		27.5961	22.4687		28.5695	5.18064
30.063	13.0314		32.0892	4.74211		31.8133	6.70281		31.0816	5.85486		33.0227	10.0709		28.6578	19.3307		31.6243	12.1908		27.7934	22.4688		28.7657	5.18077
30.3482	13.0314		32.3734	4.74215		32.097	6.70294		31.3914	5.8549		33.3338	10.071		28.8561	19.3309		31.9332	12.1908		27.9938	22.4688		28.9669	5.18088
30.636	13.0314		32.6614	4.74213		32.384	6.70304		31.7031	5.85495		33.644	10.071		29.0565	19.3312		32.2422	12.1908		28.196	22.4689		29.169	5.18102
30.9225	13.0314		32.9507	4.7422		32.6722	6.70307		32.0141	5.85498		33.9536	10.071		29.2603	19.3314		32.5498	12.1908		28.3995	22.469		29.3739	5.18111
31.2126	13.0314		33.2398	4.74226		32.9623	6.70318		32.3239	5.85501		34.2625	10.071		29.4642	19.3315		32.8583	12.1908		28.6072	22.4691		29.5795	5.18119
31.5026	13.0315		33.5308	4.74225		33.2518	6.70324		32.6316	5.85503		34.5691	10.071		29.6699	19.3317		33.1639	12.1909		28.8132	22.4692		29.786	5.1813
31.7939	13.0315		33.8218	4.7423		33.5418	6.70328		32.9397	5.85505		34.8751	10.071		29.8753	19.3319		33.4687	12.1909		29.0194	22.4692		29.9921	5.18137
32.0844	13.0315		34.1124	4.74235		33.8321	6.70336		33.2457	5.85507		35.1779	10.071		30.08	19.332		33.7705	12.1909		29.2258	22.4693		30.1987	5.18144
32.3757	13.0315		34.4015	4.74236		34.1218	6.70344		33.5489	5.85507		35.4794	10.071		30.2866	19.3321		34.0714	12.1909		29.4325	22.4694		30.406	5.18153
32.6654	13.0315		34.6907	4.7424		34.4111	6.70348		33.8516	5.85507		35.7786	10.071		30.4931	19.3323		34.3693	12.1908		29.6389	22.4694		30.6126	5.18158
32.9551	13.0315		34.979	4.74245		34.7006	6.70354		34.1496	5.85508		36.0757	10.071		30.698	19.3324		34.6668	12.1908		29.8458	22.4695		30.8181	5.18164
33.2437	13.0315		35.2666	4.74247		34.9892	6.7036		34.4473	5.85508		36.3712	10.0709		30.9039	19.3324		34.9608	12.1908		30.0513	22.4695		31.0236	5.1817
33.5304	13.0315		35.5526	4.7425		35.2753	6.70363		34.7429	5.85507		36.6645	10.0709		31.108	19.3326		35.2542	12.1907		30.2564	22.4696		31.228	5.18173
33.816	13.0315		35.8368	4.74253		35.5593	6.70366		35.0352	5.85507		36.9554	10.0709		31.313	19.3327		35.5436	12.1907		30.4608	22.4696		31.4324	5.18178
34.1009	13.0315		36.1199	4.74253		35.8447	6.7037		35.3262	5.85504		37.2445	10.0708		31.5171	19.3327		35.8311	12.1907		30.6631	22.4696		31.6369	5.18183
34.3831	13.0315		36.4024	4.74254		36.1249	6.70374		35.6157	5.855		37.5311	10.0708		31.7205	19.3329		36.1185	12.1906		30.8673	22.4697		31.8389	5.18185
34.6657	13.0315		36.6821	4.74255		36.4064	6.70376		35.9024	5.85498		37.8165	10.0708		31.9227	19.333		36.4025	12.1906		31.0695	22.4697		32.0413	5.1819
34.9444	13.0315		36.9582	4.74256		36.6836	6.70379		36.1874	5.85495		38.0991	10.0707		32.1254	19.3329		36.6863	12.1905		31.2715	22.4697		32.2427	5.18193
35.2217	13.0314		37.2335	4.74258		36.9611	6.70381		36.4689	5.8549		38.3806	10.0707		32.3271	19.3331		36.9659	12.1904		31.4731	22.4697		32.444	5.18193
35.4986	13.0314		37.508	4.74259		37.2363	6.7038		36.7497	5.85488		38.6595	10.0706		32.5279	19.3332		37.2449	12.1904		31.6733	22.4697		32.6428	5.18196
35.7712	13.0314		37.7805	4.74259		37.5084	6.70381		37.0273	5.85484		38.9366	10.0705		32.7277	19.3329		37.5211	12.1903		31.8709	22.4698		32.8426	5.18197
36.0422	13.0314		38.0503	4.7426		37.7794	6.70383		37.3039	5.85479		39.2126	10.0705		32.9282	19.333		37.7957	12.1902		32.0706	22.4698		33.041	5.18196
36.3125	13.0313		38.319	4.74259		38.05	6.70382		37.578	5.85476		39.4858	10.0704		33.1257	19.3331		38.0682	12.1902		32.2669	22.4698		33.2384	5.18198
36.581	13.0313		38.5845	4.74258		38.3169	6.70381		37.8501	5.8547		39.757	10.0703		33.3234	19.333		38.34	12.1901		32.4642	22.4698		33.4333	5.18199
36.8461	13.0313		38.8501	4.74258		38.5814	6.70384		38.1197	5.85462		40.028	10.0702		33.5201	19.3331		38.6082	12.19		32.6592	22.4698		33.6291	5.18197
37.1109	13.0313		39.1133	4.74256		38.8463	6.70383		38.3881	5.85458		40.2946	10.0701		33.7161	19.3332		38.8756	12.1899		32.8534	22.4698		33.8228	5.182
37.3732	13.0312		39.3753	4.74256		39.1082	6.70381		38.6537	5.85453		40.5606	10.0701		33.9096	19.333		39.1401	12.1898		33.0458	22.4697		34.0162	5.18198
37.6343	13.0312		39.635	4.74257		39.3683	6.70382		38.9181	5.85448		40.8245	10.07		34.1038	19.333		39.4024	12.1897		33.2383	22.4697		34.2066	5.18195
37.8934	13.0312		39.8936	4.74254		39.6268	6.70379		39.1811	5.85443		41.0869	10.0699		34.2941	19.333		39.6633	12.1896		33.428	22.4697		34.397	5.18195
38.1507	13.0311		40.1507	4.74253		39.8843	6.70376		39.4407	5.85437		41.3461	10.0698		34.4849	19.3329		39.9237	12.1895		33.6171	22.4697		34.5853	5.18193
38.409	13.0311		40.4055	4.74253		40.1391	6.70377		39.6999	5.8543		41.6049	10.0697		34.6744	19.3328		40.1805	12.1894		33.8049	22.4697		34.7729	5.1819
38.6649	13.0311		40.6592	4.7425		40.394	6.70376		39.9564	5.85425		41.8606	10.0696		34.8617	19.3328		40.4359	12.1893		33.9909	22.4697		34.9585	5.1819
38.918	13.031		40.9137	4.74248		40.6484	6.70373		40.2111	5.8542		42.1142	10.0695		35.048	19.3328		40.6895	12.1892		34.1757	22.4696		35.1436	5.18186
39.1722	13.031		41.1659	4.7425		40.9009	6.70374		40.4654	5.85414		42.3675	10.0694		35.2328	19.3327		40.9423	12.1891		34.36	22.4696		35.3263	5.18182
39.4232	13.031		41.4175	4.74247		41.1508	6.70373		40.7165	5.85409		42.6193	10.0693		35.4174	19.3327		41.1938	12.189		34.5415	22.4695		35.5089	5.18181
39.6761	13.0309		41.6669	4.74245		41.4019	6.70369		40.967	5.85403		42.8689	10.0693		35.5999	19.3327		41.4432	12.1889		34.7228	22.4695		35.6891	5.18176
39.9263	13.0309		41.9171	4.74245		41.6531	6.70367		41.2169	5.85398		43.1172	10.0692		35.7807	19.3326		41.6914	12.1888		34.9019	22.4694		35.8689	5.18171
40.176	13.0309		42.1659	4.74241		41.9024	6.70366		41.4653	5.85392		43.3647	10.0691		35.9595	19.3326		41.9387	12.1887		35.0806	22.4694		36.0466	5.18169
40.4255	13.0307		42.4134	4.7424		42.151	6.70363		41.7123	5.85385		43.6102	10.069		36.139	19.3326		42.1858	12.1886		35.2577	22.4693		36.2234	5.18164
40.6725	13.0307		42.6623	4.7424		42.3995	6.70363		41.9589	5.85379		43.8558	10.0689		36.3158	19.3325		42.4325	12.1885		35.4344	22.4693		36.3999	5.1816
40.9224	13.0307		42.9083	4.74237		42.6482	6.70363		42.2047	5.85373		44.1001	10.0688		36.4918	19.3324		42.6782	12.1883		35.6091	22.4692		36.5737	5.18157
41.1699	13.0304		43.1574	4.74236		42.8959	6.7036		42.4491	5.85368		44.3445	10.0687		36.667	19.3324		42.922	12.1882		35.7832	22.4692		36.7489	5.18151
41.4168	13.0296		43.4041	4.74237		43.144	6.70358		42.6928	5.85363		44.5883	10.0686		36.841	19.3324		43.1663	12.1881		35.9552	22.4691		36.9205	5.18146
41.6642	13.0307		43.6514	4.74234		43.3912	6.70357		42.937	5.85357		44.8309	10.0685		37.0134	19.3322		43.4111	12.188		36.1274	22.469		37.0928	5.18141
41.9104	13.0307		43.8984	4.74232		43.6384	6.70354		43.1801	5.85351		45.0743	10.0684		37.1845	19.3322		43.6548	12.1879		36.2986	22.469		37.2634	5.18135
42.1583	13.033		44.1456	4.74231		43.8849	6.70352		43.4232	5.85346		45.3165	10.0683		37.3558	19.3321		43.8978	12.1878		36.4686	22.4689		37.4331	5.1813
42.403	13.035		44.3928	4.74229		44.1325	6.7035		43.6648	5.8534		45.5592	10.0682		37.5261	19.332		44.1408	12.1877		36.638	22.4689		37.6029	5.18125
42.6509	13.0347		44.6408	4.74227		44.3804	6.70349		43.9076	5.85334		45.8019	10.0682		37.6951	19.332		44.3835	12.1876		36.807	22.4688		37.7706	5.18119
42.8986	13.034		44.8888	4.74227		44.6269	6.70347		44.1505	5.8533		46.0459	10.0681		37.8629	19.3319		44.6265	12.1875		36.9742	22.4688		37.9385	5.18115
43.1454	13.0331		45.1343	4.74226		44.8749	6.70345		44.3932	5.85326		46.2874	10.068		38.0308	19.3318		44.8712	12.1874		37.1416	22.4687		38.1056	5.1811
43.3933	13.0325		45.3816	4.74225		45.1221	6.70344		44.6356	5.8532		46.5302	10.0679		38.1969	19.3317		45.1143	12.1873		37.3088	22.4686		38.2736	5.18104
43.6406	13.0322		45.6313	4.74225		45.3684	6.70341		44.8792	5.85317		46.7723	10.0679		38.3636	19.3316		45.3578	12.1872		37.4758	22.4686		38.4391	5.18099
43.8888	13.0316		45.8795	4.74223		45.6172	6.70339		45.1211	5.85312		47.0157	10.0678		38.5296	19.3315		45.6005	12.1871		37.6422	22.4685		38.6051	5.18093
44.1357	13.0306		46.1275	4.74223		45.8651	6.70339		45.365	5.85306		47.2594	10.0677		38.6956	19.3315		45.8453	12.187		37.8066	22.4684		38.771	5.18086
44.3847	13.0303		46.3773	4.74221		46.1141	6.70337		45.6069	5.85302		47.5017	10.0676		38.8608	19.3314		46.0892	12.1868		37.9715	22.4684		38.9358	5.18082
44.633	13.03		46.6256	4.7422		46.364	6.70335		45.8528	5.85298		47.7455	10.0675		39.0262	19.3313		46.3341	12.1867		38.136	22.4683		39.0993	5.18077
44.8821	13.03		46.8749	4.74221		46.6127	6.70336		46.0978	5.85294		47.9901	10.0675		39.1905	19.3312		46.5796	12.1866		38.3004	22.4683		39.2642	5.1807
45.13	13.0299		47.1255	4.7422		46.8616	6.70334		46.3416	5.85291		48.234	10.0674		39.3555	19.3312		46.8252	12.1866		38.4659	22.4682		39.4277	5.18065
45.3788	13.0298		47.3753	4.74219		47.1114	6.70331		46.5867	5.85287		48.4794	10.0673		39.5191	19.331		47.0703	12.1865		38.6294	22.4681		39.5909	5.18059
45.6289	13.03		47.6246	4.74219		47.3619	6.70331		46.8317	5.85282		48.7248	10.0673		39.6841	19.331		47.3161	12.1864		38.7926	22.4681		39.7541	5.18051
45.8802	13.0299		47.8756	4.74217		47.6117	6.70329		47.0776	5.85278		48.9706	10.0672		39.8474	19.3309		47.5627	12.1863		38.9567	22.468		39.9183	5.18046
46.1306	13.0353		48.1264	4.74215		47.8622	6.70327		47.3243	5.85275		49.2167	10.0671		40.0127	19.3309		47.8091	12.1861		39.1209	22.4679		40.0808	5.1804
46.3821	13.0652		48.3774	4.74216		48.1133	6.70328		47.5703	5.85271		49.4639	10.067		40.1754	19.3308		48.0572	12.186		39.2846	22.4678		40.244	5.18033
46.6322	13.0722		48.6278	4.74215		48.3647	6.70328		47.8184	5.85268		49.7123	10.067		40.3396	19.3308		48.3053	12.186		39.448	22.4678		40.4085	5.18029
46.8837	13.0659		48.8804	4.74215		48.6162	6.70325		48.0656	5.85265		49.9597	10.0669		40.5034	19.3307		48.5536	12.1859		39.6118	22.4677		40.5707	5.18024
47.1354	13.0562		49.1326	4.74216		48.8686	6.70325		48.3146	5.85262		50.2082	10.0668		40.6688	19.3306		48.8016	12.1858		39.7749	22.4676		40.7342	5.18018
47.3878	13.0381		49.3847	4.74216		49.1212	6.70324		48.5632	5.85259		50.4583	10.0668		40.8318	19.3306		49.0516	12.1857		39.9385	22.4675		40.8984	5.18012
47.6396	13.033		49.6365	4.74214		49.3732	6.70321		48.813	5.85255		50.7073	10.0667		40.9947	19.3305		49.3019	12.1856		40.1024	22.4675		41.063	5.18006
47.8916	13.0304		49.8887	4.74214		49.6261	6.7032		49.0615	5.85251		50.9565	10.0666		41.1602	19.3305		49.5516	12.1855		40.2657	22.4674		41.2261	5.17999
48.1444	13.0293		50.1416	4.74213		49.8792	6.7032		49.3113	5.85248		51.2064	10.0666		41.3225	19.3304		49.802	12.1854		40.4289	22.4673		41.3896	5.17994
48.3977	13.0292		50.3944	4.74212		50.1323	6.70319		49.5641	5.85246		51.4567	10.0665		41.4869	19.3304		50.0515	12.1853		40.5938	22.4672		41.5538	5.17989
48.649	13.0292		50.647	4.74213		50.3856	6.70319		49.8145	5.85243		51.708	10.0665		41.6503	19.3303		50.3035	12.1852		40.7577	22.4671		41.7188	5.17983
48.9032	13.0285		50.901	4.74213		50.639	6.70318		50.065	5.8524		51.9586	10.0664		41.8151	19.3303		50.5538	12.1851		40.9207	22.4671		41.8826	5.17978
49.1556	13.0281		51.1534	4.74213		50.8918	6.70316		50.3166	5.85237		52.2105	10.0663		41.9777	19.3302		50.805	12.185		41.0852	22.467		42.0477	5.17973
49.4099	13.028		51.4069	4.74214		51.1465	6.70315		50.5683	5.85233		52.4626	10.0663		42.1424	19.3301		51.0566	12.1849		41.2503	22.4669		42.212	5.17967
49.6624	13.029		51.659	4.74213		51.3994	6.70314		50.8197	5.8523		52.7146	10.0662		42.3068	19.3301		51.3066	12.1848		41.4143	22.4668		42.377	5.17962
49.9163	13.0299		51.9134	4.74212		51.6528	6.70313		51.0725	5.85226		52.9678	10.0662		42.4718	19.33		51.5582	12.1847		41.5793	22.4668		42.5427	5.17956
50.1686	13.0314		52.1664	4.74213		51.9055	6.70312		51.3248	5.85223		53.2213	10.0661		42.6361	19.33		51.8113	12.1846		41.7442	22.4667		42.7086	5.1795
50.4228	13.0451		52.4194	4.74212		52.1588	6.70312		51.577	5.8522		53.4725	10.0661		42.8022	19.3299		52.063	12.1846		41.9087	22.4666		42.8748	5.17945
50.6754	13.03		52.6727	4.74212		52.4133	6.70312		51.8306	5.85217		53.7251	10.066		42.9665	19.3299		52.3152	12.1845		42.0741	22.4665		43.0401	5.17939
50.931	13.0299		52.9264	4.74213		52.6668	6.7031		52.0828	5.85215		53.9771	10.066		43.1324	19.3298		52.5683	12.1844		42.2401	22.4665		43.2068	5.17935
51.183	13.0353		53.1791	4.74213		52.9198	6.70309		52.3359	5.85212		54.2302	10.0659		43.2988	19.3297		52.8203	12.1843		42.405	22.4664		43.3731	5.1793
51.4353	13.0652		53.4338	4.74212		53.1731	6.70308		52.5887	5.85208		54.4839	10.0659		43.463	19.3297		53.0734	12.1843		42.5719	22.4663		43.5388	5.17924
51.6894	13.0722		53.687	4.74212		53.426	6.70307		52.8412	5.85206		54.7372	10.0658		43.63	19.3296		53.3262	12.1842		42.7385	22.4662		43.707	5.17919
51.9431	13.0659		53.9395	4.74211		53.6794	6.70306		53.0943	5.85203		54.9895	10.0658		43.7964	19.3295		53.5786	12.1841		42.9048	22.4662		43.8732	5.17915
52.1959	13.0562		54.1938	4.74212		53.9329	6.70306		53.3477	5.85199		55.2428	10.0657		43.9636	19.3295		53.8319	12.184		43.0727	22.4661		44.0409	5.17909
52.4503	13.0381		54.4471	4.74212		54.1866	6.70306		53.6006	5.85197		55.4981	10.0657		44.1305	19.3295		54.0849	12.1839		43.2399	22.466		44.2089	5.17905
52.7026	13.033		54.6999	4.74212		54.4391	6.70304		53.8542	5.85196		55.7503	10.0656		44.2973	19.3294		54.3372	12.1838		43.4073	22.466		44.3754	5.17901
52.9553	13.0304		54.9532	4.74213		54.6931	6.70304		54.1076	5.85193		56.0035	10.0656		44.4633	19.3293		54.5907	12.1838		43.575	22.4659		44.5434	5.17895
53.2086	13.0293		55.2055	4.74213		54.946	6.70303		54.3624	5.8519		56.2567	10.0655		44.6318	19.3293		54.8445	12.1837		43.7436	22.4659		44.7107	5.1789
53.4616	13.0292		55.4589	4.74212		55.1986	6.70301		54.6142	5.85188		56.5108	10.0655		44.798	19.3292		55.0965	12.1836		43.912	22.4658		44.8786	5.17886
53.7138	13.0292		55.7121	4.74212		55.4516	6.70301		54.8682	5.85185		56.765	10.0655		44.9673	19.3291		55.3491	12.1835		44.0804	22.4657		45.0458	5.17879
53.9673	13.0285		55.9656	4.74211		55.7049	6.70301		55.122	5.85183		57.0181	10.0654		45.1345	19.3291		55.6039	12.1835		44.249	22.4657		45.2146	5.17875
54.2195	13.0281		56.2169	4.7421		55.9577	6.703		55.3744	5.8518		57.2718	10.0654		45.3038	19.329		55.8567	12.1834		44.4173	22.4656		45.3837	5.17871
54.4712	13.028		56.4683	4.74212		56.2114	6.70301		55.628	5.85178		57.5252	10.0653		45.4725	19.329		56.1089	12.1833		44.5871	22.4655		45.5508	5.17866
54.7241	13.029		56.7223	4.74212		56.4632	6.70301		55.8811	5.85176		57.7796	10.0653		45.6411	19.3289		56.3615	12.1832		44.7551	22.4655		45.7188	5.17862
54.9761	13.0299		56.9734	4.74212		56.7161	6.70299		56.1351	5.85174		58.0318	10.0652		45.8094	19.3289		56.6157	12.1832		44.9246	22.4654		45.8883	5.17859
55.2295	13.0314		57.2266	4.74213		56.9689	6.70298		56.3878	5.85171		58.2844	10.0652		45.9771	19.3288		56.8691	12.1831		45.094	22.4654		46.0564	5.17854
55.4797	13.0451		57.4785	4.74213		57.2218	6.70297		56.6405	5.85168		58.5386	10.0652		46.1462	19.3288		57.1213	12.183		45.2635	22.4653		46.2257	5.1785
55.7317	13.0199		57.7296	4.74211		57.4742	6.70296		56.8941	5.85166		58.7929	10.0651		46.3148	19.3287		57.3745	12.1829		45.4336	22.4652		46.3938	5.17845
55.9837	13.0191		57.9821	4.74212		57.7268	6.70296		57.1468	5.85164		59.045	10.0651		46.4838	19.3287		57.6289	12.1828		45.6023	22.4652		46.5638	5.1784
56.2356	13.0116		58.2331	4.74212		57.9788	6.70297		57.3996	5.85163		59.2982	10.065		46.652	19.3286		57.8814	12.1827		45.7724	22.4651		46.7313	5.17836
56.4883	13.014		58.4856	4.74212		58.2309	6.70296		57.6524	5.85161		59.5511	10.065		46.8216	19.3286		58.1343	12.1827		45.9412	22.4651		46.9	5.17832
56.7393	13.0182		58.7389	4.74213		58.4831	6.70296		57.9057	5.85158		59.8039	10.065		46.9901	19.3285		58.388	12.1826		46.1116	22.465		47.0683	5.17828
56.9901	13.0179		58.9903	4.74213		58.7356	6.70296		58.159	5.85156		60.0563	10.0649		47.1597	19.3284		58.6405	12.1825		46.2805	22.465		47.2372	5.17825
57.2422	13.0192		59.2421	4.74212		58.9864	6.70295		58.4117	5.85152		60.3094	10.0649		47.3282	19.3284		58.894	12.1824		46.4494	22.4649		47.4079	5.17821
57.4948	13.02		59.4939	4.74212		59.2385	6.70294		58.6642	5.8515		60.5614	10.0649		47.4969	19.3283		59.147	12.1823		46.6191	22.4648		47.5757	5.17817
57.746	13.02		59.7464	4.74212		59.4908	6.70294		58.9166	5.85149		60.813	10.0648		47.6665	19.3283		59.4	12.1822		46.7891	22.4648		47.7453	5.17813
57.9968	13.0202		59.9981	4.74211		59.7431	6.70294		59.1706	5.85146		61.0658	10.0648		47.8353	19.3283		59.6522	12.1821		46.9585	22.4647		47.9138	5.17809
58.2491	13.0213		60.2504	4.74212		59.9947	6.70295		59.422	5.85145		61.3187	10.0647		48.0046	19.3282		59.9059	12.182		47.1272	22.4646		48.083	5.17806
58.5022	13.0208		60.5028	4.74213		60.2464	6.70295		59.675	5.85143		61.5703	10.0647		48.1736	19.3281		60.1585	12.1819		47.2969	22.4645		48.2524	5.17803
58.7513	13.0209		60.7555	4.74213		60.4996	6.70295		59.9261	5.8514		61.8218	10.0647		48.3423	19.3281		60.4115	12.1818		47.4664	22.4645		48.4201	5.17799
59.0029	13.0211		61.0069	4.74213		60.7512	6.70294		60.179	5.85137		62.0742	10.0646		48.512	19.328		60.6634	12.1817		47.6355	22.4644		48.5897	5.17795
59.2555	13.0211		61.2603	4.74212		61.0023	6.70293		60.4315	5.85134		62.3269	10.0646		48.6802	19.3279		60.9163	12.1816		47.8039	22.4643		48.7591	5.17791
59.5073	13.0214		61.5112	4.74212		61.2541	6.70293		60.6824	5.8513		62.5789	10.0646		48.8495	19.3279		61.1692	12.1815		47.9734	22.4643		48.9291	5.17787
59.76	13.0218		61.7643	4.74212		61.5074	6.70293		60.9354	5.85128		62.8302	10.0645		49.0187	19.3279		61.4208	12.1814		48.1423	22.4642		49.0983	5.17783
60.0124	13.0206		62.0161	4.74212		61.7581	6.70292		61.1861	5.85126		63.0821	10.0645		49.188	19.3278		61.6715	12.1813		48.3115	22.4641		49.2677	5.1778
60.264	13.0209		62.2671	4.74213		62.0101	6.70293		61.4389	5.85122		63.3326	10.0644		49.3577	19.3277		61.9245	12.1812		48.4808	22.4641		49.4361	5.17776
60.5161	13.0216		62.5191	4.74213		62.2621	6.70293		61.6906	5.85119		63.5845	10.0644		49.5261	19.3277		62.1767	12.181		48.6496	22.464		49.6077	5.17773
60.7698	13.0217		62.7708	4.74214		62.5133	6.70291		61.9424	5.85115		63.8364	10.0643		49.6967	19.3276		62.4278	12.1809		48.8182	22.4639		49.7772	5.17771
61.023	13.0216		63.0232	4.74214		62.7652	6.70291		62.1939	5.85111		64.0878	10.0643		49.8653	19.3276		62.6805	12.1808		48.9886	22.4639		49.946	5.17767
61.2759	13.0202		63.2744	4.74214		63.0161	6.7029		62.4454	5.85108		64.3394	10.0643		50.035	19.3275		62.9313	12.1807		49.1569	22.4638		50.1146	5.17763
61.5302	13.0204		63.5262	4.74214		63.2678	6.70289		62.6971	5.85105		64.5903	10.0642		50.2048	19.3274		63.1828	12.1806		49.3256	22.4637		50.2846	5.1776
61.783	13.021		63.7769	4.74214		63.5202	6.70289		62.9473	5.85102		64.8418	10.0642		50.3735	19.3274		63.4337	12.1804		49.4951	22.4637		50.4551	5.17755
62.0377	13.0203		64.029	4.74215		63.7716	6.70289		63.1993	5.85098		65.0928	10.0642		50.5434	19.3274		63.6864	12.1803		49.6645	22.4636		50.6237	5.17752
62.2901	13.0204		64.2816	4.74215		64.0223	6.70289		63.4506	5.85094		65.3443	10.0641		50.7115	19.3273		63.9378	12.1802		49.833	22.4636		50.7927	5.17749
62.5454	13.0204		64.534	4.74216		64.2741	6.70288		63.7012	5.85089		65.5952	10.0641		50.8823	19.3272		64.1893	12.1801		50.0023	22.4635		50.9618	5.17745
62.7996	13.0204		64.7847	4.74216		64.5258	6.70288		63.9526	5.85084		65.8462	10.0641		51.0516	19.3272		64.4405	12.1799		50.1708	22.4635		51.1305	5.17743
63.0533	13.0201		65.037	4.74215		64.7772	6.70287		64.2042	5.8508		66.0975	10.064		51.2211	19.3271		64.6906	12.1798		50.3402	22.4634		51.3004	5.1774
63.3077	13.0207		65.2892	4.74216		65.0288	6.70286		64.4556	5.85075		66.3477	10.064		51.3899	19.3271		64.9428	12.1796		50.5084	22.4633		51.469	5.17736
63.563	13.0195		65.5409	4.74216		65.2809	6.70286		64.7057	5.8507		66.5997	10.064		51.5591	19.327		65.1939	12.1795		50.6773	22.4633		51.6384	5.17732
63.8163	13.0196		65.7926	4.74216		65.5317	6.70286		64.9568	5.85066		66.8505	10.0639		51.729	19.3269		65.4461	12.1794		50.8467	22.4632		51.8064	5.17728
64.0712	13.0197		66.0444	4.74217		65.7826	6.70286		65.2085	5.8506		67.1009	10.0639		51.8971	19.3269		65.6969	12.1792		51.0153	22.4632		51.9765	5.17724
64.3237	13.0197		66.2964	4.74218		66.0338	6.70286		65.46	5.85054		67.353	10.0638		52.0661	19.3268		65.9497	12.1791		51.1846	22.4631		52.1449	5.1772
64.5776	13.0196		66.5473	4.74217		66.2857	6.70286		65.7105	5.85047		67.603	10.0638		52.2354	19.3268		66.2001	12.1789		51.353	22.4631		52.3134	5.17717
64.8314	13.0204		66.7976	4.74218		66.5363	6.70285		65.9624	5.85042		67.8538	10.0638		52.404	19.3267		66.453	12.1788		51.5222	22.463		52.4822	5.17712
65.0846	13.0189		67.051	4.74218		66.7879	6.70284		66.2146	5.85036		68.1053	10.0638		52.5726	19.3267		66.7037	12.1786		51.6915	22.4629		52.6506	5.17709
65.3375	13.0181		67.302	4.74217		67.0384	6.70284		66.4664	5.85031		68.3551	10.0637		52.7415	19.3266		66.955	12.1785		51.8603	22.4629		52.8194	5.17704
65.5902	13.0199		67.554	4.74217		67.2905	6.70283		66.7173	5.85024		68.6072	10.0637		52.9099	19.3265		67.2075	12.1783		52.0294	22.4628		52.9873	5.177
65.8427	13.0187		67.8057	4.74218		67.5416	6.70284		66.9676	5.85018		68.8571	10.0637		53.0793	19.3265		67.4594	12.1782		52.1983	22.4628		53.1568	5.17695
66.0964	13.0184		68.0569	4.74218		67.7933	6.70284		67.2185	5.8501		69.1081	10.0636		53.2481	19.3264		67.7108	12.178		52.3666	22.4627		53.3251	5.1769
66.3483	13.0187		68.307	4.74219		68.0454	6.70284		67.4702	5.85003		69.3603	10.0636		53.4157	19.3263		67.9631	12.1779		52.5354	22.4627		53.4939	5.17686
66.6006	13.0187		68.5582	4.74219		68.2967	6.70283		67.72	5.84994		69.6102	10.0636		53.5854	19.3263		68.2144	12.1777		52.7042	22.4626		53.6623	5.17681
66.8517	13.0188		68.8109	4.74218		68.5498	6.70282		67.9711	5.84986		69.8615	10.0636		53.7536	19.3262		68.4671	12.1776		52.873	22.4626		53.8316	5.17676
67.1039	13.019		69.0625	4.74218		68.7997	6.70281		68.2219	5.84978		70.1124	10.0635		53.9235	19.3262		68.7192	12.1774		53.0415	22.4625		53.9999	5.17671
67.3563	13.0184		69.3137	4.74219		69.0503	6.70281		68.4717	5.84971		70.3631	10.0635		54.0918	19.3261		68.9712	12.1772		53.2106	22.4625		54.1685	5.17665
67.6084	13.0185		69.5654	4.74219		69.3026	6.70281		68.7221	5.84964		70.6136	10.0635		54.2597	19.326		69.2221	12.1771		53.3789	22.4625		54.3377	5.17658
67.8577	13.0185		69.8158	4.74219		69.5548	6.70281		68.9735	5.84957		70.8654	10.0634		54.4285	19.326		69.4742	12.1769		53.5469	22.4624		54.5066	5.17652
68.109	13.0185		70.0677	4.74219		69.8066	6.7028		69.2254	5.8495		71.1163	10.0634		54.5977	19.3259		69.727	12.1768		53.7153	22.4624		54.675	5.17646
68.3601	13.0185		70.3182	4.74219		70.0566	6.7028		69.4758	5.84943		71.3673	10.0634		54.7651	19.3258		69.9775	12.1766		53.8829	22.4623		54.8433	5.1764
68.6119	13.0185		70.5687	4.74219		70.3087	6.7028		69.7262	5.84933		71.6182	10.0634		54.9328	19.3258		70.2288	12.1765		54.0521	22.4623		55.0124	5.17634
68.862	13.0185		70.8215	4.74218		70.5619	6.70279		69.976	5.84922		71.8691	10.0633		55.101	19.3257		70.4801	12.1763		54.2192	22.4622		55.1812	5.17629
69.1122	13.0185		71.0728	4.74219		70.8117	6.70279		70.2276	5.8491		72.1199	10.0633		55.2684	19.3256		70.7333	12.1761		54.3878	22.4622		55.3496	5.17622
69.3624	13.0185		71.3234	4.74219		71.0636	6.7028		70.479	5.84897		72.3696	10.0633		55.4368	19.3256		70.984	12.176		54.5558	22.4621		55.5193	5.17615
69.6141	13.0185		71.5761	4.74219		71.3154	6.7028		70.7298	5.84884		72.6213	10.0633		55.6048	19.3255		71.2352	12.1758		54.7233	22.4621		55.6881	5.17608
69.8633	13.0187		71.8261	4.7422		71.5661	6.7028		70.9792	5.84869		72.872	10.0632		55.7736	19.3255		71.4857	12.1757		54.8922	22.462		55.8566	5.176
70.1142	13.0184		72.0783	4.74221		71.8189	6.7028		71.2307	5.84854		73.1219	10.0632		55.9409	19.3254		71.7372	12.1755		55.0604	22.462		56.025	5.17593
70.3639	13.0182		72.3291	4.74221		72.0698	6.7028		71.4819	5.84838		73.3736	10.0632		56.1076	19.3254		71.9879	12.1754		55.2274	22.4619		56.1938	5.17586
70.6149	13.019		72.5798	4.7422		72.3203	6.70279		71.7317	5.84821		73.6232	10.0632		56.2767	19.3253		72.2393	12.1752		55.3944	22.4619		56.3624	5.17579
70.8641	13.0184		72.8304	4.7422		72.5711	6.70279		71.9826	5.84805		73.8743	10.0632		56.4444	19.3253		72.4896	12.1751		55.5625	22.4619		56.5306	5.17572
71.1148	13.0179		73.0832	4.7422		72.8234	6.70278		72.2334	5.84787		74.1248	10.0631		56.6116	19.3252		72.7404	12.1749		55.7305	22.4619		56.6994	5.17565
71.3654	13.0181		73.3343	4.7422		73.0733	6.70278		72.4855	5.84769		74.3762	10.0631		56.7792	19.3251		72.9917	12.1747		55.8977	22.4619		56.8675	5.17557
71.6164	13.0181		73.5854	4.74221		73.3256	6.70279		72.7357	5.8475		74.6267	10.0631		56.9465	19.3251		73.2428	12.1746		56.0645	22.4619		57.0356	5.17549
71.8662	13.0181		73.8372	4.74222		73.576	6.70279		72.9862	5.84729		74.8788	10.0631		57.1135	19.325		73.493	12.1745		56.2322	22.4619		57.205	5.17541
72.1163	13.0185		74.0889	4.74222		73.828	6.70279		73.2365	5.84708		75.1291	10.063		57.282	19.3249		73.7418	12.1743		56.3996	22.4619		57.3731	5.17533
72.367	13.0178		74.34	4.74222		74.0777	6.70278		73.4877	5.84686		75.3802	10.063		57.4484	19.3249		73.9934	12.1742		56.5663	22.4619		57.5421	5.17525
72.6184	13.0177		74.5913	4.74221		74.3293	6.70277		73.7385	5.84663		75.6304	10.063		57.6158	19.3248		74.2438	12.174		56.7353	22.4618		57.7099	5.17517
72.8674	13.0182		74.8421	4.74221		74.5798	6.70276		73.9884	5.84639		75.8824	10.063		57.7827	19.3247		74.495	12.1739		56.9014	22.4618		57.8786	5.17509
73.1179	13.0178		75.0934	4.74221		74.8322	6.70276		74.2397	5.84614		76.1336	10.0629		57.9501	19.3247		74.7457	12.1738		57.068	22.4618		58.0465	5.17502
73.3699	13.0178		75.3451	4.74222		75.0827	6.70277		74.4892	5.84588		76.3854	10.0629		58.1182	19.3246		74.9963	12.1736		57.2362	22.4617		58.2142	5.17494
73.6196	13.0179		75.5959	4.74222		75.3339	6.70276		74.7402	5.8456		76.6367	10.0629		58.2859	19.3245		75.2463	12.1735		57.4033	22.4617		58.3832	5.17486
73.8702	13.0179		75.8465	4.74223		75.5841	6.70276		74.991	5.84531		76.8881	10.0629		58.4531	19.3245		75.4977	12.1733		57.5703	22.4616		58.5511	5.17479
74.1213	13.0178		76.0992	4.74222		75.8362	6.70276		75.2414	5.845		77.1393	10.0628		58.6211	19.3244		75.7488	12.1732		57.7381	22.4616		58.7189	5.17471
74.3721	13.018		76.3505	4.74221		76.0874	6.70276		75.4927	5.84469		77.3906	10.0628		58.7897	19.3244		75.9987	12.1731		57.9068	22.4615		58.8862	5.17464
74.6235	13.0179		76.5997	4.74221		76.3379	6.70275		75.7436	5.84438		77.6422	10.0628		58.9571	19.3243		76.25	12.1729		58.0733	22.4615		59.0555	5.17457
74.8747	13.0178		76.8508	4.74221		76.5888	6.70275		75.9947	5.84405		77.8922	10.0627		59.1252	19.3242		76.4997	12.1728		58.2405	22.4614		59.2227	5.1745
75.1252	13.0178		77.1022	4.74222		76.8398	6.70274		76.2456	5.84371		78.1442	10.0627		59.2933	19.3241		76.7496	12.1727		58.4081	22.4613		59.3909	5.17443
75.3756	13.0178		77.3529	4.74223		77.0918	6.70275		76.4974	5.84336		78.3948	10.0627		59.4611	19.3241		76.9999	12.1726		58.5763	22.4613		59.559	5.17437
75.6251	13.0178		77.6039	4.74223		77.3417	6.70275		76.7488	5.84298		78.6448	10.0626		59.6298	19.324		77.2509	12.1724		58.7429	22.4612		59.7268	5.1743
75.8765	13.0179		77.8543	4.74223		77.5918	6.70275		77	5.8426		78.8955	10.0626		59.7969	19.3239		77.5013	12.1723		58.9109	22.4611		59.895	5.17422
76.1286	13.0176		78.1061	4.74223		77.8436	6.70274		77.2505	5.84221		79.1456	10.0626		59.9642	19.3239		77.7514	12.1722		59.0778	22.461		60.0628	5.17415
76.3785	13.0176		78.356	4.74222		78.0949	6.70273		77.5014	5.84182		79.3969	10.0626		60.132	19.3238		78.0013	12.1721		59.2457	22.4609		60.2311	5.17408
76.629	13.0176		78.6078	4.74222		78.346	6.70272		77.7533	5.84141		79.6464	10.0625		60.2989	19.3237		78.2518	12.172		59.4134	22.4608		60.3987	5.17401
76.8809	13.0175		78.8586	4.74222		78.5964	6.70272		78.0047	5.841		79.8974	10.0625		60.468	19.3237		78.5024	12.1718		59.5809	22.4607		60.5666	5.17395
77.1304	13.0175		79.1107	4.74223		78.8473	6.70272		78.2542	5.84057		80.1469	10.0625		60.6354	19.3236		78.752	12.1717		59.7476	22.4606		60.7345	5.17388
77.3821	13.0174		79.3603	4.74223		79.0992	6.70273		78.5071	5.84011		80.3988	10.0625		60.8037	19.3235		79.0027	12.1716		59.9142	22.4604		60.9025	5.17382
77.633	13.0174		79.6118	4.74223		79.3497	6.70273		78.7581	5.83965		80.6498	10.0625		60.9714	19.3234		79.2522	12.1715		60.0817	22.4603		61.0694	5.17376
77.8835	13.0177		79.8629	4.74223		79.6007	6.70273		79.0085	5.83917		80.9002	10.0624		61.1396	19.3233		79.5032	12.1714		60.2488	22.4602		61.2371	5.17369
78.1354	13.0175		80.1132	4.74223		79.8521	6.70273		79.2598	5.83868		81.1517	10.0624		61.3069	19.3233		79.7546	12.1713		60.4156	22.46		61.4051	5.17363
78.3861	13.0175		80.3648	4.74223		80.1029	6.70272		79.5105	5.83818		81.4031	10.0624		61.4754	19.3232		80.0051	12.1711		60.5833	22.4599		61.5722	5.17357
78.6371	13.0175		80.6165	4.74222		80.3542	6.7027		79.7618	5.83767		81.6534	10.0623		61.6433	19.3231		80.2557	12.171		60.7505	22.4598		61.7403	5.17351
78.8895	13.0175		80.8672	4.74223		80.6048	6.7027		80.0127	5.83712		81.9051	10.0623		61.8102	19.323		80.5064	12.1709		60.917	22.4596		61.9067	5.17345
79.1396	13.0174		81.1169	4.74223		80.8561	6.7027		80.2632	5.83655		82.1558	10.0623		61.9788	19.3229		80.7575	12.1708		61.0858	22.4595		62.0748	5.17339
79.3909	13.0175		81.3691	4.74224		81.107	6.7027		80.5153	5.83597		82.4072	10.0623		62.146	19.3228		81.0093	12.1707		61.2518	22.4594		62.2415	5.17333
79.6425	13.0175		81.6206	4.74224		81.3575	6.70271		80.7662	5.83537		82.6573	10.0622		62.3153	19.3227		81.2597	12.1706		61.42	22.4593		62.4081	5.17326
79.8919	13.0173		81.8708	4.74224		81.6097	6.70271		81.0165	5.83477		82.9085	10.0622		62.4828	19.3226		81.5111	12.1705		61.5872	22.4591		62.5763	5.1732
80.144	13.0174		82.1219	4.74223		81.86	6.7027		81.2681	5.83416		83.1599	10.0622		62.6503	19.3225		81.7627	12.1704		61.7547	22.459		62.7432	5.17314
80.3949	13.0174		82.3737	4.74223		82.1106	6.7027		81.5186	5.83354		83.4099	10.0622		62.819	19.3224		82.013	12.1703		61.9213	22.4589		62.9108	5.17308
80.6459	13.0173		82.6245	4.74223		82.362	6.7027		81.7691	5.83289		83.6598	10.0621		62.9873	19.3224		82.2655	12.1702		62.089	22.4588		63.0774	5.17303
80.8982	13.0174		82.8756	4.74224		82.6128	6.70269		82.0198	5.83222		83.9117	10.0621		63.1548	19.3222		82.5153	12.1701		62.2565	22.4587		63.2443	5.17297
81.1486	13.0172		83.1267	4.74224		82.8648	6.70269		82.2701	5.83154		84.1626	10.0621		63.3218	19.3221		82.7666	12.17		62.4243	22.4586		63.4118	5.17293
81.3995	13.017		83.3775	4.74225		83.1145	6.70269		82.5199	5.83077		84.4133	10.0621		63.4909	19.322		83.0167	12.17		62.5923	22.4585		63.5784	5.17287
81.6508	13.0174		83.6285	4.74224		83.3654	6.70269		82.7713	5.82996		84.6641	10.062		63.6583	19.3219		83.2677	12.1699		62.7589	22.4584		63.7458	5.17281
81.9024	13.0173		83.8791	4.74224		83.6175	6.70269		83.0207	5.8292		84.9151	10.062		63.8265	19.3218		83.5182	12.1698		62.9255	22.4583		63.9122	5.17275
82.1532	13.017		84.13	4.74224		83.8683	6.70268		83.2719	5.82846		85.1663	10.062		63.9946	19.3217		83.7688	12.1697		63.0936	22.4582		64.0797	5.1727
82.4017	13.017		84.38	4.74224		84.1186	6.70267		83.5224	5.82763		85.4168	10.062		64.1629	19.3216		84.0201	12.1696		63.2607	22.4581		64.2459	5.17264
82.6558	13.017		84.6321	4.74224		84.3703	6.70267		83.7727	5.82672		85.668	10.0619		64.3306	19.3215		84.2706	12.1695		63.4286	22.458		64.4121	5.1726
82.905	13.017		84.8827	4.74224		84.6212	6.70266		84.0231	5.8257		85.918	10.0619		64.4994	19.3214		84.5213	12.1694		63.5975	22.4579		64.5778	5.17255
83.156	13.017		85.1336	4.74225		84.8712	6.70266		84.2731	5.82468		86.1691	10.0619		64.6668	19.3212		84.7713	12.1693		63.7646	22.4578		64.7453	5.1725
83.4076	13.0169		85.3849	4.74224		85.1227	6.70267		84.5239	5.82369		86.4198	10.0619		64.8343	19.3211		85.021	12.1692		63.9317	22.4577		64.911	5.17246
83.659	13.0168		85.6356	4.74224		85.3744	6.70267		84.775	5.82267		86.6697	10.0618		65.0027	19.321		85.2716	12.1691		64.0995	22.4576		65.0782	5.17242
83.9095	13.0169		85.8862	4.74224		85.6249	6.70267		85.025	5.82156		86.919	10.0618		65.1703	19.3209		85.5221	12.1691		64.2682	22.4575		65.2446	5.17237
84.1598	13.0169		86.1364	4.74223		85.8759	6.70266		85.2763	5.82049		87.1705	10.0618		65.3395	19.3207		85.7725	12.169		64.4351	22.4574		65.4125	5.17233
84.4114	13.0168		86.3873	4.74223		86.1267	6.70265		85.5268	5.81937		87.421	10.0617		65.5068	19.3206		86.0229	12.1689		64.6037	22.4573		65.5797	5.17228
84.6616	13.0168		86.6381	4.74223		86.3772	6.70265		85.7781	5.81817		87.6709	10.0617		65.6752	19.3205		86.2732	12.1688		64.7723	22.4572		65.747	5.17224
84.9117	13.0168		86.8895	4.74224		86.6281	6.70264		86.0282	5.81691		87.9218	10.0617		65.8425	19.3203		86.5227	12.1687		64.9395	22.4571		65.9148	5.1722
85.163	13.0168		87.1405	4.74225		86.8788	6.70264		86.2784	5.8156		88.1721	10.0617		66.0104	19.3202		86.7743	12.1687		65.107	22.4569		66.083	5.17216
85.4146	13.0168		87.3903	4.74224		87.1295	6.70265		86.5295	5.81432		88.4219	10.0616		66.1789	19.3201		87.0243	12.1686		65.2754	22.4568		66.25	5.17211
85.6642	13.0168		87.6414	4.74223		87.3799	6.70266		86.7794	5.81313		88.6731	10.0616		66.3467	19.3199		87.2739	12.1685		65.4431	22.4567		66.4175	5.17208
85.914	13.0168		87.8923	4.74223		87.631	6.70265		87.0302	5.8119		88.9223	10.0616		66.5149	19.3198		87.5243	12.1684		65.612	22.4566		66.5864	5.17203
86.1658	13.0167		88.1425	4.74224		87.883	6.70265		87.2808	5.81054		89.1732	10.0616		66.6826	19.3196		87.7751	12.1683		65.781	22.4565		66.7538	5.17199
86.4161	13.0166		88.3932	4.74223		88.1339	6.70264		87.5307	5.80916		89.4244	10.0616		66.8514	19.3195		88.0262	12.1683		65.9489	22.4564		66.9212	5.17196
86.6661	13.0166		88.6447	4.74224		88.3843	6.70262		87.7815	5.80769		89.6738	10.0615		67.0181	19.3193		88.2756	12.1682		66.1168	22.4563		67.0898	5.17192
86.9171	13.0165		88.8944	4.74225		88.6353	6.70262		88.0328	5.80624		89.9243	10.0615		67.1871	19.3192		88.5261	12.1681		66.2837	22.4562		67.2577	5.17189
87.1673	13.0163		89.1449	4.74224		88.8865	6.70262		88.283	5.80478		90.1754	10.0615		67.3557	19.319		88.7762	12.168		66.4528	22.4561		67.4257	5.17185
87.4182	13.0164		89.3946	4.74223		89.1366	6.70262		88.5335	5.80334		90.4252	10.0614		67.5241	19.3189		89.0268	12.168		66.6226	22.456		67.5918	5.17182
87.6681	13.0164		89.6463	4.74223		89.3867	6.70262		88.784	5.80193		90.6758	10.0614		67.6914	19.3187		89.2766	12.1679		66.7911	22.4559		67.7601	5.17178
87.9196	13.0163		89.8969	4.74223		89.6379	6.70262		89.0336	5.80051		90.9264	10.0614		67.8589	19.3186		89.5275	12.1678		66.9594	22.4558		67.9277	5.17175
88.1708	13.0163		90.147	4.74222		89.888	6.70261		89.2836	5.79905		91.1763	10.0614		68.0273	19.3184		89.7781	12.1678		67.127	22.4557		68.096	5.17172
88.42	13.0162		90.3975	4.74222		90.1395	6.7026		89.5344	5.79754		91.4265	10.0614		68.1967	19.3182		90.0288	12.1677		67.2952	22.4555		68.2638	5.17168
88.6703	13.0161		90.648	4.74223		90.3894	6.7026		89.7848	5.79594		91.6764	10.0613		68.3636	19.3181		90.2792	12.1676		67.4646	22.4554		68.4296	5.17164
88.9213	13.0162		90.8983	4.74223		90.6393	6.7026		90.0351	5.79433		91.927	10.0613		68.5321	19.3179		90.5296	12.1676		67.6339	22.4553		68.5983	5.17161
89.1712	13.0162		91.149	4.74223		90.8907	6.7026		90.2862	5.79273		92.1777	10.0613		68.7002	19.3178		90.7805	12.1675		67.8018	22.4552		68.7653	5.17158
89.4216	13.0161		91.3999	4.74222		91.1417	6.7026		90.5362	5.79121		92.4281	10.0612		68.8685	19.3176		91.0314	12.1674		67.9703	22.455		68.9322	5.17155
89.6732	13.0161		91.6496	4.74222		91.3914	6.70259		90.7869	5.78972		92.6785	10.0612		69.0361	19.3175		91.2823	12.1674		68.1389	22.4549		69.0999	5.17152
89.9226	13.0161		91.9003	4.74222		91.642	6.70259		91.0367	5.78817		92.9285	10.0612		69.2044	19.3173		91.5328	12.1673		68.3066	22.4547		69.2678	5.17148
90.1734	13.0161		92.151	4.74222		91.8934	6.70258		91.2885	5.78661		93.1788	10.0612		69.3724	19.3171		91.7836	12.1672		68.4748	22.4546		69.4351	5.17145
90.4237	13.0161		92.4012	4.74222		92.1432	6.70257		91.5379	5.785		93.4297	10.0611		69.5404	19.317		92.0334	12.1672		68.6426	22.4545		69.6024	5.17141
90.6734	13.0161		92.6523	4.74222		92.3935	6.70256		91.7878	5.78352		93.681	10.0611		69.7086	19.3168		92.2845	12.1671		68.8115	22.4543		69.7697	5.17138
90.9242	13.016		92.9022	4.74222		92.6439	6.70256		92.039	5.78202		93.931	10.0611		69.8763	19.3166		92.5349	12.167		68.9798	22.4542		69.9369	5.17135
91.1757	13.016		93.1539	4.74221		92.8937	6.70256		92.2899	5.7805		94.1803	10.0611		70.0441	19.3165		92.7855	12.167		69.1489	22.4541		70.1052	5.17132
91.4251	13.016		93.4027	4.74221		93.1435	6.70256		92.5401	5.77905		94.4326	10.0611		70.2114	19.3163		93.0371	12.1669		69.3166	22.4539		70.2722	5.1713
91.6749	13.016		93.6539	4.7422		93.395	6.70256		92.7901	5.77756		94.6826	10.061		70.3781	19.3161		93.2877	12.1669		69.4847	22.4538		70.4398	5.17127
91.9253	13.016		93.9037	4.7422		93.6446	6.70256		93.04	5.776		94.9324	10.061		70.5463	19.316		93.5377	12.1668		69.6531	22.4537		70.6076	5.17124
92.1757	13.0159		94.1539	4.7422		93.8945	6.70255		93.2907	5.77446		95.1838	10.061		70.7133	19.3158		93.7891	12.1667		69.8218	22.4535		70.7745	5.17121
92.4262	13.0158		94.4049	4.7422		94.1465	6.70254		93.5409	5.77292		95.4342	10.061		70.8819	19.3156		94.0386	12.1667		69.99	22.4534		70.9419	5.17118
92.6767	13.0158		94.6555	4.7422		94.3965	6.70253		93.7912	5.77138		95.6846	10.0609		71.0486	19.3155		94.2892	12.1666		70.1583	22.4533		71.1107	5.17115
92.9266	13.0158		94.905	4.7422		94.646	6.70253		94.0417	5.76986		95.9361	10.0609		71.2163	19.3153		94.5394	12.1666		70.3274	22.4532		71.2772	5.17113
93.1766	13.0157		95.1569	4.74219		94.8979	6.70253		94.2929	5.7684		96.186	10.0609		71.3842	19.3151		94.7897	12.1665		70.4951	22.4531		71.4436	5.17111
93.4274	13.0156		95.4072	4.74218		95.1465	6.70253		94.5426	5.76694		96.4369	10.0609		71.5506	19.315		95.0404	12.1664		70.663	22.453		71.6114	5.17109
93.6782	13.0156		95.6568	4.74218		95.3974	6.70253		94.7921	5.76553		96.687	10.0608		71.7179	19.3148		95.2898	12.1664		70.8312	22.4528		71.7791	5.17107
93.9287	13.0155		95.9076	4.74218		95.6481	6.70252		95.0434	5.76405		96.9372	10.0608		71.8848	19.3146		95.5408	12.1663		70.9992	22.4527		71.9464	5.17104
94.1787	13.0155		96.1586	4.74218		95.8993	6.70251		95.2938	5.76249		97.1877	10.0608		72.0537	19.3145		95.7907	12.1663		71.1682	22.4525		72.1134	5.17102
94.4299	13.0154		96.4094	4.74219		96.1497	6.70251		95.5441	5.76096		97.4373	10.0607		72.2208	19.3143		96.0407	12.1662		71.3364	22.4523		72.2802	5.17099
94.68	13.0154		96.6595	4.74219		96.3991	6.7025		95.7941	5.7595		97.688	10.0607		72.3884	19.3142		96.2908	12.1661		71.5038	22.4521		72.4476	5.17096
94.9302	13.0154		96.9096	4.74219		96.6496	6.70249		96.0452	5.75807		97.9393	10.0607		72.5558	19.314		96.5397	12.1661		71.672	22.452		72.6143	5.17095
95.1815	13.0154		97.1598	4.74218		96.9001	6.7025		96.2963	5.7567		98.1886	10.0607		72.7222	19.3138		96.7899	12.166		71.8405	22.4518		72.7814	5.17093
95.4315	13.0154		97.4101	4.74217		97.1498	6.7025		96.546	5.75541		98.4395	10.0606		72.8898	19.3137		97.0403	12.166		72.0083	22.4516		72.9484	5.17091
95.682	13.0153		97.6608	4.74217		97.4	6.7025		96.796	5.75422		98.6893	10.0606		73.0557	19.3135		97.2902	12.1659		72.1758	22.4514		73.115	5.17089
95.9325	13.0153		97.9105	4.74217		97.6507	6.70249		97.0466	5.75293		98.9413	10.0606		73.2231	19.3133		97.5403	12.1659		72.3438	22.4513		73.2834	5.17087
96.1834	13.0152		98.1611	4.74217		97.8998	6.70248		97.2975	5.7516		99.1906	10.0605		73.3902	19.3132		97.7904	12.1658		72.5109	22.4511		73.4512	5.17084
96.4344	13.0152		98.4116	4.74217		98.1516	6.70247		97.547	5.75032		99.4413	10.0605		73.5576	19.3131		98.041	12.1657		72.6789	22.4509		73.6171	5.17082
96.6847	13.0152		98.6616	4.74217		98.4029	6.70246		97.798	5.74916		99.6912	10.0605		73.725	19.3129		98.2911	12.1657		72.8459	22.4507		73.785	5.1708
96.9352	13.0152		98.9124	4.74217		98.6523	6.70246		98.049	5.74804		99.9415	10.0605		73.8914	19.3127		98.5411	12.1656		73.0126	22.4506		73.9518	5.17078
97.1861	13.0151		99.1625	4.74216		98.9043	6.70246		98.2995	5.74699		100.192	10.0604		74.0575	19.3126		98.7911	12.1656		73.1803	22.4504		74.1195	5.17076
97.4352	13.015		99.4122	4.74215		99.1537	6.70246		98.5496	5.74596		100.442	10.0604		74.2245	19.3124		99.0405	12.1655		73.3482	22.4503		74.2869	5.17075
97.6865	13.015		99.6633	4.74215		99.4044	6.70245		98.7998	5.74489		100.693	10.0604		74.3903	19.3122		99.2916	12.1655		73.5136	22.4501		74.4552	5.17073
97.9373	13.0149		99.9129	4.74215		99.6543	6.70245		99.0502	5.74386		100.943	10.0603		74.5582	19.3121		99.5412	12.1654		73.6813	22.4499		74.6222	5.17072
98.1877	13.0148		100.163	4.74215		99.9057	6.70244		99.3006	5.74286		101.193	10.0603		74.7248	19.312		99.7928	12.1653		73.8475	22.4498		74.7896	5.1707
98.4369	13.0148		100.412	4.74215		100.156	6.70243		99.5517	5.74192		101.444	10.0603		74.8919	19.3118		100.043	12.1653		74.0161	22.4496		74.9572	5.17068
98.6894	13.0148		100.664	4.74215		100.406	6.70243		99.801	5.74102		101.693	10.0602		75.058	19.3117		100.293	12.1652		74.1819	22.4495		75.1256	5.17066
98.9383	13.0147		100.913	4.74214		100.658	6.70243		100.051	5.74019		101.943	10.0602		75.2245	19.3115		100.543	12.1652		74.3488	22.4493		75.2926	5.17065
99.1893	13.0147		101.164	4.74213		100.907	6.70243		100.302	5.73938		102.194	10.0602		75.391	19.3114		100.794	12.1651		74.5162	22.4492		75.4594	5.17064
99.4393	13.0146		101.415	4.74212		101.158	6.70244		100.552	5.73862		102.443	10.0602		75.5575	19.3112		101.044	12.1651		74.6826	22.449		75.6273	5.17062
99.6916	13.0146		101.665	4.74212		101.409	6.70244		100.803	5.73786		102.693	10.0601		75.7237	19.3111		101.295	12.165		74.8491	22.4489		75.7939	5.17061
99.9391	13.0145		101.914	4.74213		101.658	6.70243		101.053	5.73708		102.942	10.0601		75.8913	19.3109		101.546	12.1649		75.0165	22.4487		75.961	5.17059
100.191	13.0145		102.165	4.74213		101.909	6.70242		101.304	5.73632		103.192	10.0601		76.0567	19.3108		101.796	12.1649		75.1827	22.4486		76.1279	5.17057
100.442	13.0145		102.417	4.74213		102.159	6.70241		101.554	5.73552		103.442	10.0601		76.2251	19.3106		102.047	12.1648		75.349	22.4485		76.2948	5.17055
100.692	13.0145		102.667	4.74213		102.41	6.7024		101.805	5.73476		103.692	10.06		76.3906	19.3105		102.297	12.1648		75.5158	22.4484		76.4626	5.17053
100.942	13.0144		102.917	4.74212		102.66	6.7024		102.055	5.734		103.941	10.06		76.5571	19.3103		102.547	12.1647		75.6836	22.4482		76.6284	5.17051
101.191	13.0144		103.168	4.74211		102.91	6.7024		102.305	5.73324		104.191	10.06		76.7239	19.3102		102.797	12.1647		75.8498	22.4481		76.7963	5.1705
101.442	13.0143		103.419	4.74211		103.16	6.7024		102.556	5.73248		104.441	10.06		76.8914	19.3101		103.047	12.1646		76.0176	22.448		76.9629	5.17049
101.692	13.0143		103.668	4.7421		103.41	6.70239		102.806	5.73172		104.692	10.0599		77.0579	19.3099		103.297	12.1646		76.1836	22.4479		77.1298	5.17048
101.942	13.0143		103.92	4.7421		103.661	6.70239		103.056	5.73096		104.942	10.0599		77.2249	19.3098		103.547	12.1645		76.3498	22.4477		77.2972	5.17046
102.193	13.0142		104.169	4.7421		103.911	6.70238		103.306	5.73019		105.191	10.0599		77.3911	19.3097		103.797	12.1644		76.5173	22.4476		77.4633	5.17044
102.444	13.0142		104.421	4.7421		104.161	6.70237		103.556	5.72941		105.442	10.0599		77.5585	19.3095		104.048	12.1644		76.6834	22.4475		77.63	5.17042
102.693	13.0141		104.671	4.74209		104.41	6.70236		103.806	5.72864		105.692	10.0598		77.7252	19.3094		104.298	12.1643		76.8485	22.4474		77.797	5.17041
102.943	13.014		104.921	4.74208		104.661	6.70237		104.057	5.72788		105.942	10.0598		77.8922	19.3093		104.548	12.1643		77.0158	22.4473		77.9642	5.17039
103.194	13.0139		105.172	4.74207		104.911	6.70237		104.305	5.72712		106.192	10.0598		78.0592	19.3091		104.798	12.1642		77.1827	22.4472		78.1306	5.17038
103.444	13.0138		105.422	4.74207		105.162	6.70237		104.556	5.72636		106.442	10.0597		78.2255	19.309		105.049	12.1641		77.3501	22.447		78.298	5.17037
103.696	13.0138		105.672	4.74207		105.411	6.70237		104.806	5.72562		106.693	10.0597		78.3925	19.3089		105.298	12.1641		77.515	22.4469		78.4636	5.17035
103.945	13.0138		105.922	4.74207		105.662	6.70236		105.056	5.72486		106.944	10.0597		78.559	19.3088		105.548	12.164		77.6824	22.4468		78.6313	5.17034
104.196	13.0137		106.173	4.74207		105.91	6.70235		105.306	5.72411		107.193	10.0597		78.726	19.3086		105.798	12.164		77.8489	22.4467		78.7977	5.17032
104.446	13.0137		106.422	4.74207		106.161	6.70234		105.556	5.72335		107.444	10.0596		78.8927	19.3085		106.048	12.1639		78.015	22.4466		78.9653	5.1703
104.696	13.0136		106.674	4.74206		106.412	6.70233		105.806	5.7226		107.694	10.0596		79.0593	19.3084		106.299	12.1639		78.1818	22.4465		79.1319	5.17029
104.948	13.0136		106.925	4.74205		106.661	6.70233		106.057	5.72186		107.945	10.0596		79.2258	19.3083		106.548	12.1639		78.3484	22.4463		79.298	5.17027
105.197	13.0135		107.175	4.74204		106.912	6.70234		106.306	5.72113		108.194	10.0596		79.3925	19.3081		106.799	12.1638		78.5143	22.4462		79.465	5.17026
105.447	13.0135		107.425	4.74204		107.161	6.70234		106.556	5.7204		108.445	10.0595		79.559	19.308		107.048	12.1638		78.6813	22.4461		79.6317	5.17024
105.698	13.0134		107.675	4.74203		107.412	6.70234		106.807	5.71968		108.695	10.0595		79.7248	19.3079		107.298	12.1637		78.848	22.446		79.7985	5.17023
105.948	13.0134		107.926	4.74203		107.662	6.70234		107.057	5.71896		108.944	10.0595		79.8931	19.3078		107.548	12.1636		79.0138	22.4459		79.9653	5.17022
106.197	13.0133		108.176	4.74203		107.912	6.70233		107.307	5.71824		109.195	10.0595		80.0586	19.3077		107.799	12.1636		79.1815	22.4458		80.1322	5.17021
106.447	13.0133		108.427	4.74203		108.162	6.70232		107.556	5.71752		109.445	10.0595		80.2245	19.3075		108.049	12.1635		79.3482	22.4457		80.2996	5.17019
106.698	13.0132		108.677	4.74202		108.413	6.70232		107.807	5.71681		109.696	10.0594		80.3911	19.3074		108.298	12.1635		79.5139	22.4456		80.4665	5.17018
106.947	13.0132		108.927	4.74201		108.663	6.70232		108.057	5.71611		109.945	10.0594		80.5585	19.3073		108.549	12.1634		79.6803	22.4455		80.6316	5.17016
107.198	13.0131		109.176	4.742		108.912	6.70231		108.307	5.71542		110.196	10.0594		80.7242	19.3072		108.798	12.1634		79.8474	22.4455		80.8002	5.17014
107.449	13.0131		109.428	4.742		109.163	6.70232		108.557	5.71472		110.446	10.0594		80.8904	19.3071		109.047	12.1633		80.0141	22.4454		80.9669	5.17013
107.698	13.013		109.677	4.74199		109.411	6.70231		108.807	5.71404		110.696	10.0594		81.0563	19.307		109.298	12.1633		80.1798	22.4453		81.1334	5.17012
107.949	13.013		109.927	4.742		109.661	6.7023		109.058	5.71335		110.946	10.0594		81.2231	19.3068		109.547	12.1632		80.3466	22.4452		81.3007	5.17011
108.198	13.0129		110.177	4.74199		109.911	6.7023		109.308	5.71267		111.196	10.0593		81.3902	19.3067		109.797	12.1632		80.5131	22.4452		81.4676	5.17009
108.449	13.0128		110.427	4.74198		110.16	6.70229		109.558	5.71199		111.447	10.0593		81.5565	19.3066		110.048	12.1631		80.6799	22.4451		81.6338	5.17008
108.699	13.0128		110.677	4.74197		110.41	6.70228		109.807	5.71132		111.695	10.0593		81.7238	19.3065		110.298	12.1631		80.847	22.4451		81.801	5.17006
108.949	13.0127		110.928	4.74196		110.659	6.70228		110.057	5.71065		111.947	10.0593		81.8907	19.3064		110.547	12.163		81.0141	22.445		81.9675	5.17005
109.199	13.0127		111.178	4.74195		110.91	6.70228		110.308	5.70999		112.197	10.0592		82.0569	19.3063		110.798	12.1629		81.1797	22.4449		82.1348	5.17003
109.448	13.0126		111.428	4.74195		111.158	6.70228		110.557	5.70934		112.447	10.0592		82.2249	19.3062		111.047	12.1629		81.3469	22.4449		82.3015	5.17002
109.698	13.0125		111.678	4.74194		111.41	6.70227		110.807	5.70869		112.697	10.0592		82.3909	19.3061		111.298	12.1628		81.5138	22.4448		82.4685	5.17001
109.95	13.0125		111.928	4.74194		111.658	6.70226		111.057	5.70804		112.948	10.0592		82.5597	19.306		111.549	12.1628		81.6814	22.4447		82.6343	5.17
110.199	13.0124		112.178	4.74194		111.909	6.70225		111.308	5.70739		113.197	10.0592		82.7257	19.3059		111.798	12.1627		81.8478	22.4447		82.8018	5.16999
110.449	13.0123		112.428	4.74193		112.159	6.70224		111.557	5.70675		113.448	10.0591		82.8931	19.3057		112.048	12.1627		82.0138	22.4446		82.9685	5.16997
110.699	13.0123		112.679	4.74192		112.408	6.70223		111.808	5.70613		113.697	10.0591		83.0598	19.3056		112.298	12.1626		82.1801	22.4445		83.1353	5.16996
110.949	13.0122		112.927	4.74191		112.658	6.70223		112.057	5.70551		113.947	10.0591		83.2267	19.3055		112.549	12.1626		82.3481	22.4445		83.3025	5.16995
111.2	13.0122		113.177	4.7419		112.909	6.70223		112.307	5.7049		114.197	10.0591		83.3939	19.3054		112.799	12.1625		82.5149	22.4444		83.4694	5.16993
111.451	13.0121		113.427	4.7419		113.158	6.70224		112.557	5.70429		114.448	10.0591		83.5609	19.3053		113.05	12.1624		82.6802	22.4443		83.6355	5.16993
111.699	13.012		113.678	4.7419		113.408	6.70224		112.807	5.70368		114.697	10.059		83.7283	19.3052		113.299	12.1624		82.8478	22.4443		83.8027	5.16992
111.95	13.012		113.928	4.7419		113.658	6.70223		113.058	5.70308		114.948	10.059		83.8959	19.3051		113.551	12.1623		83.0156	22.4442		83.9689	5.16991
112.2	13.0119		114.179	4.74189		113.91	6.70223		113.307	5.70248		115.197	10.059		84.0618	19.305		113.801	12.1623		83.1806	22.4441		84.1362	5.1699
112.449	13.0118		114.428	4.74189		114.159	6.70222		113.558	5.70189		115.448	10.059		84.2289	19.3049		114.05	12.1622		83.3484	22.444		84.3024	5.16989
112.7	13.0118		114.678	4.74188		114.409	6.70221		113.808	5.70131		115.697	10.059		84.3971	19.3048		114.3	12.1622		83.5155	22.444		84.469	5.16987
112.951	13.0117		114.927	4.74187		114.66	6.70221		114.058	5.70073		115.946	10.059		84.5629	19.3047		114.549	12.1621		83.6813	22.4439		84.6353	5.16986
113.2	13.0116		115.177	4.74186		114.91	6.70221		114.308	5.70016		116.197	10.0589		84.7314	19.3046		114.8	12.1621		83.8483	22.4439		84.8015	5.16985
113.451	13.0115		115.426	4.74186		115.16	6.70221		114.557	5.69959		116.447	10.0589		84.8975	19.3045		115.05	12.162		84.0147	22.4438		84.9698	5.16984
113.7	13.0115		115.676	4.74186		115.41	6.7022		114.808	5.69902		116.696	10.0589		85.0638	19.3044		115.3	12.162		84.1811	22.4437		85.1367	5.16983
113.952	13.0114		115.926	4.74186		115.661	6.70219		115.058	5.69846		116.946	10.0589		85.231	19.3043		115.55	12.1619		84.3479	22.4435		85.3027	5.16982
114.202	13.0113		116.175	4.74186		115.911	6.70218		115.308	5.69789		117.196	10.0588		85.3978	19.3042		115.8	12.1618		84.5143	22.4434		85.4691	5.16982
114.452	13.0112		116.424	4.74186		116.161	6.70218		115.558	5.69734		117.447	10.0588		85.5639	19.3041		116.05	12.1618		84.6816	22.4432		85.6364	5.16981
114.702	13.0112		116.673	4.74185		116.411	6.70218		115.808	5.6968		117.696	10.0588		85.7307	19.304		116.301	12.1617		84.848	22.4431		85.8036	5.1698
114.952	13.0111		116.924	4.74185		116.661	6.70218		116.058	5.69626		117.946	10.0588		85.897	19.304		116.551	12.1617		85.0153	22.443		85.9697	5.16978
115.202	13.011		117.172	4.74185		116.912	6.70217		116.308	5.69573		118.196	10.0588		86.0636	19.3039		116.8	12.1616		85.1821	22.4428		86.1369	5.16977
115.451	13.011		117.422	4.74186		117.161	6.70217		116.557	5.6952		118.446	10.0588		86.2311	19.3038		117.049	12.1616		85.3486	22.4427		86.3037	5.16976
115.702	13.0109		117.671	4.74186		117.412	6.70216		116.807	5.69467		118.695	10.0587		86.3974	19.3037		117.299	12.1615		85.5162	22.4425		86.4705	5.16975
115.951	13.0108		117.919	4.74187		117.663	6.70215		117.055	5.69415		118.946	10.0587		86.5653	19.3036		117.549	12.1615		85.6821	22.4424		86.6373	5.16975
116.202	13.0107		118.168	4.74188		117.913	6.70214		117.306	5.69363		119.196	10.0587		86.7308	19.3035		117.798	12.1614		85.849	22.4422		86.8043	5.16974
116.451	13.0107		118.417	4.74188		118.162	6.70213		117.556	5.69312		119.446	10.0587		86.8974	19.3034		118.048	12.1613		86.0161	22.4421		86.9711	5.16973
116.702	13.0106		118.666	4.74188		118.413	6.70212		117.806	5.69262		119.697	10.0587		87.0633	19.3033		118.298	12.1613		86.1828	22.442		87.1388	5.16972
116.952	13.0105		118.914	4.74189		118.663	6.70212		118.055	5.69212		119.946	10.0587		87.2302	19.3032		118.547	12.1612		86.3507	22.4418		87.3045	5.1697
117.202	13.0104		119.163	4.7419		118.913	6.70212		118.305	5.69163		120.195	10.0587		87.3971	19.3031		118.797	12.1612		86.5169	22.4417		87.4715	5.16969
117.452	13.0104		119.412	4.74192		119.164	6.70212		118.555	5.69113		120.446	10.0587		87.5634	19.303		119.047	12.1611		86.6831	22.4416		87.6384	5.16968
117.702	13.0103		119.661	4.74194		119.414	6.70211		118.804	5.69064		120.695	10.0587		87.7307	19.3029		119.297	12.161		86.8503	22.4415		87.8043	5.16967
117.952	13.0102		119.909	4.74195		119.666	6.70209		119.055	5.69016		120.946	10.0587		87.8963	19.3028		119.547	12.161		87.0173	22.4414		87.9724	5.16966
118.201	13.0101		120.158	4.74196		119.916	6.70208		119.305	5.68968		121.195	10.0587		88.0631	19.3027		119.797	12.1609		87.184	22.4413		88.1386	5.16965
118.451	13.01		120.407	4.74196		120.166	6.70207		119.555	5.68921		121.445	10.0587		88.23	19.3026		120.047	12.1609		87.3511	22.4412		88.3061	5.16964
118.702	13.01		120.656	4.74197		120.417	6.70206		119.805	5.68875		121.694	10.0586		88.3968	19.3026		120.297	12.1608		87.5172	22.4411		88.4729	5.16962
118.951	13.0099		120.905	4.74199		120.668	6.70206		120.054	5.68829		121.944	10.0586		88.5633	19.3025		120.547	12.1608		87.6849	22.4409		88.6393	5.16961
119.201	13.0098		121.154	4.74201		120.918	6.70205		120.305	5.68783		122.194	10.0586		88.7297	19.3024		120.797	12.1607		87.8508	22.4408		88.8068	5.1696
119.451	13.0097		121.404	4.74202		121.169	6.70205		120.555	5.68738		122.443	10.0585		88.8967	19.3023		121.047	12.1606		88.0184	22.4407		88.9732	5.16959
119.701	13.0097		121.653	4.74205		121.418	6.70205		120.806	5.68693		122.693	10.0585		89.0636	19.3022		121.297	12.1606		88.1835	22.4406		89.1404	5.16959
119.951	13.0096		121.901	4.74206		121.669	6.70204		121.055	5.68649		122.943	10.0585		89.2306	19.3021		121.548	12.1605		88.3506	22.4405		89.3071	5.16959
120.2	13.0095		122.152	4.74207		121.919	6.70203		121.305	5.68607		123.191	10.0584		89.3963	19.3021		121.798	12.1605		88.5172	22.4404		89.4738	5.16958
120.45	13.0094		122.403	4.74207		122.17	6.70202		121.555	5.68565		123.442	10.0584		89.5629	19.302		122.049	12.1604		88.6857	22.4403		89.64	5.16956
120.701	13.0093		122.654	4.74208		122.419	6.70202		121.805	5.68523		123.691	10.0584		89.7291	19.3019		122.298	12.1603		88.8503	22.4402		89.8074	5.16955
120.95	13.0092		122.906	4.74208		122.67	6.70202		122.055	5.68482		123.941	10.0583		89.8969	19.3018		122.549	12.1603		89.0178	22.4402		89.9737	5.16954
121.2	13.0092		123.157	4.74209		122.921	6.70201		122.306	5.68441		124.191	10.0583		90.0635	19.3017		122.798	12.1602		89.1842	22.4401		90.1404	5.16953
121.449	13.0091		123.408	4.7421		123.17	6.70201		122.556	5.68401		124.441	10.0583		90.2288	19.3016		123.049	12.1602		89.351	22.44		90.3069	5.16952
121.698	13.009		123.661	4.7421		123.42	6.702		122.806	5.68361		124.692	10.0582		90.3954	19.3015		123.299	12.1601		89.517	22.44		90.4739	5.16952
121.949	13.0089		123.913	4.7421		123.671	6.70199		123.055	5.68321		124.941	10.0582		90.5613	19.3015		123.549	12.1601		89.6845	22.4399		90.6402	5.16951
122.197	13.0088		124.167	4.74209		123.919	6.70197		123.306	5.68281		125.191	10.0582		90.7281	19.3014		123.798	12.16		89.8506	22.4398		90.8074	5.16951
122.448	13.0087		124.42	4.74207		124.17	6.70196		123.555	5.68243		125.441	10.0581		90.8946	19.3013		124.049	12.1599		90.017	22.4398		90.9743	5.16949
122.697	13.0086		124.673	4.74206		124.42	6.70195		123.806	5.68206		125.691	10.0581		91.0605	19.3012		124.298	12.1599		90.1836	22.4398		91.1399	5.16948
122.948	13.0086		124.926	4.74205		124.67	6.70195		124.055	5.68168		125.942	10.0581		91.2272	19.3011		124.548	12.1598		90.3503	22.4397		91.3066	5.16947
123.199	13.0085		125.178	4.74204		124.92	6.70195		124.305	5.68131		126.192	10.0581		91.3945	19.3011		124.798	12.1598		90.5167	22.4397		91.474	5.16946
123.449	13.0084		125.431	4.74202		125.169	6.70195		124.555	5.68094		126.441	10.058		91.5612	19.301		125.048	12.1597		90.6826	22.4396		91.6394	5.16945
123.699	13.0083		125.684	4.742		125.419	6.70194		124.804	5.68058		126.692	10.058		91.7278	19.3009		125.298	12.1596		90.8505	22.4396		91.8058	5.16945
123.949	13.0082		125.936	4.74199		125.668	6.70192		125.053	5.68023		126.942	10.058		91.8931	19.3008		125.548	12.1596		91.016	22.4395		91.9711	5.16944
124.2	13.0081		126.187	4.74196		125.917	6.70191		125.303	5.67988		127.192	10.058		92.0599	19.3007		125.799	12.1595		91.1827	22.4395		92.1368	5.16944
124.45	13.008		126.44	4.74193		126.167	6.7019		125.553	5.67954		127.442	10.0579		92.2263	19.3006		126.048	12.1595		91.349	22.4395		92.3031	5.16943
124.699	13.0079		126.692	4.74191		126.417	6.70189		125.802	5.6792		127.693	10.0579		92.3927	19.3006		126.298	12.1594		91.5161	22.4394		92.4683	5.16942
124.949	13.0078		126.943	4.74189		126.666	6.70189		126.052	5.67886		127.942	10.0579		92.5594	19.3005		126.548	12.1594		91.6815	22.4394		92.6335	5.16941
125.2	13.0077		127.195	4.74188		126.914	6.70189		126.302	5.67853		128.192	10.0579		92.7262	19.3004		126.797	12.1593		91.849	22.4394		92.7988	5.1694
125.449	13.0076		127.446	4.74186		127.164	6.70189		126.553	5.67819		128.442	10.0579		92.8931	19.3003		127.047	12.1592		92.015	22.4393		92.9646	5.16939
125.7	13.0076		127.697	4.74184		127.413	6.70188		126.803	5.67787		128.693	10.0578		93.0593	19.3002		127.297	12.1592		92.181	22.4393		93.1309	5.16939
125.951	13.0075		127.947	4.74182		127.662	6.70187		127.052	5.67755		128.942	10.0578		93.2257	19.3002		127.546	12.1591		92.3483	22.4393		93.2963	5.16938
126.201	13.0074		128.197	4.74179		127.913	6.70186		127.302	5.67724		129.192	10.0578		93.3927	19.3001		127.796	12.1591		92.5143	22.4393		93.4615	5.16937
126.451	13.0073		128.446	4.74176		128.162	6.70185		127.552	5.67694		129.442	10.0578		93.5597	19.3		128.046	12.159		92.6816	22.4393		93.6275	5.16936
126.701	13.0072		128.696	4.74173		128.412	6.70184		127.802	5.67664		129.691	10.0577		93.7263	19.2999		128.296	12.1589		92.8482	22.4393		93.7937	5.16935
126.95	13.0071		128.947	4.74171		128.661	6.70184		128.051	5.67635		129.941	10.0577		93.8927	19.2998		128.547	12.1589		93.0152	22.4392		93.9605	5.16934
127.2	13.007		129.197	4.74169		128.91	6.70184		128.302	5.67605		130.192	10.0577		94.0597	19.2997		128.796	12.1588		93.1823	22.4392		94.127	5.16933
127.45	13.0069		129.446	4.74167		129.16	6.70183		128.551	5.67576		130.441	10.0577		94.2272	19.2997		129.046	12.1587		93.349	22.4392		94.2941	5.16932
127.702	13.0068		129.696	4.74164		129.41	6.70182		128.801	5.67547		130.692	10.0576		94.394	19.2996		129.296	12.1587		93.5156	22.4391		94.4607	5.16931
127.951	13.0067		129.945	4.74162		129.66	6.70181		129.052	5.67518		130.941	10.0576		94.5598	19.2995		129.544	12.1586		93.6824	22.4391		94.6265	5.1693
128.201	13.0066		130.195	4.74159		129.911	6.7018		129.301	5.6749		131.19	10.0576		94.7279	19.2994		129.795	12.1586		93.8483	22.4391		94.7936	5.1693
128.452	13.0065		130.443	4.74155		130.16	6.70179		129.552	5.67462		131.441	10.0575		94.8949	19.2994		130.044	12.1585		94.0155	22.4391		94.961	5.16929
128.701	13.0064		130.692	4.74152		130.411	6.70178		129.801	5.67435		131.691	10.0575		95.0615	19.2993		130.294	12.1585		94.1825	22.439		95.1272	5.16928
128.951	13.0063		130.941	4.7415		130.661	6.70178		130.051	5.67407		131.941	10.0575		95.2282	19.2992		130.543	12.1584		94.3488	22.439		95.2942	5.16927
129.202	13.0062		131.191	4.74148		130.912	6.70178		130.302	5.67379		132.191	10.0575		95.3957	19.2991		130.793	12.1583		94.5149	22.4389		95.4615	5.16925
129.45	13.0061		131.44	4.74146		131.161	6.70178		130.551	5.67351		132.44	10.0574		95.5618	19.299		131.043	12.1583		94.6812	22.4389		95.6283	5.16924
129.701	13.006		131.689	4.74143		131.413	6.70177		130.801	5.67324		132.69	10.0574		95.7296	19.299		131.292	12.1582		94.848	22.4388		95.7941	5.16924
129.951	13.006		131.936	4.7414		131.662	6.70176		131.051	5.67297		132.94	10.0574		95.8968	19.2989		131.542	12.1582		95.0133	22.4388		95.9616	5.16923
130.201	13.0058		132.186	4.74137		131.912	6.70175		131.301	5.6727		133.189	10.0573		96.0627	19.2988		131.793	12.1581		95.1806	22.4387		96.1289	5.16923
130.451	13.0057		132.435	4.74134		132.162	6.70174		131.552	5.67245		133.439	10.0573		96.2302	19.2987		132.042	12.158		95.3461	22.4387		96.2953	5.16922
130.701	13.0056		132.684	4.74132		132.414	6.70173		131.8	5.67219		133.689	10.0573		96.3966	19.2986		132.292	12.158		95.5122	22.4387		96.4622	5.16921
130.951	13.0055		132.933	4.7413		132.663	6.70172		132.051	5.67193		133.938	10.0573		96.563	19.2986		132.542	12.1579		95.6787	22.4386		96.6282	5.16919
131.2	13.0054		133.181	4.74128		132.915	6.70172		132.3	5.67168		134.188	10.0573		96.7297	19.2985		132.792	12.1579		95.846	22.4386		96.7956	5.16918
131.451	13.0053		133.431	4.74125		133.165	6.70172		132.551	5.67143		134.439	10.0572		96.8958	19.2984		133.042	12.1578		96.0123	22.4385		96.9629	5.16917
131.7	13.0052		133.681	4.74123		133.415	6.70172		132.799	5.67118		134.689	10.0572		97.0621	19.2983		133.292	12.1578		96.1784	22.4385		97.129	5.16917
131.951	13.0051		133.93	4.7412		133.666	6.70171		133.05	5.67094		134.938	10.0572		97.2288	19.2983		133.542	12.1577		96.3459	22.4384		97.2947	5.16916
132.199	13.005		134.178	4.74117		133.916	6.70169		133.299	5.6707		135.188	10.0571		97.3954	19.2982		133.791	12.1576		96.5115	22.4384		97.4621	5.16916
132.45	13.0049		134.427	4.74115		134.166	6.70168		133.549	5.67047		135.438	10.0571		97.5615	19.2981		134.042	12.1576		96.6779	22.4384		97.6289	5.16915
132.701	13.0048		134.677	4.74113		134.415	6.70167		133.799	5.67024		135.689	10.0571		97.7279	19.298		134.291	12.1575		96.8452	22.4383		97.7953	5.16913
132.949	13.0047		134.925	4.74111		134.665	6.70166		134.049	5.67		135.938	10.0571		97.8943	19.298		134.541	12.1574		97.0108	22.4383		97.9627	5.16912
133.199	13.0046		135.176	4.74109		134.915	6.70166		134.298	5.66977		136.188	10.057		98.0613	19.2979		134.791	12.1574		97.178	22.4383		98.1289	5.16911
133.448	13.0045		135.426	4.74107		135.164	6.70165		134.548	5.66955		136.438	10.057		98.2271	19.2978		135.039	12.1573		97.3443	22.4382		98.2959	5.1691
133.7	13.0044		135.675	4.74105		135.414	6.70164		134.798	5.66933		136.687	10.057		98.3934	19.2977		135.289	12.1572		97.5117	22.4381		98.463	5.16909
133.949	13.0043		135.925	4.74102		135.664	6.70163		135.047	5.66913		136.937	10.057		98.5602	19.2977		135.54	12.1572		97.6782	22.4379		98.6302	5.16908
134.199	13.0042		136.175	4.741		135.913	6.70162		135.297	5.66892		137.187	10.0569		98.7262	19.2976		135.789	12.1571		97.8454	22.4377		98.7962	5.16908
134.45	13.0041		136.424	4.74097		136.163	6.70161		135.547	5.66872		137.436	10.0569		98.8936	19.2975		136.038	12.1571		98.0119	22.4374		98.9641	5.16908
134.699	13.004		136.674	4.74095		136.412	6.70159		135.796	5.66852		137.687	10.0569		99.0597	19.2974		136.288	12.157		98.1793	22.4371		99.1311	5.16906
134.948	13.0039		136.923	4.74094		136.662	6.70158		136.047	5.66832		137.936	10.0569		99.2261	19.2974		136.537	12.1569		98.3458	22.4368		99.2974	5.16905
135.198	13.0038		137.174	4.74092		136.912	6.70158		136.296	5.66811		138.185	10.0568		99.3926	19.2973		136.786	12.1569		98.5128	22.4366		99.465	5.16904
135.449	13.0037		137.422	4.7409		137.16	6.70158		136.545	5.66791		138.435	10.0568		99.5603	19.2972		137.037	12.1568		98.6795	22.4363		99.6318	5.16903
135.698	13.0036		137.673	4.74087		137.411	6.70157		136.795	5.66771		138.684	10.0568		99.7269	19.2971		137.286	12.1568		98.8452	22.436		99.7991	5.16902
135.948	13.0035		137.923	4.74084		137.66	6.70156		137.045	5.66752		138.934	10.0568		99.8931	19.2971		137.536	12.1567		99.014	22.4358		99.9656	5.16901
136.199	13.0033		138.173	4.74082		137.91	6.70155		137.294	5.66733		139.183	10.0568		100.06	19.297		137.786	12.1566		99.1797	22.4355		100.132	5.16901
136.448	13.0032		138.424	4.7408		138.159	6.70154		137.544	5.66716		139.433	10.0567		100.227	19.2969		138.036	12.1566		99.3469	22.4353		100.298	5.169
136.698	13.0031		138.673	4.74079		138.409	6.70153		137.793	5.66698		139.682	10.0567		100.393	19.2968		138.286	12.1565		99.513	22.435		100.465	5.16899
136.948	13.003		138.923	4.74077		138.658	6.70152		138.043	5.66679		139.931	10.0567		100.56	19.2968		138.535	12.1564		99.6802	22.4348		100.632	5.16897
137.198	13.0029		139.174	4.74075		138.907	6.70152		138.293	5.66661		140.181	10.0567		100.726	19.2967		138.786	12.1564		99.8458	22.4346		100.8	5.16896
137.448	13.0028		139.423	4.74072		139.157	6.70152		138.543	5.66643		140.431	10.0566		100.891	19.2966		139.035	12.1563		100.012	22.4344		100.966	5.16895
137.698	13.0027		139.673	4.7407		139.407	6.70151		138.793	5.66626		140.681	10.0566		101.059	19.2966		139.286	12.1563		100.18	22.4342		101.134	5.16895
137.947	13.0026		139.923	4.74068		139.656	6.70151		139.044	5.66608		140.93	10.0566		101.225	19.2965		139.535	12.1562		100.345	22.434		101.3	5.16894
138.197	13.0025		140.173	4.74065		139.906	6.70149		139.293	5.66591		141.181	10.0566		101.392	19.2964		139.785	12.1561		100.512	22.4338		101.467	5.16893
138.447	13.0023		140.423	4.74063		140.155	6.70147		139.542	5.66574		141.43	10.0565		101.558	19.2964		140.035	12.1561		100.68	22.4336		101.633	5.16891
138.697	13.0022		140.673	4.74062		140.405	6.70146		139.792	5.66558		141.681	10.0565		101.724	19.2963		140.284	12.156		100.846	22.4335		101.801	5.1689
138.946	13.0021		140.923	4.7406		140.654	6.70145		140.042	5.66542		141.93	10.0565		101.89	19.2962		140.535	12.156		101.012	22.4333		101.968	5.16888
139.195	13.002		141.173	4.74058		140.904	6.70145		140.291	5.66525		142.181	10.0565		102.056	19.2962		140.785	12.1559		101.178	22.4331		102.133	5.16888
139.445	13.0019		141.423	4.74055		141.154	6.70144		140.541	5.66509		142.43	10.0564		102.223	19.2961		141.035	12.1558		101.345	22.433		102.3	5.16887
139.696	13.0018		141.673	4.74053		141.405	6.70144		140.791	5.66493		142.68	10.0564		102.389	19.296		141.285	12.1558		101.511	22.4328		102.466	5.16887
139.946	13.0017		141.923	4.7405		141.654	6.70143		141.041	5.66478		142.93	10.0564		102.556	19.2959		141.535	12.1557		101.677	22.4326		102.633	5.16886
140.195	13.0015		142.173	4.74048		141.904	6.70142		141.292	5.66463		143.18	10.0564		102.722	19.2959		141.785	12.1556		101.844	22.4325		102.799	5.16885
140.445	13.0014		142.423	4.74046		142.154	6.7014		141.541	5.66448		143.43	10.0563		102.889	19.2958		142.034	12.1556		102.01	22.4323		102.966	5.16884
140.697	13.0013		142.672	4.74044		142.404	6.70138		141.791	5.66432		143.68	10.0563		103.055	19.2957		142.285	12.1555		102.177	22.4322		103.133	5.16883
140.945	13.0012		142.921	4.74042		142.653	6.70137		142.041	5.66416		143.93	10.0563		103.223	19.2956		142.535	12.1554		102.344	22.432		103.299	5.16882
141.196	13.0011		143.172	4.7404		142.903	6.70137		142.29	5.66401		144.18	10.0563		103.389	19.2956		142.785	12.1554		102.509	22.4319		103.466	5.1688
141.445	13.001		143.422	4.74037		143.153	6.70136		142.541	5.66385		144.429	10.0562		103.556	19.2955		143.035	12.1553		102.676	22.4318		103.633	5.16879
141.695	13.0009		143.672	4.74034		143.404	6.70136		142.79	5.6637		144.678	10.0562		103.722	19.2954		143.284	12.1552		102.842	22.4317		103.799	5.16878
141.946	13.0008		143.921	4.74032		143.653	6.70135		143.04	5.66354		144.928	10.0562		103.89	19.2954		143.535	12.1552		103.008	22.4316		103.966	5.16878
142.195	13.0006		144.17	4.7403		143.903	6.70134		143.291	5.66338		145.178	10.0562		104.056	19.2953		143.784	12.1551		103.175	22.4315		104.132	5.16877
142.444	13.0005		144.42	4.74029		144.153	6.70133		143.54	5.66321		145.427	10.0561		104.223	19.2952		144.034	12.155		103.34	22.4314		104.299	5.16876
142.694	13.0004		144.67	4.74027		144.404	6.70132		143.79	5.66303		145.677	10.0561		104.389	19.2951		144.283	12.155		103.508	22.4313		104.465	5.16875
142.943	13.0003		144.92	4.74025		144.654	6.70131		144.041	5.66286		145.926	10.0561		104.557	19.2951		144.533	12.1549		103.674	22.4312		104.632	5.16873
143.194	13.0002		145.169	4.74023		144.904	6.70131		144.289	5.66269		146.177	10.0561		104.722	19.295		144.784	12.1549		103.841	22.4311		104.798	5.16872
143.444	13.0001		145.419	4.7402		145.154	6.7013		144.539	5.66252		146.427	10.056		104.889	19.295		145.033	12.1548		104.007	22.4311		104.965	5.16871
143.694	13		145.668	4.74017		145.404	6.7013		144.79	5.66236		146.675	10.056		105.055	19.2949		145.284	12.1547		104.173	22.431		105.131	5.1687
143.943	12.9998		145.919	4.74014		145.654	6.70129		145.04	5.6622		146.927	10.056		105.222	19.2948		145.532	12.1547		104.339	22.4309		105.298	5.16869
144.193	12.9997		146.168	4.74012		145.904	6.70127		145.29	5.66204		147.176	10.0559		105.388	19.2947		145.782	12.1546		104.506	22.4309		105.464	5.16869
144.443	12.9996		146.417	4.7401		146.154	6.70126		145.538	5.66189		147.425	10.0559		105.554	19.2947		146.031	12.1545		104.673	22.4308		105.631	5.16867
144.692	12.9995		146.669	4.74008		146.403	6.70125		145.788	5.66174		147.675	10.0559		105.72	19.2946		146.28	12.1545		104.838	22.4307		105.797	5.16866
144.942	12.9994		146.917	4.74005		146.653	6.70124		146.039	5.66158		147.926	10.0558		105.886	19.2946		146.531	12.1544		105.005	22.4306		105.963	5.16865
145.193	12.9992		147.168	4.74002		146.903	6.70124		146.288	5.66144		148.176	10.0558		106.054	19.2945		146.781	12.1543		105.172	22.4305		106.129	5.16864
145.441	12.9991		147.418	4.73999		147.153	6.70123		146.538	5.6613		148.426	10.0558		106.219	19.2944		147.031	12.1543		105.338	22.4304		106.296	5.16864
145.691	12.999		147.668	4.73996		147.403	6.70123		146.787	5.66117		148.675	10.0558		106.386	19.2943		147.281	12.1542		105.505	22.4303		106.463	5.16863
145.941	12.9989		147.918	4.73994		147.653	6.70122		147.039	5.66104		148.925	10.0557		106.552	19.2943		147.531	12.1541		105.671	22.4302		106.629	5.16862
146.192	12.9988		148.168	4.73991		147.902	6.70121		147.287	5.66091		149.175	10.0557		106.719	19.2942		147.78	12.154		105.838	22.4301		106.796	5.16861
146.44	12.9987		148.419	4.73989		148.153	6.70119		147.536	5.66077		149.425	10.0557		106.885	19.2941		148.029	12.154		106.005	22.43		106.963	5.16859
146.69	12.9985		148.669	4.73987		148.403	6.70118		147.785	5.66064		149.673	10.0556		107.052	19.2941		148.28	12.1539		106.171	22.4299		107.129	5.16857
146.939	12.9984		148.917	4.73985		148.652	6.70116		148.035	5.66052		149.923	10.0556		107.218	19.294		148.529	12.1539		106.339	22.4298		107.295	5.16856
147.189	12.9983		149.168	4.73982		148.904	6.70115		148.283	5.6604		150.173	10.0556		107.386	19.2939		148.779	12.1538		106.505	22.4298		107.461	5.16855
147.439	12.9982		149.417	4.73979		149.153	6.70115		148.532	5.66029		150.423	10.0556		107.551	19.2938		149.029	12.1537		106.671	22.4297		107.628	5.16854
147.688	12.998		149.666	4.73976		149.405	6.70114		148.78	5.66019		150.672	10.0556		107.719	19.2938		149.279	12.1537		106.838	22.4296		107.795	5.16853
147.938	12.9979		149.916	4.73973		149.655	6.70113		149.028	5.66009		150.922	10.0555		107.886	19.2937		149.529	12.1536		107.005	22.4295		107.961	5.16852
148.188	12.9978		150.165	4.7397		149.905	6.70112		149.276	5.66		151.171	10.0555		108.052	19.2936		149.778	12.1535		107.171	22.4294		108.128	5.16851
148.438	12.9977		150.414	4.73968		150.155	6.70111		149.523	5.65991		151.42	10.0555		108.218	19.2936		150.028	12.1535		107.338	22.4293		108.293	5.1685
148.688	12.9976		150.665	4.73966		150.408	6.7011		149.772	5.65982		151.671	10.0554		108.385	19.2935		150.278	12.1534		107.505	22.4292		108.46	5.16848
148.938	12.9975		150.914	4.73963		150.657	6.70109		150.019	5.65974		151.921	10.0554		108.552	19.2934		150.527	12.1533		107.671	22.4291		108.626	5.16847
149.187	12.9973		151.163	4.7396		150.907	6.70108		150.266	5.65966		152.171	10.0554		108.718	19.2934		150.777	12.1533		107.837	22.429		108.793	5.16846
149.438	12.9972		151.413	4.73957		151.157	6.70108		150.514	5.65959		152.42	10.0553		108.886	19.2933		151.027	12.1532		108.004	22.4289		108.96	5.16845
149.687	12.9971		151.663	4.73953		151.409	6.70107		150.761	5.65952		152.67	10.0553		109.052	19.2932		151.277	12.1531		108.171	22.4288		109.125	5.16844
149.937	12.997		151.911	4.7395		151.658	6.70106		151.009	5.65945		152.92	10.0553		109.219	19.2932		151.526	12.153		108.337	22.4287		109.292	5.16842
150.187	12.9969		152.162	4.73947		151.907	6.70104		151.257	5.65938		153.171	10.0552		109.385	19.2931		151.776	12.153		108.503	22.4286		109.459	5.1684
150.436	12.9967		152.412	4.73945		152.158	6.70102		151.505	5.65932		153.421	10.0552		109.552	19.293		152.027	12.1529		108.671	22.4285		109.625	5.16839
150.687	12.9966		152.66	4.73943		152.408	6.70101		151.752	5.65926		153.671	10.0552		109.718	19.293		152.276	12.1529		108.837	22.4283		109.792	5.16838
150.936	12.9965		152.91	4.7394		152.657	6.701		152.001	5.6592		153.921	10.0551		109.885	19.2929		152.526	12.1528		109.004	22.4282		109.959	5.16837
151.186	12.9964		153.16	4.73936		152.907	6.701		152.249	5.65914		154.171	10.0551		110.052	19.2928		152.776	12.1527		109.17	22.4281		110.125	5.16836
151.437	12.9962		153.41	4.73932		153.157	6.70099		152.497	5.6591		154.422	10.0551		110.217	19.2927		153.025	12.1526		109.337	22.428		110.291	5.16835
151.686	12.9961		153.66	4.73929		153.407	6.70098		152.746	5.65905		154.672	10.055		110.383	19.2927		153.275	12.1526		109.504	22.4279		110.458	5.16834
151.936	12.996		153.909	4.73926		153.657	6.70097		152.995	5.659		154.921	10.055		110.55	19.2926		153.525	12.1525		109.67	22.4278		110.625	5.16833
152.186	12.9959		154.159	4.73923		153.906	6.70095		153.245	5.65895		155.171	10.055		110.717	19.2925		153.775	12.1524		109.837	22.4277		110.791	5.16831
152.436	12.9958		154.409	4.7392		154.156	6.70093		153.494	5.65889		155.421	10.0549		110.883	19.2925		154.024	12.1524		110.003	22.4276		110.957	5.16829
152.686	12.9956		154.659	4.73918		154.405	6.70091		153.744	5.65884		155.671	10.0549		111.049	19.2924		154.273	12.1523		110.17	22.4275		111.123	5.16828
152.937	12.9955		154.91	4.73915		154.655	6.7009		153.994	5.65878		155.921	10.0549		111.216	19.2923		154.523	12.1522		110.338	22.4274		111.29	5.16827
153.186	12.9954		155.159	4.73912		154.904	6.7009		154.245	5.65873		156.17	10.0548		111.382	19.2923		154.773	12.1521		110.504	22.4273		111.457	5.16826
153.434	12.9953		155.41	4.73908		155.154	6.70089		154.497	5.65868		156.42	10.0548		111.548	19.2922		155.022	12.1521		110.67	22.4272		111.622	5.16825
153.685	12.9951		155.659	4.73904		155.403	6.70089		154.75	5.65862		156.669	10.0548		111.714	19.2921		155.273	12.152		110.837	22.4271		111.789	5.16825
153.935	12.995		155.91	4.73901		155.652	6.70087		155.002	5.65856		156.92	10.0547		111.88	19.292		155.523	12.1519		111.003	22.427		111.955	5.16824
154.185	12.9949		156.16	4.73898		155.902	6.70086		155.255	5.6585		157.169	10.0547		112.047	19.292		155.771	12.1519		111.171	22.4269		112.121	5.16822
154.435	12.9948		156.41	4.73894		156.151	6.70084		155.509	5.65842		157.418	10.0547		112.213	19.2919		156.022	12.1518		111.336	22.4269		112.288	5.16821
154.685	12.9947		156.66	4.73891		156.4	6.70083		155.763	5.65835		157.668	10.0546		112.379	19.2918		156.272	12.1517		111.503	22.4268		112.453	5.1682
154.935	12.9945		156.911	4.73888		156.65	6.70083		156.018	5.65828		157.917	10.0546		112.544	19.2918		156.521	12.1517		111.669	22.4267		112.621	5.16819
155.184	12.9944		157.161	4.73884		156.899	6.70082		156.272	5.65821		158.168	10.0546		112.712	19.2917		156.771	12.1516		111.835	22.4266		112.786	5.16818
155.434	12.9942		157.41	4.7388		157.148	6.70081		156.526	5.65813		158.417	10.0545		112.878	19.2916		157.021	12.1515		112.001	22.4266		112.953	5.16817
155.684	12.9941		157.661	4.73876		157.398	6.7008		156.781	5.65805		158.667	10.0545		113.044	19.2916		157.271	12.1514		112.168	22.4265		113.12	5.16817
155.934	12.994		157.91	4.73872		157.646	6.70079		157.035	5.65796		158.915	10.0545		113.211	19.2915		157.521	12.1514		112.335	22.4264		113.287	5.16815
156.184	12.9939		158.16	4.73869		157.896	6.70077		157.288	5.65787		159.165	10.0544		113.377	19.2914		157.771	12.1513		112.501	22.4264		113.453	5.16814
156.434	12.9938		158.41	4.73866		158.145	6.70076		157.542	5.65777		159.415	10.0544		113.543	19.2914		158.021	12.1512		112.667	22.4263		113.62	5.16812
156.683	12.9936		158.66	4.73862		158.395	6.70074		157.793	5.65768		159.665	10.0544		113.71	19.2913		158.27	12.1511		112.833	22.4263		113.786	5.16811
156.934	12.9935		158.91	4.73858		158.644	6.70074		158.045	5.65759		159.915	10.0543		113.876	19.2912		158.52	12.1511		113	22.4262		113.952	5.1681
157.183	12.9934		159.16	4.73854		158.894	6.70073		158.297	5.65751		160.165	10.0543		114.042	19.2912		158.769	12.151		113.165	22.4262		114.12	5.16809
157.433	12.9932		159.41	4.73849		159.142	6.70072		158.547	5.65741		160.415	10.0542		114.209	19.2911		159.019	12.1509		113.332	22.4261		114.287	5.16808
157.683	12.9931		159.661	4.73845		159.393	6.70071		158.797	5.65731		160.664	10.0542		114.375	19.291		159.268	12.1509		113.497	22.4261		114.453	5.16807
157.933	12.993		159.91	4.73841		159.642	6.70068		159.048	5.6572		160.914	10.0542		114.542	19.291		159.519	12.1508		113.664	22.426		114.619	5.16805
158.183	12.9929		160.16	4.73837		159.893	6.70066		159.298	5.65709		161.163	10.0541		114.71	19.2909		159.768	12.1507		113.831	22.426		114.786	5.16803
158.432	12.9928		160.41	4.73834		160.142	6.70064		159.547	5.65698		161.414	10.0541		114.875	19.2908		160.017	12.1506		113.997	22.4259		114.952	5.16802
158.682	12.9926		160.66	4.7383		160.392	6.70062		159.798	5.65687		161.664	10.0541		115.042	19.2908		160.267	12.1506		114.163	22.4259		115.12	5.16801
158.932	12.9925		160.91	4.73826		160.643	6.70061		160.047	5.65676		161.914	10.054		115.209	19.2907		160.515	12.1505		114.33	22.4258		115.286	5.168
159.183	12.9924		161.159	4.73821		160.893	6.70061		160.296	5.65665		162.163	10.054		115.376	19.2906		160.765	12.1504		114.496	22.4258		115.453	5.16799
159.433	12.9923		161.409	4.73816		161.144	6.7006		160.545	5.65654		162.413	10.054		115.541	19.2905		161.015	12.1503		114.662	22.4257		115.62	5.16798
159.681	12.9921		161.66	4.73811		161.394	6.70058		160.794	5.65642		162.663	10.0539		115.708	19.2905		161.265	12.1502		114.829	22.4257		115.787	5.16797
159.931	12.992		161.909	4.73806		161.645	6.70057		161.044	5.6563		162.913	10.0539		115.875	19.2904		161.515	12.1502		114.996	22.4256		115.953	5.16796
160.181	12.9919		162.158	4.73801		161.895	6.70055		161.293	5.65617		163.163	10.0539		116.041	19.2904		161.763	12.1501		115.162	22.4256		116.12	5.16795
160.429	12.9917		162.407	4.73797		162.144	6.70052		161.543	5.65605		163.412	10.0538		116.207	19.2903		162.013	12.15		115.33	22.4256		116.285	5.16793
160.679	12.9916		162.657	4.73793		162.394	6.7005		161.792	5.65593		163.662	10.0538		116.372	19.2902		162.262	12.1499		115.496	22.4255		116.452	5.16792
160.929	12.9915		162.907	4.73788		162.644	6.70049		162.04	5.65581		163.911	10.0537		116.539	19.2902		162.512	12.1498		115.662	22.4255		116.618	5.16791
161.179	12.9914		163.155	4.73783		162.895	6.70047		162.29	5.65569		164.16	10.0537		116.705	19.2901		162.761	12.1498		115.829	22.4254		116.785	5.1679
161.428	12.9912		163.406	4.73778		163.146	6.70046		162.539	5.65557		164.409	10.0537		116.872	19.29		163.011	12.1497		115.996	22.4254		116.951	5.16789
161.679	12.9911		163.655	4.73773		163.396	6.70045		162.788	5.65544		164.659	10.0536		117.038	19.2899		163.261	12.1496		116.161	22.4254		117.117	5.16788
161.929	12.991		163.905	4.73768		163.646	6.70042		163.037	5.65531		164.909	10.0536		117.204	19.2899		163.51	12.1495		116.328	22.4254		117.283	5.16786
162.179	12.9909		164.154	4.73763		163.896	6.70039		163.286	5.65517		165.159	10.0536		117.37	19.2898		163.76	12.1494		116.494	22.4253		117.45	5.16785
162.428	12.9907		164.404	4.73758		164.145	6.70038		163.535	5.65504		165.408	10.0535		117.537	19.2898		164.01	12.1494		116.66	22.4253		117.616	5.16784
162.679	12.9906		164.653	4.73754		164.396	6.70036		163.784	5.65491		165.657	10.0535		117.704	19.2897		164.26	12.1493		116.827	22.4252		117.783	5.16783
162.928	12.9905		164.903	4.73748		164.646	6.70034		164.033	5.65478		165.907	10.0534		117.871	19.2896		164.509	12.1492		116.993	22.4252		117.948	5.16782
163.178	12.9903		165.153	4.73743		164.895	6.70033		164.282	5.65463		166.157	10.0534		118.037	19.2895		164.759	12.1491		117.159	22.4252		118.114	5.16781
163.427	12.9902		165.403	4.73737		165.146	6.70031		164.532	5.65448		166.407	10.0534		118.204	19.2895		165.009	12.149		117.326	22.4251		118.28	5.1678
163.677	12.9901		165.652	4.73732		165.395	6.70028		164.78	5.65433		166.657	10.0533		118.371	19.2894		165.259	12.1489		117.492	22.4251		118.447	5.16779
163.928	12.99		165.903	4.73727		165.646	6.70026		165.029	5.65416		166.906	10.0533		118.538	19.2893		165.508	12.1489		117.659	22.4251		118.612	5.16777
164.177	12.9898		166.153	4.73722		165.895	6.70023		165.278	5.65401		167.155	10.0533		118.705	19.2893		165.759	12.1488		117.826	22.4251		118.779	5.16775
164.427	12.9897		166.402	4.73717		166.145	6.70021		165.527	5.65386		167.406	10.0532		118.871	19.2892		166.009	12.1487		117.991	22.425		118.945	5.16774
164.677	12.9896		166.653	4.73711		166.395	6.70019		165.776	5.65371		167.655	10.0532		119.037	19.2891		166.26	12.1486		118.158	22.425		119.111	5.16773
164.927	12.9894		166.903	4.73705		166.646	6.70018		166.025	5.65356		167.905	10.0531		119.204	19.289		166.509	12.1485		118.324	22.425		119.277	5.16772
165.176	12.9893		167.152	4.73699		166.895	6.70016		166.274	5.6534		168.155	10.0531		119.37	19.289		166.76	12.1485		118.491	22.4249		119.443	5.16771
165.426	12.9892		167.403	4.73693		167.145	6.70016		166.522	5.65324		168.404	10.0531		119.537	19.2889		167.011	12.1484		118.657	22.4249		119.609	5.1677
165.675	12.9891		167.652	4.73686		167.396	6.70013		166.772	5.65307		168.654	10.053		119.704	19.2888		167.26	12.1483		118.825	22.4249		119.776	5.16769
165.926	12.989		167.901	4.7368		167.646	6.7001		167.021	5.6529		168.904	10.053		119.87	19.2888		167.51	12.1482		118.991	22.4248		119.942	5.16768
166.175	12.9888		168.153	4.73674		167.895	6.70008		167.27	5.65273		169.154	10.0529		120.036	19.2887		167.76	12.1482		119.157	22.4248		120.108	5.16766
166.426	12.9887		168.401	4.73669		168.144	6.70006		167.518	5.65256		169.404	10.0529		120.203	19.2886		168.01	12.1481		119.323	22.4248		120.275	5.16765
166.676	12.9885		168.652	4.73663		168.394	6.70004		167.768	5.65239		169.653	10.0528		120.37	19.2886		168.259	12.148		119.49	22.4247		120.441	5.16763
166.925	12.9884		168.902	4.73656		168.644	6.70002		168.017	5.65222		169.903	10.0528		120.536	19.2885		168.51	12.1479		119.656	22.4247		120.607	5.16762
167.175	12.9883		169.151	4.73649		168.893	6.70001		168.267	5.65205		170.153	10.0527		120.703	19.2884		168.759	12.1478		119.822	22.4247		120.775	5.16761
167.423	12.9882		169.402	4.73642		169.141	6.69998		168.516	5.65187		170.402	10.0527		120.87	19.2884		169.009	12.1478		119.989	22.4247		120.94	5.16761
167.675	12.988		169.652	4.73635		169.393	6.69996		168.766	5.65169		170.652	10.0527		121.036	19.2883		169.258	12.1477		120.155	22.4247		121.107	5.1676
167.924	12.9879		169.902	4.73628		169.642	6.69994		169.015	5.6515		170.902	10.0526		121.202	19.2882		169.509	12.1476		120.322	22.4246		121.274	5.16758
168.174	12.9878		170.151	4.73621		169.89	6.69992		169.264	5.65132		171.151	10.0526		121.369	19.2882		169.759	12.1475		120.487	22.4246		121.44	5.16757
168.423	12.9877		170.401	4.73615		170.139	6.69989		169.514	5.65113		171.401	10.0525		121.536	19.2881		170.008	12.1474		120.654	22.4246		121.608	5.16756
168.674	12.9875		170.652	4.73608		170.389	6.69987		169.764	5.65095		171.651	10.0525		121.702	19.288		170.258	12.1473		120.82	22.4245		121.775	5.16755
168.922	12.9874		170.901	4.73601		170.637	6.69985		170.012	5.65076		171.901	10.0525		121.869	19.288		170.508	12.1473		120.986	22.4245		121.941	5.16754
169.173	12.9873		171.15	4.73594		170.887	6.69983		170.262	5.65056		172.151	10.0524		122.035	19.2879		170.758	12.1472		121.154	22.4245		122.107	5.16753
169.423	12.9871		171.4	4.73586		171.136	6.6998		170.512	5.65036		172.401	10.0524		122.202	19.2878		171.007	12.1471		121.319	22.4244		122.274	5.16752
169.672	12.987		171.65	4.73578		171.385	6.69977		170.761	5.65015		172.65	10.0523		122.368	19.2878		171.257	12.147		121.486	22.4244		122.441	5.16751
169.923	12.9869		171.899	4.73571		171.634	6.69974		171.01	5.64994		172.901	10.0523		122.534	19.2877		171.506	12.1469		121.653	22.4243		122.609	5.16749
170.173	12.9868		172.15	4.73564		171.883	6.69971		171.259	5.64974		173.151	10.0522		122.7	19.2876		171.756	12.1468		121.819	22.4243		122.775	5.16748
170.423	12.9866		172.399	4.73557		172.134	6.69969		171.51	5.64954		173.401	10.0522		122.867	19.2876		172.005	12.1468		121.985	22.4242		122.942	5.16747
170.672	12.9865		172.649	4.7355		172.383	6.69966		171.759	5.64934		173.651	10.0521		123.034	19.2875		172.255	12.1467		122.152	22.4241		123.108	5.16746
170.922	12.9864		172.899	4.73541		172.632	6.69964		172.01	5.64914		173.9	10.0521		123.2	19.2874		172.505	12.1466		122.319	22.4239		123.275	5.16745
171.173	12.9862		173.149	4.73533		172.882	6.69963		172.259	5.64893		174.15	10.0521		123.367	19.2873		172.755	12.1465		122.485	22.4238		123.442	5.16744
171.421	12.9861		173.397	4.73524		173.132	6.69961		172.509	5.64871		174.4	10.052		123.532	19.2873		173.005	12.1464		122.651	22.4237		123.608	5.16742
171.672	12.986		173.647	4.73516		173.381	6.69958		172.758	5.64849		174.65	10.052		123.699	19.2872		173.254	12.1463		122.818	22.4236		123.775	5.16741
171.922	12.9858		173.897	4.73508		173.632	6.69955		173.008	5.64827		174.899	10.0519		123.866	19.2872		173.504	12.1462		122.984	22.4235		123.942	5.16739
172.171	12.9857		174.147	4.735		173.881	6.69952		173.257	5.64806		175.149	10.0519		124.032	19.2871		173.754	12.1461		123.151	22.4234		124.109	5.16738
172.421	12.9855		174.395	4.73493		174.13	6.69949		173.507	5.64784		175.398	10.0518		124.198	19.287		174.004	12.1461		123.318	22.4233		124.275	5.16736
172.671	12.9854		174.645	4.73485		174.38	6.69947		173.756	5.64761		175.648	10.0518		124.365	19.287		174.254	12.146		123.484	22.4232		124.442	5.16735
172.92	12.9853		174.894	4.73476		174.63	6.69944		174.006	5.64738		175.897	10.0517		124.531	19.2869		174.504	12.1459		123.651	22.4231		124.609	5.16734
173.17	12.9852		175.144	4.73467		174.88	6.69942		174.256	5.64715		176.147	10.0517		124.698	19.2868		174.754	12.1458		123.817	22.423		124.774	5.16732
173.42	12.985		175.392	4.73458		175.13	6.69939		174.506	5.6469		176.396	10.0516		124.865	19.2868		175.003	12.1457		123.984	22.4229		124.941	5.16731
173.67	12.9849		175.643	4.73449		175.379	6.69936		174.755	5.64666		176.647	10.0516		125.031	19.2867		175.254	12.1456		124.151	22.4228		125.107	5.16729
173.919	12.9848		175.892	4.73439		175.629	6.69933		175.005	5.64641		176.896	10.0515		125.197	19.2866		175.504	12.1455		124.317	22.4227		125.273	5.16728
174.17	12.9846		176.142	4.73431		175.878	6.6993		175.255	5.64617		177.145	10.0515		125.363	19.2866		175.753	12.1455		124.484	22.4226		125.44	5.16726
174.419	12.9845		176.392	4.73422		176.129	6.69927		175.505	5.64592		177.394	10.0514		125.529	19.2865		176.004	12.1454		124.65	22.4225		125.606	5.16724
174.669	12.9844		176.641	4.73413		176.378	6.69924		175.755	5.64566		177.644	10.0514		125.696	19.2864		176.252	12.1453		124.818	22.4224		125.773	5.16723
174.919	12.9842		176.891	4.73404		176.628	6.69921		176.005	5.6454		177.894	10.0513		125.862	19.2863		176.502	12.1452		124.984	22.4223		125.939	5.16723
175.169	12.9841		177.141	4.73394		176.88	6.69918		176.255	5.64514		178.143	10.0513		126.028	19.2863		176.752	12.1451		125.15	22.4223		126.106	5.16721
175.419	12.984		177.392	4.73383		177.13	6.69915		176.505	5.64486		178.393	10.0512		126.195	19.2862		177.002	12.145		125.318	22.4222		126.273	5.1672
175.669	12.9839		177.641	4.73373		177.38	6.69911		176.755	5.64459		178.642	10.0512		126.361	19.2862		177.252	12.1449		125.483	22.4221		126.438	5.16719
175.918	12.9837		177.891	4.73362		177.629	6.69907		177.005	5.64432		178.892	10.0511		126.528	19.2861		177.501	12.1448		125.65	22.422		126.605	5.16717
176.168	12.9836		178.141	4.73352		177.88	6.69904		177.255	5.64404		179.142	10.0511		126.693	19.286		177.751	12.1448		125.816	22.4219		126.772	5.16715
176.417	12.9835		178.39	4.73342		178.13	6.699		177.505	5.64376		179.392	10.051		126.859	19.2859		178	12.1447		125.983	22.4219		126.937	5.16714
176.667	12.9833		178.64	4.73331		178.38	6.69898		177.755	5.64347		179.641	10.051		127.026	19.2859		178.249	12.1446		126.15	22.4218		127.103	5.16713
176.917	12.9832		178.89	4.7332		178.63	6.69895		178.005	5.64318		179.891	10.0509		127.192	19.2858		178.5	12.1445		126.315	22.4217		127.271	5.16713
177.167	12.9831		179.14	4.73309		178.881	6.69892		178.255	5.64287		180.141	10.0509		127.358	19.2858		178.748	12.1444		126.481	22.4216		127.437	5.16712
177.417	12.9829		179.389	4.73297		179.131	6.69888		178.504	5.64257		180.39	10.0508		127.525	19.2857		178.998	12.1443		126.648	22.4216		127.603	5.1671
177.666	12.9828		179.639	4.73285		179.381	6.69884		178.754	5.64226		180.641	10.0508		127.691	19.2856		179.248	12.1442		126.813	22.4215		127.77	5.16709
177.916	12.9827		179.888	4.73273		179.632	6.6988		179.004	5.64194		180.891	10.0507		127.857	19.2856		179.498	12.1441		126.98	22.4214		127.936	5.16707
178.166	12.9825		180.138	4.73262		179.883	6.69876		179.254	5.64163		181.141	10.0506		128.023	19.2855		179.746	12.1441		127.146	22.4214		128.103	5.16706
178.416	12.9824		180.387	4.73251		180.132	6.69872		179.504	5.6413		181.39	10.0506		128.19	19.2854		179.997	12.144		127.313	22.4213		128.268	5.16705
178.665	12.9823		180.637	4.73239		180.383	6.69869		179.753	5.64097		181.64	10.0505		128.357	19.2853		180.246	12.1439		127.478	22.4212		128.435	5.16703
178.915	12.9822		180.888	4.73227		180.632	6.69865		180.002	5.64064		181.891	10.0505		128.523	19.2853		180.497	12.1438		127.646	22.4212		128.602	5.16702
179.166	12.982		181.137	4.73215		180.883	6.69862		180.252	5.6403		182.14	10.0504		128.69	19.2852		180.746	12.1437		127.813	22.4211		128.768	5.16701
179.415	12.9819		181.386	4.73202		181.132	6.69858		180.502	5.63995		182.39	10.0503		128.857	19.2851		180.996	12.1436		127.978	22.4211		128.934	5.16699
179.664	12.9817		181.637	4.73189		181.382	6.69853		180.752	5.6396		182.64	10.0503		129.023	19.2851		181.245	12.1435		128.145	22.421		129.1	5.16698
179.914	12.9816		181.885	4.73176		181.632	6.69849		181.002	5.63924		182.89	10.0502		129.189	19.285		181.496	12.1434		128.312	22.4209		129.267	5.16697
180.164	12.9815		182.135	4.73164		181.883	6.69845		181.251	5.63889		183.14	10.0502		129.356	19.2849		181.745	12.1433		128.477	22.4209		129.433	5.16696
180.414	12.9814		182.386	4.73152		182.134	6.69841		181.5	5.63853		183.389	10.0501		129.522	19.2849		181.995	12.1432		128.644	22.4208		129.599	5.16695
180.663	12.9812		182.635	4.7314		182.383	6.69837		181.751	5.63816		183.641	10.05		129.688	19.2848		182.245	12.1431		128.811	22.4207		129.766	5.16695
180.912	12.9811		182.885	4.73127		182.632	6.69833		182	5.63778		183.89	10.05		129.855	19.2847		182.494	12.143		128.977	22.4207		129.932	5.16694
181.163	12.981		183.134	4.73113		182.883	6.69829		182.25	5.63739		184.14	10.0499		130.022	19.2847		182.744	12.1429		129.144	22.4206		130.098	5.16693
181.411	12.9808		183.384	4.73099		183.132	6.69825		182.5	5.63699		184.39	10.0498		130.188	19.2846		182.994	12.1428		129.31	22.4206		130.266	5.16692
181.662	12.9807		183.634	4.73085		183.382	6.6982		182.75	5.63659		184.639	10.0498		130.354	19.2845		183.243	12.1427		129.477	22.4205		130.431	5.1669
181.912	12.9806		183.883	4.7307		183.633	6.69815		183	5.63619		184.89	10.0497		130.521	19.2845		183.493	12.1426		129.642	22.4204		130.599	5.16689
182.161	12.9804		184.133	4.73056		183.884	6.6981		183.248	5.63579		185.139	10.0497		130.688	19.2844		183.743	12.1426		129.808	22.4204		130.765	5.16688
182.412	12.9803		184.382	4.73042		184.133	6.69807		183.498	5.63537		185.388	10.0496		130.855	19.2843		183.993	12.1425		129.974	22.4203		130.931	5.16687
182.661	12.9802		184.633	4.73028		184.383	6.69802		183.748	5.63495		185.639	10.0495		131.02	19.2842		184.242	12.1424		130.141	22.4203		131.098	5.16687
182.911	12.98		184.883	4.73013		184.632	6.69798		183.999	5.63452		185.887	10.0495		131.187	19.2842		184.492	12.1423		130.307	22.4203		131.264	5.16686
183.162	12.9799		185.133	4.72998		184.882	6.69793		184.248	5.63408		186.137	10.0494		131.353	19.2841		184.742	12.1422		130.474	22.4202		131.43	5.16685
183.411	12.9798		185.384	4.72982		185.132	6.69788		184.498	5.63364		186.387	10.0493		131.519	19.284		184.992	12.1421		130.641	22.4202		131.597	5.16684
183.662	12.9796		185.633	4.72966		185.382	6.69782		184.748	5.63319		186.637	10.0492		131.685	19.284		185.242	12.142		130.806	22.4201		131.764	5.16682
183.911	12.9795		185.883	4.7295		185.631	6.69777		184.997	5.63275		186.887	10.0492		131.852	19.2839		185.491	12.1419		130.974	22.4201		131.931	5.1668
184.161	12.9794		186.133	4.72935		185.881	6.69772		185.247	5.6323		187.136	10.0491		132.018	19.2838		185.741	12.1418		131.139	22.42		132.097	5.16678
184.41	12.9793		186.383	4.72919		186.13	6.69767		185.497	5.63184		187.386	10.049		132.185	19.2838		185.991	12.1417		131.305	22.42		132.263	5.16677
184.66	12.9791		186.633	4.72902		186.381	6.69762		185.746	5.63136		187.634	10.0489		132.352	19.2837		186.24	12.1416		131.472	22.4199		132.429	5.16676
184.909	12.979		186.883	4.72885		186.63	6.69757		185.996	5.63088		187.885	10.0488		132.519	19.2836		186.49	12.1415		131.638	22.4199		132.595	5.16675
185.16	12.9788		187.132	4.72868		186.88	6.69752		186.246	5.63039		188.134	10.0488		132.685	19.2836		186.739	12.1414		131.804	22.4198		132.762	5.16673
185.41	12.9787		187.382	4.7285		187.129	6.69746		186.495	5.6299		188.384	10.0487		132.852	19.2835		186.989	12.1413		131.971	22.4198		132.929	5.16671
185.66	12.9786		187.633	4.72833		187.379	6.6974		186.745	5.6294		188.634	10.0486		133.018	19.2834		187.238	12.1412		132.137	22.4198		133.095	5.16669
185.909	12.9785		187.882	4.72815		187.629	6.69733		186.994	5.6289		188.883	10.0485		133.185	19.2834		187.488	12.1411		132.304	22.4197		133.262	5.16667
186.158	12.9783		188.133	4.72798		187.879	6.69728		187.244	5.62841		189.133	10.0485		133.351	19.2833		187.738	12.141		132.47	22.4197		133.429	5.16666
186.41	12.9782		188.383	4.72781		188.129	6.69722		187.493	5.62791		189.382	10.0484		133.518	19.2832		187.987	12.1409		132.637	22.4196		133.595	5.16665
186.659	12.978		188.633	4.72763		188.378	6.69717		187.744	5.6274		189.632	10.0483		133.684	19.2832		188.237	12.1408		132.803	22.4196		133.761	5.16664
186.909	12.9779		188.882	4.72745		188.628	6.69711		187.993	5.62688		189.881	10.0482		133.851	19.2831		188.486	12.1408		132.971	22.4195		133.927	5.16663
187.16	12.9778		189.133	4.72726		188.877	6.69704		188.243	5.62635		190.131	10.0481		134.017	19.283		188.736	12.1407		133.136	22.4195		134.093	5.16662
187.41	12.9777		189.383	4.72707		189.127	6.69698		188.492	5.62582		190.381	10.048		134.184	19.283		188.986	12.1406		133.303	22.4194		134.26	5.1666
187.659	12.9775		189.633	4.72687		189.378	6.69691		188.742	5.62528		190.63	10.048		134.349	19.2829		189.235	12.1405		133.469	22.4194		134.426	5.16658
187.91	12.9774		189.883	4.72668		189.627	6.69684		188.992	5.62473		190.88	10.0479		134.516	19.2828		189.485	12.1404		133.636	22.4194		134.592	5.16657
188.159	12.9773		190.133	4.72648		189.877	6.69679		189.241	5.62418		191.129	10.0478		134.682	19.2828		189.734	12.1403		133.801	22.4193		134.757	5.16655
188.409	12.9771		190.383	4.72629		190.126	6.69672		189.49	5.62362		191.38	10.0477		134.85	19.2827		189.984	12.1402		133.968	22.4192		134.923	5.16653
188.658	12.977		190.634	4.72609		190.377	6.69666		189.741	5.62305		191.629	10.0476		135.015	19.2826		190.233	12.1401		134.134	22.4192		135.091	5.16652
188.908	12.9769		190.883	4.72589		190.626	6.69659		189.991	5.62246		191.878	10.0475		135.182	19.2826		190.483	12.14		134.3	22.4191		135.257	5.16651
189.158	12.9767		191.134	4.72568		190.875	6.69651		190.24	5.62188		192.128	10.0474		135.347	19.2825		190.731	12.1399		134.466	22.4191		135.423	5.16649
189.407	12.9766		191.383	4.72547		191.125	6.69644		190.49	5.62129		192.377	10.0473		135.514	19.2824		190.981	12.1398		134.633	22.4191		135.589	5.16648
189.658	12.9765		191.634	4.72526		191.375	6.69636		190.74	5.6207		192.627	10.0473		135.68	19.2824		191.231	12.1397		134.799	22.419		135.755	5.16646
189.908	12.9763		191.884	4.72504		191.624	6.69628		190.99	5.6201		192.877	10.0472		135.846	19.2823		191.481	12.1396		134.965	22.419		135.92	5.16644
190.157	12.9762		192.134	4.72483		191.875	6.69621		191.239	5.61948		193.127	10.0471		136.014	19.2822		191.73	12.1395		135.131	22.419		136.087	5.16642
190.407	12.9761		192.384	4.72461		192.125	6.69614		191.489	5.61885		193.376	10.047		136.179	19.2821		191.98	12.1394		135.298	22.4189		136.252	5.16641
190.658	12.9759		192.633	4.72439		192.374	6.69607		191.739	5.61821		193.626	10.0468		136.345	19.2821		192.229	12.1393		135.465	22.4189		136.419	5.1664
190.907	12.9758		192.884	4.72416		192.623	6.696		191.988	5.61755		193.875	10.0468		136.512	19.282		192.479	12.1392		135.63	22.4189		136.586	5.16639
191.158	12.9757		193.133	4.72393		192.874	6.69592		192.238	5.61689		194.125	10.0467		136.678	19.2819		192.731	12.1391		135.797	22.4189		136.752	5.16637
191.408	12.9755		193.384	4.7237		193.123	6.69584		192.488	5.61623		194.375	10.0466		136.844	19.2819		192.98	12.139		135.964	22.4188		136.918	5.16635
191.657	12.9754		193.634	4.72346		193.373	6.69575		192.738	5.61556		194.625	10.0465		137.011	19.2818		193.23	12.1389		136.13	22.4188		137.085	5.16633
191.907	12.9753		193.883	4.72322		193.623	6.69567		192.988	5.61489		194.874	10.0464		137.178	19.2817		193.479	12.1388		136.296	22.4188		137.25	5.16632
192.157	12.9751		194.134	4.72298		193.873	6.69559		193.237	5.6142		195.124	10.0463		137.343	19.2816		193.729	12.1387		136.462	22.4187		137.418	5.1663
192.406	12.975		194.383	4.72274		194.123	6.69551		193.487	5.6135		195.375	10.0462		137.51	19.2816		193.979	12.1386		136.629	22.4187		137.584	5.16629
192.656	12.9748		194.633	4.7225		194.372	6.69543		193.737	5.61278		195.624	10.0461		137.677	19.2815		194.228	12.1385		136.795	22.4187		137.75	5.16627
192.906	12.9747		194.882	4.72225		194.622	6.69534		193.986	5.61205		195.875	10.046		137.843	19.2814		194.479	12.1384		136.962	22.4186		137.916	5.16626
193.156	12.9746		195.132	4.722		194.872	6.69524		194.237	5.61131		196.124	10.0459		138.009	19.2814		194.728	12.1383		137.128	22.4186		138.084	5.16624
193.406	12.9744		195.382	4.72173		195.122	6.69515		194.486	5.61057		196.374	10.0458		138.176	19.2813		194.979	12.1382		137.296	22.4186		138.25	5.16622
193.656	12.9743		195.632	4.72146		195.372	6.69506		194.736	5.60982		196.625	10.0457		138.342	19.2812		195.229	12.1381		137.462	22.4186		138.417	5.16621
193.906	12.9742		195.881	4.72119		195.622	6.69497		194.985	5.60906		196.875	10.0456		138.509	19.2812		195.479	12.138		137.629	22.4185		138.584	5.16619
194.155	12.974		196.131	4.72093		195.871	6.69488		195.236	5.60829		197.123	10.0455		138.675	19.2811		195.729	12.1379		137.796	22.4185		138.75	5.16618
194.404	12.9739		196.381	4.72066		196.12	6.69479		195.486	5.60745		197.373	10.0454		138.841	19.281		195.979	12.1378		137.962	22.4185		138.917	5.16616
194.655	12.9738		196.63	4.72039		196.371	6.69469		195.735	5.60658		197.623	10.0453		139.008	19.281		196.229	12.1377		138.129	22.4184		139.083	5.16616
194.904	12.9736		196.88	4.72012		196.62	6.69458		195.985	5.60571		197.872	10.0452		139.174	19.2809		196.479	12.1376		138.296	22.4184		139.249	5.16614
195.154	12.9735		197.131	4.71983		196.87	6.69448		196.235	5.60481		198.123	10.045		139.341	19.2808		196.729	12.1375		138.461	22.4184		139.416	5.16613
195.404	12.9734		197.381	4.71954		197.119	6.69437		196.485	5.60393		198.372	10.0449		139.507	19.2808		196.978	12.1374		138.628	22.4184		139.582	5.16611
195.654	12.9732		197.63	4.71924		197.369	6.69426		196.734	5.60303		198.621	10.0448		139.675	19.2807		197.228	12.1373		138.795	22.4183		139.748	5.16609
195.904	12.9731		197.88	4.71895		197.617	6.69416		196.984	5.60209		198.871	10.0447		139.841	19.2806		197.477	12.1372		138.961	22.4183		139.915	5.16607
196.153	12.9729		198.13	4.71865		197.867	6.69406		197.234	5.60103		199.12	10.0446		140.007	19.2805		197.727	12.1371		139.128	22.4183		140.082	5.16606
196.403	12.9728		198.379	4.71836		198.116	6.69396		197.484	5.59989		199.37	10.0445		140.174	19.2805		197.976	12.137		139.295	22.4182		140.248	5.16604
196.653	12.9727		198.63	4.71806		198.365	6.69385		197.733	5.59872		199.62	10.0444		140.34	19.2804		198.225	12.1369		139.459	22.4182		140.415	5.16603
196.903	12.9725		198.88	4.71775		198.615	6.69374		197.983	5.59761		199.87	10.0442		140.507	19.2803		198.475	12.1367		139.625	22.4182		140.58	5.16601
197.152	12.9724		199.13	4.71744		198.864	6.69362		198.233	5.59655		200.12	10.0441		140.673	19.2803		198.725	12.1366		139.792	22.4182		140.747	5.16599
197.402	12.9723		199.38	4.71712		199.113	6.69349		198.483	5.59548		200.369	10.044		140.84	19.2802		198.974	12.1365		139.958	22.4181		140.914	5.16597
197.652	12.9721		199.63	4.7168		199.363	6.69338		198.732	5.59435		200.619	10.0439		141.006	19.2801		199.224	12.1364		140.125	22.4181		141.081	5.16595
197.901	12.972		199.879	4.71647		199.611	6.69326		198.982	5.59318		200.869	10.0438		141.173	19.28		199.474	12.1363		140.29	22.4181		141.247	5.16593
198.152	12.9718		200.129	4.71615		199.861	6.69314		199.231	5.59188		201.119	10.0436		141.339	19.28		199.723	12.1362		140.458	22.418		141.412	5.16591
198.401	12.9717		200.378	4.71583		200.11	6.69303		199.481	5.59054		201.368	10.0435		141.506	19.2799		199.973	12.1361		140.624	22.418		141.58	5.16589
198.651	12.9716		200.629	4.71549		200.36	6.69291		199.73	5.58916		201.619	10.0434		141.673	19.2798		200.223	12.136		140.79	22.4179		141.746	5.16587
198.9	12.9715		200.877	4.71515		200.609	6.69279		199.98	5.58778		201.868	10.0433		141.839	19.2798		200.473	12.1359		140.956	22.4179		141.913	5.16585
199.149	12.9713		201.128	4.71481		200.858	6.69266		200.23	5.58644		202.118	10.0431		142.005	19.2797		200.723	12.1358		141.123	22.4178		142.079	5.16583
199.4	12.9712		201.377	4.71445		201.109	6.69253		200.48	5.58515		202.368	10.043		142.171	19.2796		200.973	12.1357		141.289	22.4178		142.244	5.16581
199.65	12.971		201.627	4.71409		201.358	6.6924		200.729	5.58377		202.617	10.0429		142.337	19.2796		201.224	12.1356		141.455	22.4177		142.412	5.16579
199.899	12.9709		201.877	4.71373		201.608	6.69227		200.979	5.58232		202.868	10.0427		142.504	19.2795		201.473	12.1355		141.622	22.4177		142.578	5.16577
200.149	12.9707		202.127	4.71338		201.858	6.69214		201.228	5.58084		203.117	10.0426		142.67	19.2794		201.723	12.1354		141.788	22.4176		142.744	5.16576
200.399	12.9706		202.376	4.71302		202.107	6.692		201.478	5.57931		203.366	10.0425		142.836	19.2793		201.973	12.1353		141.954	22.4176		142.91	5.16574
200.648	12.9705		202.624	4.71265		202.358	6.69186		201.727	5.57776		203.616	10.0424		143.002	19.2793		202.222	12.1351		142.12	22.4175		143.078	5.16572
200.898	12.9703		202.875	4.71228		202.608	6.69171		201.977	5.57619		203.866	10.0422		143.169	19.2792		202.473	12.135		142.288	22.4174		143.245	5.1657
201.148	12.9702		203.124	4.71189		202.857	6.69156		202.226	5.57457		204.116	10.0421		143.334	19.2792		202.723	12.1349		142.454	22.4174		143.411	5.16569
201.397	12.9701		203.374	4.7115		203.108	6.6914		202.476	5.57295		204.367	10.0419		143.5	19.2791		202.973	12.1348		142.62	22.4173		143.577	5.16567
201.647	12.9699		203.624	4.71111		203.358	6.69126		202.726	5.57135		204.615	10.0418		143.666	19.279		203.222	12.1347		142.787	22.4171		143.744	5.16565
201.897	12.9698		203.874	4.71071		203.608	6.69112		202.976	5.5697		204.866	10.0416		143.832	19.2789		203.472	12.1346		142.952	22.417		143.911	5.16563
202.147	12.9696		204.123	4.71031		203.859	6.69097		203.225	5.56792		205.115	10.0415		143.998	19.2789		203.722	12.1345		143.119	22.4169		144.077	5.16562
202.396	12.9695		204.374	4.70991		204.108	6.69082		203.475	5.56617		205.366	10.0414		144.164	19.2788		203.972	12.1344		143.286	22.4168		144.244	5.1656
202.646	12.9694		204.624	4.7095		204.358	6.69066		203.725	5.56449		205.616	10.0412		144.33	19.2787		204.222	12.1343		143.451	22.4166		144.412	5.16559
202.896	12.9692		204.874	4.70909		204.609	6.69049		203.974	5.56289		205.866	10.0411		144.498	19.2787		204.472	12.1342		143.618	22.4165		144.577	5.16557
203.147	12.9691		205.123	4.70867		204.859	6.69032		204.225	5.56134		206.115	10.0409		144.664	19.2786		204.722	12.1341		143.785	22.4164		144.743	5.16554
203.396	12.9689		205.374	4.70824		205.11	6.69016		204.475	5.55969		206.366	10.0408		144.831	19.2785		204.972	12.134		143.951	22.4163		144.908	5.16552
203.646	12.9688		205.625	4.70781		205.36	6.68999		204.724	5.55792		206.615	10.0406		144.996	19.2784		205.221	12.1338		144.117	22.4162		145.075	5.1655
203.897	12.9686		205.874	4.70738		205.611	6.68982		204.975	5.55608		206.864	10.0404		145.164	19.2784		205.472	12.1337		144.283	22.416		145.242	5.16549
204.147	12.9685		206.124	4.70693		205.861	6.68966		205.225	5.55411		207.114	10.0403		145.331	19.2783		205.721	12.1336		144.45	22.4159		145.407	5.16547
204.396	12.9684		206.375	4.70649		206.113	6.68948		205.474	5.55211		207.364	10.0401		145.497	19.2782		205.971	12.1335		144.617	22.4158		145.574	5.16545
204.646	12.9682		206.624	4.70604		206.362	6.6893		205.725	5.55012		207.613	10.04		145.664	19.2782		206.221	12.1334		144.783	22.4157		145.739	5.16543
204.896	12.9681		206.874	4.70559		206.613	6.68911		205.974	5.54809		207.862	10.0398		145.83	19.2781		206.47	12.1333		144.949	22.4156		145.906	5.16541
205.146	12.968		207.124	4.70513		206.864	6.68892		206.225	5.54618		208.112	10.0396		145.998	19.278		206.72	12.1332		145.116	22.4155		146.072	5.16539
205.395	12.9678		207.374	4.70465		207.113	6.68872		206.475	5.54428		208.361	10.0395		146.164	19.278		206.969	12.133		145.282	22.4154		146.237	5.16537
205.646	12.9677		207.624	4.70418		207.363	6.68853		206.724	5.5423		208.61	10.0393		146.329	19.2779		207.219	12.1329		145.448	22.4153		146.403	5.16536
205.896	12.9675		207.873	4.70369		207.614	6.68834		206.974	5.54018		208.86	10.0391		146.496	19.2778		207.468	12.1328		145.614	22.4152		146.569	5.16534
206.147	12.9674		208.123	4.70321		207.864	6.68815		207.224	5.53796		209.11	10.039		146.664	19.2777		207.718	12.1327		145.781	22.4151		146.734	5.16533
206.396	12.9672		208.373	4.70272		208.114	6.68795		207.474	5.53568		209.359	10.0388		146.83	19.2777		207.968	12.1326		145.948	22.415		146.901	5.16531
206.645	12.9671		208.623	4.70223		208.363	6.68773		207.723	5.53355		209.609	10.0386		146.995	19.2776		208.217	12.1325		146.114	22.4149		147.067	5.1653
206.896	12.967		208.872	4.70173		208.615	6.68752		207.973	5.53142		209.859	10.0385		147.162	19.2775		208.466	12.1324		146.281	22.4147		147.232	5.16528
207.145	12.9668		209.123	4.70122		208.864	6.6873		208.223	5.5294		210.109	10.0383		147.328	19.2774		208.715	12.1322		146.447	22.4147		147.399	5.16525
207.394	12.9667		209.373	4.7007		209.113	6.68708		208.472	5.52731		210.358	10.0381		147.495	19.2774		208.966	12.1321		146.613	22.4145		147.564	5.16523
207.645	12.9665		209.622	4.70017		209.364	6.68687		208.722	5.52519		210.608	10.0379		147.662	19.2773		209.215	12.132		146.781	22.4144		147.732	5.16522
207.894	12.9664		209.872	4.69965		209.613	6.68664		208.97	5.52302		210.858	10.0377		147.828	19.2772		209.465	12.1319		146.947	22.4144		147.898	5.1652
208.145	12.9662		210.121	4.69912		209.863	6.68642		209.22	5.52077		211.107	10.0376		147.995	19.2771		209.715	12.1318		147.113	22.4143		148.064	5.16519
208.395	12.9661		210.371	4.69858		210.113	6.68619		209.471	5.51849		211.358	10.0374		148.161	19.277		209.965	12.1317		147.281	22.4142		148.23	5.16517
208.644	12.966		210.621	4.69804		210.363	6.68596		209.72	5.51616		211.607	10.0372		148.327	19.277		210.215	12.1315		147.447	22.4141		148.397	5.16515
208.894	12.9658		210.871	4.69749		210.612	6.68572		209.97	5.51393		211.857	10.037		148.494	19.2769		210.464	12.1314		147.613	22.414		148.564	5.16513
209.143	12.9657		211.12	4.69693		210.862	6.68547		210.219	5.51176		212.107	10.0368		148.661	19.2768		210.714	12.1313		147.779	22.4139		148.731	5.1651
209.394	12.9655		211.37	4.69636		211.111	6.68522		210.469	5.50951		212.356	10.0366		148.827	19.2768		210.964	12.1312		147.946	22.4138		148.898	5.16508
209.643	12.9654		211.62	4.69578		211.36	6.68498		210.72	5.50719		212.606	10.0364		148.994	19.2767		211.214	12.1311		148.112	22.4138		149.065	5.16507
209.892	12.9652		211.87	4.69519		211.608	6.68473		210.969	5.50473		212.856	10.0362		149.161	19.2766		211.462	12.131		148.279	22.4137		149.232	5.16505
210.143	12.9651		212.12	4.6946		211.858	6.68448		211.218	5.50221		213.105	10.036		149.327	19.2765		211.712	12.1308		148.446	22.4136		149.399	5.16503
210.392	12.965		212.369	4.694		212.106	6.68423		211.468	5.49971		213.356	10.0358		149.493	19.2765		211.961	12.1307		148.611	22.4135		149.566	5.16501
210.642	12.9648		212.619	4.69339		212.356	6.68397		211.717	5.4972		213.605	10.0356		149.661	19.2764		212.21	12.1306		148.777	22.4134		149.732	5.16499
210.891	12.9647		212.869	4.69278		212.606	6.6837		211.968	5.49486		213.855	10.0354		149.828	19.2763		212.46	12.1305		148.944	22.4134		149.899	5.16497
211.141	12.9645		213.119	4.69216		212.853	6.68342		212.218	5.49254		214.105	10.0352		149.993	19.2763		212.709	12.1304		149.111	22.4133		150.065	5.16494
211.392	12.9644		213.369	4.69154		213.103	6.68315		212.468	5.49021		214.355	10.0349		150.16	19.2762		212.959	12.1303		149.277	22.4132		150.231	5.16492
211.642	12.9642		213.619	4.6909		213.352	6.68287		212.718	5.48774		214.605	10.0347		150.326	19.2761		213.209	12.1301		149.444	22.4131		150.399	5.1649
211.891	12.9641		213.868	4.69025		213.602	6.68259		212.968	5.48515		214.854	10.0345		150.493	19.276		213.459	12.13		149.61	22.4131		150.565	5.16488
212.141	12.964		214.118	4.68961		213.851	6.6823		213.218	5.48242		215.104	10.0343		150.659	19.276		213.708	12.1299		149.777	22.413		150.732	5.16487
212.391	12.9638		214.368	4.68895		214.101	6.68201		213.467	5.47977		215.353	10.034		150.825	19.2759		213.958	12.1298		149.942	22.4129		150.897	5.16485
212.641	12.9637		214.619	4.68829		214.35	6.68171		213.716	5.47706		215.603	10.0338		150.993	19.2758		214.208	12.1296		150.108	22.4128		151.065	5.16482
212.89	12.9635		214.868	4.68762		214.6	6.6814		213.967	5.47451		215.853	10.0336		151.158	19.2757		214.458	12.1295		150.276	22.4128		151.231	5.1648
213.139	12.9634		215.118	4.68694		214.849	6.68109		214.217	5.47191		216.103	10.0333		151.323	19.2757		214.707	12.1294		150.441	22.4127		151.398	5.16478
213.391	12.9632		215.368	4.68624		215.099	6.68078		214.467	5.46933		216.352	10.0331		151.49	19.2756		214.957	12.1293		150.608	22.4126		151.565	5.16476
213.64	12.9631		215.618	4.68554		215.349	6.68046		214.716	5.46663		216.602	10.0329		151.656	19.2755		215.208	12.1291		150.775	22.4126		151.731	5.16474
213.89	12.9629		215.867	4.68483		215.6	6.68015		214.966	5.46377		216.852	10.0326		151.822	19.2754		215.457	12.129		150.94	22.4125		151.898	5.16473
214.14	12.9628		216.116	4.68412		215.849	6.67983		215.215	5.46078		217.101	10.0324		151.988	19.2754		215.707	12.1289		151.107	22.4124		152.065	5.16471
214.389	12.9627		216.366	4.6834		216.099	6.6795		215.465	5.45781		217.351	10.0321		152.155	19.2753		215.957	12.1288		151.274	22.4123		152.231	5.16469
214.638	12.9625		216.616	4.68267		216.35	6.67916		215.715	5.45489		217.601	10.0318		152.321	19.2752		216.206	12.1287		151.44	22.4123		152.397	5.16466
214.889	12.9624		216.867	4.68194		216.599	6.67882		215.964	5.45198		217.85	10.0316		152.487	19.2752		216.456	12.1285		151.606	22.4122		152.564	5.16464
215.139	12.9622		217.116	4.6812		216.85	6.67846		216.213	5.44912		218.1	10.0313		152.652	19.2751		216.706	12.1284		151.772	22.4122		152.731	5.16462
215.388	12.962		217.365	4.68043		217.101	6.67811		216.463	5.44628		218.351	10.0311		152.819	19.275		216.956	12.1283		151.939	22.4121		152.898	5.1646
215.638	12.9619		217.616	4.67964		217.35	6.67775		216.713	5.44342		218.599	10.0308		152.984	19.2749		217.205	12.1282		152.106	22.412		153.064	5.16458
215.888	12.9618		217.865	4.67887		217.601	6.6774		216.963	5.44031		218.849	10.0305		153.15	19.2749		217.455	12.128		152.273	22.412		153.231	5.16456
216.139	12.9616		218.115	4.67807		217.851	6.67704		217.212	5.43715		219.1	10.0303		153.316	19.2748		217.704	12.1279		152.438	22.4119		153.397	5.16454
216.388	12.9615		218.365	4.67727		218.102	6.67666		217.462	5.434		219.348	10.0299		153.482	19.2747		217.954	12.1278		152.605	22.4118		153.563	5.16452
216.637	12.9613		218.615	4.67648		218.352	6.67628		217.712	5.43107		219.597	10.0296		153.648	19.2746		218.204	12.1277		152.772	22.4118		153.73	5.16449
216.887	12.9612		218.865	4.67567		218.601	6.67589		217.962	5.42809		219.847	10.0293		153.815	19.2746		218.454	12.1275		152.937	22.4117		153.897	5.16447
217.137	12.961		219.115	4.67482		218.851	6.67549		218.211	5.42506		220.096	10.029		153.981	19.2745		218.704	12.1274		153.104	22.4117		154.063	5.16445
217.387	12.9609		219.364	4.67391		219.102	6.67509		218.461	5.422		220.345	10.0288		154.149	19.2744		218.953	12.1273		153.27	22.4116		154.229	5.16443
217.637	12.9607		219.614	4.67297		219.352	6.67468		218.712	5.41871		220.594	10.0284		154.314	19.2743		219.203	12.1272		153.437	22.4115		154.396	5.16442
217.887	12.9606		219.864	4.67197		219.602	6.67428		218.961	5.41535		220.843	10.0281		154.48	19.2743		219.453	12.127		153.603	22.4115		154.562	5.1644
218.136	12.9604		220.115	4.671		219.852	6.67386		219.211	5.41188		221.094	10.0278		154.646	19.2742		219.703	12.1269		153.77	22.4114		154.73	5.16438
218.386	12.9603		220.364	4.67004		220.102	6.67345		219.46	5.40853		221.342	10.0275		154.811	19.2741		219.952	12.1268		153.937	22.4113		154.896	5.16435
218.636	12.9601		220.614	4.66909		220.352	6.67302		219.709	5.4052		221.592	10.0272		154.978	19.274		220.201	12.1266		154.102	22.4113		155.062	5.16433
218.885	12.96		220.864	4.6681		220.603	6.67258		219.96	5.40195		221.842	10.0269		155.144	19.274		220.45	12.1265		154.268	22.4112		155.228	5.16431
219.136	12.9598		221.115	4.66709		220.853	6.67213		220.209	5.39868		222.091	10.0266		155.31	19.2739		220.699	12.1264		154.435	22.4111		155.394	5.1643
219.386	12.9597		221.363	4.66594		221.103	6.67167		220.458	5.39537		222.341	10.0262		155.477	19.2738		220.949	12.1262		154.601	22.4111		155.56	5.16428
219.635	12.9595		221.613	4.66477		221.353	6.67122		220.708	5.39197		222.592	10.0259		155.642	19.2737		221.199	12.1261		154.767	22.411		155.727	5.16426
219.885	12.9594		221.864	4.6636		221.603	6.67076		220.958	5.38838		222.842	10.0255		155.81	19.2737		221.448	12.126		154.933	22.4109		155.893	5.16424
220.135	12.9592		222.114	4.66249		221.853	6.67029		221.207	5.38471		223.092	10.0252		155.976	19.2736		221.698	12.1259		155.1	22.4108		156.058	5.16422
220.384	12.9591		222.363	4.66139		222.103	6.66981		221.457	5.38103		223.343	10.0248		156.142	19.2735		221.947	12.1257		155.266	22.4108		156.225	5.1642
220.635	12.9589		222.613	4.66021		222.352	6.66932		221.706	5.37755		223.591	10.0245		156.308	19.2735		222.196	12.1256		155.433	22.4107		156.392	5.16418
220.883	12.9588		222.863	4.65898		222.602	6.66883		221.956	5.37401		223.842	10.0241		156.475	19.2734		222.446	12.1255		155.6	22.4107		156.558	5.16416
221.135	12.9586		223.113	4.65772		222.853	6.66832		222.205	5.3705		224.092	10.0238		156.641	19.2733		222.697	12.1253		155.766	22.4106		156.725	5.16414
221.385	12.9585		223.363	4.65638		223.102	6.66782		222.455	5.36684		224.341	10.0234		156.808	19.2732		222.947	12.1252		155.932	22.4106		156.891	5.16412
221.634	12.9583		223.613	4.65505		223.352	6.66731		222.705	5.36322		224.592	10.023		156.974	19.2731		223.197	12.1251		156.099	22.4105		157.056	5.1641
221.884	12.9582		223.862	4.65368		223.602	6.66679		222.955	5.35949		224.841	10.0226		157.14	19.2731		223.448	12.125		156.265	22.4105		157.224	5.16408
222.134	12.958		224.111	4.65236		223.851	6.66626		223.204	5.35578		225.09	10.0222		157.307	19.273		223.696	12.1248		156.431	22.4105		157.389	5.16406
222.383	12.9579		224.362	4.65106		224.101	6.66572		223.455	5.352		225.34	10.0218		157.474	19.2729		223.946	12.1247		156.597	22.4104		157.556	5.16404
222.633	12.9577		224.61	4.64975		224.352	6.66517		223.704	5.34815		225.589	10.0214		157.641	19.2728		224.196	12.1245		156.764	22.4104		157.722	5.16402
222.882	12.9575		224.861	4.6484		224.601	6.66461		223.954	5.34429		225.84	10.021		157.808	19.2727		224.447	12.1244		156.931	22.4103		157.889	5.164
223.133	12.9574		225.11	4.64697		224.851	6.66404		224.203	5.34043		226.09	10.0206		157.975	19.2727		224.696	12.1243		157.097	22.4103		158.055	5.16398
223.383	12.9573		225.362	4.64545		225.101	6.66347		224.454	5.33643		226.339	10.0202		158.142	19.2726		224.946	12.1241		157.263	22.4102		158.222	5.16396
223.632	12.9571		225.611	4.64388		225.35	6.6629		224.704	5.33223		226.59	10.0198		158.308	19.2725		225.196	12.124		157.429	22.4102		158.389	5.16394
223.882	12.957		225.861	4.6423		225.601	6.66231		224.952	5.32798		226.839	10.0193		158.476	19.2724		225.445	12.1238		157.596	22.4101		158.556	5.16391
224.134	12.9568		226.11	4.64078		225.851	6.66171		225.201	5.32377		227.089	10.0189		158.642	19.2724		225.695	12.1237		157.762	22.4101		158.722	5.16389
224.383	12.9566		226.36	4.63929		226.1	6.6611		225.45	5.31953		227.34	10.0185		158.809	19.2723		225.946	12.1236		157.929	22.4101		158.888	5.16387
224.632	12.9565		226.61	4.63781		226.35	6.66047		225.7	5.31532		227.589	10.018		158.976	19.2722		226.194	12.1234		158.095	22.41		159.054	5.16385
224.883	12.9563		226.859	4.6363		226.6	6.65984		225.949	5.3111		227.839	10.0176		159.142	19.2721		226.444	12.1233		158.261	22.41		159.221	5.16382
225.132	12.9562		227.11	4.6347		226.849	6.6592		226.199	5.30685		228.089	10.0171		159.308	19.2721		226.694	12.1231		158.428	22.4099		159.386	5.16381
225.381	12.956		227.359	4.63297		227.099	6.65855		226.449	5.30239		228.339	10.0166		159.475	19.272		226.943	12.123		158.593	22.4099		159.553	5.16379
225.631	12.9559		227.609	4.63123		227.348	6.6579		226.699	5.29799		228.589	10.0162		159.642	19.2719		227.193	12.1229		158.76	22.4099		159.72	5.16377
225.882	12.9557		227.857	4.62949		227.598	6.65724		226.948	5.29356		228.838	10.0157		159.808	19.2718		227.443	12.1227		158.926	22.4098		159.886	5.16374
226.132	12.9556		228.109	4.62785		227.848	6.65656		227.198	5.28897		229.088	10.0152		159.975	19.2718		227.693	12.1226		159.093	22.4098		160.051	5.16372
226.381	12.9554		228.358	4.62615		228.098	6.65587		227.448	5.28443		229.337	10.0147		160.141	19.2717		227.942	12.1224		159.26	22.4097		160.219	5.16369
226.63	12.9552		228.609	4.62448		228.347	6.65516		227.698	5.27996		229.587	10.0142		160.308	19.2716		228.192	12.1223		159.427	22.4097		160.385	5.16367
226.88	12.9551		228.858	4.62278		228.596	6.65444		227.947	5.27542		229.837	10.0137		160.474	19.2715		228.443	12.1222		159.593	22.4096		160.551	5.16365
227.131	12.9549		229.107	4.62098		228.846	6.65372		228.197	5.27078		230.087	10.0132		160.64	19.2714		228.693	12.122		159.759	22.4096		160.718	5.16363
227.38	12.9548		229.357	4.61908		229.096	6.65299		228.447	5.26609		230.335	10.0127		160.806	19.2714		228.942	12.1219		159.926	22.4095		160.884	5.16361
227.629	12.9547		229.607	4.61718		229.345	6.65226		228.697	5.26131		230.584	10.0121		160.972	19.2713		229.192	12.1218		160.092	22.4095		161.049	5.16358
227.879	12.9545		229.858	4.61535		229.595	6.65151		228.946	5.2564		230.835	10.0116		161.138	19.2712		229.441	12.1216		160.259	22.4094		161.216	5.16355
228.13	12.9543		230.107	4.61355		229.845	6.65075		229.197	5.25136		231.084	10.011		161.305	19.2711		229.691	12.1215		160.426	22.4094		161.382	5.16353
228.38	12.9542		230.357	4.61173		230.095	6.64994		229.447	5.24664		231.334	10.0105		161.471	19.2711		229.941	12.1213		160.592	22.4093		161.549	5.1635
228.629	12.954		230.607	4.60992		230.345	6.64909		229.697	5.24184		231.584	10.0099		161.637	19.271		230.191	12.1212		160.759	22.4093		161.715	5.16348
228.878	12.9539		230.856	4.60801		230.595	6.64822		229.947	5.23692		231.835	10.0093		161.803	19.2709		230.44	12.121		160.925	22.4093		161.883	5.16347
229.129	12.9537		231.107	4.60606		230.845	6.64729		230.198	5.23188		232.084	10.0087		161.97	19.2708		230.691	12.1209		161.091	22.4092		162.048	5.16345
229.379	12.9536		231.357	4.60403		231.095	6.64635		230.448	5.22668		232.334	10.0081		162.137	19.2707		230.941	12.1207		161.258	22.4092		162.216	5.16343
229.628	12.9534		231.607	4.60197		231.344	6.64543		230.697	5.22148		232.584	10.0075		162.304	19.2707		231.191	12.1206		161.424	22.4091		162.382	5.16341
229.878	12.9533		231.856	4.59993		231.595	6.64452		230.947	5.21617		232.834	10.0069		162.47	19.2706		231.44	12.1204		161.591	22.4091		162.548	5.16339
230.129	12.9531		232.107	4.59802		231.844	6.64359		231.198	5.21105		233.083	10.0063		162.638	19.2705		231.69	12.1203		161.757	22.409		162.715	5.16336
230.378	12.9529		232.356	4.59609		232.094	6.64256		231.447	5.2058		233.333	10.0057		162.805	19.2704		231.94	12.1202		161.924	22.409		162.881	5.16334
230.627	12.9528		232.606	4.59415		232.345	6.64146		231.697	5.20049		233.583	10.0051		162.971	19.2704		232.189	12.12		162.09	22.4089		163.047	5.16332
230.877	12.9526		232.856	4.59215		232.595	6.64025		231.947	5.1952		233.833	10.0044		163.138	19.2703		232.439	12.1199		162.256	22.4089		163.213	5.1633
231.127	12.9525		233.106	4.5901		232.845	6.63905		232.197	5.18983		234.082	10.0037		163.305	19.2702		232.689	12.1197		162.423	22.4088		163.38	5.16328
231.377	12.9523		233.355	4.58799		233.094	6.63788		232.446	5.18421		234.333	10.0031		163.472	19.2701		232.939	12.1196		162.589	22.4087		163.546	5.16325
231.626	12.9521		233.606	4.58579		233.345	6.63673		232.696	5.17863		234.583	10.0024		163.638	19.27		233.189	12.1194		162.757	22.4087		163.713	5.16322
231.876	12.952		233.855	4.58351		233.594	6.63557		232.946	5.17282		234.832	10.0017		163.805	19.27		233.439	12.1192		162.922	22.4086		163.878	5.1632
232.126	12.9518		234.105	4.58132		233.844	6.6343		233.196	5.167		235.081	10.001		163.972	19.2699		233.689	12.1191		163.09	22.4086		164.044	5.16317
232.376	12.9517		234.356	4.57917		234.094	6.63291		233.445	5.16131		235.331	10.0003		164.138	19.2698		233.939	12.1189		163.256	22.4085		164.211	5.16315
232.625	12.9515		234.606	4.57706		234.344	6.63138		233.694	5.15545		235.581	9.99956		164.304	19.2697		234.188	12.1188		163.422	22.4084		164.376	5.16312
232.875	12.9513		234.855	4.57494		234.595	6.62979		233.944	5.14984		235.831	9.99881		164.47	19.2696		234.438	12.1187		163.589	22.4084		164.543	5.1631
233.125	12.9512		235.104	4.57272		234.844	6.62827		234.194	5.14396		236.081	9.99806		164.636	19.2696		234.687	12.1185		163.756	22.4083		164.71	5.16308
233.374	12.951		235.355	4.57044		235.094	6.62683		234.443	5.13801		236.33	9.99731		164.803	19.2695		234.937	12.1184		163.921	22.4082		164.876	5.16305
233.624	12.9509		235.605	4.56814		235.344	6.62545		234.692	5.13179		236.58	9.99655		164.969	19.2694		235.188	12.1182		164.088	22.4082		165.043	5.16303
233.875	12.9507		235.855	4.56572		235.594	6.62396		234.942	5.12562		236.83	9.99574		165.136	19.2693		235.436	12.118		164.254	22.4081		165.209	5.16299
234.125	12.9505		236.105	4.56348		235.844	6.62244		235.191	5.11948		237.081	9.99487		165.301	19.2692		235.686	12.1179		164.421	22.4081		165.377	5.16297
234.375	12.9504		236.354	4.56128		236.094	6.6208		235.44	5.11329		237.331	9.99394		165.468	19.2692		235.935	12.1177		164.587	22.408		165.542	5.16294
234.625	12.9502		236.603	4.55902		236.343	6.61905		235.691	5.10716		237.58	9.99299		165.635	19.2691		236.185	12.1176		164.753	22.408		165.709	5.16292
234.875	12.95		236.853	4.55668		236.593	6.61726		235.94	5.1008		237.831	9.99206		165.802	19.269		236.434	12.1174		164.92	22.4079		165.875	5.1629
235.125	12.9499		237.103	4.5543		236.843	6.61551		236.19	5.09455		238.08	9.99112		165.968	19.2689		236.684	12.1173		165.087	22.4078		166.042	5.16288
235.374	12.9497		237.354	4.55179		237.093	6.61385		236.44	5.08803		238.329	9.99018		166.135	19.2689		236.933	12.1171		165.253	22.4078		166.209	5.16286
235.625	12.9496		237.602	4.54925		237.343	6.61221		236.69	5.08138		238.58	9.98916		166.302	19.2688		237.183	12.117		165.42	22.4077		166.374	5.16282
235.874	12.9494		237.852	4.54678		237.593	6.61046		236.939	5.07467		238.828	9.98804		166.468	19.2687		237.433	12.1168		165.586	22.4077		166.541	5.1628
236.124	12.9492		238.102	4.54439		237.843	6.60869		237.189	5.06807		239.079	9.98688		166.635	19.2686		237.682	12.1167		165.752	22.4076		166.708	5.16277
236.373	12.9491		238.351	4.54205		238.094	6.60679		237.438	5.06147		239.329	9.98564		166.802	19.2685		237.932	12.1165		165.919	22.4076		166.875	5.16275
236.623	12.9489		238.601	4.53969		238.343	6.60482		237.688	5.05488		239.578	9.98437		166.967	19.2684		238.183	12.1164		166.085	22.4075		167.042	5.16273
236.875	12.9488		238.851	4.53721		238.593	6.60279		237.938	5.04817		239.828	9.98315		167.135	19.2684		238.432	12.1162		166.252	22.4074		167.208	5.1627
237.122	12.9486		239.1	4.53462		238.843	6.60079		238.187	5.0412		240.077	9.98189		167.302	19.2683		238.682	12.116		166.418	22.4074		167.374	5.16268
237.374	12.9484		239.35	4.53196		239.093	6.59885		238.437	5.03427		240.327	9.98061		167.467	19.2682		238.932	12.1159		166.583	22.4073		167.54	5.16266
237.623	12.9483		239.6	4.52929		239.343	6.59694		238.688	5.02716		240.577	9.9792		167.635	19.2681		239.182	12.1157		166.75	22.4072		167.707	5.16263
237.873	12.9481		239.849	4.52655		239.592	6.59502		238.937	5.02004		240.827	9.97773		167.801	19.2681		239.432	12.1156		166.918	22.4072		167.873	5.16261
238.123	12.9479		240.1	4.52389		239.841	6.59297		239.187	5.01275		241.076	9.97623		167.966	19.268		239.682	12.1154		167.084	22.4071		168.04	5.16258
238.373	12.9478		240.351	4.52128		240.091	6.59081		239.438	5.00563		241.326	9.97468		168.134	19.2679		239.932	12.1152		167.25	22.4071		168.206	5.16256
238.623	12.9478		240.6	4.51877		240.341	6.58855		239.688	4.99851		241.576	9.97322		168.299	19.2678		240.182	12.1151		167.416	22.407		168.372	5.16254
238.873	12.9475		240.85	4.5161		240.592	6.58626		239.937	4.99132		241.825	9.97176		168.465	19.2677		240.431	12.1149		167.583	22.4069		168.539	5.16252
239.122	12.9466		241.1	4.51333		240.841	6.58404		240.187	4.98396		242.074	9.97023		168.631	19.2676		240.681	12.1148		167.75	22.4068		168.705	5.1625
239.372	12.946		241.35	4.51057		241.091	6.58192		240.437	4.9763		242.324	9.96863		168.797	19.2676		240.93	12.1146		167.916	22.4068		168.872	5.16247
239.622	12.9456		241.6	4.50777		241.339	6.57981		240.687	4.96863		242.575	9.96688		168.963	19.2675		241.18	12.1144		168.082	22.4067		169.039	5.16244
239.871	12.9436		241.85	4.505		241.589	6.57768		240.936	4.96091		242.824	9.96507		169.129	19.2674		241.43	12.1143		168.249	22.4066		169.204	5.1624
240.121	12.9433		242.1	4.50219		241.839	6.57545		241.187	4.95335		243.074	9.96327		169.296	19.2673		241.68	12.1141		168.416	22.4065		169.371	5.16238
240.371	12.9443		242.349	4.49943		242.087	6.5731		241.437	4.94567		243.325	9.96153		169.462	19.2673		241.928	12.1139		168.581	22.4064		169.538	5.16236
240.621	12.9485		242.599	4.49657		242.337	6.57073		241.687	4.93792		243.573	9.9598		169.627	19.2672		242.178	12.1138		168.748	22.4064		169.704	5.16234
240.871	12.9503		242.849	4.49368		242.587	6.56832		241.936	4.93009		243.824	9.95802		169.795	19.2671		242.427	12.1136		168.914	22.4063		169.87	5.16232
241.121	12.9495		243.1	4.49066		242.837	6.56599		242.185	4.92221		244.074	9.95621		169.961	19.267		242.677	12.1135		169.081	22.4062		170.037	5.16229
241.37	12.9478		243.35	4.48758		243.087	6.56374		242.435	4.91406		244.324	9.95427		170.127	19.2669		242.927	12.1133		169.247	22.4061		170.203	5.16227
241.62	12.9461		243.6	4.48458		243.336	6.56151		242.684	4.90583		244.573	9.95229		170.293	19.2669		243.177	12.1131		169.413	22.4061		170.369	5.16224
241.87	12.9452		243.849	4.48164		243.586	6.55921		242.935	4.89747		244.824	9.95033		170.46	19.2668		243.427	12.113		169.579	22.406		170.536	5.16221
242.12	12.944		244.1	4.47875		243.837	6.55687		243.184	4.88948		245.073	9.94837		170.626	19.2667		243.676	12.1128		169.746	22.4059		170.703	5.16218
242.37	12.9436		244.35	4.47582		244.086	6.55454		243.433	4.88115		245.323	9.94646		170.792	19.2666		243.927	12.1126		169.912	22.4058		170.869	5.16216
242.62	12.9435		244.599	4.47277		244.336	6.55211		243.683	4.87283		245.573	9.94449		170.959	19.2665		244.176	12.1125		170.079	22.4058		171.035	5.16214
242.869	12.9433		244.849	4.46973		244.584	6.54962		243.933	4.86444		245.822	9.94243		171.125	19.2664		244.426	12.1123		170.245	22.4057		171.202	5.16211
243.119	12.9431		245.099	4.46652		244.835	6.5472		244.183	4.85576		246.073	9.94028		171.291	19.2664		244.675	12.1121		170.412	22.4056		171.368	5.16209
243.369	12.943		245.348	4.46327		245.084	6.54492		244.433	4.847		246.322	9.93812		171.459	19.2663		244.925	12.1119		170.578	22.4055		171.535	5.16206
243.619	12.9424		245.598	4.46006		245.333	6.54273		244.683	4.83815		246.572	9.93597		171.625	19.2662		245.175	12.1118		170.745	22.4054		171.701	5.16204
243.869	12.942		245.848	4.4568		245.583	6.5406		244.932	4.82933		246.821	9.93387		171.792	19.2661		245.425	12.1116		170.91	22.4053		171.867	5.16201
244.119	12.942		246.098	4.45365		245.833	6.53845		245.182	4.82052		247.07	9.93181		171.958	19.266		245.674	12.1114		171.077	22.4052		172.034	5.16199
244.368	12.9494		246.347	4.45047		246.082	6.53618		245.432	4.81164		247.319	9.92972		172.125	19.266		245.924	12.1113		171.244	22.4052		172.2	5.16196
244.618	12.9578		246.598	4.44723		246.332	6.53385		245.681	4.80273		247.57	9.9275		172.291	19.2659		246.174	12.1111		171.41	22.4051		172.366	5.16194
244.868	12.9563		246.847	4.44392		246.582	6.53142		245.932	4.79365		247.82	9.92523		172.458	19.2658		246.424	12.1109		171.576	22.405		172.533	5.16191
245.117	12.9521		247.097	4.4405		246.832	6.529		246.182	4.78444		248.069	9.92298		172.624	19.2657		246.673	12.1107		171.742	22.4049		172.699	5.16188
245.366	12.9495		247.347	4.43704		247.082	6.52661		246.432	4.77495		248.318	9.92074		172.791	19.2657		246.924	12.1105		171.909	22.4048		172.865	5.16185
245.617	12.9485		247.596	4.43365		247.333	6.52431		246.682	4.76554		248.568	9.91859		172.957	19.2656		247.174	12.1104		172.076	22.4047		173.031	5.16183
245.866	12.9475		247.846	4.43023		247.582	6.52194		246.93	4.75608		248.817	9.91648		173.124	19.2655		247.424	12.1102		172.242	22.4047		173.197	5.1618
246.115	12.9474		248.097	4.42688		247.832	6.51952		247.18	4.74651		249.067	9.91436		173.289	19.2654		247.675	12.11		172.408	22.4046		173.364	5.16178
246.366	12.9656		248.347	4.42339		248.083	6.51694		247.429	4.7371		249.315	9.91228		173.456	19.2653		247.925	12.1098		172.574	22.4045		173.53	5.16176
246.616	13.0091		248.598	4.41992		248.333	6.51422		247.679	4.72737		249.564	9.91008		173.623	19.2652		248.174	12.1097		172.74	22.4044		173.696	5.16174
246.866	13.033		248.848	4.41628		248.584	6.51151		247.93	4.71755		249.814	9.90788		173.789	19.2652		248.424	12.1095		172.908	22.4043		173.863	5.16171
247.115	13.0682		249.097	4.41259		248.835	6.50883		248.18	4.70774		250.063	9.90572		173.956	19.2651		248.674	12.1093		173.073	22.4043		174.029	5.16168
247.365	13.04		249.346	4.40892		249.084	6.50611		248.429	4.69754		250.311	9.90356		174.122	19.265		248.924	12.1091		173.24	22.4042		174.195	5.16165
247.615	13.0374		249.596	4.40527		249.335	6.50337		248.679	4.68742		250.56	9.90151		174.288	19.2649		249.173	12.109		173.406	22.4041		174.361	5.16162
247.865	13.0335		249.847	4.40167		249.585	6.50063		248.929	4.67726		250.809	9.89949		174.455	19.2648		249.424	12.1088		173.573	22.404		174.528	5.16159
248.114	12.9753		250.095	4.39808		249.836	6.49779		249.179	4.66716		251.057	9.89749		174.621	19.2647		249.673	12.1086		173.74	22.4039		174.694	5.16157
248.365	12.9842		250.345	4.39443		250.087	6.49485		249.429	4.65683		251.305	9.89544		174.789	19.2647		249.923	12.1084		173.905	22.4038		174.861	5.16154
248.615	12.9906		250.595	4.39067		250.338	6.4918		249.678	4.64654		251.554	9.8933		174.954	19.2646		250.172	12.1082		174.072	22.4037		175.027	5.16151
248.864	12.9921		250.844	4.38672		250.587	6.48878		249.928	4.63597		251.802	9.89114		175.121	19.2645		250.422	12.108		174.239	22.4037		175.193	5.16149
249.114	13.0077		251.094	4.3828		250.836	6.48575		250.178	4.62531		252.051	9.88909		175.288	19.2644		250.671	12.1078		174.405	22.4036		175.36	5.16146
249.363	12.9853		251.344	4.37881		251.087	6.48279		250.427	4.61448		252.299	9.88709		175.453	19.2643		250.921	12.1077		174.572	22.4035		175.525	5.16143
249.614	12.9522		251.594	4.37485		251.336	6.47972		250.677	4.60365		252.547	9.88513		175.62	19.2642		251.171	12.1075		174.738	22.4034		175.692	5.16141
249.864	12.9369		251.844	4.37092		251.587	6.47671		250.927	4.59272		252.796	9.88311		175.786	19.2641		251.421	12.1073		174.904	22.4033		175.859	5.16138
250.114	12.9383		252.093	4.36703		251.837	6.47367		251.177	4.58186		253.044	9.88109		175.952	19.2641		251.67	12.1071		175.071	22.4032		176.025	5.16136
250.363	12.9354		252.342	4.36308		252.086	6.47044		251.426	4.57091		253.291	9.87907		176.119	19.264		251.921	12.1069		175.238	22.4032		176.192	5.16133
250.613	12.9343		252.594	4.35906		252.336	6.46721		251.677	4.55978		253.541	9.87696		176.285	19.2639		252.171	12.1067		175.404	22.4031		176.359	5.1613
250.864	12.9338		252.843	4.35494		252.586	6.46385		251.926	4.5487		253.789	9.87479		176.451	19.2638		252.42	12.1066		175.57	22.403		176.525	5.16127
251.112	12.9372		253.092	4.35069		252.836	6.46047		252.176	4.53717		254.038	9.87269		176.618	19.2637		252.669	12.1064		175.736	22.4029		176.692	5.16125
251.363	12.9423		253.342	4.34634		253.085	6.45731		252.426	4.52554		254.287	9.87067		176.784	19.2636		252.919	12.1062		175.902	22.4028		176.857	5.16122
251.613	12.9529		253.593	4.34206		253.333	6.45423		252.676	4.51379		254.535	9.86863		176.95	19.2635		253.169	12.106		176.069	22.4027		177.023	5.16119
251.863	12.9987		253.843	4.33787		253.582	6.45114		252.927	4.50204		254.784	9.86661		177.117	19.2634		253.419	12.1058		176.234	22.4026		177.19	5.16117
252.113	13.1076		254.093	4.33366		253.83	6.44801		253.176	4.49053		255.033	9.86456		177.283	19.2633		253.668	12.1056		176.402	22.4025		177.356	5.16114
252.363	13.0798		254.343	4.32941		254.079	6.44482		253.426	4.47875		255.281	9.86241		177.449	19.2633		253.917	12.1054		176.568	22.4024		177.524	5.16112
252.613	13.0337		254.593	4.32503		254.327	6.44167		253.675	4.46698		255.53	9.86025		177.616	19.2632		254.168	12.1052		176.734	22.4023		177.69	5.16109
252.863	12.9866		254.843	4.3205		254.576	6.43859		253.925	4.45469		255.779	9.85813		177.781	19.2631		254.418	12.1051		176.901	22.4022		177.856	5.16106
253.112	12.9519		255.093	4.31597		254.824	6.43553		254.175	4.44261		256.028	9.85608		177.948	19.263		254.668	12.1049		177.067	22.402		178.022	5.16103
253.362	13.067		255.344	4.31137		255.072	6.43254		254.424	4.43028		256.277	9.8541		178.114	19.2629		254.917	12.1047		177.233	22.4018		178.189	5.161
253.611	13.1336		255.594	4.30688		255.32	6.42967		254.674	4.41795		256.525	9.85213		178.281	19.2628		255.167	12.1045		177.399	22.4017		178.356	5.16098
253.862	13.065		255.844	4.30232		255.567	6.42687		254.924	4.40555		256.775	9.85018		178.447	19.2628		255.416	12.1043		177.566	22.4015		178.522	5.16095
254.111	12.9822		256.094	4.29788		255.815	6.42405		255.173	4.39314		257.024	9.84806		178.614	19.2627		255.666	12.1041		177.732	22.4013		178.688	5.16092
254.36	12.9491		256.344	4.29318		256.064	6.42123		255.423	4.38042		257.273	9.84591		178.78	19.2626		255.916	12.1039		177.899	22.4012		178.854	5.16089
254.61	12.934		256.594	4.2884		256.312	6.41833		255.673	4.36777		257.522	9.84376		178.946	19.2625		256.165	12.1037		178.065	22.401		179.022	5.16087
254.86	12.9299		256.844	4.2835		256.559	6.41547		255.922	4.35477		257.771	9.84169		179.114	19.2624		256.415	12.1035		178.232	22.4008		179.188	5.16084
255.11	12.937		257.094	4.27858		256.808	6.41261		256.171	4.3418		258.02	9.83963		179.279	19.2623		256.665	12.1033		178.398	22.4007		179.354	5.16081
255.359	12.9326		257.344	4.27373		257.057	6.40987		256.421	4.32864		258.27	9.8376		179.446	19.2622		256.914	12.1031		178.565	22.4005		179.52	5.16078
255.61	12.9209		257.594	4.26888		257.305	6.40717		256.671	4.31529		258.521	9.8356		179.613	19.2621		257.164	12.1029		178.73	22.4004		179.687	5.16075
255.859	12.9316		257.844	4.26402		257.553	6.40449		256.921	4.30207		258.77	9.8335		179.779	19.2621		257.413	12.1027		178.897	22.4002		179.854	5.16072
256.109	12.9454		258.094	4.25918		257.802	6.40174		257.17	4.28873		259.019	9.83131		179.946	19.262		257.663	12.1025		179.063	22.4001		180.02	5.16069
256.359	12.9431		258.343	4.25415		258.051	6.39896		257.42	4.27526		259.27	9.82902		180.112	19.2619		257.913	12.1023		179.228	22.4		180.186	5.16066
256.608	12.9282		258.593	4.24905		258.3	6.39613		257.67	4.26157		259.52	9.82682		180.279	19.2618		258.162	12.1021		179.395	22.3998		180.352	5.16064
256.858	12.9152		258.843	4.24373		258.549	6.39316		257.919	4.24777		259.771	9.82456		180.445	19.2617		258.412	12.102		179.561	22.3997		180.519	5.1606
257.108	12.9154		259.092	4.23837		258.798	6.39013		258.169	4.23371		260.022	9.82236		180.612	19.2617		258.662	12.1017		179.727	22.3996		180.685	5.16057
257.359	12.9149		259.342	4.23308		259.048	6.38715		258.419	4.21968		260.273	9.82011		180.777	19.2616		258.912	12.1015		179.893	22.3994		180.852	5.16054
257.608	12.9311		259.592	4.22788		259.298	6.38425		258.669	4.20544		260.524	9.81775		180.944	19.2615		259.162	12.1013		180.059	22.3993		181.018	5.16051
257.858	12.9631		259.842	4.22258		259.548	6.38119		258.918	4.19132		260.777	9.81519		181.11	19.2614		259.411	12.1011		180.226	22.3991		181.185	5.16049
258.107	12.9547		260.091	4.21732		259.798	6.37807		259.168	4.17712		261.031	9.8126		181.277	19.2613		259.661	12.1009		180.392	22.399		181.351	5.16046
258.357	12.9401		260.341	4.21194		260.048	6.37482		259.418	4.1627		261.284	9.80991		181.443	19.2612		259.911	12.1007		180.558	22.3989		181.518	5.16044
258.608	12.9337		260.59	4.20629		260.299	6.37148		259.667	4.14818		261.538	9.80716		181.609	19.2611		260.162	12.1005		180.724	22.3988		181.685	5.16041
258.857	13.0256		260.84	4.20064		260.55	6.36797		259.917	4.13327		261.793	9.80436		181.776	19.2611		260.411	12.1003		180.89	22.3987		181.851	5.16037
259.107	13.1268		261.09	4.19489		260.801	6.36439		260.166	4.11859		262.048	9.80136		181.941	19.261		260.661	12.1001		181.057	22.3985		182.017	5.16034
259.357	13.1922		261.339	4.18916		261.053	6.36081		260.416	4.10339		262.303	9.79819		182.108	19.2609		260.91	12.0999		181.223	22.3984		182.184	5.16031
259.607	13.1812		261.59	4.1835		261.305	6.35721		260.666	4.08838		262.558	9.79487		182.275	19.2608		261.16	12.0997		181.39	22.3983		182.35	5.16028
259.857	13.0403		261.839	4.17788		261.557	6.35353		260.915	4.07332		262.813	9.79146		182.441	19.2607		261.41	12.0995		181.556	22.3982		182.517	5.16025
260.106	12.9789		262.089	4.1722		261.81	6.34958		261.165	4.05788		263.068	9.78793		182.607	19.2606		261.66	12.0993		181.723	22.3981		182.684	5.16022
260.355	12.9581		262.339	4.16623		262.061	6.34532		261.415	4.04263		263.322	9.78439		182.774	19.2605		261.909	12.0991		181.89	22.398		182.85	5.16019
260.606	12.985		262.589	4.16006		262.315	6.34073		261.664	4.02686		263.576	9.78088		182.94	19.2604		262.159	12.0989		182.057	22.3978		183.016	5.16016
260.854	13.1126		262.838	4.15407		262.568	6.33594		261.915	4.01107		263.829	9.77729		183.106	19.2603		262.409	12.0987		182.224	22.3977		183.182	5.16013
261.105	13.1349		263.088	4.14797		262.821	6.33117		262.164	3.99508		264.082	9.77363		183.273	19.2602		262.658	12.0985		182.39	22.3976		183.349	5.16009
261.355	13.1587		263.338	4.14181		263.075	6.32627		262.414	3.979		264.334	9.7698		183.439	19.2602		262.908	12.0983		182.557	22.3975		183.515	5.16006
261.604	13.1933		263.588	4.13579		263.329	6.32141		262.664	3.96305		264.586	9.76595		183.605	19.2601		263.159	12.0981		182.723	22.3974		183.683	5.16003
261.854	13.1787		263.838	4.12985		263.583	6.31634		262.914	3.94689		264.837	9.76207		183.772	19.26		263.408	12.0979		182.89	22.3973		183.849	5.16
262.105	13.0664		264.087	4.12357		263.837	6.3111		263.164	3.93063		265.087	9.75826		183.939	19.2599		263.658	12.0977		183.057	22.3972		184.015	5.15998
262.353	12.9759		264.337	4.11716		264.091	6.30569		263.414	3.91408		265.337	9.75439		184.106	19.2598		263.908	12.0975		183.224	22.3971		184.182	5.15995
262.604	12.9368		264.587	4.1106		264.344	6.30016		263.663	3.89755		265.586	9.75058		184.272	19.2597		264.157	12.0973		183.391	22.397		184.348	5.15992
262.853	12.932		264.837	4.10398		264.597	6.29452		263.914	3.88053		265.836	9.74658		184.439	19.2596		264.406	12.097		183.557	22.3968		184.514	5.15988
263.104	12.9286		265.087	4.0973		264.849	6.28902		264.163	3.86346		266.084	9.74259		184.606	19.2595		264.657	12.0968		183.724	22.3967		184.68	5.15985
263.354	12.9189		265.337	4.0909		265.101	6.28346		264.413	3.84644		266.333	9.73849		184.771	19.2595		264.906	12.0966		183.891	22.3966		184.846	5.15982
263.604	12.9218		265.587	4.0845		265.353	6.27788		264.663	3.82937		266.582	9.73433		184.938	19.2594		265.155	12.0964		184.057	22.3965		185.013	5.15979
263.854	12.9297		265.838	4.07803		265.606	6.27225		264.913	3.81214		266.83	9.73018		185.105	19.2593		265.405	12.0962		184.224	22.3964		185.179	5.15977
264.104	12.9296		266.087	4.07137		265.857	6.26648		265.163	3.79469		267.079	9.72607		185.271	19.2592		265.656	12.096		184.39	22.3963		185.346	5.15974
264.354	12.9096		266.337	4.06452		266.108	6.26062		265.413	3.77692		267.327	9.72194		185.438	19.2591		265.905	12.0958		184.556	22.3962		185.512	5.15971
264.604	12.9118		266.587	4.0576		266.359	6.25468		265.662	3.75948		267.576	9.71765		185.605	19.259		266.154	12.0955		184.723	22.3961		185.678	5.15967
264.854	12.9146		266.837	4.05046		266.609	6.24864		265.912	3.74137		267.825	9.71328		185.77	19.2589		266.403	12.0953		184.889	22.3959		185.845	5.15964
265.104	12.9177		267.087	4.04355		266.859	6.24247		266.162	3.72333		268.074	9.70872		185.938	19.2588		266.652	12.0951		185.056	22.3958		186.012	5.15961
265.354	12.9181		267.337	4.03659		267.109	6.23646		266.411	3.70531		268.323	9.70409		186.103	19.2587		266.903	12.0949		185.222	22.3957		186.179	5.15958
265.604	12.9153		267.587	4.02962		267.359	6.23043		266.661	3.68707		268.572	9.69962		186.27	19.2586		267.153	12.0947		185.389	22.3956		186.345	5.15955
265.853	12.9189		267.836	4.02256		267.608	6.2244		266.911	3.66883		268.82	9.69524		186.437	19.2585		267.403	12.0945		185.555	22.3955		186.512	5.15952
266.103	12.9779		268.086	4.0153		267.857	6.21823		267.16	3.6505		269.07	9.6908		186.603	19.2585		267.653	12.0943		185.722	22.3954		186.678	5.15949
266.354	13.0544		268.337	4.00799		268.107	6.21186		267.411	3.63176		269.317	9.68619		186.769	19.2584		267.902	12.094		185.888	22.3953		186.844	5.15946
266.604	13.0567		268.586	4.00047		268.355	6.20537		267.66	3.6128		269.566	9.68146		186.935	19.2583		268.153	12.0938		186.054	22.3952		187.011	5.15943
266.853	13.0125		268.836	3.99307		268.604	6.1988		267.909	3.59364		269.814	9.67664		187.102	19.2582		268.402	12.0936		186.221	22.3951		187.177	5.1594
267.103	12.9671		269.086	3.98576		268.852	6.19241		268.159	3.57461		270.065	9.67175		187.268	19.2581		268.653	12.0934		186.388	22.395		187.345	5.15936
267.353	12.9482		269.335	3.97831		269.102	6.18583		268.409	3.55552		270.313	9.66687		187.434	19.258		268.901	12.0932		186.554	22.3949		187.511	5.15934
267.603	12.9426		269.585	3.97091		269.35	6.17918		268.659	3.53593		270.562	9.66202		187.601	19.2579		269.152	12.0929		186.721	22.3948		187.677	5.15931
267.853	12.9406		269.835	3.96332		269.598	6.17272		268.908	3.51658		270.81	9.65709		187.767	19.2578		269.401	12.0927		186.887	22.3947		187.843	5.15929
268.104	12.9444		270.084	3.95549		269.847	6.16591		269.157	3.49704		271.059	9.65218		187.933	19.2577		269.651	12.0925		187.053	22.3946		188.01	5.15926
268.353	12.9469		270.334	3.94753		270.095	6.15917		269.407	3.47709		271.308	9.64719		188.099	19.2577		269.9	12.0923		187.219	22.3946		188.175	5.15922
268.603	12.9596		270.584	3.93958		270.344	6.15227		269.657	3.45708		271.557	9.64208		188.266	19.2576		270.15	12.092		187.386	22.3945		188.342	5.15919
268.853	12.9465		270.834	3.93157		270.592	6.14521		269.906	3.43688		271.805	9.63684		188.432	19.2575		270.4	12.0918		187.553	22.3943		188.507	5.15915
269.103	12.921		271.083	3.92363		270.841	6.13809		270.155	3.41653		272.054	9.63155		188.598	19.2574		270.649	12.0916		187.719	22.3943		188.674	5.15912
269.353	12.9243		271.333	3.91581		271.089	6.13109		270.405	3.39616		272.303	9.62628		188.765	19.2573		270.899	12.0914		187.885	22.3942		188.84	5.1591
269.602	12.9282		271.583	3.90779		271.338	6.12424		270.655	3.37563		272.551	9.62112		188.931	19.2572		271.149	12.0911		188.052	22.3941		189.006	5.15907
269.851	12.934		271.832	3.89981		271.587	6.11711		270.904	3.35526		272.8	9.61596		189.097	19.2571		271.398	12.0909		188.218	22.394		189.173	5.15903
270.101	12.9383		272.082	3.8914		271.835	6.11001		271.154	3.33441		273.048	9.61065		189.264	19.257		271.649	12.0907		188.384	22.3939		189.339	5.159
270.35	12.9394		272.333	3.8829		272.084	6.10269		271.403	3.31328		273.298	9.60501		189.43	19.2569		271.898	12.0904		188.551	22.3938		189.505	5.15897
270.6	12.9402		272.581	3.87437		272.332	6.09518		271.654	3.29197		273.547	9.59943		189.596	19.2568		272.147	12.0902		188.717	22.3937		189.672	5.15893
270.849	12.9314		272.831	3.86586		272.582	6.08763		271.903	3.27053		273.796	9.59375		189.763	19.2567		272.397	12.09		188.883	22.3936		189.838	5.15889
271.099	12.9229		273.081	3.85729		272.831	6.08007		272.152	3.24866		274.045	9.58811		189.93	19.2566		272.647	12.0898		189.05	22.3935		190.003	5.15886
271.347	12.9186		273.331	3.8487		273.08	6.07269		272.403	3.22716		274.295	9.58258		190.096	19.2565		272.898	12.0895		189.216	22.3934		190.17	5.15883
271.596	12.917		273.581	3.8402		273.33	6.06521		272.653	3.20558		274.545	9.57702		190.262	19.2564		273.147	12.0893		189.382	22.3933		190.337	5.15881
271.845	12.9171		273.832	3.83142		273.578	6.05766		272.902	3.18353		274.795	9.57136		190.428	19.2563		273.396	12.0891		189.548	22.3932		190.503	5.15877
272.095	12.9174		274.082	3.82272		273.828	6.04997		273.152	3.1614		275.046	9.5655		190.596	19.2563		273.646	12.0888		189.715	22.3931		190.67	5.15874
272.344	12.9174		274.332	3.81356		274.077	6.04204		273.401	3.13923		275.296	9.55932		190.762	19.2562		273.897	12.0886		189.881	22.393		190.836	5.15871
272.593	12.9163		274.582	3.80457		274.327	6.03411		273.651	3.11657		275.545	9.55325		190.927	19.2561		274.146	12.0883		190.047	22.393		191.003	5.15868
272.844	12.915		274.832	3.79565		274.576	6.02608		273.901	3.09367		275.795	9.5473		191.094	19.256		274.396	12.0881		190.214	22.3929		191.168	5.15865
273.094	12.911		275.083	3.78645		274.826	6.01799		274.151	3.0709		276.044	9.54138		191.259	19.2559		274.646	12.0879		190.379	22.3928		191.335	5.15861
273.344	12.9085		275.333	3.77729		275.076	6.00999		274.401	3.04803		276.291	9.53542		191.426	19.2558		274.895	12.0876		190.546	22.3928		191.502	5.15858
273.595	12.9104		275.583	3.7682		275.325	6.00202		274.65	3.02478		276.541	9.52926		191.593	19.2557		275.145	12.0874		190.712	22.3927		191.669	5.15855
273.846	12.9099		275.834	3.75862		275.575	5.99394		274.9	3.00187		276.79	9.523		191.759	19.2556		275.394	12.0872		190.878	22.3926		191.836	5.15851
274.096	12.9089		276.083	3.74906		275.826	5.98562		275.15	2.97856		277.039	9.51662		191.925	19.2555		275.644	12.0869		191.044	22.3926		192.003	5.15847
274.347	12.9081		276.334	3.73942		276.075	5.97726		275.399	2.95461		277.288	9.51009		192.092	19.2554		275.894	12.0867		191.212	22.3925		192.169	5.15843
274.598	12.9066		276.584	3.72984		276.324	5.96882		275.649	2.9308		277.537	9.50368		192.257	19.2553		276.144	12.0865		191.379	22.3925		192.336	5.15839
274.849	12.9039		276.834	3.7201		276.575	5.96019		275.899	2.907		277.788	9.49738		192.423	19.2552		276.394	12.0862		191.544	22.3924		192.502	5.15836
275.099	12.9026		277.085	3.71045		276.825	5.95178		276.149	2.88292		278.037	9.49096		192.591	19.2552		276.643	12.086		191.711	22.3924		192.669	5.15834
275.349	12.8985		277.335	3.70077		277.075	5.94315		276.399	2.85877		278.286	9.48442		192.756	19.2551		276.893	12.0857		191.877	22.3923		192.835	5.1583
275.6	12.8945		277.585	3.69087		277.325	5.93458		276.647	2.83456		278.536	9.4779		192.923	19.255		277.142	12.0855		192.044	22.3922		193.002	5.15827
275.851	12.8993		277.835	3.68084		277.575	5.92595		276.897	2.81016		278.785	9.47108		193.088	19.2549		277.392	12.0852		192.21	22.3922		193.169	5.15823
276.102	12.9002		278.085	3.67052		277.825	5.91716		277.147	2.78581		279.036	9.46425		193.254	19.2548		277.642	12.085		192.377	22.3921		193.334	5.15819
276.352	12.9023		278.335	3.66031		278.076	5.90812		277.397	2.76084		279.286	9.45728		193.42	19.2547		277.891	12.0848		192.543	22.3921		193.501	5.15816
276.604	12.9048		278.584	3.65		278.326	5.89922		277.647	2.73584		279.536	9.45036		193.587	19.2546		278.141	12.0845		192.71	22.392		193.667	5.15812
276.854	12.9056		278.834	3.63954		278.576	5.88995		277.897	2.7104		279.786	9.44353		193.754	19.2545		278.391	12.0843		192.876	22.3919		193.834	5.15808
277.104	12.9062		279.084	3.62914		278.826	5.88098		278.146	2.68511		280.036	9.43666		193.92	19.2544		278.641	12.084		193.043	22.3919		194.001	5.15805
277.355	12.9077		279.333	3.61878		279.077	5.8718		278.396	2.65975		280.286	9.42975		194.087	19.2543		278.89	12.0838		193.209	22.3918		194.167	5.15802
277.605	12.9096		279.583	3.60825		279.328	5.86282		278.645	2.6339		280.536	9.42236		194.255	19.2542		279.14	12.0835		193.375	22.3918		194.333	5.15798
277.855	12.9104		279.832	3.59731		279.578	5.85361		278.896	2.60804		280.785	9.41508		194.421	19.2541		279.389	12.0833		193.542	22.3917		194.5	5.15794
278.106	12.9183		280.083	3.58656		279.829	5.84427		279.146	2.58229		281.035	9.40788		194.587	19.2541		279.639	12.083		193.708	22.3916		194.667	5.1579
278.356	12.9284		280.332	3.5755		280.078	5.83464		279.395	2.55615		281.285	9.40042		194.755	19.254		279.889	12.0828		193.874	22.3916		194.833	5.15786
278.606	12.9244		280.582	3.56469		280.329	5.82512		279.646	2.52973		281.534	9.3931		194.921	19.2539		280.139	12.0825		194.041	22.3915		194.999	5.15782
278.856	12.9178		280.832	3.55375		280.58	5.81536		279.894	2.50298		281.784	9.3857		195.088	19.2538		280.388	12.0823		194.206	22.3914		195.166	5.15779
279.106	12.9129		281.082	3.54267		280.83	5.8057		280.144	2.4764		282.033	9.37818		195.254	19.2537		280.638	12.082		194.373	22.3914		195.333	5.15775
279.356	12.9116		281.332	3.53156		281.079	5.7962		280.394	2.44965		282.283	9.37071		195.421	19.2536		280.887	12.0818		194.54	22.3913		195.499	5.15772
279.606	12.9108		281.581	3.52032		281.33	5.78643		280.644	2.42243		282.531	9.36285		195.588	19.2535		281.136	12.0815		194.706	22.3912		195.666	5.15768
279.856	12.9102		281.831	3.50886		281.58	5.77659		280.893	2.39527		282.781	9.35518		195.754	19.2534		281.386	12.0813		194.873	22.3912		195.832	5.15764
280.106	12.9099		282.082	3.49713		281.83	5.76673		281.142	2.36798		283.03	9.34735		195.92	19.2533		281.636	12.081		195.039	22.3911		195.999	5.1576
280.355	12.9087		282.332	3.48561		282.08	5.75655		281.392	2.34038		283.28	9.33934		196.087	19.2532		281.886	12.0808		195.205	22.3911		196.165	5.15756
280.605	12.9065		282.582	3.47414		282.33	5.74635		281.642	2.3127		283.529	9.33151		196.252	19.2531		282.136	12.0805		195.371	22.391		196.33	5.15752
280.856	12.9063		282.832	3.46258		282.579	5.73597		281.892	2.28472		283.778	9.3234		196.419	19.253		282.386	12.0803		195.538	22.3909		196.497	5.15749
281.104	12.9059		283.082	3.45096		282.829	5.72568		282.141	2.25656		284.027	9.31529		196.586	19.2529		282.635	12.08		195.705	22.3908		196.663	5.15746
281.354	12.9043		283.332	3.43924		283.079	5.71556		282.392	2.22835		284.275	9.30709		196.752	19.2528		282.885	12.0798		195.87	22.3908		196.829	5.15743
281.604	12.9046		283.582	3.42718		283.329	5.70517		282.641	2.20024		284.524	9.29861		196.917	19.2527		283.135	12.0795		196.038	22.3907		196.995	5.15739
281.854	12.9046		283.831	3.4151		283.578	5.69475		282.891	2.17166		284.773	9.29024		197.086	19.2526		283.385	12.0792		196.204	22.3907		197.161	5.15735
282.105	12.9046		284.081	3.40274		283.828	5.68398		283.14	2.14312		285.022	9.28199		197.252	19.2525		283.635	12.079		196.37	22.3906		197.327	5.15731
282.354	12.9044		284.331	3.39054		284.078	5.67321		283.39	2.11412		285.269	9.27355		197.418	19.2524		283.885	12.0787		196.537	22.3905		197.493	5.15727
282.604	12.9044		284.581	3.37818		284.327	5.66229		283.64	2.08522		285.518	9.26503		197.584	19.2523		284.135	12.0785		196.704	22.3905		197.658	5.15723
282.854	12.9033		284.832	3.36598		284.577	5.65151		283.89	2.05595		285.767	9.2566		197.751	19.2522		284.384	12.0782		196.87	22.3904		197.825	5.15719
283.103	12.9025		285.082	3.35366		284.827	5.64053		284.14	2.02655		286.015	9.2478		197.917	19.2521		284.634	12.0779		197.037	22.3903		197.992	5.15716
283.353	12.9023		285.332	3.34104		285.077	5.6296		284.389	1.99711		286.263	9.23894		198.083	19.252		284.883	12.0777		197.203	22.3902		198.158	5.15713
283.604	12.9018		285.582	3.3285		285.326	5.61872		284.639	1.96758		286.51	9.23001		198.251	19.252		285.133	12.0774		197.37	22.3901		198.325	5.1571
283.854	12.9017		285.832	3.31554		285.577	5.60746		284.888	1.93805		286.758	9.22112		198.417	19.2519		285.383	12.0771		197.536	22.39		198.491	5.15706
284.104	12.9017		286.081	3.30264		285.827	5.59621		285.138	1.90827		287.004	9.21217		198.583	19.2518		285.632	12.0769		197.703	22.3899		198.657	5.15702
284.354	12.901		286.331	3.28958		286.077	5.58493		285.387	1.87811		287.249	9.20306		198.75	19.2517		285.882	12.0766		197.87	22.3899		198.823	5.15698
284.603	12.8997		286.582	3.27673		286.329	5.57331		285.637	1.84786		287.496	9.19388		198.916	19.2516		286.131	12.0763		198.036	22.3898		198.99	5.15695
284.854	12.8988		286.831	3.26361		286.578	5.56178		285.887	1.81726		287.744	9.18456		199.084	19.2515		286.38	12.0761		198.202	22.3897		199.156	5.15692
285.104	12.8971		287.081	3.25057		286.829	5.55033		286.137	1.7867		287.993	9.17502		199.249	19.2514		286.631	12.0758		198.369	22.3896		199.323	5.15688
285.354	12.8948		287.331	3.23726		287.08	5.53868		286.386	1.75583		288.244	9.16562		199.416	19.2513		286.881	12.0755		198.535	22.3895		199.49	5.15685
285.605	12.894		287.581	3.22372		287.33	5.52713		286.636	1.72476		288.496	9.15622		199.583	19.2512		287.13	12.0753		198.702	22.3894		199.657	5.15681
285.856	12.8933		287.831	3.21		287.58	5.5153		286.885	1.69357		288.751	9.14668		199.749	19.2511		287.379	12.075		198.868	22.3894		199.823	5.15676
286.106	12.8924		288.081	3.19624		287.83	5.50347		287.134	1.66204		289.009	9.13694		199.914	19.251		287.628	12.0747		199.034	22.3893		199.989	5.15672
286.356	12.8917		288.331	3.18261		288.081	5.49135		287.385	1.63036		289.266	9.12719		200.082	19.2509		287.878	12.0744		199.201	22.3892		200.156	5.15668
286.607	12.8914		288.58	3.16887		288.33	5.47917		287.634	1.5983		289.524	9.11714		200.248	19.2508		288.127	12.0742		199.368	22.3891		200.321	5.15665
286.859	12.891		288.831	3.15521		288.581	5.4669		287.884	1.56602		289.78	9.10704		200.414	19.2507		288.377	12.0739		199.535	22.389		200.488	5.15662
287.11	12.8906		289.081	3.1412		288.831	5.45464		288.134	1.53367		290.037	9.09697		200.581	19.2506		288.627	12.0736		199.7	22.389		200.655	5.15658
287.36	12.8899		289.33	3.12708		289.081	5.44233		288.384	1.5012		290.291	9.08673		200.746	19.2505		288.877	12.0733		199.867	22.3889		200.822	5.15654
287.611	12.8886		289.58	3.11272		289.33	5.43007		288.633	1.46827		290.545	9.07656		200.913	19.2504		289.127	12.0731		200.033	22.3888		200.988	5.15651
287.862	12.8865		289.83	3.09849		289.58	5.4175		288.883	1.43546		290.797	9.06634		201.08	19.2503		289.378	12.0728		200.2	22.3887		201.154	5.15646
288.113	12.8848		290.081	3.08394		289.83	5.40479		289.133	1.40214		291.047	9.05588		201.247	19.2502		289.629	12.0725		200.366	22.3886		201.321	5.15642
288.363	12.8834		290.33	3.06957		290.08	5.39194		289.382	1.36856		291.296	9.04534		201.412	19.2501		289.877	12.0722		200.532	22.3885		201.486	5.15639
288.615	12.8821		290.58	3.055		290.33	5.37909		289.632	1.33464		291.544	9.03484		201.578	19.25		290.127	12.0719		200.699	22.3884		201.653	5.15635
288.864	12.8809		290.83	3.0404		290.58	5.36617		289.883	1.30065		291.791	9.02401		201.744	19.2499		290.377	12.0717		200.864	22.3883		201.819	5.15631
289.115	12.8788		291.08	3.02577		290.83	5.3533		290.132	1.26652		292.038	9.01322		201.911	19.2498		290.627	12.0714		201.03	22.3882		201.986	5.15627
289.365	12.8744		291.33	3.01071		291.079	5.34023		290.382	1.23202		292.285	9.00253		202.077	19.2497		290.877	12.0711		201.198	22.3881		202.152	5.15623
289.616	12.8695		291.58	2.9957		291.328	5.32706		290.632	1.19751		292.532	8.99157		202.243	19.2496		291.127	12.0708		201.363	22.388		202.318	5.15619
289.866	12.8645		291.83	2.98047		291.579	5.31388		290.882	1.16279		292.779	8.98058		202.409	19.2495		291.376	12.0706		201.529	22.3879		202.485	5.15615
290.115	12.8588		292.079	2.96523		291.829	5.30058		291.131	1.12769		293.027	8.96946		202.576	19.2494		291.626	12.0703		201.696	22.3878		202.652	5.15611
290.365	12.8551		292.329	2.95003		292.079	5.28685		291.38	1.09234		293.275	8.95828		202.742	19.2493		291.875	12.07		201.862	22.3877		202.819	5.15607
290.615	12.8536		292.579	2.93479		292.329	5.27333		291.63	1.05674		293.524	8.9469		202.908	19.2492		292.125	12.0697		202.028	22.3876		202.985	5.15603
290.864	12.8525		292.827	2.91935		292.579	5.25971		291.88	1.02096		293.774	8.93552		203.075	19.2491		292.374	12.0694		202.194	22.3875		203.152	5.15599
291.114	12.8512		293.078	2.90384		292.828	5.24603		292.13	0.985101		294.024	8.92402		203.241	19.249		292.624	12.0691		202.36	22.3874		203.318	5.15595
291.363	12.8495		293.327	2.88779		293.078	5.23238		292.379	0.948984		294.274	8.91266		203.408	19.2489		292.874	12.0688		202.527	22.3873		203.485	5.15591
291.613	12.8465		293.578	2.87201		293.328	5.21858		292.629	0.912631		294.524	8.90107		203.573	19.2488		293.123	12.0685		202.692	22.3872		203.651	5.15587
291.863	12.8429		293.827	2.85605		293.577	5.20429		292.879	0.876213		294.774	8.88927		203.74	19.2487		293.373	12.0682		202.858	22.3871		203.817	5.15583
292.112	12.8396		294.077	2.83995		293.826	5.19022		293.128	0.83941		295.025	8.8773		203.907	19.2486		293.623	12.0679		203.025	22.3869		203.984	5.15579
292.362	12.8363		294.327	2.82379		294.077	5.17581		293.378	0.802398		295.275	8.86515		204.074	19.2485		293.872	12.0676		203.191	22.3868		204.15	5.15575
292.611	12.8329		294.577	2.80777		294.326	5.16137		293.628	0.76517		295.526	8.85298		204.24	19.2484		294.123	12.0673		203.357	22.3867		204.316	5.15571
292.861	12.831		294.827	2.79141		294.575	5.14693		293.878	0.727873		295.775	8.84091		204.407	19.2483		294.372	12.0671		203.524	22.3866		204.483	5.15567
293.11	12.8289		295.078	2.77505		294.825	5.13234		294.127	0.690522		296.024	8.82869		204.574	19.2482		294.622	12.0668		203.69	22.3865		204.65	5.15562
293.36	12.8263		295.327	2.75833		295.075	5.11778		294.376	0.653173		296.275	8.81652		204.74	19.2481		294.873	12.0664		203.857	22.3864		204.815	5.15558
293.609	12.8233		295.577	2.74171		295.325	5.10327		294.626	0.615722		296.524	8.80412		204.907	19.2479		295.122	12.0662		204.023	22.3863		204.982	5.15554
293.858	12.8195		295.827	2.72474		295.575	5.08829		294.875	0.57835		296.774	8.79136		205.074	19.2478		295.372	12.0658		204.189	22.3862		205.148	5.15549
294.108	12.8142		296.077	2.708		295.824	5.07328		295.124	0.541185		297.023	8.7787		205.24	19.2477		295.622	12.0656		204.357	22.3861		205.316	5.15545
294.357	12.8097		296.328	2.69105		296.074	5.05821		295.374	0.504721		297.272	8.76584		205.407	19.2476		295.871	12.0653		204.524	22.386		205.482	5.15541
294.607	12.8058		296.577	2.67407		296.324	5.04305		295.622	0.468594		297.521	8.75281		205.573	19.2475		296.121	12.065		204.691	22.3858		205.649	5.15537
294.856	12.8018		296.828	2.65677		296.574	5.02769		295.872	0.432818		297.771	8.73991		205.74	19.2474		296.372	12.0647		204.857	22.3857		205.815	5.15533
295.106	12.7969		297.077	2.63937		296.823	5.01238		296.12	0.397508		298.019	8.72676		205.906	19.2473		296.621	12.0644		205.024	22.3856		205.982	5.15528
295.355	12.7927		297.327	2.62187		297.073	4.99704		296.369	0.362305		298.269	8.71368		206.073	19.2472		296.871	12.064		205.19	22.3854		206.149	5.15523
295.604	12.7895		297.577	2.60426		297.323	4.98163		296.617	0.327509		298.519	8.70017		206.239	19.2471		297.121	12.0637		205.357	22.3852		206.315	5.15519
295.854	12.7858		297.827	2.58663		297.573	4.9659		296.865	0.2927		298.767	8.68669		206.405	19.247		297.372	12.0634		205.524	22.3851		206.482	5.15514
296.103	12.782		298.077	2.56905		297.824	4.9499		297.113	0.25844		299.017	8.67302		206.572	19.2469		297.621	12.0631		205.69	22.3849		206.649	5.1551
296.353	12.7775		298.326	2.55137		298.073	4.93398		297.362	0.225071		299.266	8.65936		206.738	19.2468		297.871	12.0628		205.857	22.3847		206.816	5.15507
296.602	12.7725		298.576	2.53352		298.324	4.91787		297.611	0.193209		299.515	8.64558		206.904	19.2467		298.12	12.0625		206.023	22.3845		206.982	5.15503
296.851	12.7682		298.826	2.51532		298.573	4.90173		297.859	0.162595		299.765	8.63187		207.07	19.2466		298.37	12.0622		206.19	22.3843		207.148	5.15499
297.1	12.7642		299.076	2.49713		298.822	4.88564		298.107	0.132929		300.013	8.61799		207.237	19.2465		298.62	12.0619		206.356	22.3841		207.315	5.15494
297.35	12.7591		299.327	2.47875		299.072	4.86953		298.354	0.104386		300.264	8.60374		207.403	19.2464		298.87	12.0616		206.523	22.3839		207.482	5.15489
297.6	12.7549		299.576	2.46041		299.322	4.85322		298.602	0.0770761		300.512	8.58943		207.57	19.2463		299.119	12.0613		206.688	22.3837		207.648	5.15485
297.849	12.7524		299.826	2.44192		299.572	4.83652		298.85	0.051886		300.762	8.57495		207.737	19.2462		299.369	12.061		206.855	22.3835		207.814	5.1548
298.099	12.7491		300.077	2.42358		299.822	4.81985		299.098	0.0291398		301.011	8.56029		207.903	19.2461		299.618	12.0607		207.021	22.3833		207.981	5.15476
298.348	12.7452		300.327	2.40499		300.071	4.8028		299.344	0.0108516		301.261	8.54563		208.07	19.246		299.868	12.0604		207.188	22.3832		208.148	5.15472
298.598	12.7411		300.576	2.38611		300.321	4.78599		299.591	-0.0012464		301.51	8.53079		208.236	19.2459		300.117	12.06		207.355	22.383		208.313	5.15468
298.848	12.7354		300.827	2.36706		300.57	4.76896		299.835	-0.0069241		301.76	8.5161		208.402	19.2458		300.367	12.0597		207.521	22.3828		208.48	5.15463
299.097	12.7293		301.076	2.34788		300.82	4.75192		300.08	-0.0085622		302.009	8.50109		208.569	19.2457		300.617	12.0594		207.687	22.3826		208.646	5.15458
299.347	12.7246		301.326	2.32884		301.07	4.73474		300.322	-0.0087784		302.259	8.48607		208.736	19.2455		300.866	12.0591		207.853	22.3824		208.812	5.15454
299.596	12.7203		301.575	2.3097		301.32	4.71751		300.564	-0.0089897		302.509	8.47075		208.901	19.2454		301.116	12.0588		208.02	22.3823		208.978	5.15449
299.847	12.7158		301.825	2.29037		301.57	4.69999		300.806	-0.0090296		302.758	8.45535		209.068	19.2453		301.365	12.0585		208.188	22.3821		209.145	5.15445
300.097	12.711		302.076	2.27115		301.819	4.68239		301.047	-0.0091746		303.008	8.43982		209.234	19.2452		301.615	12.0582		208.354	22.3819		209.31	5.1544
300.347	12.7056		302.325	2.25173		302.069	4.66448		301.29	-0.0092412		303.258	8.42429		209.401	19.2451		301.864	12.0579		208.52	22.3818		209.477	5.15436
300.597	12.6999		302.575	2.23202		302.318	4.64677		301.533	-0.0093121		303.507	8.40854		209.568	19.245		302.114	12.0575		208.687	22.3816		209.643	5.15432
300.846	12.6944		302.824	2.21224		302.568	4.62891		301.778	-0.0094028		303.757	8.39266		209.733	19.2449		302.364	12.0572		208.853	22.3814		209.81	5.15427
301.096	12.6887		303.074	2.19213		302.819	4.61089		302.025	-0.0094426		304.007	8.37671		209.901	19.2448		302.613	12.0569		209.019	22.3813		209.976	5.15423
301.346	12.6817		303.324	2.17229		303.069	4.59289		302.273	-0.0094606		304.257	8.36063		210.067	19.2447		302.863	12.0566		209.186	22.3811		210.143	5.15417
301.595	12.6767		303.575	2.1524		303.318	4.57464		302.523	-0.0094214		304.507	8.3443		210.234	19.2446		303.112	12.0563		209.353	22.381		210.308	5.15413
301.845	12.6726		303.824	2.13235		303.569	4.5561		302.774	-0.0093813		304.756	8.32787		210.399	19.2445		303.362	12.0559		209.519	22.3808		210.474	5.15409
302.095	12.6684		304.074	2.1122		303.819	4.53768		303.027	-0.0093956		305.007	8.31129		210.566	19.2444		303.611	12.0556		209.686	22.3807		210.641	5.15404
302.344	12.6631		304.325	2.09171		304.069	4.51901		303.28	-0.0094389		305.256	8.29476		210.732	19.2443		303.86	12.0553		209.852	22.3805		210.808	5.154
302.594	12.6578		304.575	2.07129		304.32	4.50009		303.535	-0.0094805		305.506	8.27815		210.899	19.2442		304.11	12.0549		210.018	22.3804		210.973	5.15396
302.844	12.6531		304.824	2.0507		304.57	4.4813		303.791	-0.0095517		305.755	8.26126		211.065	19.244		304.36	12.0546		210.185	22.3802		211.14	5.15391
303.093	12.6479		305.075	2.03017		304.821	4.46236		304.046	-0.0096086		306.005	8.2441		211.232	19.2439		304.609	12.0543		210.351	22.3801		211.307	5.15386
303.343	12.6425		305.323	2.00947		305.071	4.44334		304.302	-0.0096711		306.254	8.22682		211.398	19.2438		304.86	12.054		210.518	22.3799		211.473	5.15382
303.593	12.637		305.574	1.98885		305.322	4.42419		304.557	-0.0097016		306.505	8.20944		211.564	19.2437		305.11	12.0536		210.684	22.3798		211.639	5.15377
303.843	12.6308		305.825	1.96804		305.572	4.40478		304.812	-0.0097352		306.754	8.19196		211.731	19.2436		305.359	12.0533		210.85	22.3796		211.806	5.15373
304.092	12.6251		306.074	1.94714		305.822	4.38534		305.067	-0.0097621		307.004	8.17442		211.897	19.2435		305.609	12.0529		211.016	22.3795		211.972	5.15369
304.343	12.6198		306.324	1.92598		306.074	4.3656		305.32	-0.0097915		307.253	8.15681		212.063	19.2434		305.858	12.0526		211.183	22.3793		212.139	5.15365
304.592	12.6139		306.575	1.90469		306.324	4.346		305.572	-0.0098232		307.504	8.13892		212.23	19.2433		306.109	12.0523		211.349	22.3792		212.305	5.1536
304.842	12.6079		306.825	1.88335		306.574	4.32617		305.825	-0.0098525		307.754	8.12091		212.396	19.2432		306.359	12.0519		211.516	22.379		212.472	5.15356
305.092	12.6018		307.074	1.86219		306.826	4.30631		306.078	-0.0098838		308.003	8.10272		212.562	19.2431		306.608	12.0516		211.683	22.3789		212.638	5.15351
305.342	12.5947		307.324	1.84088		307.076	4.28628		306.33	-0.0099126		308.253	8.08436		212.727	19.2429		306.858	12.0513		211.848	22.3787		212.805	5.15347
305.592	12.5883		307.575	1.81963		307.326	4.26628		306.582	-0.0099314		308.503	8.06581		212.894	19.2428		307.108	12.0509		212.015	22.3786		212.971	5.15342
305.842	12.5827		307.825	1.79813		307.577	4.24576		306.834	-0.0099471		308.753	8.04726		213.06	19.2427		307.357	12.0506		212.181	22.3785		213.138	5.15338
306.091	12.5761		308.075	1.77663		307.827	4.22534		307.086	-0.0099669		309.003	8.02862		213.227	19.2426		307.607	12.0502		212.347	22.3783		213.305	5.15334
306.342	12.5683		308.325	1.75493		308.077	4.20478		307.339	-0.0099942		309.252	8.00978		213.392	19.2425		307.858	12.0499		212.513	22.3782		213.471	5.1533
306.591	12.5628		308.575	1.73322		308.328	4.18425		307.59	-0.0100229		309.504	7.99056		213.56	19.2424		308.106	12.0495		212.679	22.3781		213.637	5.15325
306.841	12.5575		308.825	1.71141		308.578	4.16345		307.843	-0.010057		309.753	7.97136		213.725	19.2423		308.355	12.0492		212.846	22.3779		213.804	5.1532
307.091	12.5517		309.075	1.68965		308.829	4.14284		308.094	-0.0100926		310.002	7.95187		213.892	19.2422		308.605	12.0488		213.012	22.3778		213.97	5.15315
307.34	12.5451		309.325	1.66794		309.079	4.12166		308.347	-0.0101264		310.251	7.9325		214.058	19.242		308.855	12.0485		213.179	22.3776		214.137	5.1531
307.59	12.5382		309.575	1.64626		309.329	4.10049		308.599	-0.0101547		310.502	7.91286		214.225	19.2419		309.105	12.0482		213.345	22.3775		214.303	5.15305
307.84	12.5317		309.825	1.62436		309.578	4.0791		308.851	-0.0101811		310.751	7.89314		214.391	19.2418		309.355	12.0478		213.512	22.3774		214.47	5.15301
308.09	12.5258		310.074	1.60226		309.828	4.0577		309.103	-0.0102078		311.002	7.87334		214.558	19.2417		309.604	12.0475		213.678	22.3773		214.637	5.15297
308.34	12.5195		310.324	1.58017		310.079	4.03609		309.355	-0.0102402		311.251	7.85315		214.724	19.2416		309.854	12.0471		213.845	22.3771		214.803	5.15292
308.59	12.5122		310.574	1.55814		310.328	4.01457		309.607	-0.0102699		311.501	7.83283		214.89	19.2415		310.104	12.0468		214.012	22.377		214.969	5.15287
308.84	12.5056		310.823	1.53613		310.578	3.99272		309.858	-0.0102996		311.751	7.81226		215.057	19.2414		310.354	12.0464		214.178	22.3769		215.135	5.15282
309.09	12.4994		311.074	1.51425		310.828	3.97123		310.11	-0.0103251		312	7.79163		215.222	19.2413		310.603	12.046		214.344	22.3767		215.302	5.15277
309.34	12.4929		311.323	1.49242		311.078	3.94915		310.361	-0.010347		312.25	7.77085		215.389	19.2412		310.853	12.0457		214.511	22.3766		215.468	5.15272
309.591	12.4862		311.573	1.47045		311.328	3.92701		310.612	-0.0103658		312.499	7.75022		215.555	19.2411		311.104	12.0453		214.678	22.3765		215.634	5.15268
309.84	12.4794		311.821	1.44846		311.577	3.90467		310.863	-0.0103849		312.748	7.72925		215.723	19.2409		311.353	12.045		214.844	22.3764		215.801	5.15264
310.091	12.4717		312.072	1.42648		311.828	3.88225		311.113	-0.0104069		312.999	7.70822		215.888	19.2408		311.603	12.0446		215.009	22.3762		215.968	5.15259
310.341	12.464		312.322	1.40454		312.077	3.85967		311.364	-0.0104304		313.249	7.68689		216.055	19.2407		311.853	12.0442		215.176	22.3761		216.134	5.15255
310.591	12.4572		312.571	1.38265		312.327	3.83709		311.613	-0.0104541		313.498	7.66544		216.221	19.2406		312.102	12.0439		215.342	22.376		216.3	5.1525
310.842	12.4506		312.821	1.3609		312.576	3.8143		311.863	-0.0104779		313.748	7.64353		216.387	19.2405		312.352	12.0435		215.509	22.3758		216.467	5.15245
311.091	12.4429		313.071	1.33935		312.826	3.79163		312.111	-0.0104978		313.998	7.62178		216.553	19.2403		312.602	12.0431		215.676	22.3757		216.633	5.1524
311.342	12.4347		313.321	1.31758		313.076	3.76876		312.361	-0.0105158		314.247	7.6001		216.721	19.2402		312.852	12.0428		215.843	22.3756		216.8	5.15235
311.592	12.4279		313.57	1.29645		313.325	3.74573		312.61	-0.0105278		314.497	7.578		216.887	19.2401		313.102	12.0424		216.008	22.3754		216.966	5.1523
311.842	12.4214		313.82	1.27503		313.575	3.72234		312.859	-0.010541		314.747	7.55582		217.054	19.24		313.351	12.042		216.175	22.3753		217.132	5.15228
312.092	12.4145		314.07	1.25385		313.826	3.69893		313.108	-0.0105588		314.996	7.53339		217.221	19.2399		313.601	12.0416		216.341	22.3752		217.299	5.15222
312.342	12.4064		314.319	1.2327		314.074	3.6753		313.357	-0.01058		315.246	7.51081		217.388	19.2398		313.85	12.0413		216.508	22.375		217.466	5.15216
312.592	12.398		314.568	1.21194		314.324	3.65175		313.607	-0.0106041		315.495	7.48817		217.553	19.2397		314.101	12.0409		216.674	22.3749		217.631	5.1521
312.842	12.3909		314.818	1.19151		314.574	3.62788		313.857	-0.0106278		315.745	7.46536		217.72	19.2395		314.35	12.0405		216.84	22.3748		217.798	5.15205
313.091	12.3846		315.068	1.17141		314.823	3.6042		314.108	-0.0106448		315.994	7.44261		217.887	19.2394		314.6	12.0401		217.008	22.3746		217.964	5.152
313.342	12.3773		315.317	1.15115		315.072	3.5802		314.358	-0.0106573		316.244	7.41952		218.054	19.2393		314.849	12.0398		217.174	22.3745		218.132	5.15195
313.591	12.3686		315.567	1.13154		315.322	3.5562		314.608	-0.0106684		316.494	7.39629		218.22	19.2392		315.099	12.0394		217.341	22.3744		218.297	5.15191
313.841	12.3616		315.816	1.11216		315.572	3.53191		314.859	-0.0106802		316.744	7.37277		218.386	19.2391		315.348	12.039		217.507	22.3743		218.463	5.15186
314.091	12.3545		316.065	1.093		315.822	3.50764		315.111	-0.010695		316.994	7.34915		218.552	19.2389		315.597	12.0386		217.673	22.3742		218.63	5.15181
314.341	12.3468		316.314	1.07416		316.071	3.48316		315.361	-0.0107118		317.243	7.32521		218.719	19.2388		315.847	12.0382		217.84	22.374		218.797	5.15176
314.59	12.3391		316.564	1.05567		316.322	3.45878		315.61	-0.0107273		317.493	7.30129		218.886	19.2387		316.096	12.0379		218.007	22.3739		218.963	5.15171
314.841	12.3313		316.813	1.03781		316.572	3.43394		315.86	-0.0107398		317.742	7.2772		219.052	19.2386		316.346	12.0375		218.174	22.3738		219.129	5.15166
315.091	12.3227		317.062	1.02017		316.822	3.40917		316.11	-0.0107494		317.992	7.25312		219.218	19.2385		316.595	12.0371		218.34	22.3737		219.295	5.15161
315.34	12.3151		317.312	1.00314		317.071	3.3843		316.36	-0.0107596		318.242	7.22877		219.384	19.2384		316.845	12.0367		218.507	22.3736		219.462	5.15156
315.591	12.3079		317.561	0.986138		317.322	3.35932		316.61	-0.0107682		318.491	7.20424		219.551	19.2382		317.094	12.0363		218.672	22.3734		219.628	5.15151
315.84	12.3001		317.81	0.969518		317.572	3.33386		316.859	-0.0107783		318.741	7.17939		219.717	19.2381		317.344	12.0359		218.839	22.3733		219.794	5.15146
316.089	12.2917		318.06	0.95348		317.822	3.3085		317.108	-0.010792		318.99	7.15457		219.883	19.238		317.595	12.0355		219.005	22.3732		219.961	5.15142
316.34	12.283		318.309	0.937715		318.072	3.28307		317.357	-0.0108037		319.24	7.12935		220.049	19.2379		317.844	12.0351		219.172	22.3731		220.127	5.15137
316.59	12.2747		318.558	0.922276		318.323	3.25754		317.606	-0.0108176		319.49	7.10413		220.215	19.2378		318.094	12.0347		219.338	22.373		220.293	5.15132
316.839	12.2673		318.807	0.907461		318.573	3.23199		317.854	-0.0108275		319.74	7.07857		220.381	19.2376		318.344	12.0343		219.504	22.3728		220.46	5.15127
317.088	12.2601		319.057	0.893068		318.824	3.2064		318.102	-0.010832		319.989	7.05318		220.548	19.2375		318.594	12.0339		219.671	22.3727		220.625	5.15121
317.339	12.2508		319.306	0.879149		319.073	3.1805		318.352	-0.0108331		320.239	7.02764		220.715	19.2374		318.844	12.0335		219.837	22.3726		220.792	5.15116
317.588	12.2418		319.555	0.865515		319.324	3.15465		318.601	-0.0108355		320.488	7.00166		220.882	19.2373		319.094	12.0331		220.002	22.3725		220.958	5.15111
317.838	12.2343		319.804	0.852169		319.574	3.1284		318.85	-0.0108395		320.737	6.97548		221.048	19.2372		319.344	12.0327		220.169	22.3723		221.125	5.15106
318.087	12.2271		320.054	0.839464		319.823	3.10205		319.099	-0.0108494		320.986	6.9493		221.215	19.2371		319.593	12.0323		220.336	22.3722		221.291	5.15101
318.337	12.2185		320.303	0.827026		320.074	3.07556		319.348	-0.0108604		321.237	6.92284		221.381	19.2369		319.842	12.0319		220.502	22.3721		221.457	5.15096
318.587	12.2093		320.552	0.815259		320.324	3.04906		319.598	-0.0108708		321.487	6.89643		221.548	19.2368		320.091	12.0314		220.669	22.372		221.624	5.15091
318.836	12.2012		320.802	0.803711		320.574	3.02252		319.846	-0.0108774		321.736	6.86989		221.714	19.2367		320.341	12.031		220.835	22.3718		221.79	5.15085
319.086	12.1936		321.051	0.792895		320.824	2.996		320.095	-0.0108803		321.985	6.84303		221.881	19.2366		320.592	12.0306		221.001	22.3717		221.957	5.1508
319.336	12.1855		321.301	0.782379		321.073	2.96931		320.345	-0.0108841		322.235	6.8163		222.047	19.2365		320.84	12.0302		221.168	22.3716		222.123	5.15075
319.585	12.177		321.55	0.772624		321.323	2.9425		320.595	-0.0108876		322.485	6.7891		222.214	19.2363		321.09	12.0297		221.334	22.3715		222.289	5.1507
319.835	12.1678		321.799	0.762847		321.574	2.91531		320.844	-0.0108952		322.734	6.76172		222.38	19.2362		321.34	12.0293		221.5	22.3714		222.456	5.15065
320.085	12.1587		322.049	0.753795		321.823	2.88832		321.093	-0.0109058		322.983	6.73458		222.546	19.2361		321.59	12.0289		221.667	22.3712		222.621	5.1506
320.334	12.1501		322.298	0.745135		322.074	2.86085		321.342	-0.0109189		323.234	6.70719		222.714	19.236		321.84	12.0285		221.834	22.3711		222.79	5.15055
320.583	12.1418		322.548	0.737093		322.324	2.83349		321.591	-0.0109302		323.484	6.67981		222.88	19.2358		322.09	12.028		222.001	22.3711		222.956	5.15049
320.833	12.1333		322.798	0.729486		322.575	2.80607		321.84	-0.0109374		323.732	6.65201		223.046	19.2357		322.339	12.0276		222.167	22.371		223.122	5.15043
321.082	12.1244		323.047	0.72229		322.823	2.77857		322.088	-0.0109392		323.982	6.62397		223.213	19.2356		322.589	12.0272		222.334	22.3708		223.288	5.15038
321.333	12.1149		323.296	0.7153		323.074	2.75083		322.338	-0.0109394		324.231	6.59562		223.379	19.2355		322.839	12.0267		222.5	22.3707		223.455	5.15032
321.583	12.1056		323.546	0.708742		323.324	2.72322		322.588	-0.010939		324.481	6.56705		223.546	19.2353		323.088	12.0263		222.667	22.3706		223.621	5.15027
321.832	12.0973		323.795	0.702438		323.574	2.69511		322.837	-0.0109483		324.73	6.53836		223.711	19.2352		323.338	12.0259		222.833	22.3705		223.788	5.15022
322.082	12.0886		324.046	0.696541		323.825	2.66707		323.086	-0.0109627		324.979	6.50939		223.878	19.2351		323.587	12.0254		223	22.3704		223.954	5.15017
322.332	12.0777		324.295	0.691117		324.074	2.63897		323.335	-0.0109674		325.229	6.48032		224.043	19.2349		323.837	12.025		223.166	22.3703		224.12	5.15012
322.581	12.0682		324.544	0.686025		324.323	2.61083		323.584	-0.0109679		325.479	6.45104		224.21	19.2348		324.087	12.0245		223.332	22.3702		224.286	5.15006
322.831	12.06		324.795	0.681398		324.574	2.58257		323.834	-0.010962		325.729	6.42168		224.377	19.2347		324.336	12.0241		223.498	22.3701		224.453	5.15
323.082	12.0516		325.045	0.676976		324.825	2.55437		324.084	-0.0109549		325.978	6.39207		224.544	19.2346		324.586	12.0236		223.664	22.37		224.62	5.14995
323.332	12.042		325.295	0.672767		325.074	2.52594		324.333	-0.0109539		326.228	6.3621		224.71	19.2344		324.837	12.0232		223.83	22.3699		224.787	5.14989
323.581	12.0315		325.545	0.668654		325.325	2.49754		324.583	-0.0109583		326.478	6.33194		224.877	19.2343		325.086	12.0227		223.997	22.3698		224.952	5.14984
323.832	12.0217		325.795	0.664808		325.574	2.46869		324.832	-0.0109616		326.728	6.30179		225.043	19.2342		325.336	12.0222		224.163	22.3697		225.12	5.14979
324.08	12.0126		326.045	0.66116		325.824	2.43996		325.082	-0.0109686		326.978	6.2712		225.209	19.2341		325.586	12.0218		224.329	22.3696		225.285	5.14974
324.33	12.0036		326.295	0.657864		326.073	2.41096		325.332	-0.0109744		327.228	6.24053		225.375	19.2339		325.836	12.0213		224.496	22.3695		225.451	5.14968
324.58	11.9934		326.545	0.654779		326.323	2.38174		325.581	-0.0109722		327.478	6.20961		225.542	19.2338		326.086	12.0208		224.663	22.3694		225.618	5.14962
324.831	11.983		326.796	0.651983		326.573	2.35286		325.83	-0.0109684		327.727	6.17853		225.708	19.2337		326.336	12.0204		224.829	22.3693		225.784	5.14956
325.08	11.9733		327.045	0.649344		326.823	2.32385		326.08	-0.0109665		327.976	6.14697		225.875	19.2335		326.585	12.0199		224.995	22.3691		225.951	5.14951
325.33	11.9636		327.296	0.646824		327.072	2.29484		326.331	-0.010969		328.226	6.11547		226.041	19.2334		326.835	12.0194		225.162	22.369		226.117	5.14945
325.581	11.9536		327.546	0.644362		327.322	2.26568		326.581	-0.0109704		328.476	6.08354		226.208	19.2333		327.084	12.0189		225.328	22.3689		226.283	5.1494
325.83	11.9435		327.796	0.642074		327.572	2.2363		326.83	-0.0109688		328.726	6.05165		226.374	19.2332		327.333	12.0184		225.495	22.3688		226.449	5.14934
326.082	11.9327		328.047	0.639791		327.822	2.20675		327.08	-0.0109704		328.975	6.01961		226.541	19.233		327.583	12.018		225.661	22.3687		226.616	5.14928
326.332	11.9216		328.296	0.637731		328.071	2.17712		327.329	-0.0109756		329.225	5.98717		226.708	19.2329		327.833	12.0175		225.827	22.3686		226.782	5.14922
326.582	11.9114		328.546	0.635837		328.321	2.1476		327.579	-0.0109781		329.476	5.95445		226.874	19.2328		328.082	12.017		225.995	22.3685		226.949	5.14916
326.833	11.9019		328.797	0.634115		328.57	2.1176		327.829	-0.0109768		329.724	5.92157		227.041	19.2326		328.332	12.0165		226.161	22.3684		227.116	5.1491
327.082	11.8919		329.047	0.632495		328.82	2.08798		328.079	-0.0109766		329.974	5.88849		227.207	19.2325		328.582	12.016		226.327	22.3683		227.283	5.14905
327.333	11.8798		329.296	0.630965		329.07	2.05826		328.329	-0.010977		330.224	5.85518		227.374	19.2324		328.831	12.0155		226.494	22.3682		227.45	5.14899
327.583	11.8683		329.546	0.629452		329.32	2.02852		328.579	-0.0109807		330.474	5.82168		227.54	19.2323		329.081	12.015		226.66	22.3681		227.615	5.14894
327.834	11.8581		329.797	0.627976		329.569	1.99853		328.828	-0.0109866		330.724	5.78791		227.707	19.2321		329.332	12.0145		226.827	22.368		227.783	5.14888
328.084	11.848		330.048	0.626589		329.819	1.96858		329.077	-0.0109978		330.973	5.75389		227.872	19.232		329.581	12.0139		226.994	22.3678		227.949	5.14882
328.334	11.8367		330.298	0.625267		330.069	1.93845		329.327	-0.0110075		331.222	5.7196		228.039	19.2319		329.831	12.0134		227.16	22.3677		228.116	5.14876
328.584	11.8245		330.548	0.624014		330.319	1.90819		329.577	-0.0110161		331.473	5.68513		228.205	19.2317		330.082	12.0129		227.326	22.3676		228.283	5.1487
328.834	11.8131		330.799	0.622925		330.568	1.87817		329.827	-0.0110168		331.723	5.65047		228.372	19.2316		330.331	12.0124		227.493	22.3675		228.449	5.14864
329.085	11.8029		331.049	0.621883		330.819	1.84801		330.076	-0.0110186		331.972	5.61546		228.538	19.2315		330.581	12.0118		227.659	22.3673		228.616	5.14858
329.333	11.792		331.298	0.620897		331.068	1.81776		330.326	-0.0110235		332.222	5.58029		228.704	19.2313		330.83	12.0113		227.825	22.3671		228.782	5.14852
329.584	11.7794		331.549	0.619877		331.319	1.78761		330.576	-0.0110365		332.472	5.54513		228.869	19.2312		331.08	12.0107		227.991	22.367		228.95	5.14846
329.832	11.767		331.798	0.618891		331.569	1.75735		330.826	-0.0110537		332.721	5.50955		229.036	19.2311		331.33	12.0102		228.158	22.3668		229.115	5.1484
330.083	11.7554		332.049	0.617917		331.819	1.72703		331.076	-0.0110709		332.971	5.47374		229.203	19.2309		331.579	12.0097		228.325	22.3666		229.282	5.14834
330.333	11.7437		332.298	0.617027		332.07	1.69659		331.325	-0.0110896		333.221	5.43751		229.369	19.2308		331.83	12.0091		228.49	22.3665		229.449	5.14828
330.582	11.7318		332.548	0.61619		332.32	1.66624		331.575	-0.0111027		333.471	5.40101		229.537	19.2307		332.08	12.0086		228.656	22.3663		229.615	5.14822
330.832	11.7197		332.798	0.615447		332.571	1.63597		331.825	-0.0111057		333.72	5.36427		229.702	19.2306		332.329	12.008		228.823	22.3661		229.783	5.14816
331.083	11.7069		333.048	0.614736		332.821	1.60574		332.076	-0.0111117		333.969	5.32744		229.869	19.2304		332.58	12.0074		228.989	22.3658		229.949	5.1481
331.332	11.694		333.298	0.614017		333.071	1.57568		332.325	-0.0111209		334.219	5.29044		230.035	19.2303		332.829	12.0069		229.155	22.3656		230.116	5.14804
331.582	11.6816		333.548	0.613316		333.322	1.54565		332.576	-0.0111279		334.468	5.25338		230.202	19.2302		333.079	12.0063		229.322	22.3654		230.282	5.14798
331.832	11.6693		333.798	0.612631		333.571	1.51536		332.826	-0.0111456		334.719	5.21587		230.368	19.23		333.328	12.0057		229.489	22.3652		230.448	5.14792
332.083	11.6566		334.048	0.611939		333.82	1.48531		333.075	-0.011169		334.968	5.17818		230.534	19.2299		333.577	12.0051		229.655	22.365		230.615	5.14785
332.334	11.6428		334.298	0.611261		334.07	1.45522		333.326	-0.0111916		335.217	5.14003		230.702	19.2297		333.827	12.0045		229.821	22.3648		230.782	5.14779
332.583	11.6295		334.548	0.610666		334.321	1.42531		333.575	-0.0112117		335.467	5.10162		230.867	19.2296		334.077	12.0039		229.988	22.3646		230.948	5.14772
332.833	11.6166		334.798	0.610103		334.57	1.39531		333.826	-0.0112336		335.717	5.06326		231.034	19.2295		334.326	12.0033		230.155	22.3644		231.114	5.14766
333.083	11.6042		335.048	0.609523		334.82	1.36586		334.075	-0.0112511		335.967	5.02446		231.2	19.2294		334.575	12.0027		230.32	22.3642		231.281	5.14761
333.333	11.5899		335.298	0.608937		335.07	1.33655		334.325	-0.0112598		336.216	4.98561		231.366	19.2292		334.824	12.0021		230.487	22.364		231.448	5.14755
333.583	11.5752		335.548	0.608333		335.32	1.30739		334.574	-0.0112688		336.466	4.94644		231.533	19.2291		335.074	12.0015		230.653	22.3638		231.614	5.14749
333.833	11.5613		335.797	0.607723		335.569	1.27819		334.824	-0.0113025		336.715	4.90706		231.699	19.2289		335.323	12.0008		230.819	22.3636		231.781	5.14742
334.083	11.5484		336.047	0.607101		335.819	1.24932		335.075	-0.0113322		336.966	4.86717		231.865	19.2288		335.573	12.0002		230.986	22.3634		231.948	5.14736
334.334	11.5346		336.296	0.606479		336.068	1.22057		335.325	-0.0113536		337.216	4.82717		232.032	19.2287		335.823	11.9996		231.152	22.3632		232.113	5.14729
334.584	11.5198		336.546	0.605857		336.317	1.19207		335.574	-0.0113679		337.465	4.78698		232.197	19.2285		336.072	11.9989		231.319	22.363		232.28	5.14723
334.834	11.505		336.797	0.605234		336.566	1.16383		335.825	-0.0113693		337.714	4.74653		232.364	19.2284		336.322	11.9983		231.485	22.3628		232.446	5.14717
335.085	11.491		337.047	0.604608		336.817	1.13601		336.075	-0.0113514		337.964	4.70595		232.53	19.2283		336.572	11.9976		231.652	22.3626		232.613	5.14711
335.333	11.4765		337.296	0.603974		337.065	1.10845		336.325	-0.0113462		338.213	4.66507		232.697	19.2281		336.821	11.9969		231.818	22.3624		232.779	5.14705
335.584	11.4619		337.546	0.603337		337.315	1.08136		336.575	-0.0113517		338.462	4.62391		232.864	19.228		337.071	11.9962		231.984	22.3622		232.945	5.14699
335.835	11.4469		337.796	0.602694		337.565	1.05434		336.825	-0.0113487		338.713	4.5823		233.03	19.2278		337.32	11.9956		232.151	22.362		233.111	5.14692
336.084	11.4315		338.046	0.602054		337.813	1.02782		337.075	-0.0113522		338.963	4.54048		233.196	19.2277		337.571	11.9949		232.318	22.3618		233.277	5.14686
336.335	11.4164		338.296	0.601414		338.06	1.00157		337.326	-0.0113501		339.212	4.49838		233.364	19.2276		337.82	11.9942		232.484	22.3616		233.444	5.14679
336.584	11.4017		338.546	0.600779		338.311	0.97572		337.576	-0.0113372		339.462	4.45616		233.53	19.2274		338.069	11.9934		232.651	22.3614		233.61	5.14673
336.834	11.3865		338.796	0.600151		338.559	0.950309		337.825	-0.0113271		339.712	4.41366		233.697	19.2273		338.319	11.9927		232.818	22.3612		233.777	5.14667
337.084	11.3707		339.046	0.599529		338.808	0.925462		338.076	-0.0113063		339.962	4.371		233.863	19.2272		338.569	11.992		232.984	22.361		233.942	5.14661
337.334	11.3545		339.295	0.598902		339.057	0.901216		338.326	-0.0112621		340.211	4.32809		234.031	19.227		338.819	11.9913		233.151	22.3608		234.109	5.14655
337.584	11.3383		339.546	0.598275		339.306	0.877574		338.575	-0.0112043		340.46	4.28479		234.198	19.2269		339.069	11.9905		233.317	22.3607		234.275	5.14649
337.834	11.3227		339.795	0.597646		339.555	0.854383		338.826	-0.0111384		340.71	4.24107		234.365	19.2267		339.319	11.9897		233.483	22.3605		234.443	5.14642
338.084	11.3075		340.045	0.597018		339.804	0.831733		339.076	-0.0111212		340.959	4.19722		234.531	19.2266		339.569	11.989		233.65	22.3603		234.608	5.14635
338.334	11.2907		340.296	0.596397		340.053	0.809828		339.327	-0.0111374		341.209	4.1529		234.698	19.2264		339.817	11.9882		233.816	22.3601		234.776	5.14629
338.584	11.2737		340.546	0.595785		340.303	0.788709		339.576	-0.0111361		341.459	4.10859		234.865	19.2263		340.068	11.9874		233.983	22.3599		234.942	5.14623
338.835	11.2573		340.795	0.595182		340.551	0.76816		339.826	-0.0111326		341.708	4.06409		235.032	19.2262		340.317	11.9866		234.15	22.3597		235.108	5.14616
339.085	11.2415		341.045	0.594583		340.8	0.748609		340.078	-0.0111342		341.958	4.01929		235.198	19.226		340.566	11.9857		234.316	22.3595		235.275	5.1461
339.334	11.2248		341.295	0.593984		341.048	0.729753		340.328	-0.0111533		342.206	3.97397		235.364	19.2259		340.817	11.9847		234.481	22.3593		235.442	5.14603
339.584	11.2073		341.545	0.593392		341.297	0.712022		340.579	-0.0111793		342.456	3.92862		235.53	19.2257		341.066	11.9836		234.649	22.3591		235.608	5.14597
339.834	11.1899		341.795	0.592802		341.545	0.694803		340.829	-0.0112067		342.705	3.88297		235.697	19.2256		341.316	11.9824		234.815	22.359		235.774	5.14589
340.084	11.1733		342.044	0.592219		341.794	0.678542		341.08	-0.0112294		342.955	3.83689		235.863	19.2255		341.566	11.9813		234.981	22.3588		235.94	5.14582
340.334	11.1565		342.294	0.591645		342.041	0.662985		341.332	-0.0112395		343.204	3.79065		236.029	19.2253		341.816	11.9801		235.148	22.3586		236.106	5.14575
340.583	11.1388		342.544	0.591079		342.289	0.648601		341.583	-0.0112284		343.454	3.74438		236.196	19.2252		342.065	11.9787		235.315	22.3584		236.273	5.14568
340.833	11.1207		342.795	0.59052		342.538	0.634784		341.834	-0.0112377		343.704	3.69782		236.362	19.225		342.316	11.9773		235.481	22.3582		236.439	5.14562
341.083	11.1027		343.043	0.589965		342.785	0.621748		342.085	-0.0112453		343.952	3.65088		236.527	19.2249		342.566	11.9757		235.647	22.358		236.605	5.14555
341.333	11.0848		343.293	0.589412		343.034	0.609966		342.336	-0.0112555		344.202	3.60311		236.694	19.2247		342.816	11.9741		235.814	22.3578		236.772	5.14548
341.582	11.067		343.543	0.588856		343.282	0.599089		342.587	-0.0112323		344.452	3.5553		236.86	19.2246		343.065	11.9724		235.98	22.3577		236.938	5.14541
341.832	11.0487		343.793	0.588303		343.53	0.589033		342.837	-0.0112278		344.701	3.50731		237.026	19.2244		343.315	11.9707		236.146	22.3575		237.105	5.14534
342.082	11.0306		344.043	0.58776		343.778	0.579631		343.087	-0.0112216		344.951	3.45921		237.193	19.2243		343.565	11.9691		236.313	22.3573		237.271	5.14527
342.332	11.0118		344.292	0.587229		344.027	0.571082		343.338	-0.0112397		345.2	3.41066		237.358	19.2242		343.814	11.9675		236.479	22.3571		237.438	5.14521
342.582	10.9935		344.542	0.586711		344.275	0.563353		343.588	-0.0112427		345.451	3.36205		237.525	19.224		344.064	11.9658		236.645	22.3569		237.604	5.14514
342.832	10.975		344.792	0.5862		344.523	0.556553		343.837	-0.0112436		345.7	3.31302		237.692	19.2239		344.313	11.9641		236.812	22.3567		237.77	5.14508
343.082	10.9567		345.041	0.585696		344.772	0.550319		344.085	-0.0112292		345.95	3.26371		237.858	19.2237		344.564	11.9622		236.979	22.3565		237.937	5.14501
343.332	10.9373		345.291	0.585197		345.02	0.544796		344.334	-0.0111707		346.2	3.21384		238.024	19.2236		344.812	11.9603		237.145	22.3564		238.103	5.14494
343.581	10.9178		345.541	0.584702		345.269	0.539849		344.584	-0.0111088		346.45	3.16412		238.19	19.2234		345.061	11.9585		237.312	22.3562		238.27	5.14486
343.832	10.8993		345.791	0.58421		345.518	0.535509		344.832	-0.0110992		346.701	3.11382		238.357	19.2233		345.312	11.9567		237.478	22.356		238.436	5.14478
344.081	10.881		346.041	0.58372		345.767	0.531344		345.081	-0.011096		346.949	3.06339		238.524	19.2231		345.561	11.9549		237.645	22.3558		238.604	5.14471
344.331	10.8618		346.291	0.583238		346.015	0.527484		345.33	-0.0110992		347.2	3.01264		238.689	19.223		345.811	11.9531		237.811	22.3557		238.769	5.14464
344.581	10.8418		346.54	0.582766		346.265	0.524151		345.579	-0.0110987		347.449	2.96158		238.856	19.2228		346.061	11.9511		237.978	22.3555		238.936	5.14457
344.831	10.8221		346.79	0.5823		346.514	0.521107		345.828	-0.0110969		347.698	2.9103		239.024	19.2227		346.311	11.949		238.144	22.3553		239.101	5.14451
345.081	10.8032		347.04	0.581837		346.764	0.518323		346.077	-0.0111207		347.947	2.85881		239.189	19.2225		346.561	11.9468		238.311	22.3551		239.269	5.14444
345.331	10.7842		347.29	0.581372		347.013	0.51593		346.327	-0.0111305		348.197	2.80695		239.356	19.2224		346.81	11.9447		238.477	22.355		239.435	5.14437
345.581	10.7646		347.54	0.58091		347.263	0.513729		346.577	-0.0111471		348.447	2.75476		239.522	19.2222		347.061	11.9426		238.644	22.3548		239.602	5.14431
345.83	10.7446		347.79	0.58045		347.512	0.511747		346.825	-0.0111634		348.696	2.70244		239.689	19.2221		347.31	11.9405		238.81	22.3546		239.768	5.14424
346.081	10.7254		348.039	0.580005		347.762	0.509926		347.074	-0.0111836		348.946	2.64991		239.855	19.2219		347.56	11.9383		238.976	22.3544		239.935	5.14417
346.331	10.706		348.289	0.579565		348.011	0.508248		347.323	-0.0111877		349.196	2.59677		240.022	19.2218		347.81	11.9359		239.143	22.3543		240.102	5.1441
346.58	10.6863		348.538	0.579131		348.263	0.506609		347.572	-0.0111965		349.446	2.54366		240.189	19.2216		348.059	11.9334		239.31	22.3541		240.268	5.14403
346.83	10.6663		348.789	0.578701		348.513	0.50508		347.822	-0.0112088		349.695	2.48991		240.355	19.2215		348.308	11.9309		239.475	22.3539		240.434	5.14396
347.081	10.6463		349.039	0.578274		348.764	0.503662		348.07	-0.011219		349.945	2.43593		240.522	19.2213		348.558	11.9286		239.643	22.3538		240.601	5.14389
347.331	10.6261		349.289	0.577844		349.014	0.50235		348.319	-0.0112318		350.194	2.38166		240.688	19.2212		348.807	11.9262		239.808	22.3536		240.768	5.14381
347.581	10.6065		349.539	0.577416		349.265	0.501158		348.568	-0.0112483		350.443	2.32721		240.856	19.221		349.057	11.9238		239.976	22.3534		240.934	5.14374
347.831	10.5871		349.789	0.576994		349.514	0.500122		348.817	-0.0112798		350.692	2.27263		241.022	19.2209		349.306	11.9213		240.143	22.3533		241.1	5.14367
348.08	10.5672		350.039	0.576581		349.765	0.499162		349.065	-0.0113013		350.942	2.21741		241.188	19.2207		349.556	11.9187		240.309	22.3531		241.267	5.1436
348.33	10.5469		350.288	0.576178		350.017	0.498308		349.314	-0.0113211		351.191	2.16208		241.355	19.2206		349.806	11.9161		240.475	22.3529		241.433	5.14353
348.579	10.5266		350.539	0.575777		350.266	0.497468		349.563	-0.0113317		351.441	2.10611		241.522	19.2204		350.055	11.9133		240.643	22.3527		241.6	5.14346
348.83	10.5065		350.788	0.57538		350.517	0.496615		349.812	-0.0113519		351.691	2.04995		241.688	19.2203		350.305	11.9107		240.808	22.3526		241.766	5.14338
349.08	10.4871		351.038	0.574982		350.769	0.495808		350.061	-0.0113663		351.939	1.99369		241.853	19.2201		350.555	11.908		240.975	22.3524		241.932	5.14331
349.329	10.4669		351.288	0.574585		351.02	0.495076		350.31	-0.0113688		352.189	1.93709		242.02	19.2199		350.804	11.9053		241.141	22.3522		242.099	5.14323
349.578	10.4466		351.538	0.574189		351.271	0.494412		350.559	-0.0113609		352.439	1.87991		242.186	19.2198		351.053	11.9026		241.307	22.3521		242.265	5.14316
349.827	10.4265		351.788	0.573796		351.522	0.493785		350.808	-0.0113335		352.688	1.82272		242.353	19.2197		351.302	11.8996		241.474	22.3519		242.431	5.14309
350.078	10.4072		352.039	0.573407		351.774	0.49323		351.057	-0.011313		352.937	1.76519		242.519	19.2195		351.551	11.8965		241.64	22.3517		242.598	5.14302
350.327	10.3877		352.288	0.573024		352.024	0.492696		351.307	-0.0113092		353.186	1.70724		242.685	19.2193		351.802	11.8934		241.806	22.3516		242.764	5.14295
350.577	10.3673		352.538	0.572649		352.276	0.492138		351.556	-0.0113121		353.436	1.6492		242.852	19.2192		352.052	11.8903		241.973	22.3514		242.93	5.14288
350.827	10.3469		352.788	0.572275		352.527	0.491625		351.806	-0.0113202		353.685	1.5909		243.018	19.219		352.301	11.8872		242.14	22.3512		243.096	5.14281
351.076	10.3272		353.038	0.571899		352.778	0.491085		352.056	-0.0113342		353.934	1.53238		243.185	19.2189		352.551	11.8841		242.306	22.3511		243.264	5.14274
351.326	10.3076		353.288	0.571524		353.028	0.49057		352.305	-0.0113449		354.183	1.47382		243.351	19.2187		352.801	11.881		242.471	22.3509		243.43	5.14266
351.575	10.2879		353.538	0.571151		353.279	0.490071		352.554	-0.0113483		354.434	1.41492		243.518	19.2186		353.051	11.8778		242.639	22.3507		243.596	5.14258
351.825	10.2681		353.788	0.570783		353.53	0.489565		352.803	-0.0113665		354.683	1.35581		243.684	19.2184		353.3	11.8744		242.804	22.3506		243.762	5.14251
352.075	10.2482		354.038	0.57042		353.78	0.489046		353.054	-0.0113778		354.933	1.29619		243.849	19.2182		353.549	11.8711		242.972	22.3504		243.93	5.14244
352.325	10.2285		354.287	0.570062		354.032	0.488519		353.303	-0.0113781		355.182	1.23655		244.016	19.2181		353.8	11.8677		243.137	22.3502		244.096	5.14236
352.574	10.2091		354.538	0.569706		354.281	0.487985		353.553	-0.0113747		355.432	1.17661		244.182	19.2179		354.049	11.8644		243.304	22.3501		244.262	5.14229
352.824	10.1896		354.787	0.569348		354.533	0.487442		353.802	-0.0113688		355.681	1.11648		244.349	19.2178		354.3	11.8609		243.47	22.3499		244.428	5.14221
353.074	10.1702		355.037	0.568987		354.784	0.486889		354.051	-0.0113597		355.93	1.05612		244.515	19.2176		354.55	11.8575		243.637	22.3498		244.595	5.14213
353.323	10.1505		355.287	0.568624		355.034	0.486331		354.301	-0.0113651		356.18	0.995779		244.681	19.2175		354.799	11.854		243.803	22.3496		244.762	5.14205
353.572	10.1312		355.536	0.568267		355.284	0.485773		354.551	-0.0113603		356.43	0.935237		244.847	19.2173		355.049	11.8502		243.97	22.3494		244.928	5.14197
353.822	10.1124		355.787	0.567909		355.535	0.485217		354.8	-0.0113504		356.68	0.874431		245.015	19.2172		355.299	11.8463		244.136	22.3493		245.094	5.1419
354.071	10.0938		356.038	0.567555		355.786	0.484663		355.05	-0.0113547		356.931	0.813483		245.18	19.217		355.548	11.8422		244.303	22.3491		245.26	5.14183
354.321	10.0745		356.287	0.567206		356.036	0.484111		355.3	-0.0113726		357.18	0.752647		245.348	19.2168		355.796	11.8382		244.469	22.3489		245.427	5.14176
354.571	10.055		356.537	0.566863		356.286	0.483555		355.549	-0.0113786		357.429	0.691854		245.514	19.2167		356.047	11.8341		244.636	22.3488		245.593	5.14169
354.82	10.0361		356.787	0.566518		356.536	0.482995		355.798	-0.0113795		357.678	0.631914		245.68	19.2165		356.296	11.83		244.802	22.3487		245.76	5.1416
355.07	10.0179		357.037	0.566174		356.787	0.482426		356.048	-0.0113778		357.927	0.572662		245.846	19.2163		356.546	11.8259		244.969	22.3485		245.926	5.14152
355.321	9.99944		357.287	0.565829		357.036	0.481857		356.297	-0.0113764		358.176	0.514554		246.012	19.2162		356.796	11.8214		245.135	22.3483		246.093	5.14144
355.569	9.9805		357.538	0.565482		357.287	0.481295		356.547	-0.0113789		358.425	0.457914		246.178	19.216		357.045	11.8171		245.302	22.3482		246.258	5.14136
355.82	9.96179		357.787	0.565134		357.537	0.480737		356.796	-0.0113852		358.673	0.40328		246.345	19.2159		357.295	11.8127		245.468	22.348		246.425	5.14128
356.068	9.94365		358.037	0.564792		357.788	0.480189		357.046	-0.0113862		358.921	0.350383		246.511	19.2157		357.545	11.8084		245.635	22.3479		246.592	5.14121
356.317	9.92573		358.286	0.564458		358.038	0.479646		357.296	-0.0113841		359.169	0.299452		246.677	19.2155		357.795	11.804		245.801	22.3477		246.758	5.14113
356.567	9.90718		358.536	0.564131		358.288	0.479101		357.546	-0.01137		359.416	0.25082		246.843	19.2154		358.045	11.7995		245.968	22.3475		246.924	5.14105
356.817	9.88844		358.787	0.563803		358.538	0.478561		357.796	-0.0113555		359.66	0.205483		247.009	19.2152		358.295	11.7949		246.134	22.3474		247.09	5.14097
357.066	9.8704		359.037	0.563473		358.788	0.478024		358.045	-0.0113575		359.906	0.164404		247.175	19.215		358.543	11.7901		246.301	22.3472		247.256	5.14088
357.316	9.85253		359.286	0.56314		359.038	0.477485		358.294	-0.0113678		360.15	0.127192		247.342	19.2149		358.793	11.7852		246.467	22.3471		247.423	5.1408
357.566	9.83451		359.537	0.562805		359.289	0.476951		358.544	-0.0113746		360.394	0.0944387		247.508	19.2147		359.043	11.78		246.633	22.3469		247.589	5.14072
357.816	9.81677		359.787	0.562471		359.537	0.476422		358.794	-0.0113692		360.637	0.0669973		247.675	19.2146		359.291	11.7749		246.8	22.3468		247.756	5.14064
358.066	9.79885		360.036	0.562143		359.788	0.475902		359.043	-0.0113686		360.879	0.0470484		247.842	19.2144		359.542	11.7697		246.967	22.3466		247.923	5.14057
358.315	9.78069		360.287	0.561818		360.039	0.475384		359.293	-0.0113775		361.12	0.0343233		248.008	19.2142		359.791	11.7644		247.133	22.3465		248.089	5.14049
358.565	9.76297		360.537	0.561498		360.288	0.474869		359.542	-0.011386		361.361	0.0280834		248.175	19.2141		360.041	11.759		247.298	22.3463		248.256	5.14041
358.815	9.74541		360.787	0.56118		360.538	0.474358		359.791	-0.0113766		361.599	0.0249929		248.343	19.2139		360.291	11.7536		247.466	22.3461		248.422	5.14032
359.065	9.72827		361.037	0.560861		360.788	0.473849		360.041	-0.0113757		361.837	0.0231235		248.509	19.2137		360.54	11.7483		247.631	22.346		248.588	5.14024
359.314	9.71027		361.287	0.560537		361.038	0.473344		360.291	-0.0113846		362.076	0.0215999		248.676	19.2136		360.79	11.7427		247.798	22.3458		248.755	5.14015
359.564	9.69222		361.537	0.560206		361.288	0.472847		360.541	-0.0114012		362.316	0.0203016		248.841	19.2134		361.04	11.7371		247.964	22.3456		248.921	5.14007
359.813	9.67436		361.786	0.559877		361.537	0.472364		360.79	-0.011413		362.556	0.0193061		249.008	19.2132		361.289	11.7314		248.132	22.3454		249.088	5.13999
360.063	9.65706		362.036	0.559552		361.787	0.471888		361.039	-0.0114173		362.799	0.0183415		249.175	19.2131		361.539	11.7255		248.298	22.3453		249.255	5.13992
360.314	9.6394		362.287	0.559235		362.037	0.471412		361.29	-0.0114218		363.046	0.0175379		249.342	19.2129		361.789	11.7193		248.464	22.3451		249.422	5.13983
360.563	9.62138		362.536	0.558924		362.287	0.470936		361.54	-0.0114242		363.295	0.0169381		249.509	19.2127		362.038	11.713		248.63	22.3449		249.588	5.13975
360.812	9.60351		362.786	0.558608		362.537	0.470464		361.788	-0.0114281		363.545	0.0163953		249.675	19.2126		362.289	11.7062		248.796	22.3448		249.755	5.13967
361.062	9.58627		363.037	0.558288		362.787	0.469995		362.039	-0.0114416		363.799	0.0159578		249.841	19.2124		362.538	11.6995		248.963	22.3446		249.92	5.13958
361.313	9.56913		363.286	0.557967		363.038	0.469532		362.29	-0.0114483		364.054	0.015519		250.007	19.2122		362.787	11.6927		249.129	22.3444		250.086	5.1395
361.561	9.55174		363.537	0.557641		363.286	0.469077		362.539	-0.011442		364.311	0.0151356		250.174	19.2121		363.036	11.6857		249.295	22.3442		250.253	5.13941
361.812	9.53391		363.788	0.557319		363.536	0.468629		362.788	-0.0114468		364.568	0.0148164		250.341	19.2119		363.286	11.6784		249.462	22.3441		250.419	5.13933
362.062	9.51661		364.037	0.557004		363.787	0.468189		363.039	-0.0114658		364.826	0.0145861		250.508	19.2117		363.535	11.6707		249.628	22.3439		250.585	5.13925
362.311	9.49919		364.286	0.556695		364.037	0.467754		363.288	-0.0114799		365.084	0.0143946		250.674	19.2115		363.784	11.6626		249.794	22.3437		250.752	5.13917
362.56	9.48175		364.537	0.556391		364.286	0.467326		363.538	-0.0114804		365.34	0.0142323		250.84	19.2114		364.034	11.6543		249.96	22.3436		250.918	5.13908
362.811	9.4639		364.787	0.556094		364.536	0.4669		363.786	-0.0114654		365.596	0.0140903		251.006	19.2112		364.283	11.646		250.126	22.3434		251.084	5.13899
363.061	9.44679		365.038	0.555791		364.787	0.466476		364.037	-0.0114436		365.851	0.0139358		251.173	19.211		364.533	11.6376		250.293	22.3433		251.251	5.1389
363.311	9.42974		365.288	0.555478		365.036	0.466055		364.286	-0.0114596		366.105	0.0137676		251.34	19.2109		364.783	11.629		250.459	22.3431		251.417	5.13882
363.56	9.41286		365.538	0.555161		365.287	0.465641		364.536	-0.0114766		366.36	0.0135879		251.506	19.2107		365.032	11.6201		250.626	22.3428		251.583	5.13874
363.81	9.39592		365.787	0.554846		365.537	0.465236		364.786	-0.0114893		366.613	0.0134068		251.673	19.2105		365.283	11.6109		250.792	22.3426		251.75	5.13865
364.06	9.37916		366.037	0.554533		365.787	0.46484		365.036	-0.0114979		366.866	0.0132242		251.838	19.2103		365.531	11.6013		250.959	22.3424		251.917	5.13857
364.31	9.36188		366.287	0.554224		366.038	0.464448		365.286	-0.0114993		367.117	0.0130382		252.005	19.2102		365.781	11.5915		251.125	22.3423		252.083	5.13848
364.56	9.34466		366.537	0.553918		366.287	0.464057		365.536	-0.0114959		367.37	0.012847		252.171	19.21		366.031	11.5812		251.292	22.3421		252.25	5.13839
364.809	9.32767		366.787	0.553613		366.538	0.46367		365.785	-0.0115078		367.622	0.0126502		252.337	19.2098		366.28	11.5709		251.458	22.3419		252.415	5.13831
365.059	9.31112		367.037	0.553305		366.788	0.463283		366.035	-0.0115307		367.874	0.0124461		252.503	19.2097		366.53	11.5604		251.624	22.3417		252.581	5.13822
365.31	9.29411		367.287	0.552993		367.038	0.462904		366.284	-0.0115315		368.127	0.0122384		252.669	19.2095		366.78	11.5493		251.792	22.3415		252.748	5.13814
365.56	9.27691		367.537	0.552677		367.288	0.462534		366.534	-0.0115102		368.381	0.0120321		252.836	19.2093		367.03	11.5376		251.958	22.3413		252.915	5.13805
365.81	9.25981		367.787	0.552362		367.538	0.462168		366.783	-0.0115087		368.634	0.0118279		253.003	19.2092		367.28	11.5254		252.124	22.3411		253.08	5.13796
366.059	9.24329		368.038	0.552049		367.788	0.46181		367.033	-0.0115146		368.888	0.0116308		253.169	19.209		367.529	11.5125		252.29	22.3409		253.246	5.13788
366.309	9.22681		368.288	0.551742		368.039	0.461458		367.283	-0.0115231		369.144	0.0114349		253.335	19.2088		367.778	11.499		252.456	22.3407		253.412	5.13779
366.56	9.21024		368.538	0.551438		368.288	0.461103		367.532	-0.0115247		369.398	0.0112379		253.502	19.2087		368.027	11.485		252.623	22.3405		253.579	5.13771
366.809	9.19322		368.788	0.551134		368.538	0.460751		367.781	-0.0115412		369.653	0.0110366		253.668	19.2085		368.276	11.4704		252.788	22.3403		253.745	5.13762
367.059	9.17666		369.039	0.550825		368.789	0.4604		368.031	-0.0115505		369.906	0.0108316		253.835	19.2083		368.526	11.4556		252.956	22.3401		253.911	5.13753
367.309	9.1602		369.288	0.550515		369.038	0.460055		368.28	-0.0115563		370.16	0.0106287		254.001	19.2081		368.775	11.4401		253.122	22.3398		254.078	5.13744
367.558	9.14351		369.539	0.550202		369.289	0.459718		368.529	-0.0115865		370.415	0.0104354		254.168	19.208		369.024	11.4244		253.289	22.3396		254.244	5.13735
367.809	9.12657		369.789	0.549887		369.538	0.459389		368.779	-0.01162		370.667	0.0102506		254.335	19.2078		369.274	11.408		253.455	22.3393		254.411	5.13726
368.058	9.10963		370.039	0.549574		369.789	0.459065		369.029	-0.0116446		370.92	0.0100728		254.501	19.2076		369.522	11.3915		253.621	22.339		254.577	5.13718
368.307	9.09264		370.289	0.549268		370.038	0.458746		369.279	-0.0116518		371.172	0.00989437		254.667	19.2074		369.772	11.3745		253.789	22.3387		254.743	5.13708
368.557	9.07574		370.539	0.548963		370.288	0.458427		369.529	-0.0116623		371.422	0.00971518		254.834	19.2073		370.021	11.3578		253.955	22.3384		254.91	5.13699
368.806	9.05876		370.789	0.548655		370.538	0.458108		369.779	-0.0116578		371.672	0.00954103		255.001	19.2071		370.27	11.341		254.121	22.3381		255.077	5.13689
369.055	9.04158		371.04	0.548348		370.787	0.457793		370.028	-0.0116681		371.921	0.00936737		255.168	19.2069		370.52	11.3236		254.288	22.3378		255.244	5.1368
369.305	9.02414		371.29	0.548038		371.037	0.457484		370.278	-0.01169		372.17	0.00920343		255.334	19.2067		370.768	11.306		254.455	22.3375		255.41	5.13671
369.555	9.00624		371.54	0.547723		371.287	0.457183		370.527	-0.0117019		372.419	0.00904703		255.501	19.2066		371.018	11.2873		254.622	22.3372		255.577	5.13662
369.804	8.98864		371.79	0.547408		371.537	0.456885		370.777	-0.0117247		372.668	0.00889635		255.667	19.2064		371.268	11.2678		254.788	22.337		255.744	5.13652
370.054	8.97115		372.04	0.547092		371.787	0.456597		371.027	-0.0117214		372.916	0.00874424		255.834	19.2062		371.517	11.2478		254.955	22.3367		255.91	5.13643
370.303	8.95321		372.29	0.546781		372.036	0.456311		371.276	-0.0117042		373.164	0.00858946		256.001	19.206		371.766	11.2276		255.121	22.3364		256.077	5.13633
370.553	8.93518		372.54	0.546474		372.286	0.456025		371.526	-0.0117022		373.412	0.00843687		256.168	19.2059		372.015	11.2071		255.288	22.3361		256.243	5.13624
370.802	8.91752		372.791	0.546168		372.535	0.455739		371.776	-0.0117044		373.661	0.00829306		256.334	19.2057		372.266	11.1858		255.455	22.3358		256.41	5.13615
371.052	8.90029		373.04	0.545863		372.785	0.455455		372.025	-0.0117096		373.909	0.00815554		256.5	19.2055		372.515	11.1637		255.62	22.3355		256.576	5.13606
371.302	8.88299		373.29	0.545552		373.035	0.455175		372.275	-0.0117167		374.16	0.00802336		256.667	19.2053		372.764	11.1415		255.787	22.3353		256.742	5.13596
371.551	8.86483		373.54	0.545236		373.285	0.454906		372.524	-0.0117207		374.41	0.00789537		256.833	19.2051		373.013	11.1189		255.954	22.335		256.909	5.13588
371.801	8.847		373.791	0.54492		373.535	0.454643		372.773	-0.0117204		374.66	0.00776424		256.999	19.2049		373.263	11.0958		256.12	22.3347		257.076	5.13578
372.051	8.82943		374.041	0.544609		373.784	0.454382		373.023	-0.0117269		374.911	0.00763226		257.166	19.2048		373.512	11.0725		256.286	22.3344		257.241	5.13569
372.301	8.81226		374.29	0.544301		374.034	0.454124		373.273	-0.0117105		375.162	0.0075058		257.333	19.2046		373.761	11.0492		256.452	22.3342		257.407	5.13559
372.551	8.79511		374.541	0.543993		374.285	0.453863		373.521	-0.0116967		375.413	0.00737991		257.499	19.2044		374.011	11.0259		256.618	22.3339		257.574	5.1355
372.8	8.77818		374.791	0.543688		374.534	0.453601		373.771	-0.0116894		375.662	0.00725698		257.666	19.2042		374.26	11.0024		256.784	22.3337		257.74	5.1354
373.05	8.761		375.041	0.543384		374.784	0.453342		374.021	-0.0116848		375.913	0.00714207		257.832	19.204		374.509	10.9786		256.951	22.3335		257.907	5.13531
373.3	8.74406		375.29	0.543077		375.033	0.453089		374.271	-0.011684		376.163	0.00703554		257.998	19.2038		374.759	10.9547		257.118	22.3332		258.072	5.13522
373.55	8.72702		375.541	0.542761		375.283	0.452842		374.52	-0.0116699		376.413	0.0069273		258.164	19.2037		375.008	10.9305		257.283	22.3331		258.24	5.13513
373.8	8.71012		375.79	0.542444		375.533	0.4526		374.77	-0.0116735		376.662	0.00681686		258.331	19.2035		375.257	10.906		257.449	22.3329		258.405	5.13503
374.05	8.69267		376.04	0.542132		375.783	0.452365		375.02	-0.0116853		376.911	0.00671234		258.497	19.2033		375.507	10.8805		257.616	22.3327		258.572	5.13493
374.3	8.67499		376.289	0.541824		376.031	0.452128		375.269	-0.0116975		377.159	0.00660849		258.664	19.2031		375.756	10.8525		257.782	22.3325		258.738	5.13483
374.55	8.65744		376.539	0.541516		376.282	0.451887		375.519	-0.0116984		377.408	0.00650625		258.83	19.2029		376.005	10.8214		257.948	22.3323		258.905	5.13474
374.801	8.63983		376.789	0.54121		376.532	0.451641		375.768	-0.0116892		377.657	0.00640917		258.997	19.2028		376.256	10.7896		258.114	22.3321		259.071	5.13464
375.05	8.62224		377.039	0.540904		376.781	0.451402		376.018	-0.011666		377.905	0.00631762		259.163	19.2026		376.504	10.7575		258.281	22.3319		259.237	5.13455
375.3	8.60416		377.29	0.540588		377.031	0.451166		376.267	-0.0116408		378.154	0.0062294		259.329	19.2024		376.754	10.7249		258.448	22.3317		259.404	5.13445
375.55	8.5858		377.538	0.54027		377.281	0.450939		376.516	-0.0116343		378.403	0.00614119		259.495	19.2022		377.003	10.6917		258.615	22.3315		259.57	5.13436
375.8	8.56768		377.788	0.539956		377.53	0.450719		376.765	-0.0116507		378.651	0.00605106		259.662	19.202		377.253	10.6588		258.781	22.3314		259.737	5.13426
376.05	8.54988		378.039	0.539644		377.78	0.450497		377.016	-0.0116792		378.899	0.00596142		259.828	19.2018		377.502	10.6256		258.947	22.3312		259.904	5.13416
376.301	8.53142		378.288	0.539337		378.029	0.45028		377.266	-0.011695		379.148	0.00588922		259.994	19.2016		377.751	10.5912		259.114	22.331		260.07	5.13406
376.551	8.51416		378.538	0.539029		378.28	0.450061		377.515	-0.0117208		379.398	0.00582428		260.16	19.2015		378	10.5552		259.28	22.3308		260.236	5.13396
376.8	8.49747		378.787	0.538722		378.528	0.449837		377.766	-0.0117514		379.648	0.00574093		260.326	19.2013		378.249	10.5183		259.446	22.3306		260.403	5.13387
377.05	8.4817		379.038	0.538412		378.778	0.449616		378.015	-0.0117518		379.897	0.00565805		260.492	19.2011		378.498	10.4803		259.613	22.3303		260.569	5.13377
377.301	8.46553		379.287	0.5381		379.028	0.4494		378.264	-0.0117619		380.148	0.00558367		260.658	19.2009		378.747	10.4415		259.78	22.3301		260.735	5.13368
377.55	8.44936		379.537	0.537784		379.278	0.449187		378.514	-0.0117924		380.397	0.00550995		260.825	19.2007		378.996	10.4016		259.946	22.3299		260.901	5.13358
377.801	8.43294		379.787	0.537463		379.527	0.448979		378.764	-0.0118272		380.646	0.0054368		260.991	19.2005		379.245	10.3613		260.113	22.3297		261.067	5.13348
378.051	8.41658		380.036	0.53715		379.778	0.448771		379.014	-0.0118472		380.896	0.00536871		261.159	19.2003		379.495	10.3218		260.279	22.3295		261.234	5.13338
378.3	8.4005		380.286	0.536841		380.027	0.448563		379.264	-0.0118667		381.146	0.00530443		261.325	19.2002		379.744	10.2834		260.446	22.3293		261.4	5.13328
378.549	8.38403		380.536	0.536531		380.276	0.448351		379.513	-0.0118804		381.396	0.0052412		261.491	19.2		379.993	10.2452		260.611	22.3291		261.567	5.13317
378.799	8.36706		380.786	0.536223		380.526	0.448138		379.763	-0.0118851		381.646	0.00518885		261.658	19.1998		380.242	10.2056		260.778	22.3288		261.732	5.13308
379.049	8.34984		381.036	0.535912		380.775	0.447928		380.012	-0.0118919		381.895	0.00513802		261.825	19.1996		380.491	10.1647		260.944	22.3286		261.899	5.13298
379.298	8.33241		381.286	0.535598		381.024	0.447724		380.262	-0.0119093		382.145	0.0050806		261.992	19.1994		380.74	10.1235		261.112	22.3284		262.066	5.13288
379.549	8.31521		381.534	0.535282		381.274	0.447528		380.511	-0.0119299		382.394	0.00502043		262.158	19.1992		380.989	10.0826		261.277	22.3281		262.233	5.13278
379.798	8.29765		381.784	0.534966		381.524	0.447339		380.761	-0.0119369		382.644	0.00496225		262.326	19.199		381.238	10.0414		261.444	22.3279		262.399	5.13268
380.048	8.27951		382.035	0.534648		381.774	0.447148		381.011	-0.0119495		382.893	0.00490656		262.491	19.1988		381.488	9.99875		261.611	22.3277		262.566	5.13257
380.298	8.26141		382.284	0.534336		382.023	0.446952		381.26	-0.0119534		383.142	0.00485535		262.658	19.1986		381.737	9.95485		261.777	22.3274		262.732	5.13247
380.548	8.24331		382.534	0.534029		382.273	0.446751		381.51	-0.0119652		383.391	0.00480814		262.824	19.1984		381.987	9.91007		261.944	22.3272		262.899	5.13236
380.798	8.22519		382.784	0.53372		382.523	0.446551		381.76	-0.0119749		383.641	0.00475569		262.991	19.1982		382.237	9.8657		262.111	22.327		263.066	5.13226
381.048	8.20703		383.033	0.533409		382.771	0.446351		382.009	-0.0119816		383.89	0.00470495		263.156	19.198		382.486	9.82087		262.277	22.3268		263.231	5.13215
381.298	8.18872		383.282	0.533096		383.022	0.446159		382.259	-0.0119862		384.141	0.00465031		263.324	19.1978		382.736	9.77541		262.443	22.3265		263.398	5.13206
381.547	8.17028		383.532	0.532774		383.272	0.445967		382.51	-0.0120024		384.39	0.00459814		263.49	19.1976		382.986	9.72921		262.61	22.3263		263.565	5.13195
381.798	8.1527		383.782	0.532455		383.521	0.445785		382.759	-0.0120058		384.639	0.00455532		263.656	19.1975		383.235	9.68292		262.777	22.326		263.731	5.13185
382.047	8.13603		384.031	0.532144		383.772	0.4456		383.008	-0.0120082		384.889	0.00451508		263.822	19.1973		383.485	9.63633		262.943	22.3257		263.897	5.13174
382.298	8.11962		384.281	0.531834		384.022	0.445416		383.258	-0.012027		385.138	0.00448027		263.989	19.1971		383.734	9.58949		263.11	22.3254		264.064	5.13163
382.547	8.10366		384.53	0.531527		384.271	0.445226		383.508	-0.0120421		385.387	0.00444403		264.155	19.1969		383.984	9.54189		263.276	22.3251		264.229	5.13152
382.796	8.0857		384.779	0.53122		384.52	0.445034		383.757	-0.0120409		385.637	0.00440226		264.321	19.1967		384.234	9.49341		263.443	22.3248		264.397	5.13142
383.046	8.06934		385.028	0.530907		384.77	0.444844		384.007	-0.0120212		385.887	0.00436277		264.488	19.1965		384.483	9.44405		263.609	22.3244		264.563	5.13131
383.295	8.05372		385.278	0.530589		385.02	0.444654		384.256	-0.012006		386.136	0.00432329		264.654	19.1963		384.733	9.39376		263.776	22.3241		264.73	5.13121
383.543	8.03813		385.527	0.530269		385.27	0.444465		384.506	-0.0119914		386.386	0.004284		264.82	19.1961		384.982	9.34289		263.942	22.3238		264.896	5.1311
383.793	8.02219		385.777	0.529953		385.519	0.444284		384.755	-0.0119824		386.636	0.00425129		264.986	19.1959		385.232	9.29197		264.109	22.3235		265.062	5.13099
384.042	8.00642		386.026	0.529637		385.769	0.444103		385.005	-0.0119886		386.886	0.00422449		265.153	19.1957		385.481	9.2409		264.275	22.3232		265.229	5.13088
384.291	7.9907		386.276	0.529326		386.019	0.44392		385.254	-0.0120013		387.136	0.00419426		265.32	19.1955		385.732	9.18955		264.441	22.3229		265.396	5.13077
384.54	7.9747		386.525	0.529017		386.269	0.44373		385.503	-0.0120268		387.386	0.00415792		265.486	19.1953		385.981	9.13828		264.608	22.3226		265.563	5.13066
384.789	7.95804		386.774	0.528706		386.518	0.44354		385.752	-0.0120348		387.637	0.00412054		265.653	19.1951		386.23	9.08587		264.774	22.3223		265.729	5.13056
385.039	7.9418		387.024	0.528392		386.768	0.443354		386.002	-0.0120441		387.886	0.00408421		265.818	19.1949		386.481	9.03241		264.94	22.322		265.895	5.13045
385.289	7.92536		387.272	0.52807		387.017	0.443169		386.252	-0.0120614		388.136	0.00404987		265.985	19.1947		386.73	8.97781		265.106	22.3217		266.062	5.13034
385.538	7.90913		387.522	0.527747		387.267	0.442988		386.501	-0.0120784		388.387	0.00402374		266.152	19.1945		386.981	8.92303		265.272	22.3214		266.228	5.13023
385.787	7.89326		387.772	0.527425		387.517	0.442814		386.75	-0.0120666		388.638	0.00399561		266.317	19.1943		387.23	8.86724		265.439	22.3211		266.394	5.13012
386.037	7.87644		388.021	0.527107		387.766	0.44264		387	-0.0120778		388.888	0.00396481		266.484	19.1941		387.48	8.81072		265.607	22.3208		266.561	5.13001
386.287	7.85729		388.27	0.526795		388.015	0.442454		387.25	-0.0120869		389.137	0.00393639		266.651	19.1939		387.73	8.75397		265.772	22.3205		266.727	5.1299
386.536	7.83613		388.52	0.526482		388.265	0.442267		387.5	-0.0120998		389.387	0.0039073		266.818	19.1937		387.98	8.69688		265.938	22.3202		266.894	5.12978
386.787	7.81653		388.769	0.52617		388.514	0.442077		387.75	-0.0121159		389.638	0.00387812		266.985	19.1935		388.229	8.63914		266.105	22.3199		267.058	5.12968
387.037	7.79757		389.019	0.525855		388.764	0.441888		387.999	-0.0121245		389.889	0.00384808		267.152	19.1933		388.478	8.5808		266.272	22.3196		267.225	5.12958
387.288	7.77803		389.268	0.525533		389.014	0.441704		388.249	-0.0121266		390.139	0.00382071		267.318	19.1931		388.728	8.52211		266.439	22.3193		267.391	5.12947
387.539	7.75832		389.518	0.525209		389.263	0.441527		388.499	-0.0121302		390.391	0.00379877		267.485	19.1929		388.977	8.46243		266.605	22.319		267.559	5.12935
387.79	7.73818		389.767	0.524889		389.512	0.44135		388.749	-0.0121531		390.641	0.00377579		267.651	19.1927		389.227	8.40236		266.772	22.3187		267.724	5.12924
388.039	7.71757		390.016	0.524572		389.763	0.441173		388.999	-0.0121695		390.892	0.00374794		267.817	19.1925		389.476	8.34298		266.938	22.3184		267.891	5.12912
388.291	7.69522		390.267	0.524258		390.011	0.440999		389.249	-0.0121983		391.142	0.00371828		267.983	19.1923		389.725	8.28299		267.105	22.3181		268.057	5.12901
388.541	7.67232		390.516	0.523948		390.261	0.440819		389.498	-0.0122099		391.393	0.00368548		268.15	19.1921		389.974	8.22196		267.272	22.3178		268.224	5.1289
388.792	7.65054		390.765	0.523634		390.511	0.440635		389.748	-0.0122146		391.643	0.00365801		268.317	19.1919		390.225	8.15983		267.438	22.3175		268.391	5.12879
389.043	7.6298		391.014	0.523313		390.761	0.440453		389.997	-0.012227		391.895	0.0036334		268.483	19.1917		390.475	8.0975		267.603	22.3171		268.557	5.12868
389.295	7.60983		391.264	0.522993		391.01	0.440273		390.247	-0.0122317		392.146	0.00361271		268.649	19.1915		390.725	8.03494		267.77	22.3168		268.723	5.12857
389.545	7.59071		391.513	0.522667		391.26	0.440095		390.496	-0.012244		392.396	0.00358954		268.815	19.1913		390.974	7.97191		267.936	22.3165		268.89	5.12845
389.797	7.57182		391.762	0.522342		391.509	0.439921		390.746	-0.0122441		392.647	0.00356378		268.982	19.1911		391.224	7.90883		268.102	22.3162		269.056	5.12834
390.047	7.55336		392.013	0.522022		391.759	0.439747		390.996	-0.0122425		392.897	0.00353632		269.149	19.1909		391.474	7.84551		268.269	22.316		269.222	5.12822
390.297	7.53372		392.261	0.521709		392.009	0.439572		391.246	-0.0122189		393.149	0.0035079		269.315	19.1907		391.724	7.78079		268.435	22.3157		269.389	5.12811
390.547	7.51325		392.511	0.5214		392.259	0.439389		391.496	-0.0121807		393.399	0.00347652		269.481	19.1904		391.974	7.71579		268.602	22.3154		269.556	5.12799
390.797	7.49181		392.76	0.521087		392.508	0.439207		391.745	-0.0121566		393.651	0.00344505		269.646	19.1902		392.224	7.65032		268.768	22.3151		269.721	5.12788
391.048	7.46946		393.011	0.520768		392.758	0.439023		391.994	-0.0121545		393.901	0.00341978		269.814	19.19		392.473	7.58465		268.935	22.3148		269.889	5.12777
391.298	7.44991		393.258	0.520446		393.007	0.438844		392.243	-0.0121712		394.151	0.00339756		269.979	19.1898		392.723	7.51852		269.101	22.3145		270.056	5.12765
391.548	7.4319		393.509	0.520125		393.256	0.43867		392.493	-0.0121971		394.403	0.00337515		270.146	19.1896		392.973	7.45191		269.267	22.3142		270.222	5.12754
391.797	7.40873		393.759	0.519805		393.506	0.438496		392.743	-0.0122285		394.654	0.00334635		270.312	19.1894		393.223	7.38485		269.434	22.3139		270.389	5.12742
392.048	7.38659		394.008	0.519491		393.755	0.438323		392.993	-0.0122653		394.904	0.00331793		270.478	19.1892		393.473	7.31719		269.601	22.3136		270.556	5.1273
392.297	7.36717		394.257	0.519177		394.006	0.438145		393.242	-0.0123006		395.155	0.00329533		270.645	19.189		393.723	7.24933		269.767	22.3133		270.723	5.12719
392.546	7.34766		394.507	0.518864		394.255	0.437963		393.492	-0.0123097		395.406	0.00327969		270.811	19.1888		393.972	7.18144		269.933	22.313		270.888	5.12707
392.796	7.32353		394.756	0.518551		394.505	0.437781		393.74	-0.0123173		395.656	0.00326414		270.977	19.1886		394.222	7.11321		270.099	22.3127		271.054	5.12696
393.046	7.29573		395.007	0.518234		394.754	0.437599		393.99	-0.0123114		395.907	0.00325155		271.143	19.1884		394.472	7.04388		270.266	22.3123		271.221	5.12684
393.296	7.26385		395.256	0.51791		395.003	0.43742		394.24	-0.0123178		396.158	0.00323954		271.31	19.1882		394.722	6.97399		270.432	22.312		271.388	5.12672
393.548	7.23605		395.505	0.517585		395.254	0.437245		394.49	-0.0123115		396.408	0.00323095		271.476	19.1879		394.971	6.90407		270.598	22.3117		271.553	5.1266
393.798	7.21192		395.755	0.51726		395.503	0.437072		394.739	-0.0123125		396.658	0.00322599		271.643	19.1877		395.22	6.8338		270.765	22.3114		271.72	5.12648
394.049	7.18879		396.004	0.516943		395.753	0.436896		394.989	-0.0123081		396.908	0.00321875		271.809	19.1875		395.47	6.76316		270.931	22.3111		271.887	5.12636
394.3	7.1608		396.253	0.51663		396.003	0.436719		395.238	-0.0122925		397.158	0.00320654		271.976	19.1873		395.719	6.69169		271.098	22.3108		272.053	5.12625
394.55	7.1293		396.503	0.516316		396.253	0.436539		395.489	-0.012273		397.408	0.00319881		272.142	19.1871		395.969	6.62004		271.264	22.3105		272.22	5.12613
394.801	7.1024		396.751	0.515998		396.502	0.436354		395.738	-0.0122497		397.657	0.00319538		272.308	19.1869		396.22	6.54893		271.43	22.3102		272.387	5.12601
395.051	7.07865		397.001	0.51568		396.753	0.436171		395.988	-0.0122639		397.906	0.00318766		272.475	19.1867		396.469	6.47753		271.596	22.3099		272.553	5.12589
395.303	7.05527		397.25	0.51536		397.002	0.435989		396.238	-0.0122883		398.156	0.00318146		272.642	19.1865		396.719	6.40546		271.763	22.3096		272.721	5.12577
395.552	7.02395		397.499	0.515039		397.251	0.435813		396.488	-0.012312		398.405	0.00317316		272.807	19.1862		396.969	6.33259		271.93	22.3093		272.887	5.12565
395.802	6.99549		397.749	0.51472		397.501	0.435642		396.736	-0.0123147		398.653	0.00316191		272.974	19.186		397.219	6.25964		272.097	22.309		273.053	5.12552
396.054	6.97068		397.998	0.514403		397.752	0.43547		396.986	-0.0123185		398.902	0.00314722		273.14	19.1858		397.468	6.18693		272.263	22.3087		273.22	5.1254
396.302	6.94707		398.248	0.514089		398.002	0.435293		397.236	-0.0123394		399.151	0.00312719		273.307	19.1856		397.718	6.11439		272.429	22.3084		273.387	5.12528
396.552	6.92109		398.499	0.513771		398.251	0.435111		397.486	-0.0123588		399.4	0.00311155		273.473	19.1854		397.968	6.04207		272.596	22.3081		273.554	5.12516
396.803	6.89311		398.748	0.513451		398.501	0.434925		397.736	-0.0123566		399.649	0.00309687		273.64	19.1852		398.218	5.96918		272.762	22.3078		273.721	5.12504
397.052	6.86551		398.997	0.51313		398.75	0.434739		397.985	-0.0123488		399.896	0.00307712		273.806	19.1849		398.467	5.89549		272.928	22.3075		273.887	5.12491
397.302	6.838		399.246	0.512809		398.999	0.434556		398.234	-0.0123437		400.146	0.0030571		273.973	19.1847		398.717	5.82152		273.094	22.3072		274.054	5.12479
397.549	6.81163		399.496	0.512486		399.249	0.434382		398.483	-0.0123506		400.395	0.00303154		274.14	19.1845		398.967	5.74737		273.261	22.3069		274.221	5.12467
397.8	6.78569		399.746	0.512168		399.499	0.434206		398.734	-0.0123701		400.644	0.00300989		274.306	19.1843		399.216	5.67235		273.427	22.3067		274.388	5.12454
398.049	6.76019		399.995	0.511854		399.748	0.434026		398.984	-0.0123859		400.892	0.00300703		274.473	19.184		399.466	5.59833		273.593	22.3064		274.554	5.12442
398.298	6.73472		400.246	0.511541		399.997	0.433839		399.233	-0.0124024		401.141	0.0030201		274.639	19.1838		399.716	5.52417		273.759	22.3061		274.721	5.1243
398.546	6.70885		400.495	0.511223		400.248	0.433653		399.481	-0.0124206		401.389	0.00303259		274.806	19.1836		399.965	5.44972		273.927	22.3058		274.887	5.12418
398.796	6.68624		400.745	0.510905		400.496	0.433468		399.731	-0.0124314		401.638	0.00304098		274.973	19.1834		400.215	5.37484		274.092	22.3055		275.054	5.12405
399.045	6.65926		400.994	0.510581		400.747	0.433284		399.981	-0.0124037		401.888	0.00304193		275.139	19.1832		400.464	5.30018		274.259	22.3052		275.22	5.12393
399.293	6.62606		401.244	0.510254		400.996	0.433103		400.23	-0.01239		402.137	0.00303774		275.306	19.183		400.714	5.22543		274.425	22.3049		275.387	5.12381
399.543	6.59602		401.494	0.509931		401.246	0.432932		400.479	-0.0123666		402.385	0.00303545		275.472	19.1827		400.964	5.15119		274.592	22.3046		275.554	5.12368
399.792	6.56973		401.743	0.509614		401.495	0.432765		400.729	-0.0123433		402.635	0.00304899		275.638	19.1825		401.214	5.07649		274.758	22.3043		275.719	5.12355
400.04	6.53914		401.993	0.509294		401.745	0.432589		400.979	-0.0123565		402.883	0.00307522		275.805	19.1823		401.464	5.00222		274.925	22.3041		275.886	5.12343
400.291	6.51056		402.242	0.508979		401.995	0.43241		401.228	-0.0123707		403.132	0.0031085		275.971	19.1821		401.714	4.92781		275.091	22.3038		276.053	5.12331
400.541	6.48665		402.491	0.508663		402.245	0.432227		401.478	-0.012394		403.381	0.00312634		276.138	19.1819		401.963	4.85292		275.258	22.3035		276.218	5.12318
400.79	6.45655		402.741	0.508342		402.494	0.432045		401.727	-0.0123976		403.629	0.00312939		276.304	19.1816		402.214	4.7781		275.425	22.3032		276.385	5.12306
401.04	6.42726		402.991	0.508021		402.744	0.431863		401.976	-0.0123914		403.878	0.00312958		276.471	19.1814		402.464	4.7035		275.591	22.3029		276.55	5.12293
401.29	6.40012		403.24	0.507695		402.994	0.431684		402.226	-0.0123722		404.127	0.00313511		276.637	19.1812		402.713	4.62981		275.758	22.3026		276.716	5.12279
401.54	6.3732		403.489	0.507372		403.243	0.43151		402.474	-0.0123462		404.376	0.00314703		276.804	19.1809		402.963	4.55552		275.924	22.3023		276.882	5.12266
401.79	6.34763		403.74	0.507045		403.493	0.43134		402.724	-0.0123257		404.625	0.00316381		276.971	19.1807		403.213	4.48108		276.092	22.302		277.048	5.12253
402.04	6.32123		403.989	0.506722		403.743	0.431162		402.973	-0.0123292		404.873	0.00317573		277.137	19.1805		403.463	4.40695		276.257	22.3017		277.214	5.12241
402.29	6.29099		404.239	0.506401		403.992	0.430981		403.224	-0.0123614		405.122	0.00317621		277.303	19.1803		403.712	4.33296		276.424	22.3014		277.38	5.12229
402.54	6.26487		404.489	0.506078		404.242	0.430797		403.473	-0.0123799		405.371	0.00317278		277.469	19.18		403.962	4.25889		276.59	22.3011		277.546	5.12216
402.79	6.24074		404.738	0.505758		404.492	0.430611		403.723	-0.012359		405.621	0.00316868		277.636	19.1798		404.212	4.18526		276.757	22.3008		277.714	5.12203
403.039	6.21579		404.988	0.505431		404.741	0.430428		403.973	-0.0123454		405.871	0.00317965		277.801	19.1796		404.462	4.11226		276.924	22.3005		277.88	5.1219
403.288	6.19063		405.238	0.505102		404.99	0.430252		404.223	-0.0123438		406.12	0.00319433		277.968	19.1793		404.712	4.03918		277.09	22.3001		278.047	5.12177
403.538	6.1641		405.488	0.504771		405.24	0.43008		404.472	-0.0123478		406.369	0.00321426		278.134	19.1791		404.962	3.96671		277.256	22.2998		278.215	5.12164
403.787	6.13478		405.738	0.504446		405.49	0.429905		404.723	-0.012357		406.619	0.00322905		278.301	19.1789		405.212	3.89447		277.423	22.2995		278.381	5.12151
404.037	6.10439		405.988	0.50413		405.74	0.429733		404.972	-0.0123498		406.869	0.00323668		278.467	19.1787		405.463	3.82241		277.589	22.2992		278.548	5.12138
404.287	6.07573		406.236	0.503813		405.99	0.429554		405.222	-0.0123502		407.118	0.00323143		278.633	19.1784		405.713	3.75038		277.755	22.2989		278.715	5.12125
404.535	6.04942		406.486	0.503496		406.239	0.429374		405.471	-0.0123631		407.368	0.00324774		278.799	19.1782		405.963	3.6786		277.922	22.2986		278.881	5.12112
404.785	6.02465		406.734	0.503171		406.49	0.429191		405.721	-0.0123631		407.617	0.00344734		278.966	19.1779		406.212	3.60729		278.088	22.2983		279.048	5.12098
405.036	5.99591		406.983	0.502839		406.739	0.429005		405.971	-0.0123862		407.866	0.00372315		279.133	19.1777		406.463	3.53665		278.255	22.298		279.215	5.12085
405.286	5.96645		407.233	0.502505		406.989	0.428824		406.22	-0.0124128		408.116	0.00383701		279.299	19.1775		406.713	3.46623		278.421	22.2976		279.382	5.12071
405.535	5.93773		407.482	0.502173		407.238	0.428648		406.47	-0.012434		408.366	0.0038744		279.466	19.1772		406.963	3.39614		278.587	22.2973		279.548	5.12057
405.785	5.90963		407.731	0.501845		407.49	0.428479		406.719	-0.0124673		408.615	0.00388088		279.633	19.177		407.214	3.32662		278.753	22.297		279.715	5.12044
406.035	5.88308		407.982	0.50152		407.739	0.428305		406.969	-0.0125024		408.864	0.00387297		279.799	19.1768		407.463	3.25757		278.92	22.2967		279.881	5.12031
406.285	5.85557		408.231	0.5012		407.988	0.428127		407.218	-0.0125395		409.114	0.00385656		279.965	19.1765		407.714	3.18878		279.086	22.2963		280.047	5.12018
406.535	5.82731		408.481	0.500877		408.239	0.42794		407.467	-0.0125559		409.364	0.0038353		280.132	19.1763		407.964	3.12077		279.253	22.296		280.214	5.12005
406.785	5.79919		408.729	0.500552		408.489	0.427752		407.717	-0.0125515		409.613	0.00381737		280.299	19.176		408.214	3.05313		279.419	22.2957		280.38	5.11991
407.035	5.77046		408.979	0.50022		408.739	0.427564		407.967	-0.0125427		409.863	0.00379705		280.465	19.1758		408.464	2.98609		279.587	22.2953		280.547	5.11977
407.284	5.74093		409.229	0.499883		408.988	0.42738		408.217	-0.0125405		410.113	0.00377808		280.63	19.1756		408.715	2.91956		279.753	22.295		280.713	5.11963
407.534	5.71262		409.479	0.499548		409.239	0.427204		408.467	-0.0125442		410.363	0.00376329		280.796	19.1753		408.965	2.85365		279.92	22.2947		280.88	5.11949
407.785	5.68488		409.729	0.499217		409.488	0.427031		408.717	-0.0125314		410.613	0.0037468		280.963	19.1751		409.216	2.78809		280.085	22.2943		281.046	5.11936
408.035	5.65575		409.979	0.498889		409.738	0.426859		408.967	-0.0125227		410.862	0.00372581		281.129	19.1748		409.466	2.72274		280.252	22.294		281.213	5.11923
408.284	5.62744		410.229	0.498564		409.988	0.426682		409.216	-0.012538		411.112	0.00370197		281.295	19.1746		409.716	2.65845		280.418	22.2937		281.378	5.1191
408.534	5.60188		410.48	0.498234		410.237	0.426499		409.467	-0.0125599		411.363	0.00368032		281.46	19.1744		409.967	2.59496		280.584	22.2933		281.545	5.11896
408.783	5.57822		410.73	0.497902		410.487	0.426312		409.715	-0.0125915		411.611	0.00366421		281.627	19.1741		410.216	2.5321		280.75	22.293		281.711	5.11882
409.033	5.55699		410.979	0.497569		410.738	0.426122		409.965	-0.0126161		411.862	0.00364838		281.793	19.1739		410.466	2.46985		280.917	22.2926		281.877	5.11869
409.282	5.52908		411.231	0.497232		410.987	0.425934		410.214	-0.012636		412.111	0.0036396		281.959	19.1736		410.716	2.40799		281.082	22.2923		282.044	5.11855
409.531	5.49503		411.48	0.496896		411.237	0.425751		410.464	-0.012657		412.361	0.00363035		282.126	19.1734		410.967	2.34719		281.25	22.292		282.211	5.11841
409.78	5.46048		411.731	0.496565		411.487	0.425574		410.714	-0.0126755		412.61	0.00361042		282.293	19.1731		411.217	2.28687		281.416	22.2916		282.377	5.11827
410.03	5.43138		411.98	0.496233		411.737	0.425396		410.962	-0.0127052		412.86	0.00358553		282.46	19.1729		411.467	2.22754		281.582	22.2913		282.543	5.11813
410.279	5.40543		412.231	0.495901		411.986	0.425221		411.212	-0.012738		413.11	0.00356312		282.626	19.1726		411.718	2.16896		281.748	22.2909		282.711	5.11799
410.528	5.37786		412.479	0.495566		412.236	0.425042		411.462	-0.0127583		413.359	0.00355148		282.793	19.1724		411.967	2.11128		281.915	22.2906		282.877	5.11785
410.778	5.35203		412.731	0.495229		412.486	0.42486		411.71	-0.0127779		413.609	0.00354185		282.96	19.1721		412.218	2.05424		282.081	22.2903		283.042	5.11771
411.027	5.3273		412.981	0.494885		412.735	0.424676		411.96	-0.0127996		413.858	0.00352955		283.127	19.1719		412.468	1.99785		282.247	22.2899		283.209	5.11757
411.276	5.29925		413.231	0.494539		412.985	0.424493		412.209	-0.0128209		414.106	0.00351582		283.294	19.1716		412.718	1.94236		282.414	22.2896		283.376	5.11743
411.524	5.26081		413.48	0.494202		413.234	0.424312		412.459	-0.0128285		414.356	0.00349331		283.46	19.1714		412.969	1.88751		282.58	22.2892		283.542	5.11729
411.775	5.22723		413.73	0.49387		413.484	0.424135		412.709	-0.0128344		414.606	0.00346603		283.626	19.1711		413.219	1.83367		282.747	22.2889		283.708	5.11715
412.023	5.19548		413.98	0.493542		413.733	0.423957		412.958	-0.0128552		414.855	0.00344286		283.793	19.1709		413.469	1.78082		282.911	22.2885		283.875	5.11702
412.272	5.16519		414.23	0.493214		413.984	0.423778		413.207	-0.0128862		415.105	0.00342579		283.96	19.1706		413.719	1.7287		283.079	22.2882		284.041	5.11688
412.522	5.13712		414.48	0.492881		414.233	0.423592		413.457	-0.0129142		415.355	0.00340738		284.127	19.1704		413.969	1.67735		283.245	22.2878		284.207	5.11674
412.772	5.10926		414.729	0.492542		414.484	0.423402		413.707	-0.0129219		415.604	0.00339069		284.293	19.1701		414.219	1.62689		283.411	22.2874		284.375	5.11662
413.022	5.08096		414.979	0.492196		414.733	0.423215		413.956	-0.0128913		415.853	0.00337181		284.46	19.1699		414.469	1.57724		283.577	22.2871		284.541	5.11647
413.271	5.05241		415.228	0.491847		414.983	0.423029		414.206	-0.0128752		416.105	0.00335102		284.626	19.1696		414.719	1.52861		283.744	22.2867		284.707	5.11631
413.522	5.02481		415.478	0.491499		415.233	0.422851		414.456	-0.0128754		416.354	0.00332699		284.793	19.1694		414.97	1.48098		283.911	22.2863		284.873	5.11616
413.772	4.99653		415.728	0.491157		415.483	0.422675		414.704	-0.0128966		416.604	0.00330029		284.961	19.1691		415.221	1.4343		284.077	22.286		285.04	5.11601
414.023	4.9709		415.978	0.490819		415.733	0.422502		414.955	-0.0129231		416.854	0.00327692		285.127	19.1689		415.47	1.38862		284.244	22.2856		285.206	5.11587
414.272	4.94282		416.228	0.490481		415.983	0.42232		415.205	-0.012923		417.104	0.00325747		285.293	19.1686		415.72	1.3439		284.41	22.2853		285.372	5.11573
414.522	4.91188		416.478	0.490142		416.233	0.422133		415.454	-0.0128991		417.354	0.0032445		285.459	19.1683		415.97	1.29987		284.577	22.2849		285.538	5.11559
414.773	4.88124		416.727	0.489801		416.482	0.42194		415.704	-0.0128742		417.603	0.00323439		285.625	19.1681		416.221	1.25694		284.743	22.2845		285.705	5.11545
415.022	4.85341		416.977	0.489457		416.733	0.421747		415.954	-0.0128638		417.852	0.0032198		285.792	19.1678		416.47	1.21499		284.91	22.2842		285.871	5.1153
415.273	4.8219		417.227	0.489107		416.982	0.421557		416.204	-0.0128746		418.102	0.00320139		285.959	19.1676		416.72	1.17401		285.076	22.2838		286.039	5.11515
415.524	4.78475		417.477	0.488758		417.232	0.421366		416.453	-0.012894		418.351	0.0031764		286.125	19.1673		416.971	1.13391		285.242	22.2834		286.204	5.11501
415.775	4.74973		417.726	0.488409		417.482	0.421181		416.703	-0.0128729		418.6	0.00315657		286.291	19.1671		417.22	1.09502		285.409	22.283		286.37	5.11486
416.026	4.71545		417.977	0.488068		417.731	0.421004		416.953	-0.0128525		418.85	0.00314045		286.459	19.1668		417.471	1.05706		285.575	22.2827		286.537	5.11471
416.276	4.68282		418.226	0.487727		417.981	0.420828		417.203	-0.0128202		419.099	0.00312347		286.625	19.1665		417.721	1.01992		285.742	22.2823		286.704	5.11457
416.528	4.65189		418.476	0.487384		418.231	0.420643		417.453	-0.0127897		419.348	0.00311212		286.791	19.1663		417.971	0.983804		285.909	22.2819		286.87	5.11443
416.779	4.6158		418.726	0.487039		418.481	0.420453		417.702	-0.0127609		419.598	0.00309935		286.958	19.166		418.221	0.948514		286.075	22.2815		287.036	5.11428
417.03	4.58251		418.976	0.486684		418.731	0.420258		417.951	-0.0127423		419.848	0.00308228		287.124	19.1657		418.471	0.914556		286.241	22.2812		287.203	5.11412
417.282	4.55416		419.226	0.486323		418.98	0.420057		418.201	-0.0127126		420.097	0.00305853		287.29	19.1655		418.722	0.881445		286.408	22.2808		287.368	5.11397
417.532	4.51889		419.475	0.485949		419.23	0.419856		418.451	-0.0127033		420.347	0.00303497		287.457	19.1652		418.972	0.849334		286.574	22.2804		287.535	5.11383
417.783	4.47741		419.725	0.485566		419.481	0.419659		418.701	-0.0127053		420.597	0.00301895		287.624	19.165		419.221	0.818163		286.741	22.28		287.7	5.11368
418.035	4.44009		419.977	0.48519		419.73	0.419473		418.95	-0.0127168		420.847	0.00301008		287.791	19.1647		419.471	0.787551		286.908	22.2796		287.867	5.11354
418.285	4.40533		420.226	0.484814		419.979	0.419283		419.2	-0.0127284		421.097	0.00300331		287.957	19.1644		419.721	0.757958		287.074	22.2793		288.034	5.11339
418.536	4.37256		420.477	0.484429		420.229	0.419096		419.45	-0.0127479		421.346	0.00299387		288.123	19.1642		419.971	0.729387		287.241	22.2789		288.2	5.11324
418.786	4.34082		420.727	0.484036		420.479	0.418906		419.699	-0.0127784		421.596	0.0029767		288.29	19.1639		420.22	0.701822		287.407	22.2785		288.367	5.11309
419.037	4.30861		420.977	0.48364		420.729	0.418712		419.948	-0.0127863		421.846	0.00295582		288.456	19.1636		420.471	0.675124		287.574	22.2781		288.533	5.11294
419.287	4.28009		421.227	0.483239		420.979	0.418517		420.198	-0.0127935		422.095	0.00293207		288.623	19.1634		420.721	0.649372		287.739	22.2777		288.7	5.11278
419.537	4.25402		421.476	0.482838		421.228	0.418322		420.447	-0.0128033		422.346	0.00290785		288.788	19.1631		420.971	0.624321		287.906	22.2773		288.866	5.11263
419.787	4.21457		421.726	0.482441		421.479	0.418131		420.697	-0.0128241		422.595	0.00288973		288.955	19.1628		421.22	0.600109		288.072	22.2768		289.032	5.11248
420.036	4.17944		421.977	0.482046		421.73	0.417942		420.947	-0.0128452		422.844	0.00287733		289.122	19.1626		421.469	0.576791		288.239	22.2764		289.199	5.11234
420.286	4.14957		422.226	0.481653		421.979	0.417749		421.196	-0.0128724		423.094	0.00286856		289.287	19.1623		421.719	0.554177		288.406	22.276		289.365	5.11219
420.535	4.11723		422.476	0.481261		422.229	0.417553		421.446	-0.012889		423.343	0.00285253		289.454	19.162		421.97	0.532411		288.572	22.2756		289.531	5.11203
420.784	4.087		422.726	0.480863		422.48	0.417356		421.696	-0.0128905		423.592	0.00283461		289.62	19.1618		422.218	0.511493		288.738	22.2751		289.697	5.11187
421.033	4.05581		422.975	0.480459		422.73	0.417154		421.945	-0.0128856		423.841	0.0028142		289.787	19.1615		422.468	0.491521		288.905	22.2747		289.864	5.11171
421.282	4.02048		423.225	0.480047		422.979	0.41695		422.195	-0.0128952		424.09	0.00279608		289.953	19.1612		422.718	0.472169		289.072	22.2743		290.029	5.11156
421.532	3.9913		423.474	0.479633		423.229	0.416747		422.444	-0.0128971		424.34	0.00278044		290.119	19.161		422.967	0.453403		289.238	22.2738		290.196	5.11141
421.782	3.96957		423.724	0.47923		423.479	0.416553		422.694	-0.0129145		424.589	0.00277185		290.285	19.1607		423.217	0.435268		289.406	22.2734		290.363	5.11126
422.031	3.94031		423.974	0.478827		423.729	0.416358		422.943	-0.0129387		424.839	0.00276384		290.452	19.1604		423.467	0.41779		289.572	22.273		290.53	5.1111
422.28	3.90925		424.222	0.478425		423.978	0.416165		423.193	-0.0129635		425.089	0.00274944		290.619	19.1601		423.716	0.401293		289.738	22.2726		290.696	5.11095
422.529	3.89081		424.472	0.478023		424.229	0.415965		423.443	-0.0129963		425.339	0.00273418		290.786	19.1598		423.965	0.385509		289.904	22.2721		290.862	5.11079
422.777	3.87696		424.722	0.477615		424.479	0.415761		423.692	-0.0130231		425.589	0.00271816		290.953	19.1596		424.215	0.370171		290.071	22.2717		291.029	5.11064
423.027	3.83839		424.971	0.477207		424.728	0.415552		423.941	-0.0130221		425.838	0.00270004		291.119	19.1593		424.464	0.355615		290.237	22.2713		291.196	5.11048
423.275	3.79045		425.22	0.476799		424.979	0.415342		424.191	-0.0130147		426.088	0.00268536		291.285	19.159		424.714	0.341382		290.403	22.2709		291.361	5.11033
423.523	3.75262		425.47	0.476391		425.229	0.415132		424.44	-0.0130303		426.338	0.00267162		291.452	19.1587		424.962	0.327655		290.57	22.2705		291.528	5.11018
423.773	3.7184		425.719	0.475988		425.478	0.414932		424.69	-0.0130403		426.588	0.00266485		291.618	19.1585		425.212	0.314629		290.736	22.27		291.694	5.11003
424.022	3.68614		425.97	0.475586		425.728	0.414733		424.939	-0.013058		426.837	0.00265503		291.785	19.1582		425.461	0.302157		290.903	22.2696		291.861	5.10987
424.272	3.65512		426.219	0.475186		425.978	0.414531		425.189	-0.0130679		427.087	0.00263853		291.951	19.1579		425.71	0.29034		291.069	22.2692		292.027	5.10971
424.522	3.62416		426.469	0.474783		426.227	0.41433		425.438	-0.0130594		427.337	0.00262308		292.118	19.1576		425.96	0.279042		291.236	22.2688		292.194	5.10955
424.772	3.59174		426.719	0.474377		426.476	0.414125		425.687	-0.0130446		427.587	0.00260591		292.285	19.1573		426.208	0.268284		291.402	22.2683		292.361	5.10939
425.022	3.56068		426.969	0.473964		426.726	0.413914		425.937	-0.0130617		427.836	0.00258999		292.45	19.157		426.458	0.25764		291.569	22.2679		292.528	5.10922
425.272	3.53014		427.219	0.473555		426.976	0.413701		426.186	-0.013096		428.086	0.00257873		292.617	19.1568		426.706	0.247714		291.735	22.2675		292.694	5.10907
425.522	3.49899		427.469	0.473143		427.226	0.413492		426.436	-0.0131237		428.334	0.00256662		292.783	19.1565		426.956	0.238031		291.902	22.2671		292.86	5.10892
425.772	3.46891		427.719	0.472734		427.475	0.413283		426.686	-0.0131392		428.584	0.00255785		292.949	19.1562		427.205	0.228832		292.068	22.2666		293.027	5.10876
426.022	3.43955		427.969	0.472328		427.725	0.413072		426.935	-0.013154		428.834	0.00254393		293.115	19.1559		427.454	0.220192		292.235	22.2662		293.193	5.10862
426.273	3.40848		428.219	0.471923		427.975	0.412866		427.185	-0.0131759		429.084	0.00253248		293.282	19.1556		427.703	0.212171		292.401	22.2658		293.36	5.10846
426.521	3.37748		428.469	0.471516		428.225	0.412664		427.434	-0.0131883		429.333	0.00251608		293.447	19.1553		427.952	0.204257		292.568	22.2654		293.527	5.1083
426.772	3.34742		428.719	0.471105		428.474	0.412457		427.684	-0.0131977		429.583	0.00249739		293.614	19.155		428.201	0.196714		292.734	22.265		293.693	5.10813
427.022	3.31603		428.969	0.470688		428.724	0.412247		427.933	-0.0132004		429.833	0.00248137		293.78	19.1547		428.45	0.189376		292.901	22.2646		293.86	5.10797
427.272	3.28423		429.219	0.470267		428.974	0.412033		428.183	-0.0132039		430.082	0.00247269		293.947	19.1544		428.7	0.182346		293.068	22.2641		294.026	5.10781
427.522	3.25401		429.468	0.469849		429.224	0.411818		428.432	-0.0132018		430.333	0.00246258		294.113	19.1541		428.949	0.175722		293.234	22.2637		294.193	5.10765
427.772	3.22276		429.718	0.469439		429.474	0.411603		428.683	-0.0131978		430.581	0.00245666		294.279	19.1538		429.198	0.169591		293.402	22.2633		294.36	5.10749
428.023	3.19152		429.968	0.469031		429.724	0.411386		428.932	-0.0132028		430.831	0.00244417		294.446	19.1535		429.447	0.163608		293.567	22.2629		294.526	5.10733
428.273	3.16136		430.216	0.468623		429.974	0.411177		429.182	-0.0132019		431.08	0.00242577		294.612	19.1532		429.696	0.157938		293.734	22.2625		294.692	5.10717
428.523	3.13038		430.466	0.468211		430.224	0.41097		429.432	-0.0131983		431.329	0.00241156		294.778	19.1529		429.945	0.152466		293.9	22.262		294.859	5.107
428.775	3.09868		430.716	0.467801		430.475	0.410755		429.68	-0.0132032		431.579	0.00239887		294.944	19.1527		430.195	0.147129		294.066	22.2616		295.025	5.10684
429.024	3.06836		430.966	0.467386		430.723	0.41054		429.93	-0.0131993		431.829	0.00238857		295.111	19.1524		430.443	0.141948		294.233	22.2611		295.192	5.10667
429.275	3.0377		431.215	0.466967		430.974	0.41032		430.18	-0.0132027		432.078	0.0023778		295.276	19.1521		430.693	0.137118		294.399	22.2607		295.359	5.10651
429.525	3.00634		431.465	0.466548		431.224	0.410101		430.43	-0.0132206		432.327	0.00236263		295.443	19.1518		430.941	0.132587		294.566	22.2602		295.525	5.10636
429.775	2.97563		431.714	0.466134		431.474	0.409882		430.679	-0.0132377		432.577	0.00234308		295.61	19.1515		431.19	0.128259		294.732	22.2598		295.691	5.10619
430.027	2.94515		431.964	0.46572		431.724	0.409667		430.928	-0.0132687		432.826	0.00232554		295.777	19.1512		431.438	0.124102		294.899	22.2593		295.858	5.10603
430.276	2.91361		432.213	0.465312		431.974	0.409456		431.177	-0.0133009		433.076	0.00230389		295.943	19.1509		431.688	0.120168		295.064	22.2589		296.024	5.10586
430.526	2.8825		432.463	0.464898		432.223	0.409245		431.426	-0.0133251		433.325	0.00228558		296.11	19.1506		431.937	0.116255		295.231	22.2584		296.192	5.1057
430.777	2.85161		432.712	0.464483		432.473	0.409031		431.676	-0.0133468		433.575	0.00227032		296.276	19.1503		432.185	0.112407		295.397	22.258		296.357	5.10553
431.027	2.82042		432.962	0.464063		432.722	0.40881		431.925	-0.0133688		433.825	0.00225925		296.443	19.15		432.434	0.108837		295.564	22.2575		296.524	5.10536
431.277	2.78935		433.212	0.463639		432.973	0.408589		432.175	-0.0133904		434.074	0.00224352		296.609	19.1497		432.683	0.105503		295.73	22.257		296.69	5.1052
431.528	2.75848		433.461	0.463219		433.223	0.408368		432.425	-0.0133904		434.324	0.00222349		296.776	19.1494		432.932	0.102375		295.896	22.2566		296.857	5.10503
431.777	2.72725		433.712	0.462804		433.471	0.408147		432.674	-0.0133933		434.573	0.00220013		296.942	19.1491		433.181	0.0992959		296.062	22.2561		297.023	5.10487
432.028	2.69566		433.961	0.462393		433.722	0.407925		432.924	-0.0134026		434.823	0.00218191		297.109	19.1488		433.43	0.0963405		296.23	22.2557		297.189	5.10471
432.279	2.66495		434.211	0.461983		433.972	0.407705		433.173	-0.013405		435.072	0.00216322		297.275	19.1485		433.679	0.0933504		296.396	22.2552		297.356	5.10454
432.528	2.63437		434.461	0.461564		434.221	0.407484		433.422	-0.0133694		435.322	0.0021472		297.441	19.1482		433.928	0.0906168		296.562	22.2548		297.523	5.10437
432.778	2.60317		434.71	0.46114		434.471	0.40727		433.672	-0.013292		435.572	0.00213728		297.608	19.1479		434.177	0.0877863		296.729	22.2543		297.688	5.10419
433.029	2.57301		434.96	0.460713		434.721	0.407052		433.921	-0.0132516		435.821	0.00212803		297.774	19.1476		434.427	0.0852234		296.896	22.2538		297.856	5.10403
433.279	2.54329		435.21	0.460288		434.971	0.406827		434.171	-0.01324		436.07	0.00211477		297.94	19.1473		434.675	0.0828095		297.063	22.2534		298.022	5.10386
433.528	2.51292		435.459	0.459864		435.221	0.4066		434.421	-0.0132513		436.319	0.00209703		298.107	19.147		434.924	0.0805412		297.229	22.2529		298.188	5.10369
433.778	2.48272		435.71	0.459445		435.471	0.406371		434.67	-0.0132647		436.569	0.00207653		298.273	19.1467		435.173	0.0784277		297.397	22.2524		298.354	5.10352
434.028	2.4533		435.959	0.459029		435.721	0.406148		434.919	-0.0132575		436.819	0.0020545		298.439	19.1464		435.422	0.0762071		297.564	22.252		298.52	5.10335
434.278	2.42158		436.209	0.458614		435.971	0.405928		435.169	-0.0132511		437.069	0.00204096		298.606	19.1461		435.672	0.0740438		297.73	22.2515		298.686	5.10318
434.527	2.38929		436.458	0.458195		436.221	0.405707		435.419	-0.0132576		437.318	0.00202971		298.772	19.1458		435.921	0.0719567		297.896	22.2511		298.852	5.10301
434.777	2.35915		436.708	0.457769		436.471	0.405483		435.668	-0.0132775		437.567	0.00201626		298.938	19.1455		436.171	0.0699086		298.062	22.2506		299.018	5.10284
435.027	2.329		436.958	0.457334		436.721	0.405258		435.918	-0.0133072		437.817	0.00200071		299.105	19.1451		436.419	0.0679973		298.229	22.2501		299.185	5.10267
435.276	2.29926		437.206	0.456899		436.972	0.405029		436.168	-0.0133337		438.067	0.00197992		299.271	19.1448		436.669	0.066207		298.396	22.2497		299.352	5.1025
435.526	2.27075		437.457	0.456468		437.221	0.404797		436.418	-0.0133499		438.316	0.00195713		299.437	19.1445		436.918	0.0644908		298.561	22.2492		299.518	5.10234
435.775	2.24194		437.706	0.456039		437.471	0.404566		436.667	-0.0133731		438.567	0.00193758		299.604	19.1442		437.168	0.0628339		298.729	22.2488		299.685	5.10216
436.026	2.2133		437.955	0.455611		437.721	0.404334		436.917	-0.0134079		438.817	0.00192175		299.77	19.1439		437.417	0.0611612		298.895	22.2483		299.851	5.10199
436.274	2.18544		438.205	0.455187		437.971	0.404102		437.166	-0.0134392		439.066	0.0019063		299.937	19.1436		437.666	0.0595527		299.061	22.2479		300.018	5.10182
436.523	2.15803		438.454	0.454755		438.221	0.403871		437.416	-0.0134665		439.315	0.00189219		300.103	19.1433		437.916	0.0580115		299.228	22.2474		300.183	5.10164
436.772	2.13046		438.703	0.454319		438.47	0.40364		437.667	-0.0134864		439.564	0.00187674		300.27	19.1429		438.165	0.0565427		299.394	22.2469		300.35	5.10147
437.021	2.10377		438.953	0.453878		438.721	0.403409		437.915	-0.0135		439.813	0.00185757		300.437	19.1426		438.415	0.0551312		299.559	22.2465		300.517	5.1013
437.27	2.07739		439.203	0.453444		438.97	0.40317		438.166	-0.013516		440.062	0.00183439		300.604	19.1423		438.664	0.0536993		299.727	22.246		300.682	5.10113
437.518	2.05085		439.453	0.453012		439.22	0.402924		438.415	-0.0135299		440.312	0.00181293		300.77	19.142		438.913	0.0522955		299.893	22.2455		300.849	5.10096
437.767	2.02475		439.703	0.452584		439.469	0.402684		438.665	-0.013544		440.56	0.00179682		300.936	19.1417		439.163	0.0509254		300.059	22.2451		301.015	5.1008
438.016	1.99936		439.953	0.452156		439.72	0.402447		438.914	-0.013563		440.809	0.00178471		301.103	19.1413		439.412	0.0496038		300.225	22.2446		301.182	5.10063
438.264	1.97373		440.203	0.451726		439.969	0.40221		439.163	-0.0135874		441.059	0.00177164		301.268	19.141		439.662	0.0483556		300.392	22.2441		301.348	5.10046
438.513	1.94864		440.453	0.451292		440.218	0.401976		439.413	-0.0136037		441.308	0.00175657		301.435	19.1407		439.912	0.0471999		300.558	22.2437		301.515	5.10029
438.762	1.92439		440.702	0.450854		440.469	0.401741		439.662	-0.0136225		441.558	0.00174456		301.601	19.1404		440.161	0.0461399		300.726	22.2432		301.68	5.10011
439.01	1.90021		440.952	0.45041		440.718	0.401503		439.912	-0.0136334		441.807	0.00172853		301.769	19.1401		440.409	0.0451323		300.892	22.2427		301.847	5.09994
439.258	1.87613		441.202	0.449965		440.968	0.401261		440.161	-0.0136495		442.058	0.00170908		301.934	19.1397		440.659	0.0441371		301.058	22.2422		302.015	5.09976
439.508	1.85253		441.451	0.449523		441.219	0.401013		440.41	-0.0136743		442.307	0.00169048		302.101	19.1394		440.91	0.043076		301.224	22.2417		302.18	5.09959
439.757	1.82895		441.701	0.449086		441.468	0.400764		440.659	-0.0136694		442.557	0.00167646		302.267	19.1391		441.159	0.0420711		301.391	22.2413		302.347	5.09941
440.006	1.80579		441.951	0.448652		441.717	0.400522		440.909	-0.0136572		442.806	0.00166531		302.433	19.1388		441.408	0.0411423		301.557	22.2408		302.513	5.09924
440.255	1.78312		442.201	0.44821		441.967	0.400281		441.158	-0.0136446		443.056	0.00165243		302.601	19.1384		441.658	0.0402551		301.723	22.2404		302.679	5.09907
440.504	1.76115		442.45	0.447767		442.217	0.400042		441.409	-0.013666		443.305	0.00163794		302.767	19.1381		441.908	0.0394593		301.89	22.2399		302.846	5.09889
440.752	1.73914		442.701	0.447314		442.466	0.3998		441.658	-0.0136935		443.555	0.00161514		302.933	19.1378		442.157	0.0386428		302.057	22.2394		303.012	5.09871
441.001	1.71768		442.95	0.446855		442.715	0.399556		441.907	-0.0137087		443.804	0.00158911		303.1	19.1374		442.407	0.0378095		302.223	22.2389		303.178	5.09854
441.25	1.69672		443.2	0.446397		442.965	0.399304		442.157	-0.0136916		444.054	0.00156507		303.266	19.1371		442.656	0.0369609		302.389	22.2384		303.344	5.09837
441.5	1.6758		443.449	0.445945		443.214	0.39905		442.407	-0.0136578		444.303	0.00154467		303.432	19.1368		442.906	0.0361353		302.556	22.2379		303.511	5.09819
441.749	1.65505		443.699	0.445494		443.463	0.398795		442.657	-0.0136441		444.553	0.00152807		303.599	19.1364		443.155	0.035352		302.721	22.2374		303.676	5.09802
441.997	1.63538		443.949	0.445047		443.714	0.398542		442.906	-0.0136481		444.803	0.0015173		303.764	19.1361		443.405	0.0346395		302.888	22.2369		303.844	5.09784
442.247	1.61539		444.199	0.444595		443.963	0.398294		443.156	-0.0136543		445.052	0.00150175		303.931	19.1358		443.654	0.0339686		303.055	22.2365		304.01	5.09765
442.496	1.59594		444.448	0.444138		444.213	0.398049		443.406	-0.0136662		445.301	0.00148411		304.098	19.1354		443.904	0.0333462		303.221	22.236		304.176	5.09747
442.745	1.57736		444.698	0.443679		444.463	0.397807		443.654	-0.0136774		445.552	0.00145502		304.264	19.1351		444.153	0.0327058		303.387	22.2355		304.343	5.0973
442.994	1.5591		444.948	0.44322		444.713	0.39756		443.903	-0.0136589		445.802	0.0014308		304.431	19.1347		444.403	0.0320682		303.553	22.2349		304.509	5.09712
443.243	1.54075		445.197	0.442756		444.963	0.397311		444.153	-0.0136258		446.051	0.00140839		304.598	19.1344		444.651	0.0314129		303.72	22.2344		304.676	5.09695
443.493	1.52308		445.448	0.442294		445.212	0.397058		444.401	-0.0136319		446.3	0.00139255		304.764	19.1341		444.901	0.0307543		303.887	22.2339		304.842	5.09677
443.741	1.50555		445.697	0.441838		445.462	0.3968		444.651	-0.0136399		446.549	0.00138063		304.93	19.1337		445.15	0.0300934		304.053	22.2334		305.009	5.0966
443.99	1.48832		445.947	0.441383		445.711	0.396546		444.901	-0.0136375		446.799	0.00136194		305.096	19.1334		445.401	0.0294277		304.22	22.2329		305.175	5.09641
444.24	1.47168		446.197	0.440926		445.961	0.396295		445.15	-0.0136212		447.048	0.00134125		305.263	19.133		445.65	0.0287581		304.387	22.2324		305.342	5.09623
444.488	1.45561		446.446	0.440467		446.211	0.396045		445.4	-0.013623		447.298	0.00132008		305.429	19.1327		445.9	0.0280821		304.553	22.2319		305.509	5.09604
444.737	1.43951		446.697	0.440003		446.461	0.395794		445.65	-0.0136358		447.547	0.00129776		305.596	19.1323		446.149	0.0274021		304.719	22.2313		305.675	5.09586
444.986	1.42414		446.946	0.43954		446.711	0.395544		445.9	-0.0136528		447.797	0.00127869		305.762	19.132		446.399	0.0267178		304.885	22.2308		305.841	5.09567
445.235	1.40902		447.196	0.439078		446.961	0.395291		446.149	-0.0136671		448.046	0.00126257		305.929	19.1317		446.647	0.0260337		305.051	22.2302		306.008	5.09549
445.484	1.39404		447.445	0.43862		447.211	0.395034		446.398	-0.0136856					306.094	19.1313		446.897	0.0253488		305.218	22.2297		306.175	5.09531
445.733	1.3793		447.696	0.438167		447.461	0.394774		446.647	-0.0136896					306.261	19.131		447.147	0.0246694		305.385	22.2292		306.34	5.09513
445.981	1.3653		447.946	0.437709		447.711	0.394516		446.897	-0.0136949					306.428	19.1306		447.396	0.0239918		305.551	22.2287		306.507	5.09494
446.231	1.3515		448.195	0.437243		447.961	0.394264		447.147	-0.0137108					306.595	19.1303		447.645	0.0233169		305.717	22.2282		306.673	5.09476
446.48	1.33821		448.445	0.436777		448.211	0.394013		447.397	-0.0137383					306.761	19.1299		447.894	0.0226404		305.884	22.2277		306.84	5.09458
446.729	1.32517		448.696	0.436308		448.461	0.39376		447.646	-0.013747					306.928	19.1296		448.143	0.0219614		306.05	22.2271		307.007	5.09439
446.978	1.31207		448.945	0.435833		448.71	0.393507		447.895	-0.0137301					307.094	19.1292					306.216	22.2266		307.173	5.09421
447.227	1.29931		449.195	0.435361		448.961	0.39325		448.145	-0.0137022					307.261	19.1288					306.383	22.226		307.34	5.09403
447.477	1.28706		449.445	0.434895		449.21	0.392986		448.394	-0.0136829					307.428	19.1285					306.549	22.2255		307.506	5.09385
447.725	1.27521		449.695	0.434432		449.461	0.392726		448.644	-0.0136864					307.593	19.1281					306.715	22.2249		307.672	5.09366
447.974	1.26348		449.945	0.433974		449.711	0.392468		448.893	-0.0136848					307.76	19.1278					306.882	22.2244		307.839	5.09348
448.224	1.2522		450.195	0.433511		449.961	0.392207		449.142	-0.0136838					307.926	19.1274					307.048	22.2238		308.005	5.09329
448.473	1.24159		450.445	0.433043		450.211	0.39195		449.392	-0.0137007					308.092	19.1271					307.215	22.2233		308.172	5.09311
448.722	1.23109		450.694	0.432566		450.461	0.391698		449.642	-0.0137324					308.259	19.1267					307.381	22.2227		308.339	5.09293
448.972	1.22079		450.943	0.432086		450.711	0.39144		449.891	-0.0137567					308.425	19.1263					307.546	22.2221		308.504	5.09275
449.221	1.21096		451.193	0.431611		450.961	0.391177		450.141	-0.0137783					308.592	19.126					307.713	22.2216		308.671	5.09257
449.47	1.20114		451.442	0.431134		451.211	0.39091		450.39	-0.0138068					308.758	19.1256					307.879	22.221		308.837	5.09238
449.719	1.19155		451.692	0.43066		451.461	0.390639		450.64	-0.0138266					308.924	19.1252					308.046	22.2204		309.004	5.0922
449.969	1.18269		451.942	0.430182		451.712	0.390371		450.889	-0.0138448					309.091	19.1248					308.212	22.2199		309.17	5.09202
450.218	1.17386		452.192	0.429695		451.962	0.390109		451.139	-0.0138629					309.257	19.1245					308.378	22.2193		309.337	5.09183
450.467	1.16533		452.442	0.429208		452.211	0.38985		451.389	-0.0138986					309.422	19.1241					308.545	22.2187		309.504	5.09165
450.716	1.1571		452.691	0.428725		452.461	0.389589		451.638	-0.0139332					309.589	19.1237					308.711	22.2182		309.671	5.09146
450.966	1.14908		452.941	0.428237		452.711	0.389327		451.888	-0.013944					309.755	19.1234					308.877	22.2176		309.836	5.09128
451.215	1.14102		453.191	0.427755		452.96	0.389059		452.137	-0.0139473					309.921	19.123					309.045	22.217		310.003	5.09109
451.465	1.13338		453.438	0.427275		453.211	0.388791		452.386	-0.013958					310.088	19.1226					309.211	22.2164		310.17	5.09091
451.715	1.12585		453.688	0.426787		453.461	0.38852		452.636	-0.0139707					310.254	19.1222					309.378	22.2159		310.336	5.09072
451.964	1.11851		453.938	0.426301		453.71	0.388246		452.886	-0.0139796					310.42	19.1218					309.544	22.2153		310.502	5.09053
452.214	1.11141		454.188	0.425811		453.96	0.387977		453.135	-0.014003					310.586	19.1214					309.711	22.2147		310.669	5.09034
452.463	1.10466		454.436	0.425315		454.21	0.387713		453.385	-0.0140212					310.753	19.1211					309.877	22.2141		310.836	5.09015
452.713	1.0978		454.686	0.424818		454.459	0.38745		453.635	-0.0140436					310.919	19.1207					310.044	22.2135		311.002	5.08996
452.964	1.0912		454.935	0.42432		454.709	0.387185		453.884	-0.0140662					311.085	19.1203					310.211	22.213		311.169	5.08977
453.214	1.08482		455.184	0.423828		454.959	0.386911		454.134	-0.0140908					311.252	19.1199					310.376	22.2124		311.335	5.08958
453.464	1.07822		455.434	0.423337		455.208	0.386635		454.384	-0.014118					311.418	19.1195					310.543	22.2118		311.501	5.0894
453.714	1.07205		455.683	0.422852		455.458	0.386357		454.633	-0.0141376					311.584	19.1191					310.709	22.2112		311.667	5.08921
453.964	1.06643		455.932	0.42236		455.708	0.386083		454.883	-0.0141578					311.751	19.1187					310.876	22.2106		311.833	5.08901
454.214	1.06074		456.182	0.421872		455.958	0.385809		455.132	-0.0141729					311.917	19.1184					311.043	22.21		311.999	5.08882
454.464	1.05491		456.433	0.421373		456.209	0.385542		455.382	-0.0141592					312.084	19.118					311.21	22.2094		312.166	5.08863
454.714	1.04978		456.682	0.420876		456.459	0.385273		455.632	-0.0141542					312.251	19.1176					311.377	22.2088		312.332	5.08844
454.964	1.04438		456.931	0.420376		456.708	0.384997		455.881	-0.0141723					312.416	19.1172					311.543	22.2082		312.498	5.08825
455.212	1.03918		457.181	0.419873		456.959	0.384719		456.13	-0.0141979					312.583	19.1168					311.709	22.2076		312.665	5.08806
455.462	1.03401		457.431	0.419377		457.208	0.38444		456.379	-0.0142172					312.75	19.1164					311.876	22.207		312.831	5.08787
455.712	1.02907		457.68	0.418878		457.458	0.38416		456.628	-0.0142377					312.917	19.116					312.043	22.2064		312.997	5.08767
455.961	1.02425		457.93	0.418379		457.708	0.383882		456.877	-0.014257					313.083	19.1156					312.209	22.2058		313.164	5.08747
456.21	1.01985		458.179	0.417875		457.958	0.383604		457.127	-0.0142653					313.249	19.1152					312.375	22.2052		313.331	5.08728
456.459	1.01551		458.429	0.417369		458.208	0.383328		457.377	-0.0142753					313.416	19.1148					312.542	22.2046		313.497	5.08708
456.709	1.01101		458.679	0.416861		458.458	0.383052		457.626	-0.0142846					313.583	19.1143					312.708	22.204		313.663	5.08689
456.958	1.00627		458.928	0.416357		458.708	0.382774		457.875	-0.0143053					313.749	19.1139					312.874	22.2034		313.829	5.0867
457.207	1.00137		459.179	0.415855		458.958	0.382492		458.125	-0.0143321					313.916	19.1135					313.041	22.2028		313.996	5.08651
457.458	0.996523		459.428	0.415356		459.207	0.38221		458.374	-0.0143604					314.083	19.1131					313.207	22.2021		314.163	5.08632
457.709	0.991899		459.678	0.414853		459.457	0.381925		458.624	-0.0143574					314.249	19.1127					313.373	22.2015		314.329	5.08613
457.96	0.98753		459.928	0.414345		459.708	0.381641		458.874	-0.0143455					314.416	19.1123					313.54	22.2009		314.496	5.08593
458.21	0.983403		460.177	0.413834		459.957	0.381358		459.124	-0.0143474					314.583	19.1118					313.706	22.2003		314.663	5.08573
458.462	0.979419		460.427	0.413318		460.206	0.381079		459.373	-0.0143416					314.75	19.1114					313.872	22.1996		314.829	5.08554
458.712	0.97547		460.677	0.412799		460.455	0.380801		459.623	-0.0143539					314.915	19.111					314.038	22.199		314.995	5.08534
458.962	0.971541		460.927	0.412283		460.705	0.380515		459.872	-0.0143769					315.083	19.1105					314.205	22.1984		315.161	5.08515
459.213	0.967594		461.176	0.411773		460.954	0.380225		460.122	-0.0144066					315.249	19.1101					314.372	22.1978		315.327	5.08495
459.463	0.963812		461.426	0.411264		461.203	0.379932		460.371	-0.0144341					315.415	19.1097					314.537	22.1971		315.494	5.08476
459.712	0.960147		461.676	0.410753		461.453	0.379636		460.62	-0.0144578					315.582	19.1092					314.704	22.1965		315.66	5.08456
459.963	0.95653		461.925	0.410238		461.702	0.379341		460.87	-0.0144705					315.748	19.1088					314.871	22.1959		315.826	5.08437
460.213	0.952995		462.175	0.409719		461.952	0.379049		461.118	-0.0144868					315.914	19.1084					315.037	22.1952		315.993	5.08418
460.463	0.949607		462.424	0.409194		462.201	0.378756		461.367	-0.0144991					316.081	19.1079					315.203	22.1946		316.159	5.08397
460.714	0.946233		462.674	0.40867		462.451	0.378464		461.617	-0.0145234					316.247	19.1075					315.37	22.1939		316.326	5.08377
460.962	0.94264		462.924	0.408148		462.701	0.378171		461.866	-0.0145472					316.413	19.107					315.536	22.1933		316.492	5.08358
461.213	0.939011		463.174	0.407628		462.95	0.377876		462.115	-0.0145757					316.58	19.1066					315.703	22.1926		316.658	5.08339
461.463	0.935389		463.423	0.407108		463.2	0.377569		462.364	-0.0145953					316.747	19.1061					315.869	22.1919		316.825	5.08319
461.713	0.931751		463.673	0.406589		463.449	0.377265		462.614	-0.0146115					316.913	19.1057					316.035	22.1913		316.991	5.08299
461.964	0.928261		463.922	0.406064		463.699	0.37696		462.863	-0.0146194					317.078	19.1052					316.202	22.1906		317.158	5.08279
462.214	0.924711		464.171	0.40553		463.949	0.376662		463.113	-0.0146217					317.246	19.1048					316.368	22.1899		317.324	5.08258
462.464	0.921148		464.422	0.40499		464.198	0.376364		463.363	-0.0146207					317.412	19.1043					316.534	22.1893		317.491	5.08239
462.715	0.917603		464.671	0.404457		464.449	0.376066		463.612	-0.0146041					317.579	19.1038					316.701	22.1886		317.658	5.08219
462.966	0.913862		464.921	0.40393		464.698	0.375768		463.862	-0.0146159					317.745	19.1033					316.868	22.1879		317.824	5.08199
463.217	0.909865		465.171	0.4034		464.947	0.375466		464.112	-0.0146322					317.912	19.1029					317.034	22.1872		317.99	5.08179
463.468	0.905827		465.421	0.402867		465.197	0.375155		464.361	-0.014652					318.079	19.1024					317.201	22.1865		318.156	5.08159
463.719	0.902783		465.67	0.402333		465.447	0.374845		464.61	-0.0146641					318.245	19.1019					317.367	22.1858		318.324	5.08139
463.971	0.90068		465.919	0.401792		465.697	0.374538		464.861	-0.0146686					318.411	19.1014					317.533	22.1851		318.49	5.08118
464.223	0.898039		466.168	0.401245		465.945	0.374229		465.11	-0.0146889					318.578	19.101					317.699	22.1844		318.656	5.08098
464.475	0.894583		466.419	0.400693		466.194	0.373923		465.36	-0.0146968					318.744	19.1005					317.866	22.1837		318.822	5.08077
464.728	0.890374		466.668	0.400149		466.443	0.373618		465.609	-0.0146771					318.91	19.1					318.033	22.1829		318.989	5.08056
464.981	0.885768		466.917	0.399608		466.694	0.373306		465.859	-0.0146559					319.077	19.0995					318.199	22.1822		319.156	5.08036
465.232	0.880898		467.167	0.399066		466.942	0.37299		466.109	-0.0146603					319.245	19.099					318.365	22.1814		319.322	5.08015
465.484	0.876118		467.417	0.398522		467.192	0.372671		466.357	-0.0146675					319.409	19.0985					318.532	22.1807		319.489	5.07995
465.735	0.871466		467.666	0.397981		467.441	0.37235		466.607	-0.014679					319.576	19.098					318.699	22.18		319.654	5.07974
465.986	0.86706		467.916	0.39743		467.691	0.372033		466.857	-0.0146766					319.742	19.0975					318.865	22.1792		319.821	5.07953
466.237	0.862539		468.166	0.396869		467.941	0.371721		467.106	-0.0146875					319.909	19.097					319.031	22.1784		319.988	5.07932
466.488	0.857846		468.415	0.39631		468.191	0.371405		467.354	-0.0147103					320.075	19.0964					319.198	22.1776		320.154	5.07911
466.738	0.853122		468.665	0.395752		468.44	0.371093		467.604	-0.0147444					320.241	19.0959					319.364	22.1767		320.321	5.0789
466.988	0.848444		468.915	0.395196		468.689	0.370777		467.853	-0.0147759					320.408	19.0954					319.531	22.176		320.488	5.0787
467.238	0.843701		469.163	0.394642		468.939	0.370459		468.103	-0.0148077					320.574	19.0949					319.697	22.1752		320.654	5.07848
467.488	0.839039		469.413	0.394087		469.187	0.370131		468.352	-0.0148324					320.74	19.0944					319.863	22.1744		320.821	5.07827
467.737	0.834486		469.662	0.393531		469.437	0.369801		468.601	-0.0148368					320.906	19.0938					320.029	22.1736		320.987	5.07806
467.986	0.829835		469.912	0.392964		469.686	0.369473		468.851	-0.0148165					321.074	19.0933					320.196	22.1728		321.154	5.07784
468.236	0.825214		470.161	0.392393		469.934	0.369144		469.1	-0.0147843					321.24	19.0928					320.363	22.1719		321.32	5.07762
468.485	0.8205		470.41	0.391822		470.184	0.368818		469.35	-0.014781					321.407	19.0922					320.529	22.171		321.487	5.07741
468.733	0.815629		470.659	0.391248		470.433	0.368495		469.6	-0.0148003					321.573	19.0917					320.696	22.1702		321.654	5.0772
468.982	0.810473		470.909	0.390677		470.682	0.368174		469.849	-0.0148187					321.74	19.0911					320.862	22.1694		321.82	5.07699
469.231	0.805392		471.158	0.390112		470.932	0.367843		470.099	-0.0148258					321.906	19.0906					321.028	22.1686		321.986	5.07677
469.479	0.80028		471.408	0.389545		471.181	0.367508		470.349	-0.0148568					322.072	19.09					321.195	22.1678		322.152	5.07656
469.729	0.795258		471.657	0.388972		471.43	0.367167		470.599	-0.0148766					322.238	19.0895					321.362	22.1669		322.317	5.07635
469.978	0.790431		471.907	0.388394		471.679	0.366825		470.849	-0.0149098					322.404	19.0889					321.528	22.1661		322.484	5.07614
470.227	0.785503		472.156	0.387813		471.929	0.366486		471.098	-0.0149187					322.571	19.0884					321.695	22.1652		322.651	5.0759
470.476	0.780385		472.407	0.387228		472.178	0.366146		471.348	-0.014952					322.737	19.0878					321.861	22.1643		322.816	5.07567
470.725	0.775136		472.656	0.386648		472.427	0.365809		471.597	-0.0149559					322.904	19.0872					322.027	22.1635		322.983	5.07544
470.975	0.769927		472.907	0.386069		472.677	0.365474		471.846	-0.0149832					323.07	19.0867					322.194	22.1626		323.151	5.07522
471.224	0.764735		473.156	0.385497		472.926	0.365139		472.096	-0.0150098					323.236	19.0861					322.36	22.1618		323.317	5.075
471.473	0.759605		473.407	0.384924		473.175	0.364793		472.345	-0.0150287					323.402	19.0855					322.526	22.161		323.482	5.07478
471.721	0.754597		473.656	0.384341		473.424	0.364442		472.594	-0.0150535					323.569	19.0849					322.692	22.1602		323.649	5.07456
471.971	0.74967		473.906	0.383747		473.674	0.364088		472.843	-0.0150556					323.735	19.0844					322.859	22.1593		323.815	5.07434
472.22	0.74456		474.156	0.383148		473.922	0.363739		473.093	-0.0150674					323.901	19.0838					323.024	22.1584		323.982	5.07411
472.469	0.739565		474.407	0.382546		474.173	0.363395		473.342	-0.0150844					324.069	19.0832					323.191	22.1575		324.148	5.07387
472.718	0.734317		474.657	0.381943		474.421	0.363052		473.591	-0.0151074					324.235	19.0826					323.357	22.1566		324.315	5.07364
472.967	0.729034		474.907	0.381347		474.67	0.3627		473.84	-0.0151264					324.402	19.082					323.524	22.1557		324.481	5.07341
473.216	0.723726		475.158	0.38075		474.918	0.362343		474.09	-0.0151486					324.568	19.0814					323.69	22.1549		324.647	5.07318
473.465	0.718567		475.407	0.38015		475.168	0.361978		474.339	-0.0151747					324.735	19.0807					323.857	22.1541		324.813	5.07294
473.715	0.713147		475.658	0.379546		475.416	0.361608		474.589	-0.0151988					324.902	19.0801					324.023	22.1532		324.98	5.0727
473.965	0.707744		475.907	0.378934		475.665	0.361241		474.838	-0.0152203					325.069	19.0795					324.19	22.1524		325.146	5.07245
474.215	0.702386		476.156	0.378323		475.914	0.36088		475.088	-0.0152458					325.234	19.0789					324.357	22.1515		325.313	5.07222
474.465	0.696817		476.407	0.377711		476.163	0.360523		475.337	-0.0152593					325.401	19.0783					324.523	22.1506		325.479	5.07197
474.714	0.691222		476.656	0.377095		476.413	0.360163		475.586	-0.0152656					325.568	19.0777					324.689	22.1497		325.646	5.07173
474.965	0.685692		476.907	0.376479		476.661	0.359801		475.836	-0.0152758					325.734	19.077					324.856	22.1489		325.811	5.07149
475.215	0.680365		477.157	0.375866		476.91	0.359432		476.086	-0.0152754					325.9	19.0764					325.023	22.148		325.978	5.07125
475.465	0.675105		477.406	0.375249		477.16	0.359055		476.335	-0.0152714					326.066	19.0758					325.189	22.1472		326.144	5.071
475.713	0.669876		477.656	0.374625		477.407	0.358677		476.585	-0.0152625					326.233	19.0751					325.356	22.1463		326.311	5.07075
475.964	0.664566		477.906	0.373991		477.656	0.358299		476.835	-0.0152557					326.398	19.0744					325.522	22.1455		326.477	5.0705
476.213	0.658992		478.155	0.373359		477.905	0.357917		477.085	-0.0152424					326.565	19.0738					325.689	22.1446		326.644	5.07024
476.464	0.653156		478.405	0.372736		478.154	0.357542		477.334	-0.0152241					326.73	19.0732					325.854	22.1438		326.809	5.06998
476.713	0.64711		478.654	0.372112		478.403	0.357165		477.584	-0.0151919					326.897	19.0725					326.021	22.143		326.977	5.06973
476.963	0.641274		478.903	0.371484		478.652	0.356785		477.834	-0.0151542					327.063	19.0719					326.188	22.1422		327.143	5.06948
477.214	0.63529		479.153	0.37085		478.902	0.356401		478.083	-0.0151227					327.228	19.0712					326.354	22.1414		327.309	5.06923
477.465	0.629274		479.402	0.370214		479.152	0.356013		478.332	-0.0151386					327.395	19.0705					326.52	22.1406		327.475	5.06897
477.715	0.623381		479.653	0.369569		479.401	0.355621		478.582	-0.0151721					327.56	19.0698					326.687	22.1397		327.641	5.06871
477.966	0.617098		479.902	0.36892		479.65	0.355218		478.831	-0.015212					327.726	19.0692					326.853	22.1388		327.807	5.06844
478.217	0.610387		480.151	0.368269		479.9	0.354813		479.081	-0.0152311					327.892	19.0685					327.019	22.138		327.974	5.06817
478.468	0.603481		480.401	0.367616		480.15	0.354414		479.33	-0.0152611					328.058	19.0678					327.186	22.1371		328.14	5.06791
478.72	0.595848		480.65	0.366968		480.398	0.354017		479.58	-0.015287					328.224	19.0671					327.351	22.1361		328.307	5.06764
478.971	0.586538		480.9	0.366316		480.648	0.35362		479.829	-0.015319					328.391	19.0664					327.518	22.1352		328.474	5.06738
479.224	0.57728		481.15	0.365661		480.897	0.353216		480.078	-0.0153568					328.558	19.0657					327.685	22.1343		328.64	5.06711
479.477	0.570193		481.4	0.365002		481.147	0.352811		480.328	-0.0153791					328.724	19.065					327.852	22.1334		328.806	5.06684
479.728	0.564475		481.649	0.364333		481.395	0.352401		480.578	-0.0154061					328.89	19.0643					328.018	22.1325		328.972	5.06656
479.979	0.558956		481.899	0.363663		481.645	0.351983		480.828	-0.0154309					329.057	19.0636					328.185	22.1316		329.139	5.06629
480.227	0.553227		482.149	0.362995		481.895	0.351564		481.077	-0.0154442					329.224	19.0629					328.351	22.1306		329.306	5.06602
480.475	0.547394		482.398	0.362328		482.145	0.351151		481.327	-0.0154593					329.391	19.0621					328.518	22.1296		329.473	5.06574
480.722	0.541603		482.648	0.361656		482.395	0.350736		481.577	-0.0154786					329.557	19.0614					328.684	22.1286		329.639	5.06547
480.969	0.535779		482.898	0.360982		482.644	0.350318		481.826	-0.0155056					329.724	19.0607					328.851	22.1276		329.805	5.06519
481.215	0.52977		483.147	0.360304		482.893	0.349893		482.076	-0.0155193					329.891	19.06					329.018	22.1266		329.972	5.06491
481.462	0.523782		483.396	0.359615		483.143	0.349459		482.326	-0.0155283					330.058	19.0592					329.184	22.1255		330.139	5.06462
481.71	0.517737		483.646	0.35892		483.394	0.349023		482.575	-0.0155502					330.224	19.0585					329.35	22.1245		330.305	5.06434
481.957	0.51148		483.897	0.358228		483.643	0.348583		482.825	-0.015588					330.391	19.0577					329.517	22.1235		330.471	5.06405
482.205	0.505091		484.145	0.357533		483.893	0.348143		483.075	-0.0156205					330.557	19.0569					329.683	22.1224		330.638	5.06376
482.453	0.49878		484.395	0.356838		484.143	0.347707		483.324	-0.0156411					330.724	19.0562					329.851	22.1213		330.803	5.06348
482.701	0.492172		484.645	0.356144		484.394	0.347273		483.573	-0.0156633					330.89	19.0554					330.017	22.1201		330.97	5.06319
482.949	0.485764		484.894	0.355441		484.643	0.346832		483.823	-0.0156649					331.057	19.0546					330.182	22.119		331.136	5.0629
483.198	0.479257		485.144	0.354729		484.893	0.346384		484.072	-0.0156748					331.223	19.0538					330.349	22.1179		331.304	5.0626
483.446	0.472755		485.394	0.354014		485.143	0.345929		484.321	-0.0157029					331.389	19.053					330.515	22.1167		331.47	5.06231
483.695	0.466143		485.643	0.353297		485.393	0.345475		484.57	-0.015731					331.555	19.0522					330.682	22.1155		331.635	5.062
483.945	0.459368		485.892	0.352578		485.644	0.345015		484.819	-0.0157472					331.722	19.0514					330.847	22.1144		331.803	5.0617
484.194	0.452432		486.142	0.351867		485.895	0.344549		485.068	-0.0157401					331.888	19.0506					331.014	22.1132		331.969	5.06139
484.444	0.445415		486.392	0.351158		486.145	0.344084		485.318	-0.0157188					332.054	19.0498					331.18	22.1119		332.136	5.06108
484.693	0.438597		486.641	0.350448		486.395	0.343621		485.566	-0.0157248					332.22	19.0489					331.347	22.1106		332.302	5.06078
484.943	0.4317		486.891	0.349727		486.646	0.343164		485.815	-0.0157435					332.387	19.0481					331.513	22.1092		332.469	5.06047
485.194	0.424744		487.14	0.348991		486.897	0.342697		486.065	-0.0157624					332.553	19.0472					331.679	22.108		332.635	5.06016
485.444	0.417957		487.389	0.348241		487.147	0.342221		486.313	-0.0157812					332.72	19.0463					331.845	22.1067		332.801	5.05984
485.694	0.411049		487.638	0.34749		487.397	0.341745		486.564	-0.0158098					332.886	19.0454					332.012	22.1054		332.968	5.05951
485.945	0.403802		487.887	0.346745		487.648	0.341261		486.812	-0.0158237					333.053	19.0445					332.178	22.1042		333.135	5.05919
486.195	0.396533		488.138	0.345995		487.898	0.340772		487.062	-0.0158337					333.22	19.0435					332.345	22.1029		333.301	5.05886
486.445	0.389241		488.387	0.345241		488.147	0.340281		487.311	-0.0158525					333.387	19.0426					332.512	22.1015		333.467	5.05853
486.696	0.381713		488.638	0.344488		488.397	0.33979		487.561	-0.0158569					333.553	19.0417					332.677	22.1		333.634	5.05819
486.947	0.374254		488.887	0.34373		488.647	0.339298		487.81	-0.0158564					333.72	19.0407					332.844	22.0985		333.799	5.05786
487.197	0.366786		489.137	0.342963		488.897	0.338804		488.06	-0.0159147					333.887	19.0396					333.01	22.097		333.965	5.05752
487.448	0.358912		489.386	0.342192		489.147	0.338303		488.309	-0.0159668					334.054	19.0385					333.177	22.0956		334.132	5.05718
487.699	0.35025		489.635	0.341425		489.397	0.337795		488.559	-0.0160071					334.221	19.0373					333.342	22.0942		334.298	5.05683
487.951	0.340081		489.886	0.34066		489.647	0.337284		488.808	-0.0160434					334.387	19.0363					333.509	22.0928		334.465	5.05648
488.205	0.330177		490.135	0.33989		489.895	0.336767		489.058	-0.01608					334.553	19.0351					333.676	22.0914		334.631	5.05613
488.458	0.322108		490.385	0.33912		490.146	0.336248		489.307	-0.0161095					334.72	19.034					333.843	22.0899		334.798	5.05577
488.71	0.314911		490.634	0.338342		490.396	0.335729		489.556	-0.0161326					334.886	19.0329					334.009	22.0884		334.965	5.05541
488.962	0.307676		490.884	0.337553		490.646	0.33521		489.806	-0.016139					335.052	19.0317					334.175	22.0869		335.131	5.05506
489.211	0.300404		491.133	0.336749		490.896	0.334682		490.055	-0.0161612					335.218	19.0305					334.341	22.0854		335.298	5.05469
489.46	0.292462		491.383	0.33594		491.146	0.334145		490.305	-0.0161864					335.385	19.0292					334.508	22.0839		335.465	5.05432
489.709	0.284104		491.633	0.335143		491.397	0.333601		490.554	-0.0162143					335.551	19.0279					334.674	22.0822		335.632	5.05394
489.958	0.27418		491.882	0.334347		491.647	0.333053		490.804	-0.0162457					335.718	19.0266					334.84	22.0805		335.798	5.05356
490.209	0.265363		492.131	0.33355		491.896	0.332505		491.053	-0.0162794					335.884	19.0253					335.007	22.0788		335.964	5.05317
490.459	0.25683		492.381	0.332751		492.147	0.331957		491.302	-0.0163097					336.05	19.0239					335.174	22.0772		336.131	5.05279
490.709	0.24527		492.63	0.331944		492.397	0.331411		491.553	-0.0163354					336.217	19.0226					335.339	22.0755		336.296	5.0524
490.962	0.231173		492.879	0.331128		492.647	0.330863		491.802	-0.0163571					336.384	19.0212					335.506	22.0737		336.464	5.052
491.214	0.218267		493.129	0.330285		492.898	0.330307		492.052	-0.0163794					336.549	19.0198					335.673	22.0719		336.629	5.0516
491.466	0.207717		493.378	0.329434		493.148	0.329742		492.302	-0.0164091					336.717	19.0182					335.839	22.0701		336.796	5.05119
491.718	0.19832		493.628	0.328605		493.398	0.32917		492.552	-0.0164384					336.883	19.0167					336.005	22.0684		336.962	5.05078
491.966	0.188553		493.878	0.327779		493.648	0.328591		492.801	-0.0164676					337.049	19.0153					336.171	22.0666		337.129	5.05036
492.214	0.1782		494.126	0.326949		493.897	0.328013		493.05	-0.0164988					337.215	19.0137					336.338	22.0647		337.296	5.04993
492.462	0.167042		494.376	0.326113		494.148	0.327434		493.3	-0.0165297					337.381	19.0122					336.505	22.0628		337.461	5.0495
492.71	0.158232		494.626	0.325271		494.398	0.326856		493.55	-0.0165533					337.547	19.0106					336.67	22.0608		337.628	5.04907
492.957	0.152824		494.875	0.324407		494.647	0.326274		493.799	-0.0165741					337.714	19.009					336.837	22.0589		337.794	5.04863
493.201	0.146825		495.125	0.32354		494.897	0.325689		494.048	-0.0165942					337.879	19.0074					337.004	22.0569		337.96	5.04818
493.443	0.138254		495.374	0.322686		495.148	0.325096		494.298	-0.016616					338.045	19.0056					337.17	22.055		338.126	5.04773
493.687	0.130377		495.623	0.321819		495.398	0.324498		494.548	-0.0166422					338.212	19.0039					337.337	22.0531		338.293	5.04727
493.931	0.125407		495.873	0.320943		495.648	0.323891		494.797	-0.01667					338.378	19.0022					337.502	22.0511		338.459	5.0468
494.173	0.121312		496.122	0.320081		495.898	0.32328		495.046	-0.0166948					338.544	19.0004					337.669	22.0492		338.626	5.04633
494.414	0.115229		496.372	0.319193		496.148	0.32267		495.296	-0.0167182					338.711	18.9987					337.836	22.0471		338.792	5.04586
494.658	0.107228		496.621	0.318295		496.398	0.322061		495.545	-0.016744					338.877	18.9968					338.002	22.0451		338.959	5.04537
494.902	0.100849		496.871	0.317395		496.648	0.321443		495.795	-0.0167655					339.045	18.9949					338.168	22.0431		339.125	5.04487
495.147	0.0973464		497.12	0.316479		496.898	0.320816		496.044	-0.0167861					339.21	18.993					338.335	22.041		339.292	5.04436
495.389	0.0948951		497.371	0.315509		497.148	0.320184		496.293	-0.0168092					339.378	18.9911					338.502	22.0389		339.459	5.04385
495.631	0.0928246		497.62	0.314601		497.397	0.319543		496.543	-0.016834					339.544	18.9892					338.668	22.0368		339.625	5.04332
495.871	0.0909067		497.869	0.313713		497.648	0.318898		496.792	-0.0168631					339.711	18.9873					338.834	22.0347		339.792	5.04279
496.112	0.0891005		498.119	0.312825		497.897	0.31825		497.042	-0.0168881					339.876	18.9853					339	22.0326		339.958	5.04226
496.352	0.087482		498.367	0.311909		498.147	0.317601		497.291	-0.016918					340.043	18.9832					339.166	22.0304		340.124	5.04172
496.594	0.0858827					498.396	0.316955		497.541	-0.0169438					340.209	18.9811					339.334	22.0283		340.291	5.04117
496.837	0.0842368								497.79	-0.0169708					340.375	18.9791					339.499	22.0262		340.457	5.04061
497.08	0.0824883								498.039	-0.0169916					340.542	18.9771					339.666	22.0241		340.622	5.04003
497.326	0.0806423								498.287	-0.0170157					340.708	18.9749					339.833	22.022		340.789	5.03944
497.573	0.0786666														340.875	18.9729					339.999	22.0197		340.956	5.03885
497.821	0.0768246														341.04	18.9708					340.165	22.0171		341.122	5.03826
498.069	0.0750383														341.207	18.9686					340.332	22.0145		341.288	5.03765
498.318	0.0733387														341.373	18.9663					340.498	22.012		341.455	5.03704
															341.54	18.964					340.665	22.0096		341.621	5.03642
															341.706	18.9617					340.831	22.0072		341.787	5.03578
															341.872	18.9595					340.997	22.0049		341.954	5.03514
															342.038	18.9572					341.164	22.0025		342.119	5.03448
															342.205	18.955					341.33	22.0001		342.287	5.03381
															342.371	18.9526					341.495	21.9978		342.453	5.03314
															342.538	18.9502					341.663	21.9954		342.618	5.03245
															342.705	18.9476					341.829	21.993		342.785	5.03175
															342.87	18.945					341.995	21.9905		342.951	5.03104
															343.036	18.9424					342.161	21.9879		343.118	5.03032
															343.202	18.9398					342.328	21.9853		343.285	5.02958
															343.368	18.9372					342.494	21.9825		343.451	5.02881
															343.536	18.9346					342.661	21.9797		343.618	5.02795
															343.702	18.9318					342.827	21.9767		343.784	5.02711
															343.868	18.929					342.993	21.9738		343.951	5.02621
															344.035	18.926					343.16	21.9707		344.117	5.02531
															344.201	18.9231					343.326	21.9677		344.283	5.02435
															344.368	18.9203					343.492	21.9644		344.45	5.02334
															344.535	18.9174					343.659	21.9611		344.616	5.02223
															344.701	18.9144					343.825	21.9577		344.782	5.02113
															344.867	18.9114					343.991	21.9544		344.948	5.02009
															345.033	18.9082					344.158	21.951		345.115	5.01905
															345.2	18.9049					344.324	21.9477		345.28	5.01799
															345.366	18.9017					344.49	21.9444		345.447	5.0169
															345.533	18.8984					344.657	21.941		345.614	5.01574
															345.7	18.8952					344.823	21.9376		345.781	5.01452
															345.867	18.892					344.99	21.9341		345.947	5.01325
															346.034	18.8888					345.157	21.9304		346.114	5.01201
															346.199	18.8855					345.323	21.9267		346.28	5.01078
															346.367	18.8822					345.491	21.9233		346.447	5.00951
															346.533	18.8787					345.657	21.9198		346.613	5.00813
															346.699	18.8751					345.823	21.9162		346.78	5.00673
															346.866	18.8716					345.989	21.9123		346.946	5.00525
															347.033	18.868					346.156	21.9083		347.112	5.00381
															347.199	18.8645					346.322	21.9043		347.279	5.00228
															347.365	18.861					346.489	21.9005		347.446	5.00083
															347.532	18.8575					346.655	21.8967		347.612	4.99939
															347.698	18.8539					346.822	21.8928		347.778	4.99791
															347.864	18.8501					346.988	21.8889		347.944	4.99641
															348.031	18.8463					347.154	21.8849		348.111	4.99484
															348.197	18.8424					347.321	21.8808		348.277	4.99321
															348.363	18.8386					347.487	21.8766		348.443	4.9914
															348.529	18.8347					347.654	21.8721		348.609	4.98964
															348.695	18.8306					347.82	21.8677		348.776	4.98792
															348.862	18.8262					347.987	21.8635		348.942	4.98616
															349.028	18.8215					348.154	21.8592		349.108	4.98433
															349.195	18.817					348.321	21.8549		349.274	4.9824
															349.361	18.8125					348.486	21.8506		349.44	4.98042
															349.528	18.8081					348.652	21.8459		349.606	4.97842
															349.693	18.8035					348.819	21.8409		349.774	4.97638
															349.86	18.7992					348.985	21.836		349.94	4.97431
															350.026	18.7946					349.151	21.8308		350.106	4.97214
															350.194	18.7899					349.317	21.8255		350.272	4.96988
															350.359	18.7851					349.484	21.8205		350.439	4.96748
															350.526	18.78					349.65	21.8154		350.606	4.9649
															350.692	18.7751					349.817	21.8102		350.772	4.96222
															350.858	18.7699					349.983	21.805		350.939	4.95936
															351.024	18.7648					350.149	21.7999		351.105	4.95657
															351.191	18.7599					350.315	21.7945		351.271	4.9537
															351.358	18.7547					350.482	21.7886		351.438	4.95084
															351.523	18.7491					350.647	21.7829		351.604	4.94793
															351.69	18.7434					350.814	21.7769		351.772	4.94509
															351.857	18.7377					350.98	21.7711		351.937	4.94213
															352.022	18.7319					351.147	21.7654		352.103	4.93908
															352.189	18.7262					351.313	21.7597		352.269	4.93589
															352.356	18.7203					351.479	21.7539		352.436	4.9328
															352.522	18.7142					351.645	21.7477		352.602	4.92968
															352.688	18.7081					351.812	21.7414		352.769	4.92651
															352.854	18.7018					351.978	21.7352		352.935	4.92332
															353.02	18.6954					352.145	21.7289		353.101	4.92004
															353.187	18.6889					352.311	21.7225		353.267	4.91681
															353.353	18.6825					352.478	21.7157		353.433	4.91355
															353.519	18.6761					352.644	21.709		353.6	4.91022
															353.686	18.6696					352.81	21.702		353.766	4.90687
															353.852	18.6628					352.977	21.6945		353.933	4.90358
															354.018	18.6559					353.144	21.6869		354.099	4.90044
															354.185	18.6488					353.31	21.6793		354.266	4.89722
															354.35	18.6417					353.476	21.6718		354.433	4.89389
															354.517	18.6345					353.642	21.6643		354.599	4.89048
															354.683	18.6272					353.808	21.6567		354.765	4.88702
															354.85	18.6198					353.975	21.6487		354.932	4.88361
															355.016	18.6126					354.141	21.6404		355.098	4.88015
															355.183	18.6054					354.307	21.6322		355.265	4.8768
															355.349	18.5975					354.474	21.6237		355.431	4.87322
															355.516	18.5895					354.64	21.615		355.597	4.86964
[truncated: 564 more rows]

## Sheet: DSC
	Heat Flow (Normalized) W/g			Heat Flow (Normalized) W/g			Heat Flow (Normalized) W/g			Heat Flow (Normalized) W/g			Heat Flow (Normalized) W/g
Temperature C	PCL-Control		Temperature °C	PCL-Prog		Temperature °C	PCL-E1		Temperature °C	PCL-E2		Temperature °C	PCL-E3
-90.349	-0.00612026		-89.805	0.0246166		-89.836	0.023979		-89.833	0.0213242		-89.83	0.0322938
-90.346	-0.0061607		-89.808	0.0246213		-89.836	0.023994		-89.833	0.0213388		-89.829	0.0322916
-90.347	-0.00619835		-89.807	0.0246264		-89.837	0.0240109		-89.833	0.0213516		-89.83	0.0322878
-90.345	-0.00623848		-89.808	0.024631		-89.838	0.0240225		-89.836	0.0213624		-89.831	0.032283
-90.342	-0.0062809		-89.809	0.0246355		-89.838	0.0240359		-89.836	0.0213769		-89.834	0.0322769
-90.341	-0.00632157		-89.81	0.0246386		-89.839	0.0240522		-89.836	0.0213869		-89.833	0.0322721
-90.34	-0.00636548		-89.81	0.0246417		-89.84	0.0240797		-89.837	0.0213945		-89.833	0.0322668
-90.339	-0.00642009		-89.809	0.0246442		-89.84	0.0241182		-89.838	0.0214023		-89.833	0.0322614
-90.337	-0.0064973		-89.811	0.024647		-89.842	0.024149		-89.839	0.0214075		-89.835	0.0322547
-90.334	-0.00656273		-89.812	0.0246503		-89.843	0.0241638		-89.84	0.0214118		-89.836	0.0322482
-90.333	-0.00663592		-89.811	0.0246532		-89.842	0.0241852		-89.84	0.0214152		-89.837	0.0322423
-90.332	-0.00670516		-89.812	0.0246561		-89.842	0.0242041		-89.841	0.0214188		-89.837	0.0322355
-90.33	-0.00676532		-89.812	0.0246585		-89.842	0.0242155		-89.841	0.0214239		-89.837	0.0322283
-90.327	-0.00681148		-89.813	0.0246595		-89.843	0.0242263		-89.84	0.0214292		-89.837	0.0322198
-90.325	-0.00683395		-89.812	0.0246604		-89.843	0.024238		-89.842	0.0214348		-89.838	0.0322102
-90.324	-0.00686731		-89.812	0.0246615		-89.843	0.0242485		-89.841	0.0214398		-89.839	0.0321888
-90.322	-0.00690509		-89.813	0.0246621		-89.844	0.0242585		-89.839	0.0214447		-89.837	0.0321621
-90.32	-0.00694103		-89.813	0.0246622		-89.844	0.0242688		-89.841	0.0214487		-89.837	0.0321316
-90.319	-0.00698523		-89.813	0.0246616		-89.844	0.0242797		-89.84	0.0214521		-89.837	0.0321106
-90.315	-0.00701786		-89.813	0.024661		-89.844	0.02429		-89.841	0.0214556		-89.838	0.0320797
-90.314	-0.00704103		-89.813	0.0246607		-89.843	0.0243001		-89.84	0.0214586		-89.838	0.0320572
-90.312	-0.00705931		-89.813	0.0246606		-89.843	0.0243117		-89.84	0.0214621		-89.837	0.032031
-90.309	-0.00707302		-89.812	0.0246609		-89.843	0.0243308		-89.839	0.0214659		-89.838	0.0320091
-90.307	-0.00710312		-89.813	0.0246615		-89.842	0.0243515		-89.839	0.0214702		-89.838	0.0319807
-90.305	-0.00711129		-89.812	0.0246619		-89.841	0.0243776		-89.839	0.0214746		-89.836	0.0319504
-90.303	-0.00711582		-89.81	0.0246618		-89.841	0.0244249		-89.839	0.0214806		-89.837	0.0319298
-90.3	-0.00711496		-89.81	0.0246624		-89.84	0.0245084		-89.837	0.0214873		-89.837	0.0319054
-90.297	-0.00710455		-89.809	0.0246632		-89.838	0.0246444		-89.837	0.0214956		-89.835	0.0318881
-90.295	-0.00708535		-89.809	0.0246645		-89.839	0.0248316		-89.835	0.0215084		-89.835	0.0318717
-90.293	-0.00705433		-89.808	0.0246678		-89.836	0.0250942		-89.834	0.0215284		-89.832	0.0318611
-90.29	-0.00699553		-89.807	0.024674		-89.835	0.0254244		-89.832	0.0215729		-89.831	0.0318509
-90.286	-0.0068582		-89.806	0.0246871		-89.835	0.0258367		-89.831	0.0216432		-89.83	0.0318427
-90.283	-0.00659399		-89.804	0.0247217		-89.833	0.0264074		-89.831	0.0217786		-89.83	0.031836
-90.28	-0.00616984		-89.802	0.0247955		-89.832	0.0271642		-89.829	0.0219973		-89.827	0.0318295
-90.275	-0.00541168		-89.8	0.024925		-89.829	0.0281195		-89.826	0.0223452		-89.826	0.0318246
-90.272	-0.00438038		-89.8	0.0251147		-89.829	0.0292691		-89.825	0.0228952		-89.824	0.0318216
-90.267	-0.00287432		-89.797	0.0253582		-89.825	0.0306392		-89.823	0.0235306		-89.824	0.0318216
-90.264	-0.00108628		-89.795	0.0256583		-89.825	0.0320573		-89.821	0.0242142		-89.821	0.0318237
-90.259	0.000904865		-89.792	0.026098		-89.822	0.0336908		-89.821	0.0250824		-89.82	0.0318477
-90.255	0.00272113		-89.789	0.0266911		-89.82	0.035297		-89.818	0.0261019		-89.817	0.0318822
-90.25	0.00461232		-89.786	0.0274261		-89.816	0.036365		-89.815	0.0271812		-89.816	0.0319224
-90.245	0.00625621		-89.784	0.0282586		-89.814	0.0373887		-89.812	0.028258		-89.814	0.03199
-90.242	0.00787675		-89.78	0.0291013		-89.811	0.0383687		-89.809	0.0292585		-89.81	0.0320964
-90.237	0.00924081		-89.779	0.0299554		-89.807	0.0393463		-89.805	0.0300726		-89.808	0.0322432
-90.232	0.0107112		-89.774	0.0307988		-89.804	0.0403515		-89.803	0.031008		-89.804	0.0323866
-90.226	0.0119959		-89.77	0.0315773		-89.799	0.0415608		-89.797	0.031835		-89.8	0.0325067
-90.221	0.0134158		-89.767	0.0322466		-89.794	0.0425943		-89.794	0.0324896		-89.797	0.0326544
-90.215	0.0149108		-89.762	0.0328539		-89.792	0.043676		-89.792	0.0331973		-89.792	0.0328176
-90.211	0.0163255		-89.759	0.033362		-89.788	0.0448906		-89.786	0.0340384		-89.789	0.0330089
-90.205	0.0179173		-89.755	0.0340043		-89.782	0.0462599		-89.783	0.0346629		-89.784	0.0332141
-90.199	0.0193777		-89.75	0.0346289		-89.778	0.0476059		-89.779	0.0353673		-89.781	0.0334168
-90.191	0.0209489		-89.744	0.0352237		-89.772	0.0487757		-89.774	0.0359584		-89.777	0.0335985
-90.184	0.0224539		-89.74	0.0357977		-89.769	0.0499352		-89.768	0.0367693		-89.772	0.0338027
-90.178	0.0240197		-89.735	0.0364465		-89.762	0.0512743		-89.762	0.0375003		-89.767	0.0340539
-90.171	0.0254261		-89.731	0.0370248		-89.756	0.0525418		-89.756	0.0382502		-89.761	0.034279
-90.164	0.0266577		-89.725	0.0375309		-89.75	0.0538601		-89.751	0.0389681		-89.758	0.0344334
-90.156	0.0280701		-89.719	0.0379713		-89.745	0.0549187		-89.745	0.0397605		-89.751	0.0345887
-90.148	0.029345		-89.713	0.0384472		-89.738	0.0560446		-89.739	0.0405788		-89.746	0.0347327
-90.14	0.0306087		-89.707	0.0389676		-89.732	0.0569669		-89.731	0.0411833		-89.741	0.0348215
-90.133	0.0317861		-89.7	0.0394521		-89.725	0.0581298		-89.727	0.0417711		-89.734	0.0349104
-90.123	0.0330173		-89.692	0.0398538		-89.718	0.0593129		-89.72	0.0423375		-89.728	0.0349772
-90.115	0.0343552		-89.686	0.0402966		-89.713	0.0603601		-89.713	0.0428209		-89.723	0.0350344
-90.108	0.035396		-89.68	0.0407546		-89.705	0.0612385		-89.706	0.0433351		-89.715	0.035065
-90.099	0.0368805		-89.672	0.0410597		-89.698	0.0620977		-89.698	0.0436952		-89.709	0.0350855
-90.09	0.0382003		-89.665	0.041358		-89.69	0.0631239		-89.692	0.0439258		-89.703	0.0350987
-90.08	0.0393871		-89.657	0.0418163		-89.68	0.063965		-89.684	0.0442592		-89.694	0.0351023
-90.072	0.0403187		-89.65	0.0421043		-89.673	0.0650329		-89.679	0.044511		-89.688	0.0350954
-90.063	0.0412814		-89.64	0.0422574		-89.665	0.0657857		-89.668	0.0449099		-89.681	0.0350875
-90.052	0.0418932		-89.632	0.0422864		-89.656	0.0664452		-89.661	0.0453442		-89.674	0.0350719
-90.042	0.0424551		-89.624	0.0423695		-89.648	0.0669786		-89.652	0.0454684		-89.665	0.0350284
-90.032	0.0425788		-89.616	0.0424434		-89.639	0.0674836		-89.643	0.0455495		-89.657	0.0349365
-90.022	0.0431269		-89.607	0.0423822		-89.631	0.0680793		-89.634	0.0455975		-89.649	0.0347411
-90.011	0.0434861		-89.598	0.0425501		-89.621	0.0685816		-89.625	0.0455939		-89.641	0.0343645
-90	0.0440444		-89.589	0.0426097		-89.611	0.0689253		-89.617	0.045508		-89.631	0.0337421
-89.99	0.0444963		-89.579	0.0425974		-89.601	0.0694652		-89.607	0.0454472		-89.623	0.0329245
-89.979	0.0450012		-89.57	0.0423519		-89.592	0.0696604		-89.598	0.0452953		-89.613	0.0319075
-89.967	0.0452957		-89.56	0.0422766		-89.583	0.0696833		-89.589	0.0450131		-89.606	0.0306369
-89.956	0.0455263		-89.55	0.0421592		-89.572	0.0697367		-89.579	0.0448897		-89.596	0.0290189
-89.945	0.045906		-89.541	0.0419871		-89.561	0.0698833		-89.568	0.0448295		-89.586	0.0272242
-89.934	0.0459749		-89.531	0.041798		-89.551	0.0698449		-89.558	0.0446788		-89.576	0.0254544
-89.922	0.0460158		-89.521	0.0411137		-89.541	0.0697934		-89.548	0.0444599		-89.567	0.0240077
-89.912	0.0458578		-89.511	0.0406295		-89.53	0.069767		-89.538	0.0435331		-89.557	0.0228547
-89.9	0.0454577		-89.501	0.0402834		-89.52	0.0694388		-89.528	0.043095		-89.547	0.0218923
-89.887	0.0450595		-89.489	0.0400094		-89.509	0.0690186		-89.517	0.0426374		-89.538	0.0210298
-89.876	0.0448206		-89.478	0.0398209		-89.498	0.068665		-89.506	0.0422682		-89.526	0.0200671
-89.865	0.0443097		-89.468	0.0396177		-89.485	0.0683653		-89.495	0.0420282		-89.516	0.0188746
-89.852	0.0437883		-89.457	0.0392994		-89.476	0.0681362		-89.485	0.0417067		-89.506	0.0174701
-89.84	0.0424428		-89.445	0.038849		-89.464	0.0677478		-89.474	0.0412009		-89.494	0.0161852
-89.827	0.0416234		-89.434	0.0381906		-89.451	0.0666206		-89.463	0.0405413		-89.483	0.0145656
-89.815	0.0405036		-89.423	0.0373182		-89.44	0.0659795		-89.452	0.0397343		-89.473	0.0133952
-89.802	0.0398271		-89.411	0.0359854		-89.428	0.0651761		-89.44	0.0387475		-89.461	0.0118348
-89.788	0.0391048		-89.4	0.0344555		-89.416	0.0644147		-89.429	0.0375535		-89.45	0.010249
-89.776	0.0385855		-89.388	0.0329503		-89.404	0.0638523		-89.416	0.0359328		-89.438	0.00881724
-89.763	0.0381204		-89.377	0.0317238		-89.392	0.0633705		-89.403	0.0340207		-89.426	0.00743487
-89.751	0.0374059		-89.363	0.030714		-89.38	0.0624522		-89.391	0.0324266		-89.416	0.00626469
-89.738	0.0364457		-89.352	0.0295885		-89.365	0.0612118		-89.378	0.0310034		-89.404	0.00492605
-89.725	0.0352943		-89.34	0.0285768		-89.354	0.0596709		-89.367	0.0296334		-89.392	0.00302927
-89.712	0.033814		-89.327	0.0275338		-89.342	0.0582725		-89.355	0.0282601		-89.381	0.00119861
-89.699	0.0323016		-89.316	0.0263264		-89.331	0.0567962		-89.344	0.0271081		-89.367	-0.000634405
-89.687	0.0307315		-89.303	0.0251623		-89.318	0.0551777		-89.331	0.0258196		-89.356	-0.00238293
-89.673	0.0290685		-89.292	0.0238326		-89.304	0.0535578		-89.318	0.024439		-89.344	-0.00395681
-89.66	0.0272523		-89.28	0.0225806		-89.291	0.0518121		-89.306	0.0230503		-89.333	-0.00546184
-89.646	0.0248042		-89.267	0.0213392		-89.28	0.050525		-89.294	0.0215592		-89.319	-0.00719238
-89.632	0.0224438		-89.255	0.0199676		-89.266	0.0490892		-89.28	0.0199686		-89.307	-0.0087785
-89.618	0.0199896		-89.241	0.0184773		-89.255	0.0476667		-89.269	0.0183587		-89.294	-0.0103755
-89.604	0.0182047		-89.228	0.0169557		-89.241	0.0459241		-89.255	0.016892		-89.282	-0.0120138
-89.592	0.0160916		-89.217	0.0156953		-89.227	0.0442169		-89.242	0.0151189		-89.269	-0.0136398
-89.579	0.0143894		-89.203	0.0144427		-89.214	0.0423096		-89.229	0.0133839		-89.257	-0.0154578
-89.565	0.0126722		-89.191	0.0130623		-89.202	0.0405452		-89.217	0.011788		-89.244	-0.0170141
-89.551	0.0108262		-89.177	0.0114476		-89.189	0.0386534		-89.203	0.0102935		-89.232	-0.0192889
-89.538	0.00925719		-89.164	0.0100705		-89.175	0.0365839		-89.191	0.00867517		-89.217	-0.0211123
-89.524	0.00748901		-89.152	0.00840411		-89.162	0.0346672		-89.18	0.00711544		-89.204	-0.0226221
-89.509	0.00572408		-89.14	0.00687632		-89.148	0.0328454		-89.165	0.00546182		-89.193	-0.0241349
-89.496	0.00374319		-89.125	0.00534169		-89.134	0.0308251		-89.152	0.00376531		-89.179	-0.0257059
-89.482	0.00206964		-89.112	0.00392666		-89.121	0.0288387		-89.14	0.00202023		-89.164	-0.0272126
-89.467	0.000170834		-89.099	0.00239607		-89.108	0.0272092		-89.126	0.000296692		-89.152	-0.028943
-89.454	-0.00173041		-89.087	0.000727727		-89.094	0.0254086		-89.114	-0.00140897		-89.14	-0.0307004
-89.44	-0.00332342		-89.074	-0.000725263		-89.081	0.0233891		-89.1	-0.00308528		-89.125	-0.0324432
-89.426	-0.00496698		-89.06	-0.00209909		-89.067	0.0214274		-89.086	-0.00472673		-89.112	-0.0338357
-89.412	-0.00674478		-89.048	-0.00360251		-89.054	0.0196883		-89.073	-0.00654785		-89.099	-0.0353371
-89.399	-0.00880487		-89.036	-0.0050526		-89.042	0.0176494		-89.06	-0.00794606		-89.086	-0.0369556
-89.385	-0.0102206		-89.022	-0.00647051		-89.029	0.0157585		-89.046	-0.00958421		-89.072	-0.0386076
-89.371	-0.0117304		-89.008	-0.00801112		-89.015	0.0141155		-89.032	-0.0112899		-89.058	-0.0400704
-89.358	-0.0136234		-88.995	-0.00939452		-89.001	0.0123776		-89.02	-0.0130761		-89.044	-0.0416089
-89.344	-0.0153693		-88.982	-0.0110768		-88.987	0.0106514		-89.007	-0.0145962		-89.032	-0.0429839
-89.33	-0.0170693		-88.97	-0.0124767		-88.973	0.00897461		-88.994	-0.0162641		-89.016	-0.0442488
-89.316	-0.0190118		-88.957	-0.0138217		-88.959	0.0072813		-88.98	-0.0179108		-89.005	-0.0456496
-89.303	-0.0206692		-88.943	-0.0153197		-88.945	0.00564772		-88.967	-0.019507		-88.99	-0.0471887
-89.289	-0.0223098		-88.93	-0.0168094		-88.931	0.00411059		-88.952	-0.0211672		-88.976	-0.0485043
-89.273	-0.0234879		-88.917	-0.0182025		-88.918	0.00233199		-88.94	-0.0226153		-88.964	-0.049841
-89.259	-0.0249703		-88.902	-0.0195521		-88.905	0.000647889		-88.925	-0.024246		-88.951	-0.0511401
-89.246	-0.0262832		-88.89	-0.0208897		-88.891	-0.00128448		-88.913	-0.0254892		-88.935	-0.0525912
-89.231	-0.0274549		-88.875	-0.0220786		-88.877	-0.00303586		-88.899	-0.0266405		-88.922	-0.0541312
-89.218	-0.0284795		-88.863	-0.0234021		-88.864	-0.00476016		-88.886	-0.0281289		-88.909	-0.0553579
-89.202	-0.0300959		-88.848	-0.0247924		-88.848	-0.00625367		-88.872	-0.0296685		-88.895	-0.0567119
-89.189	-0.0312344		-88.836	-0.0261301		-88.835	-0.00781838		-88.858	-0.0312167		-88.882	-0.0580634
-89.176	-0.0322916		-88.821	-0.027445		-88.823	-0.00936801		-88.844	-0.0325108		-88.865	-0.0592236
-89.161	-0.0337458		-88.808	-0.0285114		-88.809	-0.0110635		-88.83	-0.0336991		-88.854	-0.0603952
-89.146	-0.0351399		-88.795	-0.0298292		-88.797	-0.0124187		-88.817	-0.0350215		-88.838	-0.0613103
-89.132	-0.0365925		-88.782	-0.0310636		-88.782	-0.013897		-88.802	-0.0362306		-88.824	-0.0621326
-89.119	-0.0376056		-88.768	-0.0322079		-88.766	-0.0154139		-88.79	-0.0375301		-88.811	-0.0630815
-89.105	-0.0388454		-88.754	-0.0334538		-88.753	-0.0170016		-88.776	-0.0388038		-88.797	-0.06396
-89.089	-0.0397098		-88.74	-0.0345365		-88.741	-0.0183919		-88.762	-0.0399486		-88.782	-0.0649619
-89.075	-0.0405602		-88.727	-0.0355683		-88.726	-0.0197287		-88.748	-0.0410302		-88.769	-0.0658875
-89.061	-0.0412861		-88.714	-0.0367087		-88.712	-0.0211314		-88.737	-0.0422612		-88.755	-0.0665419
-89.047	-0.0424525		-88.7	-0.0377656		-88.698	-0.0222977		-88.723	-0.0433837		-88.741	-0.067439
-89.031	-0.0436609		-88.687	-0.0387363		-88.685	-0.0235118		-88.707	-0.0446154		-88.728	-0.0687011
-89.017	-0.0447552		-88.673	-0.0396261		-88.67	-0.0247953		-88.695	-0.0455396		-88.713	-0.0698099
-89.002	-0.0457015		-88.66	-0.0404779		-88.656	-0.0260722		-88.681	-0.0464458		-88.699	-0.0710646
-88.988	-0.0465702		-88.646	-0.0415111		-88.641	-0.0268899		-88.666	-0.0473159		-88.683	-0.0720349
-88.973	-0.0475379		-88.633	-0.0426091		-88.629	-0.0279899		-88.652	-0.0483457		-88.671	-0.0729605
-88.96	-0.0480265		-88.619	-0.0435636		-88.614	-0.0288446		-88.64	-0.0490446		-88.655	-0.0738215
-88.946	-0.0489653		-88.605	-0.0445004		-88.599	-0.0297549		-88.625	-0.0500403		-88.641	-0.0746546
-88.929	-0.0493384		-88.592	-0.0455673		-88.585	-0.0306721		-88.61	-0.0512202		-88.627	-0.0752791
-88.915	-0.0496035		-88.576	-0.0465237		-88.571	-0.0316575		-88.596	-0.0522285		-88.613	-0.0756903
-88.9	-0.0500498		-88.563	-0.0475661		-88.556	-0.0327741		-88.582	-0.0532402		-88.599	-0.0764809
-88.886	-0.0503503		-88.549	-0.0484216		-88.543	-0.0336796		-88.568	-0.0541849		-88.584	-0.0770938
-88.87	-0.051225		-88.535	-0.0492546		-88.528	-0.0345616		-88.555	-0.0551267		-88.571	-0.0775727
-88.857	-0.0522905		-88.522	-0.0497544		-88.513	-0.0356315		-88.54	-0.0561188		-88.555	-0.0781763
-88.843	-0.0529963		-88.507	-0.0504005		-88.5	-0.0366888		-88.525	-0.0569867		-88.539	-0.0788811
-88.829	-0.0535937		-88.494	-0.0512327		-88.486	-0.0376383		-88.511	-0.0577396		-88.527	-0.0796773
-88.814	-0.0545664		-88.48	-0.0523066		-88.471	-0.0385007		-88.497	-0.0584835		-88.512	-0.0807062
-88.799	-0.0551531		-88.466	-0.0532401		-88.458	-0.0393918		-88.482	-0.0590934		-88.498	-0.0814606
-88.783	-0.0561206		-88.451	-0.0541431		-88.443	-0.0405791		-88.47	-0.0597824		-88.483	-0.0819753
-88.769	-0.0566523		-88.437	-0.0548474		-88.428	-0.0412868		-88.454	-0.0604819		-88.469	-0.0827371
-88.753	-0.0571505		-88.423	-0.0554884		-88.414	-0.0424072		-88.439	-0.0611737		-88.453	-0.0832459
-88.737	-0.0575599		-88.407	-0.0562898		-88.399	-0.0431747		-88.426	-0.0619966		-88.438	-0.0838176
-88.723	-0.0579864		-88.394	-0.0568847		-88.386	-0.0439543		-88.411	-0.0625625		-88.425	-0.084535
-88.708	-0.0585453		-88.38	-0.0575293		-88.37	-0.0447746		-88.398	-0.0633137		-88.41	-0.0851956
-88.693	-0.0592781		-88.366	-0.0581134		-88.357	-0.0456741		-88.383	-0.0642012		-88.395	-0.085703
-88.678	-0.0601688		-88.352	-0.0585703		-88.342	-0.0464661		-88.368	-0.064857		-88.379	-0.0864358
-88.664	-0.0607198		-88.337	-0.0593298		-88.327	-0.047139		-88.352	-0.0655287		-88.364	-0.0869343
-88.649	-0.0611783		-88.325	-0.0601454		-88.312	-0.0476781		-88.339	-0.066308		-88.35	-0.0875072
-88.634	-0.061775		-88.309	-0.0608803		-88.296	-0.0483284		-88.323	-0.0669378		-88.333	-0.0882437
-88.62	-0.0623615		-88.295	-0.0617251		-88.282	-0.0491925		-88.31	-0.0676027		-88.319	-0.0886126
-88.603	-0.062607		-88.28	-0.0625202		-88.268	-0.0497825		-88.296	-0.0682972		-88.305	-0.089236
-88.587	-0.0633792		-88.264	-0.0630646		-88.254	-0.0504871		-88.282	-0.0690532		-88.29	-0.0897136
-88.572	-0.0637228		-88.251	-0.0638119		-88.238	-0.0510317		-88.266	-0.0697927		-88.275	-0.0901406
-88.557	-0.0640683		-88.237	-0.0644528		-88.223	-0.0520481		-88.25	-0.0705536		-88.26	-0.0907414
-88.542	-0.0645152		-88.222	-0.0650316		-88.209	-0.0528042		-88.235	-0.071275		-88.245	-0.0914285
-88.527	-0.0648979		-88.207	-0.0656576		-88.194	-0.053455		-88.22	-0.0718486		-88.229	-0.0918061
-88.513	-0.0660872		-88.193	-0.066356		-88.178	-0.0541848		-88.206	-0.0722423		-88.215	-0.0925302
-88.496	-0.0666639		-88.179	-0.0670343		-88.163	-0.0549564		-88.191	-0.0726615		-88.199	-0.0929075
-88.479	-0.0668917		-88.165	-0.0677657		-88.148	-0.0554553		-88.179	-0.0732359		-88.184	-0.0934416
-88.464	-0.0674762		-88.149	-0.068519		-88.134	-0.0562662		-88.161	-0.073686		-88.169	-0.0940201
-88.449	-0.0680292		-88.136	-0.069187		-88.119	-0.0572451		-88.147	-0.0742347		-88.154	-0.0946743
-88.434	-0.0687358		-88.12	-0.0697021		-88.103	-0.0579917		-88.131	-0.0749749		-88.138	-0.095288
-88.418	-0.0694351		-88.104	-0.0701824		-88.087	-0.0585373		-88.116	-0.0758175		-88.123	-0.095758
-88.403	-0.0701158		-88.09	-0.0708977		-88.073	-0.0591948		-88.102	-0.0764905		-88.109	-0.0960626
-88.389	-0.0705611		-88.075	-0.0716092		-88.058	-0.060034		-88.086	-0.0773188		-88.093	-0.0967063
-88.373	-0.0710483		-88.061	-0.0721407		-88.043	-0.0608193		-88.071	-0.0780124		-88.079	-0.0971546
-88.357	-0.0713399		-88.044	-0.0725988		-88.027	-0.061378		-88.055	-0.0787138		-88.062	-0.0977572
-88.341	-0.0721142		-88.03	-0.0731612		-88.013	-0.0619671		-88.04	-0.0793376		-88.047	-0.0980887
-88.324	-0.0729945		-88.015	-0.0739038		-87.997	-0.0625417		-88.027	-0.0798009		-88.032	-0.09843
-88.308	-0.0733033		-87.999	-0.0745923		-87.981	-0.0631049		-88.011	-0.0804065		-88.016	-0.0988527
-88.294	-0.0739644		-87.985	-0.0752068		-87.967	-0.0639611		-87.996	-0.0808856		-88.002	-0.0994716
-88.279	-0.0741902		-87.97	-0.0756918		-87.951	-0.0647985		-87.982	-0.081365		-87.984	-0.0999637
-88.264	-0.0749505		-87.957	-0.0761091		-87.937	-0.0653361		-87.966	-0.0821158		-87.971	-0.100494
-88.246	-0.0756521		-87.941	-0.0766529		-87.921	-0.0658164		-87.951	-0.0827575		-87.955	-0.101021
-88.231	-0.0762792		-87.925	-0.0774131		-87.907	-0.0666048		-87.938	-0.0834119		-87.94	-0.10179
-88.216	-0.0769058		-87.909	-0.078072		-87.891	-0.0670725		-87.921	-0.0840431		-87.924	-0.102443
-88.2	-0.077559		-87.895	-0.0787635		-87.874	-0.0677978		-87.905	-0.0844889		-87.908	-0.102863
-88.184	-0.0778325		-87.88	-0.0794202		-87.86	-0.068471		-87.89	-0.0849411		-87.894	-0.10344
-88.17	-0.0781803		-87.864	-0.0800958		-87.844	-0.0692351		-87.874	-0.0855627		-87.877	-0.103878
-88.153	-0.0789755		-87.849	-0.0808353		-87.83	-0.0700119		-87.86	-0.0859418		-87.861	-0.104168
-88.138	-0.0796871		-87.834	-0.0813941		-87.815	-0.0706581		-87.844	-0.0864178		-87.847	-0.104744
-88.123	-0.0803146		-87.82	-0.0818891		-87.799	-0.071308		-87.829	-0.0870712		-87.831	-0.105266
-88.108	-0.0810124		-87.804	-0.0824007		-87.783	-0.0721924		-87.814	-0.0876353		-87.815	-0.105902
-88.092	-0.0814913		-87.789	-0.0827565		-87.768	-0.0726316		-87.799	-0.0882229		-87.8	-0.106025
-88.074	-0.0821087		-87.773	-0.0831619		-87.753	-0.0732687		-87.784	-0.0888128		-87.785	-0.106236
-88.059	-0.0824825		-87.757	-0.0837533		-87.737	-0.0738535		-87.768	-0.0895666		-87.768	-0.106852
-88.042	-0.0830189		-87.743	-0.084273		-87.722	-0.074342		-87.753	-0.0902022		-87.753	-0.107345
-88.028	-0.0835538		-87.728	-0.0848197		-87.707	-0.0750135		-87.738	-0.0907671		-87.737	-0.107748
-88.012	-0.0838288		-87.712	-0.085437		-87.691	-0.0757395		-87.721	-0.0913143		-87.723	-0.108174
-87.996	-0.0840166		-87.698	-0.0861678		-87.675	-0.0765767		-87.705	-0.0919146		-87.707	-0.108507
-87.978	-0.0849963		-87.684	-0.0866979		-87.66	-0.0772294		-87.69	-0.0924447		-87.69	-0.109028
-87.964	-0.0851028		-87.668	-0.0872936		-87.645	-0.0780895		-87.675	-0.092786		-87.674	-0.109633
-87.949	-0.085561		-87.651	-0.0878996		-87.629	-0.0785616		-87.66	-0.0932588		-87.659	-0.109954
-87.934	-0.0860188		-87.636	-0.0883781		-87.613	-0.0792434		-87.643	-0.0938224		-87.643	-0.110304
-87.918	-0.0867005		-87.62	-0.0889361		-87.599	-0.0798772		-87.628	-0.0942277		-87.627	-0.110595
-87.902	-0.087268		-87.606	-0.0894885		-87.582	-0.0806291		-87.612	-0.0946662		-87.613	-0.11076
-87.884	-0.0877293		-87.589	-0.0900833		-87.566	-0.0810827		-87.597	-0.0951252		-87.596	-0.111131
-87.87	-0.0883896		-87.574	-0.0905377		-87.551	-0.081317		-87.583	-0.0955622		-87.582	-0.111743
-87.854	-0.0888941		-87.558	-0.0909992		-87.535	-0.0817206		-87.569	-0.0961631		-87.565	-0.112137
-87.838	-0.089284		-87.542	-0.0913992		-87.52	-0.0821603		-87.551	-0.0968539		-87.549	-0.112563
-87.822	-0.0898091		-87.528	-0.0919043		-87.504	-0.0825432		-87.536	-0.0974779		-87.534	-0.113007
-87.806	-0.090388		-87.512	-0.0922278		-87.489	-0.0832513		-87.52	-0.0979465		-87.518	-0.11371
-87.79	-0.0909088		-87.498	-0.0926888		-87.473	-0.0838848		-87.505	-0.0984479		-87.502	-0.114236
-87.775	-0.0912309		-87.482	-0.0932662		-87.457	-0.0842		-87.488	-0.0988006		-87.486	-0.114657
-87.759	-0.0914809		-87.468	-0.0938398		-87.443	-0.0849877		-87.473	-0.0991945		-87.47	-0.114971
-87.743	-0.0917861		-87.451	-0.0941287		-87.427	-0.0857274		-87.458	-0.099489		-87.453	-0.115279
-87.727	-0.0922479		-87.436	-0.094686		-87.411	-0.0863632		-87.443	-0.099903		-87.437	-0.115286
-87.711	-0.0924743		-87.421	-0.0951456		-87.395	-0.0869003		-87.426	-0.100222		-87.422	-0.1157
-87.696	-0.0925356		-87.405	-0.0955842		-87.38	-0.0874938		-87.411	-0.100779		-87.404	-0.115961
-87.68	-0.0925272		-87.389	-0.0960089		-87.365	-0.087872		-87.396	-0.101212		-87.39	-0.115942
-87.664	-0.092632		-87.375	-0.0962973		-87.348	-0.0880724		-87.379	-0.10163		-87.374	-0.116149
-87.647	-0.092971		-87.359	-0.0967879		-87.332	-0.0884415		-87.364	-0.102344		-87.358	-0.116449
-87.632	-0.0935583		-87.343	-0.0972855		-87.315	-0.088816		-87.348	-0.102535		-87.343	-0.116745
-87.617	-0.094247		-87.328	-0.0977607		-87.3	-0.0891318		-87.333	-0.102875		-87.327	-0.117153
-87.601	-0.0950319		-87.313	-0.0982385		-87.285	-0.0891936		-87.316	-0.103511		-87.312	-0.117386
-87.585	-0.0955863		-87.297	-0.0987252		-87.27	-0.0896249		-87.301	-0.103945		-87.296	-0.117762
-87.568	-0.0959083		-87.281	-0.0991767		-87.254	-0.0902191		-87.285	-0.104214		-87.28	-0.118199
-87.552	-0.0963115		-87.266	-0.0996626		-87.239	-0.0907666		-87.27	-0.10464		-87.264	-0.118512
-87.537	-0.0965104		-87.251	-0.100146		-87.223	-0.0910837		-87.253	-0.104793		-87.248	-0.119024
-87.521	-0.0968457		-87.235	-0.100464		-87.207	-0.0917735		-87.239	-0.105086		-87.231	-0.11922
-87.505	-0.0969762		-87.219	-0.100687		-87.191	-0.0921851		-87.222	-0.105465		-87.215	-0.119395
-87.488	-0.0969533		-87.202	-0.101011		-87.174	-0.0926009		-87.206	-0.105967		-87.2	-0.119742
[truncated: 12,948 more rows]

## Sheet: E2 elisa
Group: Standards
[truncated: 23 more rows]

## Sheet: E3 elisa
Group: Standards
[truncated: 23 more rows]

## Sheet: E2 luciferase
	avg	std
[truncated: 5 more rows]
